# Supplementary material for: Genome-wide association study for Chagas Cardiomyopathy identify a new risk locus on chromosome 18 associated with an immune-related protein and transcriptional signature
Source: PLoS Negl Trop Dis. 2022 Oct 10;16(10):e0010725. doi: 10.1371/journal.pntd.0010725 (PMC9550069; doi:10.1371/journal.pntd.0010725)
Supplement: S2 File — (XLS) [file pntd.0010725.s013.xls]

## Sheet: Enriched_pathways_over_represen
ID	Description	pvalue	p.adjust	qvalue	geneID	Count	tissue	snp
GOBP_T_CELL_ACTIVATION	GOBP_T_CELL_ACTIVATION	1.35076e-07	0.000262589	5.79305e-05	ADAM8/ZC3H12A/RASAL3/RUNX3/NOD2/TCIRG1/RABL3/BAX/CD300A	9	Adipose_Subcutaneous	rs34238187
GOBP_REGULATION_OF_CELL_CELL_ADHESION	GOBP_REGULATION_OF_CELL_CELL_ADHESION	9.25999e-07	0.000900071	0.000279622	ADAM8/ZC3H12A/TGFB1/RASAL3/RUNX3/NOD2/PLAUR/CD300A	8	Adipose_Subcutaneous	rs34238187
REACTOME_NEUTROPHIL_DEGRANULATION	REACTOME_NEUTROPHIL_DEGRANULATION	1.83222e-06	0.00118728	0.000354871	C5AR1/ADAM8/OSCAR/MVP/TCIRG1/PLAUR/DYNLT1/CD300A	8	Adipose_Subcutaneous	rs34238187
GOBP_CELLULAR_DEFENSE_RESPONSE	GOBP_CELLULAR_DEFENSE_RESPONSE	2.45465e-06	0.00119296	0.000446613	C5AR1/FCMR/TRAT1/TCIRG1	4	Adipose_Subcutaneous	rs34238187
GOBP_LEUKOCYTE_CELL_CELL_ADHESION	GOBP_LEUKOCYTE_CELL_CELL_ADHESION	3.48324e-06	0.00129588	0.000580948	ADAM8/ZC3H12A/RASAL3/SLC39A8/RUNX3/NOD2/CD300A	7	Adipose_Subcutaneous	rs34238187
GOBP_POSITIVE_REGULATION_OF_INTERLEUKIN_17_PRODUCTION	GOBP_POSITIVE_REGULATION_OF_INTERLEUKIN_17_PRODUCTION	3.99964e-06	0.00129588	0.000631965	TGFB1/OSM/NOD2	3	Adipose_Subcutaneous	rs34238187
GOBP_TISSUE_HOMEOSTASIS	GOBP_TISSUE_HOMEOSTASIS	6.24777e-06	0.00155141	0.000871211	ZG16B/ADAM8/SLC39A8/NOD2/TCIRG1/BAX	6	Adipose_Subcutaneous	rs34238187
GOBP_ALPHA_BETA_T_CELL_ACTIVATION	GOBP_ALPHA_BETA_T_CELL_ACTIVATION	6.3844e-06	0.00155141	0.000871211	ZC3H12A/RASAL3/RUNX3/TCIRG1/CD300A	5	Adipose_Subcutaneous	rs34238187
GOBP_EPITHELIAL_CELL_PROLIFERATION	GOBP_EPITHELIAL_CELL_PROLIFERATION	9.65231e-06	0.0020849	0.00123307	C5AR1/TGFB1/RPS6KA1/VDR/RUNX3/NOD2/BAX	7	Adipose_Subcutaneous	rs34238187
GOBP_POSITIVE_REGULATION_OF_PROTEIN_KINASE_B_SIGNALING	GOBP_POSITIVE_REGULATION_OF_PROTEIN_KINASE_B_SIGNALING	1.39214e-05	0.00259684	0.00157185	ADAM8/TGFB1/OSM/TPBG/TRAT1	5	Adipose_Subcutaneous	rs34238187
REACTOME_SIGNALING_BY_INTERLEUKINS	REACTOME_SIGNALING_BY_INTERLEUKINS	1.60133e-05	0.00259684	0.00157185	TGFB1/RPS6KA1/OSM/SERPINB2/NOD2/IL18BP/STXBP2	7	Adipose_Subcutaneous	rs34238187
GOBP_REGULATION_OF_MAP_KINASE_ACTIVITY	GOBP_REGULATION_OF_MAP_KINASE_ACTIVITY	1.60299e-05	0.00259684	0.00157185	C5AR1/ADAM8/TGFB1/GNG3/NOD2/CD300A	6	Adipose_Subcutaneous	rs34238187
GOBP_B_CELL_ACTIVATION	GOBP_B_CELL_ACTIVATION	1.98879e-05	0.00286903	0.00157185	TGFB1/NOD2/TCIRG1/RABL3/BAX/CD300A	6	Adipose_Subcutaneous	rs34238187
GOBP_REGULATION_OF_RAS_PROTEIN_SIGNAL_TRANSDUCTION	GOBP_REGULATION_OF_RAS_PROTEIN_SIGNAL_TRANSDUCTION	2.06796e-05	0.00286903	0.00157185	CDC42SE1/RASAL3/KIF14/RABL3/DYNLT1	5	Adipose_Subcutaneous	rs34238187
GOBP_REGULATION_OF_T_CELL_ACTIVATION	GOBP_REGULATION_OF_T_CELL_ACTIVATION	2.28522e-05	0.00286903	0.00157185	ADAM8/ZC3H12A/RASAL3/RUNX3/NOD2/CD300A	6	Adipose_Subcutaneous	rs34238187
GOBP_REGULATION_OF_PROTEIN_SERINE_THREONINE_KINASE_ACTIVITY	GOBP_REGULATION_OF_PROTEIN_SERINE_THREONINE_KINASE_ACTIVITY	2.36134e-05	0.00286903	0.00157185	C5AR1/ADAM8/TGFB1/GNG3/NOD2/PRKAG1/CD300A	7	Adipose_Subcutaneous	rs34238187
GOBP_RAS_PROTEIN_SIGNAL_TRANSDUCTION	GOBP_RAS_PROTEIN_SIGNAL_TRANSDUCTION	2.74994e-05	0.00304956	0.00161875	CDC42SE1/RASAL3/DNMT1/KIF14/RABL3/DYNLT1	6	Adipose_Subcutaneous	rs34238187
GOBP_REGULATION_OF_LEUKOCYTE_MIGRATION	GOBP_REGULATION_OF_LEUKOCYTE_MIGRATION	2.9753e-05	0.00304956	0.00172074	C5AR1/ADAM8/NOD2/RIN3/CD300A	5	Adipose_Subcutaneous	rs34238187
GOBP_REGULATION_OF_ALPHA_BETA_T_CELL_ACTIVATION	GOBP_REGULATION_OF_ALPHA_BETA_T_CELL_ACTIVATION	2.98053e-05	0.00304956	0.00172074	ZC3H12A/RASAL3/RUNX3/CD300A	4	Adipose_Subcutaneous	rs34238187
GOBP_MYELOID_LEUKOCYTE_MIGRATION	GOBP_MYELOID_LEUKOCYTE_MIGRATION	3.90195e-05	0.0037927	0.00218955	C5AR1/ADAM8/NOD2/RIN3/CD300A	5	Adipose_Subcutaneous	rs34238187
GOBP_REGULATION_OF_CHEMOTAXIS	GOBP_REGULATION_OF_CHEMOTAXIS	4.53727e-05	0.00420022	0.00252248	C5AR1/TGFB1/TPBG/NOD2/RIN3	5	Adipose_Subcutaneous	rs34238187
GOBP_NEGATIVE_REGULATION_OF_ALPHA_BETA_T_CELL_ACTIVATION	GOBP_NEGATIVE_REGULATION_OF_ALPHA_BETA_T_CELL_ACTIVATION	5.07774e-05	0.00434703	0.00274665	ZC3H12A/RUNX3/CD300A	3	Adipose_Subcutaneous	rs34238187
GOBP_POSITIVE_REGULATION_OF_MAP_KINASE_ACTIVITY	GOBP_POSITIVE_REGULATION_OF_MAP_KINASE_ACTIVITY	5.14309e-05	0.00434703	0.00275716	C5AR1/ADAM8/TGFB1/GNG3/NOD2	5	Adipose_Subcutaneous	rs34238187
GOBP_REGULATION_OF_NEUTROPHIL_MIGRATION	GOBP_REGULATION_OF_NEUTROPHIL_MIGRATION	5.46154e-05	0.00442385	0.00287651	C5AR1/ADAM8/NOD2	3	Adipose_Subcutaneous	rs34238187
GOBP_INTERLEUKIN_17_PRODUCTION	GOBP_INTERLEUKIN_17_PRODUCTION	5.86387e-05	0.00455975	0.00303517	TGFB1/OSM/NOD2	3	Adipose_Subcutaneous	rs34238187
GOBP_NEGATIVE_REGULATION_OF_IMMUNE_EFFECTOR_PROCESS	GOBP_NEGATIVE_REGULATION_OF_IMMUNE_EFFECTOR_PROCESS	6.85685e-05	0.00501948	0.00348898	ZC3H12A/TGFB1/NOD2/CD300A	4	Adipose_Subcutaneous	rs34238187
GOBP_T_CELL_DIFFERENTIATION	GOBP_T_CELL_DIFFERENTIATION	7.06677e-05	0.00501948	0.00353587	ADAM8/ZC3H12A/RUNX3/TCIRG1/RABL3	5	Adipose_Subcutaneous	rs34238187
GOBP_NEGATIVE_REGULATION_OF_IMMUNE_SYSTEM_PROCESS	GOBP_NEGATIVE_REGULATION_OF_IMMUNE_SYSTEM_PROCESS	7.28713e-05	0.00501948	0.00361599	ZC3H12A/TGFB1/RUNX3/NOD2/RIN3/CD300A	6	Adipose_Subcutaneous	rs34238187
GOBP_POSITIVE_REGULATION_OF_CELL_ACTIVATION	GOBP_POSITIVE_REGULATION_OF_CELL_ACTIVATION	7.48791e-05	0.00501948	0.0036552	ADAM8/TGFB1/RPS6KA1/RASAL3/RUNX3/NOD2	6	Adipose_Subcutaneous	rs34238187
GOBP_MONONUCLEAR_CELL_DIFFERENTIATION	GOBP_MONONUCLEAR_CELL_DIFFERENTIATION	8.1169e-05	0.00525975	0.00385374	ADAM8/ZC3H12A/RUNX3/TCIRG1/RABL3/BAX	6	Adipose_Subcutaneous	rs34238187
GOBP_NEGATIVE_REGULATION_OF_NEURON_APOPTOTIC_PROCESS	GOBP_NEGATIVE_REGULATION_OF_NEURON_APOPTOTIC_PROCESS	9.24135e-05	0.0057731	0.00411015	C5AR1/ADAM8/KIF14/BAX	4	Adipose_Subcutaneous	rs34238187
GOBP_REGULATION_OF_PEPTIDYL_TYROSINE_PHOSPHORYLATION	GOBP_REGULATION_OF_PEPTIDYL_TYROSINE_PHOSPHORYLATION	9.50305e-05	0.0057731	0.00419546	TGFB1/OSM/MVP/NOD2/CD300A	5	Adipose_Subcutaneous	rs34238187
GOBP_PROTEIN_KINASE_B_SIGNALING	GOBP_PROTEIN_KINASE_B_SIGNALING	0.000115204	0.00678655	0.00490573	ADAM8/TGFB1/OSM/TPBG/TRAT1	5	Adipose_Subcutaneous	rs34238187
GOBP_POSITIVE_REGULATION_OF_CELL_CELL_ADHESION	GOBP_POSITIVE_REGULATION_OF_CELL_CELL_ADHESION	0.000121237	0.00693189	0.00509043	ADAM8/RASAL3/RUNX3/NOD2/PLAUR	5	Adipose_Subcutaneous	rs34238187
GOBP_GRANULOCYTE_MIGRATION	GOBP_GRANULOCYTE_MIGRATION	0.000128377	0.00713043	0.0053528	C5AR1/ADAM8/NOD2/CD300A	4	Adipose_Subcutaneous	rs34238187
REACTOME_RUNX3_REGULATES_P14_ARF	REACTOME_RUNX3_REGULATES_P14_ARF	0.000132229	0.00714039	0.0054754	TGFB1/RUNX3	2	Adipose_Subcutaneous	rs34238187
GOBP_REGULATION_OF_IMMUNE_EFFECTOR_PROCESS	GOBP_REGULATION_OF_IMMUNE_EFFECTOR_PROCESS	0.000157078	0.00804679	0.00617372	C5AR1/ZC3H12A/TGFB1/NOD2/STXBP2/CD300A	6	Adipose_Subcutaneous	rs34238187
GOBP_ANATOMICAL_STRUCTURE_HOMEOSTASIS	GOBP_ANATOMICAL_STRUCTURE_HOMEOSTASIS	0.000160772	0.00804679	0.00617372	ZG16B/ADAM8/SLC39A8/NOD2/TCIRG1/BAX	6	Adipose_Subcutaneous	rs34238187
GOBP_NK_T_CELL_ACTIVATION	GOBP_NK_T_CELL_ACTIVATION	0.000161433	0.00804679	0.00617372	RASAL3/CD300A	2	Adipose_Subcutaneous	rs34238187
GOBP_CELL_CHEMOTAXIS	GOBP_CELL_CHEMOTAXIS	0.000192882	0.00917481	0.0068747	C5AR1/ADAM8/TPBG/NOD2/RIN3	5	Adipose_Subcutaneous	rs34238187
GOBP_RESPONSE_TO_PEPTIDOGLYCAN	GOBP_RESPONSE_TO_PEPTIDOGLYCAN	0.000193502	0.00917481	0.0068747	C5AR1/NOD2	2	Adipose_Subcutaneous	rs34238187
GOBP_POSITIVE_REGULATION_OF_PROTEIN_SERINE_THREONINE_KINASE_ACTIVITY	GOBP_POSITIVE_REGULATION_OF_PROTEIN_SERINE_THREONINE_KINASE_ACTIVITY	0.000211055	0.00976884	0.00728287	C5AR1/ADAM8/TGFB1/GNG3/NOD2	5	Adipose_Subcutaneous	rs34238187
REACTOME_DISSOLUTION_OF_FIBRIN_CLOT	REACTOME_DISSOLUTION_OF_FIBRIN_CLOT	0.000228427	0.0100923	0.00764452	SERPINB2/PLAUR	2	Adipose_Subcutaneous	rs34238187
REACTOME_PURINE_SALVAGE	REACTOME_PURINE_SALVAGE	0.000228427	0.0100923	0.00764452	ADAL/AMPD2	2	Adipose_Subcutaneous	rs34238187
GOBP_REGULATION_OF_SMALL_GTPASE_MEDIATED_SIGNAL_TRANSDUCTION	GOBP_REGULATION_OF_SMALL_GTPASE_MEDIATED_SIGNAL_TRANSDUCTION	0.000237283	0.0102506	0.00777073	CDC42SE1/RASAL3/KIF14/RABL3/DYNLT1	5	Adipose_Subcutaneous	rs34238187
GOBP_TISSUE_REMODELING	GOBP_TISSUE_REMODELING	0.000250282	0.0105771	0.00777073	ADAM8/TGFB1/TCIRG1/BAX	4	Adipose_Subcutaneous	rs34238187
GOBP_ACTIVATION_OF_PROTEIN_KINASE_ACTIVITY	GOBP_ACTIVATION_OF_PROTEIN_KINASE_ACTIVITY	0.000269679	0.010922	0.00777073	C5AR1/KIF14/GNG3/NOD2/CD300A	5	Adipose_Subcutaneous	rs34238187
GOBP_REGULATION_OF_AUTOPHAGY	GOBP_REGULATION_OF_AUTOPHAGY	0.000269679	0.010922	0.00777073	ZC3H12A/DRAM1/GPSM1/NOD2/PRKAG1	5	Adipose_Subcutaneous	rs34238187
GOBP_NEGATIVE_REGULATION_OF_PRODUCTION_OF_MIRNAS_INVOLVED_IN_GENE_SILENCING_BY_MIRNA	GOBP_NEGATIVE_REGULATION_OF_PRODUCTION_OF_MIRNAS_INVOLVED_IN_GENE_SILENCING_BY_MIRNA	0.000306809	0.0119287	0.00777073	ZC3H12A/TGFB1	2	Adipose_Subcutaneous	rs34238187
GOBP_PURINE_CONTAINING_COMPOUND_SALVAGE	GOBP_PURINE_CONTAINING_COMPOUND_SALVAGE	0.000306809	0.0119287	0.00777073	ADAL/AMPD2	2	Adipose_Subcutaneous	rs34238187
GOBP_NEGATIVE_REGULATION_OF_CELL_CELL_ADHESION	GOBP_NEGATIVE_REGULATION_OF_CELL_CELL_ADHESION	0.000335226	0.012778	0.00777073	ZC3H12A/TGFB1/RUNX3/CD300A	4	Adipose_Subcutaneous	rs34238187
GOBP_POSITIVE_REGULATION_OF_LYMPHOCYTE_APOPTOTIC_PROCESS	GOBP_POSITIVE_REGULATION_OF_LYMPHOCYTE_APOPTOTIC_PROCESS	0.000350246	0.0128468	0.00777073	ADAM8/BAX	2	Adipose_Subcutaneous	rs34238187
GOBP_THYMOCYTE_APOPTOTIC_PROCESS	GOBP_THYMOCYTE_APOPTOTIC_PROCESS	0.000350246	0.0128468	0.00777073	ADAM8/BAX	2	Adipose_Subcutaneous	rs34238187
GOBP_REGULATION_OF_LEUKOCYTE_APOPTOTIC_PROCESS	GOBP_REGULATION_OF_LEUKOCYTE_APOPTOTIC_PROCESS	0.000372872	0.0133354	0.00777073	ADAM8/NOD2/BAX	3	Adipose_Subcutaneous	rs34238187
GOBP_NEGATIVE_REGULATION_OF_NEURON_DEATH	GOBP_NEGATIVE_REGULATION_OF_NEURON_DEATH	0.000377287	0.0133354	0.00777073	C5AR1/ADAM8/KIF14/BAX	4	Adipose_Subcutaneous	rs34238187
GOBP_REGULATION_OF_CYSTEINE_TYPE_ENDOPEPTIDASE_ACTIVITY_INVOLVED_IN_APOPTOTIC_SIGNALING_PATHWAY	GOBP_REGULATION_OF_CYSTEINE_TYPE_ENDOPEPTIDASE_ACTIVITY_INVOLVED_IN_APOPTOTIC_SIGNALING_PATHWAY	0.0003965	0.0137235	0.00777073	PLAUR/BAX	2	Adipose_Subcutaneous	rs34238187
GOBP_ADAPTIVE_IMMUNE_RESPONSE_BASED_ON_SOMATIC_RECOMBINATION_OF_IMMUNE_RECEPTORS_BUILT_FROM_IMMUNOGLOBULIN_SUPERFAMILY_DOMAINS	GOBP_ADAPTIVE_IMMUNE_RESPONSE_BASED_ON_SOMATIC_RECOMBINATION_OF_IMMUNE_RECEPTORS_BUILT_FROM_IMMUNOGLOBULIN_SUPERFAMILY_DOMAINS	0.000402387	0.0137235	0.00777073	ZC3H12A/TGFB1/NOD2/TCIRG1/IL18BP	5	Adipose_Subcutaneous	rs34238187
GOBP_POSITIVE_REGULATION_OF_CELL_DIVISION	GOBP_POSITIVE_REGULATION_OF_CELL_DIVISION	0.000461017	0.015452	0.00849093	TGFB1/OSM/KIF14	3	Adipose_Subcutaneous	rs34238187
GOBP_PEPTIDYL_TYROSINE_MODIFICATION	GOBP_PEPTIDYL_TYROSINE_MODIFICATION	0.000478964	0.0156132	0.00874104	TGFB1/OSM/MVP/NOD2/CD300A	5	Adipose_Subcutaneous	rs34238187
GOBP_POSITIVE_REGULATION_OF_ERK1_AND_ERK2_CASCADE	GOBP_POSITIVE_REGULATION_OF_ERK1_AND_ERK2_CASCADE	0.000489922	0.0156132	0.00888699	C5AR1/TGFB1/TPBG/NOD2	4	Adipose_Subcutaneous	rs34238187
GOBP_REGULATION_OF_LEUKOCYTE_MEDIATED_IMMUNITY	GOBP_REGULATION_OF_LEUKOCYTE_MEDIATED_IMMUNITY	0.000489922	0.0156132	0.00888699	TGFB1/NOD2/STXBP2/CD300A	4	Adipose_Subcutaneous	rs34238187
GOBP_BONE_REMODELING	GOBP_BONE_REMODELING	0.000509681	0.015981	0.00921757	ADAM8/TGFB1/TCIRG1	3	Adipose_Subcutaneous	rs34238187
GOBP_POSITIVE_REGULATION_OF_IMMUNE_EFFECTOR_PROCESS	GOBP_POSITIVE_REGULATION_OF_IMMUNE_EFFECTOR_PROCESS	0.000583788	0.018014	0.0103704	TGFB1/NOD2/STXBP2/CD300A	4	Adipose_Subcutaneous	rs34238187
GOBP_LEUKOCYTE_CHEMOTAXIS	GOBP_LEUKOCYTE_CHEMOTAXIS	0.000645873	0.0194314	0.0112405	C5AR1/ADAM8/NOD2/RIN3	4	Adipose_Subcutaneous	rs34238187
GOBP_EOSINOPHIL_MIGRATION	GOBP_EOSINOPHIL_MIGRATION	0.000669703	0.0194314	0.0115216	ADAM8/CD300A	2	Adipose_Subcutaneous	rs34238187
GOBP_NEGATIVE_REGULATION_OF_CD4_POSITIVE_ALPHA_BETA_T_CELL_DIFFERENTIATION	GOBP_NEGATIVE_REGULATION_OF_CD4_POSITIVE_ALPHA_BETA_T_CELL_DIFFERENTIATION	0.000669703	0.0194314	0.0115216	ZC3H12A/RUNX3	2	Adipose_Subcutaneous	rs34238187
GOBP_NEGATIVE_REGULATION_OF_POSTTRANSCRIPTIONAL_GENE_SILENCING	GOBP_NEGATIVE_REGULATION_OF_POSTTRANSCRIPTIONAL_GENE_SILENCING	0.000669703	0.0194314	0.0115216	ZC3H12A/TGFB1	2	Adipose_Subcutaneous	rs34238187
GOBP_NEURON_APOPTOTIC_PROCESS	GOBP_NEURON_APOPTOTIC_PROCESS	0.000689778	0.0196873	0.0117993	C5AR1/ADAM8/KIF14/BAX	4	Adipose_Subcutaneous	rs34238187
GOBP_CD4_POSITIVE_ALPHA_BETA_T_CELL_ACTIVATION	GOBP_CD4_POSITIVE_ALPHA_BETA_T_CELL_ACTIVATION	0.000715903	0.0196873	0.0120141	ZC3H12A/RUNX3/TCIRG1	3	Adipose_Subcutaneous	rs34238187
GOBP_NEGATIVE_REGULATION_OF_PHOSPHORYLATION	GOBP_NEGATIVE_REGULATION_OF_PHOSPHORYLATION	0.000718341	0.0196873	0.0120141	ZC3H12A/TGFB1/MVP/BAX/CD300A	5	Adipose_Subcutaneous	rs34238187
REACTOME_NUCLEOTIDE_SALVAGE	REACTOME_NUCLEOTIDE_SALVAGE	0.000732663	0.0196873	0.0121521	ADAL/AMPD2	2	Adipose_Subcutaneous	rs34238187
GOBP_POSITIVE_REGULATION_OF_LEUKOCYTE_CELL_CELL_ADHESION	GOBP_POSITIVE_REGULATION_OF_LEUKOCYTE_CELL_CELL_ADHESION	0.000747582	0.0196873	0.0123589	ADAM8/RASAL3/RUNX3/NOD2	4	Adipose_Subcutaneous	rs34238187
GOBP_CHONDROCYTE_DIFFERENTIATION	GOBP_CHONDROCYTE_DIFFERENTIATION	0.000758298	0.0196873	0.0123589	TGFB1/RUNX3/CHST11	3	Adipose_Subcutaneous	rs34238187
GOBP_LEUKOCYTE_APOPTOTIC_PROCESS	GOBP_LEUKOCYTE_APOPTOTIC_PROCESS	0.000758298	0.0196873	0.0123589	ADAM8/NOD2/BAX	3	Adipose_Subcutaneous	rs34238187
GOBP_CELLULAR_RESPONSE_TO_EXTRACELLULAR_STIMULUS	GOBP_CELLULAR_RESPONSE_TO_EXTRACELLULAR_STIMULUS	0.000759541	0.0196873	0.0123589	AQP3/ZC3H12A/VDR/PRKAG1	4	Adipose_Subcutaneous	rs34238187
GOBP_FIBRINOLYSIS	GOBP_FIBRINOLYSIS	0.000866825	0.0217248	0.01362	SERPINB2/PLAUR	2	Adipose_Subcutaneous	rs34238187
GOBP_CEREBRAL_CORTEX_DEVELOPMENT	GOBP_CEREBRAL_CORTEX_DEVELOPMENT	0.000871186	0.0217248	0.01362	KIF14/MBOAT7/BAX	3	Adipose_Subcutaneous	rs34238187
GOBP_POSITIVE_REGULATION_OF_CELL_ADHESION	GOBP_POSITIVE_REGULATION_OF_CELL_ADHESION	0.000871676	0.0217248	0.01362	ADAM8/RASAL3/RUNX3/NOD2/PLAUR	5	Adipose_Subcutaneous	rs34238187
GOBP_ESTABLISHMENT_OF_ORGANELLE_LOCALIZATION	GOBP_ESTABLISHMENT_OF_ORGANELLE_LOCALIZATION	0.00092784	0.0222377	0.0143477	KIF14/TCIRG1/DYNLT1/STXBP2/CD300A	5	Adipose_Subcutaneous	rs34238187
GOBP_NEGATIVE_REGULATION_OF_ALPHA_BETA_T_CELL_DIFFERENTIATION	GOBP_NEGATIVE_REGULATION_OF_ALPHA_BETA_T_CELL_DIFFERENTIATION	0.000938009	0.0222377	0.0143477	ZC3H12A/RUNX3	2	Adipose_Subcutaneous	rs34238187
GOBP_POSITIVE_REGULATION_OF_LEUKOCYTE_APOPTOTIC_PROCESS	GOBP_POSITIVE_REGULATION_OF_LEUKOCYTE_APOPTOTIC_PROCESS	0.000938009	0.0222377	0.0143477	ADAM8/BAX	2	Adipose_Subcutaneous	rs34238187
GOBP_REGULATION_OF_PRODUCTION_OF_SMALL_RNA_INVOLVED_IN_GENE_SILENCING_BY_RNA	GOBP_REGULATION_OF_PRODUCTION_OF_SMALL_RNA_INVOLVED_IN_GENE_SILENCING_BY_RNA	0.000938009	0.0222377	0.0143477	ZC3H12A/TGFB1	2	Adipose_Subcutaneous	rs34238187
GOBP_GLAND_MORPHOGENESIS	GOBP_GLAND_MORPHOGENESIS	0.000968782	0.0226905	0.0146888	TGFB1/RPS6KA1/BAX	3	Adipose_Subcutaneous	rs34238187
GOBP_POSITIVE_REGULATION_OF_CYTOKINE_PRODUCTION	GOBP_POSITIVE_REGULATION_OF_CYTOKINE_PRODUCTION	0.000986658	0.0228341	0.0148847	C5AR1/ADAM8/TGFB1/OSM/NOD2	5	Adipose_Subcutaneous	rs34238187
GOBP_POSITIVE_REGULATION_OF_ACUTE_INFLAMMATORY_RESPONSE	GOBP_POSITIVE_REGULATION_OF_ACUTE_INFLAMMATORY_RESPONSE	0.00101192	0.022874	0.0151138	ADAM8/OSM	2	Adipose_Subcutaneous	rs34238187
GOBP_POSITIVE_REGULATION_OF_RELEASE_OF_CYTOCHROME_C_FROM_MITOCHONDRIA	GOBP_POSITIVE_REGULATION_OF_RELEASE_OF_CYTOCHROME_C_FROM_MITOCHONDRIA	0.00101192	0.022874	0.0151138	PLAUR/BAX	2	Adipose_Subcutaneous	rs34238187
GOBP_POSITIVE_REGULATION_OF_VASCULAR_ENDOTHELIAL_GROWTH_FACTOR_PRODUCTION	GOBP_POSITIVE_REGULATION_OF_VASCULAR_ENDOTHELIAL_GROWTH_FACTOR_PRODUCTION	0.00108854	0.0243231	0.0160249	C5AR1/TGFB1	2	Adipose_Subcutaneous	rs34238187
REACTOME_PLATELET_ACTIVATION_SIGNALING_AND_AGGREGATION	REACTOME_PLATELET_ACTIVATION_SIGNALING_AND_AGGREGATION	0.00112025	0.0245419	0.0164054	TGFB1/DGKA/GNG3/STXBP2	4	Adipose_Subcutaneous	rs34238187
GOBP_POSITIVE_REGULATION_OF_CATABOLIC_PROCESS	GOBP_POSITIVE_REGULATION_OF_CATABOLIC_PROCESS	0.00112358	0.0245419	0.0164141	ADAM8/ZC3H12A/GPSM1/NOD2/BAX	5	Adipose_Subcutaneous	rs34238187
GOBP_POSITIVE_REGULATION_OF_NEUTROPHIL_MIGRATION	GOBP_POSITIVE_REGULATION_OF_NEUTROPHIL_MIGRATION	0.00116786	0.0249603	0.0168639	C5AR1/ADAM8	2	Adipose_Subcutaneous	rs34238187
GOBP_NEGATIVE_REGULATION_OF_HYDROLASE_ACTIVITY	GOBP_NEGATIVE_REGULATION_OF_HYDROLASE_ACTIVITY	0.00116841	0.0249603	0.0168639	CDC42SE1/RPS6KA1/SERPINB2/GPSM1/PLAUR	5	Adipose_Subcutaneous	rs34238187
GOBP_REGULATION_OF_LEUKOCYTE_CHEMOTAXIS	GOBP_REGULATION_OF_LEUKOCYTE_CHEMOTAXIS	0.00118414	0.0250214	0.01705	C5AR1/NOD2/RIN3	3	Adipose_Subcutaneous	rs34238187
GOBP_POSITIVE_REGULATION_OF_AUTOPHAGY	GOBP_POSITIVE_REGULATION_OF_AUTOPHAGY	0.001213	0.0253557	0.0173822	ZC3H12A/GPSM1/NOD2	3	Adipose_Subcutaneous	rs34238187
GOBP_REGULATION_OF_MAST_CELL_ACTIVATION_INVOLVED_IN_IMMUNE_RESPONSE	GOBP_REGULATION_OF_MAST_CELL_ACTIVATION_INVOLVED_IN_IMMUNE_RESPONSE	0.00124988	0.0258485	0.0177832	STXBP2/CD300A	2	Adipose_Subcutaneous	rs34238187
GOBP_NEUTROPHIL_MIGRATION	GOBP_NEUTROPHIL_MIGRATION	0.00127205	0.0260302	0.0179288	C5AR1/ADAM8/NOD2	3	Adipose_Subcutaneous	rs34238187
GOBP_EPIDERMAL_GROWTH_FACTOR_RECEPTOR_SIGNALING_PATHWAY	GOBP_EPIDERMAL_GROWTH_FACTOR_RECEPTOR_SIGNALING_PATHWAY	0.00130224	0.0260986	0.0182686	TGFB1/MVP/PLAUR	3	Adipose_Subcutaneous	rs34238187
GOBP_ODONTOGENESIS	GOBP_ODONTOGENESIS	0.00130224	0.0260986	0.0182686	AQP3/TCIRG1/BAX	3	Adipose_Subcutaneous	rs34238187
GOBP_NEGATIVE_REGULATION_OF_FIBROBLAST_PROLIFERATION	GOBP_NEGATIVE_REGULATION_OF_FIBROBLAST_PROLIFERATION	0.00133458	0.0264737	0.0185732	BAX/CD300A	2	Adipose_Subcutaneous	rs34238187
GOBP_NEGATIVE_REGULATION_OF_CD4_POSITIVE_ALPHA_BETA_T_CELL_ACTIVATION	GOBP_NEGATIVE_REGULATION_OF_CD4_POSITIVE_ALPHA_BETA_T_CELL_ACTIVATION	0.00142196	0.0272765	0.0191859	ZC3H12A/RUNX3	2	Adipose_Subcutaneous	rs34238187
GOBP_REGULATION_OF_NEUTROPHIL_CHEMOTAXIS	GOBP_REGULATION_OF_NEUTROPHIL_CHEMOTAXIS	0.00142196	0.0272765	0.0191859	C5AR1/NOD2	2	Adipose_Subcutaneous	rs34238187
GOMF_DEAMINASE_ACTIVITY	GOMF_DEAMINASE_ACTIVITY	0.00142196	0.0272765	0.0191859	ADAL/AMPD2	2	Adipose_Subcutaneous	rs34238187
GOBP_REGULATION_OF_LEUKOCYTE_DIFFERENTIATION	GOBP_REGULATION_OF_LEUKOCYTE_DIFFERENTIATION	0.00143118	0.0272765	0.0192239	ADAM8/ZC3H12A/TGFB1/RUNX3	4	Adipose_Subcutaneous	rs34238187
GOBP_RESPONSE_TO_EXTRACELLULAR_STIMULUS	GOBP_RESPONSE_TO_EXTRACELLULAR_STIMULUS	0.00145242	0.0274127	0.0194224	AQP3/ZC3H12A/VDR/NOD2/PRKAG1	5	Adipose_Subcutaneous	rs34238187
GOMF_MOTOR_ACTIVITY	GOMF_MOTOR_ACTIVITY	0.00149289	0.0279055	0.0198218	KIF14/APPBP2/DYNLT1	3	Adipose_Subcutaneous	rs34238187
GOBP_REGULATION_OF_PROTEIN_LOCALIZATION_TO_NUCLEUS	GOBP_REGULATION_OF_PROTEIN_LOCALIZATION_TO_NUCLEUS	0.00152626	0.0282577	0.0199218	ZC3H12A/TGFB1/RASSF5	3	Adipose_Subcutaneous	rs34238187
GOBP_REGULATION_OF_GTPASE_ACTIVITY	GOBP_REGULATION_OF_GTPASE_ACTIVITY	0.00156223	0.0286507	0.020347	CDC42SE1/RASAL3/GPSM1/RIN3/DYNLT1	5	Adipose_Subcutaneous	rs34238187
GOBP_CELLULAR_METABOLIC_COMPOUND_SALVAGE	GOBP_CELLULAR_METABOLIC_COMPOUND_SALVAGE	0.00160471	0.0288848	0.02081	ADAL/AMPD2	2	Adipose_Subcutaneous	rs34238187
GOBP_RESPONSE_TO_VITAMIN_D	GOBP_RESPONSE_TO_VITAMIN_D	0.00160471	0.0288848	0.02081	AQP3/VDR	2	Adipose_Subcutaneous	rs34238187
GOMF_HYDROLASE_ACTIVITY_ACTING_ON_CARBON_NITROGEN_BUT_NOT_PEPTIDE_BONDS_IN_CYCLIC_AMIDINES	GOMF_HYDROLASE_ACTIVITY_ACTING_ON_CARBON_NITROGEN_BUT_NOT_PEPTIDE_BONDS_IN_CYCLIC_AMIDINES	0.00170006	0.0295723	0.0218109	ADAL/AMPD2	2	Adipose_Subcutaneous	rs34238187
GOBP_NEUTRAL_LIPID_METABOLIC_PROCESS	GOBP_NEUTRAL_LIPID_METABOLIC_PROCESS	0.00173639	0.0295723	0.0220882	DGKA/MBOAT7/MTTP	3	Adipose_Subcutaneous	rs34238187
GOBP_POSITIVE_REGULATION_OF_PROTEIN_MODIFICATION_BY_SMALL_PROTEIN_CONJUGATION_OR_REMOVAL	GOBP_POSITIVE_REGULATION_OF_PROTEIN_MODIFICATION_BY_SMALL_PROTEIN_CONJUGATION_OR_REMOVAL	0.00173639	0.0295723	0.0220882	ZC3H12A/NOD2/RASSF5	3	Adipose_Subcutaneous	rs34238187
GOBP_NEGATIVE_REGULATION_OF_CELL_ADHESION	GOBP_NEGATIVE_REGULATION_OF_CELL_ADHESION	0.0017542	0.0295723	0.0222676	ZC3H12A/TGFB1/RUNX3/CD300A	4	Adipose_Subcutaneous	rs34238187
GOBP_DIVALENT_INORGANIC_CATION_HOMEOSTASIS	GOBP_DIVALENT_INORGANIC_CATION_HOMEOSTASIS	0.00176894	0.0295723	0.0223653	C5AR1/SLC39A8/GNG3/TCIRG1/BAX	5	Adipose_Subcutaneous	rs34238187
GOBP_B_CELL_DIFFERENTIATION	GOBP_B_CELL_DIFFERENTIATION	0.00177307	0.0295723	0.0223653	TCIRG1/RABL3/BAX	3	Adipose_Subcutaneous	rs34238187
GOBP_CYTOCHROME_COMPLEX_ASSEMBLY	GOBP_CYTOCHROME_COMPLEX_ASSEMBLY	0.00179805	0.0295723	0.0224914	LYRM7/FASTKD3	2	Adipose_Subcutaneous	rs34238187
GOBP_NEGATIVE_REGULATION_OF_GENE_SILENCING	GOBP_NEGATIVE_REGULATION_OF_GENE_SILENCING	0.00179805	0.0295723	0.0224914	ZC3H12A/TGFB1	2	Adipose_Subcutaneous	rs34238187
GOBP_T_CELL_HOMEOSTASIS	GOBP_T_CELL_HOMEOSTASIS	0.00179805	0.0295723	0.0224914	TCIRG1/BAX	2	Adipose_Subcutaneous	rs34238187
GOBP_NEGATIVE_REGULATION_OF_LEUKOCYTE_CELL_CELL_ADHESION	GOBP_NEGATIVE_REGULATION_OF_LEUKOCYTE_CELL_CELL_ADHESION	0.00181024	0.0295723	0.0225032	ZC3H12A/RUNX3/CD300A	3	Adipose_Subcutaneous	rs34238187
GOBP_NEURAL_PRECURSOR_CELL_PROLIFERATION	GOBP_NEURAL_PRECURSOR_CELL_PROLIFERATION	0.00181024	0.0295723	0.0225032	C5AR1/KIF14/ORC3	3	Adipose_Subcutaneous	rs34238187
GOBP_POSITIVE_REGULATION_OF_CHEMOTAXIS	GOBP_POSITIVE_REGULATION_OF_CHEMOTAXIS	0.00184789	0.0299358	0.0229238	C5AR1/TGFB1/TPBG	3	Adipose_Subcutaneous	rs34238187
GOBP_POSITIVE_REGULATION_OF_LIPID_KINASE_ACTIVITY	GOBP_POSITIVE_REGULATION_OF_LIPID_KINASE_ACTIVITY	0.00189867	0.0305043	0.0235052	TGFB1/NOD2	2	Adipose_Subcutaneous	rs34238187
GOBP_CELLULAR_RESPONSE_TO_EXTERNAL_STIMULUS	GOBP_CELLULAR_RESPONSE_TO_EXTERNAL_STIMULUS	0.00193331	0.0308061	0.0237868	AQP3/ZC3H12A/VDR/PRKAG1	4	Adipose_Subcutaneous	rs34238187
GOBP_POSITIVE_REGULATION_OF_B_CELL_MEDIATED_IMMUNITY	GOBP_POSITIVE_REGULATION_OF_B_CELL_MEDIATED_IMMUNITY	0.00200191	0.0314077	0.0244485	TGFB1/NOD2	2	Adipose_Subcutaneous	rs34238187
GOBP_REGULATION_OF_PEPTIDYL_SERINE_PHOSPHORYLATION	GOBP_REGULATION_OF_PEPTIDYL_SERINE_PHOSPHORYLATION	0.00200337	0.0314077	0.0244485	TGFB1/OSM/BAX	3	Adipose_Subcutaneous	rs34238187
GOBP_ERBB_SIGNALING_PATHWAY	GOBP_ERBB_SIGNALING_PATHWAY	0.00208407	0.032276	0.0251269	TGFB1/MVP/PLAUR	3	Adipose_Subcutaneous	rs34238187
GOMF_HSP70_PROTEIN_BINDING	GOMF_HSP70_PROTEIN_BINDING	0.00210776	0.032276	0.0252101	NOD2/BAX	2	Adipose_Subcutaneous	rs34238187
GOBP_MACROAUTOPHAGY	GOBP_MACROAUTOPHAGY	0.00212471	0.032276	0.0252173	GPSM1/NOD2/TCIRG1/PRKAG1	4	Adipose_Subcutaneous	rs34238187
GOBP_REGULATION_OF_T_CELL_DIFFERENTIATION	GOBP_REGULATION_OF_T_CELL_DIFFERENTIATION	0.00212517	0.032276	0.0252173	ADAM8/ZC3H12A/RUNX3	3	Adipose_Subcutaneous	rs34238187
GOBP_LEUKOCYTE_PROLIFERATION	GOBP_LEUKOCYTE_PROLIFERATION	0.00214952	0.0323928	0.025456	RASAL3/TCIRG1/BAX/CD300A	4	Adipose_Subcutaneous	rs34238187
GOBP_POSITIVE_REGULATION_OF_PROTEIN_IMPORT	GOBP_POSITIVE_REGULATION_OF_PROTEIN_IMPORT	0.00221622	0.032888	0.0258884	ZC3H12A/TGFB1	2	Adipose_Subcutaneous	rs34238187
GOBP_REGULATION_OF_T_CELL_RECEPTOR_SIGNALING_PATHWAY	GOBP_REGULATION_OF_T_CELL_RECEPTOR_SIGNALING_PATHWAY	0.00221622	0.032888	0.0258884	TRAT1/CD300A	2	Adipose_Subcutaneous	rs34238187
GOBP_ANTIGEN_RECEPTOR_MEDIATED_SIGNALING_PATHWAY	GOBP_ANTIGEN_RECEPTOR_MEDIATED_SIGNALING_PATHWAY	0.00225078	0.0331478	0.026241	ZC3H12A/TRAT1/BAX/CD300A	4	Adipose_Subcutaneous	rs34238187
GOBP_NEGATIVE_REGULATION_OF_IMMUNE_RESPONSE	GOBP_NEGATIVE_REGULATION_OF_IMMUNE_RESPONSE	0.0022946	0.0332888	0.0267001	ZC3H12A/NOD2/CD300A	3	Adipose_Subcutaneous	rs34238187
GOBP_NEGATIVE_REGULATION_OF_INTERFERON_GAMMA_PRODUCTION	GOBP_NEGATIVE_REGULATION_OF_INTERFERON_GAMMA_PRODUCTION	0.00232727	0.0332888	0.0268385	ZC3H12A/NOD2	2	Adipose_Subcutaneous	rs34238187
GOBP_REGULATION_OF_MAST_CELL_ACTIVATION	GOBP_REGULATION_OF_MAST_CELL_ACTIVATION	0.00232727	0.0332888	0.0268385	STXBP2/CD300A	2	Adipose_Subcutaneous	rs34238187
GOBP_ERK1_AND_ERK2_CASCADE	GOBP_ERK1_AND_ERK2_CASCADE	0.00232884	0.0332888	0.0268385	C5AR1/TGFB1/TPBG/NOD2	4	Adipose_Subcutaneous	rs34238187
GOBP_NEGATIVE_REGULATION_OF_LYMPHOCYTE_ACTIVATION	GOBP_NEGATIVE_REGULATION_OF_LYMPHOCYTE_ACTIVATION	0.00242702	0.0343281	0.027704	ZC3H12A/RUNX3/CD300A	3	Adipose_Subcutaneous	rs34238187
GOBP_REGULATION_OF_KERATINOCYTE_DIFFERENTIATION	GOBP_REGULATION_OF_KERATINOCYTE_DIFFERENTIATION	0.0024409	0.0343281	0.027757	AQP3/VDR	2	Adipose_Subcutaneous	rs34238187
GOBP_ACTIVATION_OF_MAPK_ACTIVITY	GOBP_ACTIVATION_OF_MAPK_ACTIVITY	0.00247219	0.0343281	0.0279014	C5AR1/GNG3/NOD2	3	Adipose_Subcutaneous	rs34238187
GOBP_POSITIVE_REGULATION_OF_HEMOPOIESIS	GOBP_POSITIVE_REGULATION_OF_HEMOPOIESIS	0.00247219	0.0343281	0.0279014	ADAM8/TGFB1/RUNX3	3	Adipose_Subcutaneous	rs34238187
GOBP_REGULATION_OF_LEUKOCYTE_DEGRANULATION	GOBP_REGULATION_OF_LEUKOCYTE_DEGRANULATION	0.00255711	0.0348571	0.0285098	STXBP2/CD300A	2	Adipose_Subcutaneous	rs34238187
REACTOME_VASOPRESSIN_REGULATES_RENAL_WATER_HOMEOSTASIS_VIA_AQUAPORINS	REACTOME_VASOPRESSIN_REGULATES_RENAL_WATER_HOMEOSTASIS_VIA_AQUAPORINS	0.00255711	0.0348571	0.0285098	AQP3/GNG3	2	Adipose_Subcutaneous	rs34238187
GOBP_PALLIUM_DEVELOPMENT	GOBP_PALLIUM_DEVELOPMENT	0.00256408	0.0348571	0.0285098	KIF14/MBOAT7/BAX	3	Adipose_Subcutaneous	rs34238187
GOBP_REGULATION_OF_RELEASE_OF_CYTOCHROME_C_FROM_MITOCHONDRIA	GOBP_REGULATION_OF_RELEASE_OF_CYTOCHROME_C_FROM_MITOCHONDRIA	0.00267588	0.0361244	0.0288708	PLAUR/BAX	2	Adipose_Subcutaneous	rs34238187
GOBP_PEPTIDYL_SERINE_MODIFICATION	GOBP_PEPTIDYL_SERINE_MODIFICATION	0.00271795	0.0362519	0.0288708	TGFB1/RPS6KA1/OSM/BAX	4	Adipose_Subcutaneous	rs34238187
GOBP_NEGATIVE_REGULATION_OF_EPITHELIAL_CELL_PROLIFERATION	GOBP_NEGATIVE_REGULATION_OF_EPITHELIAL_CELL_PROLIFERATION	0.00275415	0.0362519	0.0288708	TGFB1/VDR/RUNX3	3	Adipose_Subcutaneous	rs34238187
GOBP_REGULATION_OF_MACROAUTOPHAGY	GOBP_REGULATION_OF_MACROAUTOPHAGY	0.00275415	0.0362519	0.0288708	GPSM1/NOD2/PRKAG1	3	Adipose_Subcutaneous	rs34238187
GOBP_BLOOD_VESSEL_REMODELING	GOBP_BLOOD_VESSEL_REMODELING	0.00279721	0.0362519	0.0288708	TGFB1/BAX	2	Adipose_Subcutaneous	rs34238187
GOBP_NEGATIVE_REGULATION_OF_TOLL_LIKE_RECEPTOR_SIGNALING_PATHWAY	GOBP_NEGATIVE_REGULATION_OF_TOLL_LIKE_RECEPTOR_SIGNALING_PATHWAY	0.00279721	0.0362519	0.0288708	NOD2/CD300A	2	Adipose_Subcutaneous	rs34238187
GOBP_POSITIVE_REGULATION_OF_PROTEIN_DEPHOSPHORYLATION	GOBP_POSITIVE_REGULATION_OF_PROTEIN_DEPHOSPHORYLATION	0.00279721	0.0362519	0.0288708	TGFB1/CD300A	2	Adipose_Subcutaneous	rs34238187
GOBP_IMPORT_INTO_NUCLEUS	GOBP_IMPORT_INTO_NUCLEUS	0.00290226	0.0373592	0.0288708	ZC3H12A/TGFB1/PRKAG1	3	Adipose_Subcutaneous	rs34238187
GOBP_NEGATIVE_REGULATION_OF_LEUKOCYTE_MIGRATION	GOBP_NEGATIVE_REGULATION_OF_LEUKOCYTE_MIGRATION	0.00292109	0.0373592	0.0288708	RIN3/CD300A	2	Adipose_Subcutaneous	rs34238187
GOBP_NEURON_DEATH	GOBP_NEURON_DEATH	0.00295922	0.0375995	0.0288708	C5AR1/ADAM8/KIF14/BAX	4	Adipose_Subcutaneous	rs34238187
GOBP_RESPONSE_TO_NUTRIENT	GOBP_RESPONSE_TO_NUTRIENT	0.00300367	0.0379165	0.0288708	AQP3/VDR/NOD2	3	Adipose_Subcutaneous	rs34238187
GOBP_MAST_CELL_ACTIVATION_INVOLVED_IN_IMMUNE_RESPONSE	GOBP_MAST_CELL_ACTIVATION_INVOLVED_IN_IMMUNE_RESPONSE	0.00304751	0.0379767	0.0288708	STXBP2/CD300A	2	Adipose_Subcutaneous	rs34238187
GOBP_NEGATIVE_REGULATION_OF_GTPASE_ACTIVITY	GOBP_NEGATIVE_REGULATION_OF_GTPASE_ACTIVITY	0.00304751	0.0379767	0.0288708	CDC42SE1/GPSM1	2	Adipose_Subcutaneous	rs34238187
GOBP_TUMOR_NECROSIS_FACTOR_SUPERFAMILY_CYTOKINE_PRODUCTION	GOBP_TUMOR_NECROSIS_FACTOR_SUPERFAMILY_CYTOKINE_PRODUCTION	0.00310725	0.0381175	0.0288708	ADAM8/ZC3H12A/NOD2	3	Adipose_Subcutaneous	rs34238187
GOBP_RESPONSE_TO_MOLECULE_OF_BACTERIAL_ORIGIN	GOBP_RESPONSE_TO_MOLECULE_OF_BACTERIAL_ORIGIN	0.00311724	0.0381175	0.0288708	C5AR1/ZC3H12A/TGFB1/NOD2	4	Adipose_Subcutaneous	rs34238187
GOBP_RECEPTOR_METABOLIC_PROCESS	GOBP_RECEPTOR_METABOLIC_PROCESS	0.00315985	0.0381175	0.0288708	TGFB1/TRAT1/RIN3	3	Adipose_Subcutaneous	rs34238187
GOBP_CELLULAR_RESPONSE_TO_GLUCOSE_STARVATION	GOBP_CELLULAR_RESPONSE_TO_GLUCOSE_STARVATION	0.00317646	0.0381175	0.0288708	ZC3H12A/PRKAG1	2	Adipose_Subcutaneous	rs34238187
GOBP_NEGATIVE_REGULATION_OF_MUSCLE_CELL_APOPTOTIC_PROCESS	GOBP_NEGATIVE_REGULATION_OF_MUSCLE_CELL_APOPTOTIC_PROCESS	0.00317646	0.0381175	0.0288708	ZC3H12A/DNMT1	2	Adipose_Subcutaneous	rs34238187
GOBP_REGULATION_OF_ACUTE_INFLAMMATORY_RESPONSE	GOBP_REGULATION_OF_ACUTE_INFLAMMATORY_RESPONSE	0.00317646	0.0381175	0.0288708	ADAM8/OSM	2	Adipose_Subcutaneous	rs34238187
GOBP_POSITIVE_REGULATION_OF_BINDING	GOBP_POSITIVE_REGULATION_OF_BINDING	0.00326669	0.038658	0.0288708	TGFB1/GPSM1/PLAUR	3	Adipose_Subcutaneous	rs34238187
GOBP_REGULATION_OF_ADAPTIVE_IMMUNE_RESPONSE	GOBP_REGULATION_OF_ADAPTIVE_IMMUNE_RESPONSE	0.00326669	0.038658	0.0288708	ZC3H12A/TGFB1/NOD2	3	Adipose_Subcutaneous	rs34238187
GOBP_REGULATION_OF_GRANULOCYTE_CHEMOTAXIS	GOBP_REGULATION_OF_GRANULOCYTE_CHEMOTAXIS	0.00330793	0.038658	0.0288708	C5AR1/NOD2	2	Adipose_Subcutaneous	rs34238187
GOBP_T_CELL_APOPTOTIC_PROCESS	GOBP_T_CELL_APOPTOTIC_PROCESS	0.00330793	0.038658	0.0288708	ADAM8/BAX	2	Adipose_Subcutaneous	rs34238187
GOBP_REGULATION_OF_CELL_DIVISION	GOBP_REGULATION_OF_CELL_DIVISION	0.00332093	0.038658	0.0288708	TGFB1/OSM/KIF14	3	Adipose_Subcutaneous	rs34238187
GOBP_REGULATION_OF_BINDING	GOBP_REGULATION_OF_BINDING	0.00348501	0.0403266	0.0288708	TGFB1/GPSM1/PLAUR/BAX	4	Adipose_Subcutaneous	rs34238187
GOBP_REGULATION_OF_LYMPHOCYTE_DIFFERENTIATION	GOBP_REGULATION_OF_LYMPHOCYTE_DIFFERENTIATION	0.00354342	0.0406808	0.0288708	ADAM8/ZC3H12A/RUNX3	3	Adipose_Subcutaneous	rs34238187
GOBP_EMBRYONIC_DIGIT_MORPHOGENESIS	GOBP_EMBRYONIC_DIGIT_MORPHOGENESIS	0.0035784	0.0406808	0.0288708	CHST11/BAX	2	Adipose_Subcutaneous	rs34238187
GOBP_REGULATION_OF_CD4_POSITIVE_ALPHA_BETA_T_CELL_DIFFERENTIATION	GOBP_REGULATION_OF_CD4_POSITIVE_ALPHA_BETA_T_CELL_DIFFERENTIATION	0.0035784	0.0406808	0.0288708	ZC3H12A/RUNX3	2	Adipose_Subcutaneous	rs34238187
GOBP_NEGATIVE_REGULATION_OF_ADAPTIVE_IMMUNE_RESPONSE	GOBP_NEGATIVE_REGULATION_OF_ADAPTIVE_IMMUNE_RESPONSE	0.00371739	0.0412949	0.0288708	ZC3H12A/NOD2	2	Adipose_Subcutaneous	rs34238187
GOBP_NEGATIVE_REGULATION_OF_COAGULATION	GOBP_NEGATIVE_REGULATION_OF_COAGULATION	0.00371739	0.0412949	0.0288708	SERPINB2/PLAUR	2	Adipose_Subcutaneous	rs34238187
GOBP_REGULATION_OF_MYELOID_LEUKOCYTE_MEDIATED_IMMUNITY	GOBP_REGULATION_OF_MYELOID_LEUKOCYTE_MEDIATED_IMMUNITY	0.00371739	0.0412949	0.0288708	STXBP2/CD300A	2	Adipose_Subcutaneous	rs34238187
REACTOME_AQUAPORIN_MEDIATED_TRANSPORT	REACTOME_AQUAPORIN_MEDIATED_TRANSPORT	0.00371739	0.0412949	0.0288708	AQP3/GNG3	2	Adipose_Subcutaneous	rs34238187
GOBP_NEGATIVE_REGULATION_OF_ENDOCYTOSIS	GOBP_NEGATIVE_REGULATION_OF_ENDOCYTOSIS	0.00385886	0.042382	0.0288708	RIN3/CD300A	2	Adipose_Subcutaneous	rs34238187
GOBP_NEGATIVE_REGULATION_OF_LEUKOCYTE_MEDIATED_IMMUNITY	GOBP_NEGATIVE_REGULATION_OF_LEUKOCYTE_MEDIATED_IMMUNITY	0.00385886	0.042382	0.0288708	NOD2/CD300A	2	Adipose_Subcutaneous	rs34238187
GOBP_REGULATION_OF_B_CELL_MEDIATED_IMMUNITY	GOBP_REGULATION_OF_B_CELL_MEDIATED_IMMUNITY	0.0040028	0.0434718	0.0288708	TGFB1/NOD2	2	Adipose_Subcutaneous	rs34238187
GOBP_REGULATION_OF_LYMPHOCYTE_APOPTOTIC_PROCESS	GOBP_REGULATION_OF_LYMPHOCYTE_APOPTOTIC_PROCESS	0.0040028	0.0434718	0.0288708	ADAM8/BAX	2	Adipose_Subcutaneous	rs34238187
GOBP_CARTILAGE_DEVELOPMENT	GOBP_CARTILAGE_DEVELOPMENT	0.00407679	0.0440293	0.0288708	TGFB1/RUNX3/CHST11	3	Adipose_Subcutaneous	rs34238187
GOBP_NEGATIVE_REGULATION_OF_LYMPHOCYTE_DIFFERENTIATION	GOBP_NEGATIVE_REGULATION_OF_LYMPHOCYTE_DIFFERENTIATION	0.00414922	0.0440769	0.0288708	ZC3H12A/RUNX3	2	Adipose_Subcutaneous	rs34238187
GOBP_RELEASE_OF_CYTOCHROME_C_FROM_MITOCHONDRIA	GOBP_RELEASE_OF_CYTOCHROME_C_FROM_MITOCHONDRIA	0.00414922	0.0440769	0.0288708	PLAUR/BAX	2	Adipose_Subcutaneous	rs34238187
REACTOME_REGULATION_OF_RUNX3_EXPRESSION_AND_ACTIVITY	REACTOME_REGULATION_OF_RUNX3_EXPRESSION_AND_ACTIVITY	0.00414922	0.0440769	0.0288708	TGFB1/RUNX3	2	Adipose_Subcutaneous	rs34238187
GOBP_REGULATION_OF_B_CELL_ACTIVATION	GOBP_REGULATION_OF_B_CELL_ACTIVATION	0.00420157	0.0443905	0.0288708	TGFB1/NOD2/CD300A	3	Adipose_Subcutaneous	rs34238187
GOBP_POSITIVE_REGULATION_OF_DNA_BINDING	GOBP_POSITIVE_REGULATION_OF_DNA_BINDING	0.00429809	0.0446818	0.0288708	TGFB1/PLAUR	2	Adipose_Subcutaneous	rs34238187
GOBP_POSITIVE_REGULATION_OF_OXIDOREDUCTASE_ACTIVITY	GOBP_POSITIVE_REGULATION_OF_OXIDOREDUCTASE_ACTIVITY	0.00429809	0.0446818	0.0288708	VDR/NOD2	2	Adipose_Subcutaneous	rs34238187
GOBP_PRODUCTION_OF_SMALL_RNA_INVOLVED_IN_GENE_SILENCING_BY_RNA	GOBP_PRODUCTION_OF_SMALL_RNA_INVOLVED_IN_GENE_SILENCING_BY_RNA	0.00429809	0.0446818	0.0288708	ZC3H12A/TGFB1	2	Adipose_Subcutaneous	rs34238187
GOBP_LYMPHOCYTE_HOMEOSTASIS	GOBP_LYMPHOCYTE_HOMEOSTASIS	0.00444942	0.0457654	0.0288708	TCIRG1/BAX	2	Adipose_Subcutaneous	rs34238187
GOBP_REGULATION_OF_PHOSPHATIDYLINOSITOL_3_KINASE_ACTIVITY	GOBP_REGULATION_OF_PHOSPHATIDYLINOSITOL_3_KINASE_ACTIVITY	0.00444942	0.0457654	0.0288708	TGFB1/NOD2	2	Adipose_Subcutaneous	rs34238187
REACTOME_IMMUNOREGULATORY_INTERACTIONS_BETWEEN_A_LYMPHOID_AND_A_NON_LYMPHOID_CELL	REACTOME_IMMUNOREGULATORY_INTERACTIONS_BETWEEN_A_LYMPHOID_AND_A_NON_LYMPHOID_CELL	0.00452363	0.0462839	0.0288708	OSCAR/HCST/CD300A	3	Adipose_Subcutaneous	rs34238187
GOBP_NEGATIVE_REGULATION_OF_PEPTIDYL_TYROSINE_PHOSPHORYLATION	GOBP_NEGATIVE_REGULATION_OF_PEPTIDYL_TYROSINE_PHOSPHORYLATION	0.00460318	0.0466072	0.0288708	MVP/CD300A	2	Adipose_Subcutaneous	rs34238187
GOBP_POSITIVE_REGULATION_OF_DEPHOSPHORYLATION	GOBP_POSITIVE_REGULATION_OF_DEPHOSPHORYLATION	0.00460318	0.0466072	0.0288708	TGFB1/CD300A	2	Adipose_Subcutaneous	rs34238187
GOBP_POSITIVE_REGULATION_OF_PEPTIDYL_TYROSINE_PHOSPHORYLATION	GOBP_POSITIVE_REGULATION_OF_PEPTIDYL_TYROSINE_PHOSPHORYLATION	0.00465653	0.0469031	0.0288708	TGFB1/OSM/NOD2	3	Adipose_Subcutaneous	rs34238187
GOBP_REGULATION_OF_PROTEIN_IMPORT	GOBP_REGULATION_OF_PROTEIN_IMPORT	0.00475939	0.047692	0.0288708	ZC3H12A/TGFB1	2	Adipose_Subcutaneous	rs34238187
GOBP_MAST_CELL_ACTIVATION	GOBP_MAST_CELL_ACTIVATION	0.00491801	0.0487201	0.0288708	STXBP2/CD300A	2	Adipose_Subcutaneous	rs34238187
GOBP_POSITIVE_REGULATION_OF_MACROAUTOPHAGY	GOBP_POSITIVE_REGULATION_OF_MACROAUTOPHAGY	0.00491801	0.0487201	0.0288708	GPSM1/NOD2	2	Adipose_Subcutaneous	rs34238187
GOBP_NEGATIVE_REGULATION_OF_RESPONSE_TO_EXTERNAL_STIMULUS	GOBP_NEGATIVE_REGULATION_OF_RESPONSE_TO_EXTERNAL_STIMULUS	0.00493717	0.0487201	0.0288708	SERPINB2/NOD2/RIN3/PLAUR	4	Adipose_Subcutaneous	rs34238187
GOBP_MEMBRANE_PROTEIN_PROTEOLYSIS	GOBP_MEMBRANE_PROTEIN_PROTEOLYSIS	0.00507906	0.0496165	0.0288708	ADAM8/TGFB1	2	Adipose_Subcutaneous	rs34238187
GOBP_POSITIVE_REGULATION_OF_NUCLEOCYTOPLASMIC_TRANSPORT	GOBP_POSITIVE_REGULATION_OF_NUCLEOCYTOPLASMIC_TRANSPORT	0.00507906	0.0496165	0.0288708	ZC3H12A/TGFB1	2	Adipose_Subcutaneous	rs34238187
GOBP_NEGATIVE_REGULATION_OF_CELL_ACTIVATION	GOBP_NEGATIVE_REGULATION_OF_CELL_ACTIVATION	0.00514022	0.0499629	0.0288708	ZC3H12A/RUNX3/CD300A	3	Adipose_Subcutaneous	rs34238187
GOBP_OLIGOSACCHARIDE_METABOLIC_PROCESS	GOBP_OLIGOSACCHARIDE_METABOLIC_PROCESS	8.69517e-05	0.0109695	0.013017	B3GALT1/NEU3	2	Adipose_Visceral_Omentum	rs34238187
GOBP_GLYCOSPHINGOLIPID_METABOLIC_PROCESS	GOBP_GLYCOSPHINGOLIPID_METABOLIC_PROCESS	0.000124654	0.0109695	0.013017	B3GALT1/NEU3	2	Adipose_Visceral_Omentum	rs34238187
GOBP_CERAMIDE_METABOLIC_PROCESS	GOBP_CERAMIDE_METABOLIC_PROCESS	0.000289048	0.0153271	0.013017	B3GALT1/NEU3	2	Adipose_Visceral_Omentum	rs34238187
GOBP_LIPOSACCHARIDE_METABOLIC_PROCESS	GOBP_LIPOSACCHARIDE_METABOLIC_PROCESS	0.000348343	0.0153271	0.013017	B3GALT1/NEU3	2	Adipose_Visceral_Omentum	rs34238187
GOBP_SPHINGOLIPID_METABOLIC_PROCESS	GOBP_SPHINGOLIPID_METABOLIC_PROCESS	0.000771058	0.0271412	0.0184312	B3GALT1/NEU3	2	Adipose_Visceral_Omentum	rs34238187
GOBP_MEMBRANE_LIPID_METABOLIC_PROCESS	GOBP_MEMBRANE_LIPID_METABOLIC_PROCESS	0.00127151	0.0355825	0.0184312	B3GALT1/NEU3	2	Adipose_Visceral_Omentum	rs34238187
GOMF_TRANSFERASE_ACTIVITY_TRANSFERRING_GLYCOSYL_GROUPS	GOMF_TRANSFERASE_ACTIVITY_TRANSFERRING_GLYCOSYL_GROUPS	0.00203619	0.0355825	0.0184312	B3GALT1/B3GNTL1	2	Adipose_Visceral_Omentum	rs34238187
GOBP_UROGENITAL_SYSTEM_DEVELOPMENT	GOBP_UROGENITAL_SYSTEM_DEVELOPMENT	0.000107498	0.0366568	0.0258561	FOXA1/UPK3A/PCSK9	3	Artery_Coronary	rs34238187
GOBP_CORNIFICATION	GOBP_CORNIFICATION	0.000518109	0.0414456	0.044136	KRT16/KRT23	2	Artery_Coronary	rs34238187
REACTOME_FORMATION_OF_THE_CORNIFIED_ENVELOPE	REACTOME_FORMATION_OF_THE_CORNIFIED_ENVELOPE	0.000674155	0.0414456	0.044136	KRT16/KRT23	2	Artery_Coronary	rs34238187
GOBP_VACUOLAR_TRANSPORT	GOBP_VACUOLAR_TRANSPORT	0.00094569	0.0414456	0.044136	PCSK9/LEPROTL1	2	Artery_Coronary	rs34238187
REACTOME_KERATINIZATION	REACTOME_KERATINIZATION	0.00188569	0.0414456	0.044136	KRT16/KRT23	2	Artery_Coronary	rs34238187
GOBP_KERATINIZATION	GOBP_KERATINIZATION	0.00202491	0.0414456	0.044136	KRT16/KRT23	2	Artery_Coronary	rs34238187
GOBP_KERATINOCYTE_DIFFERENTIATION	GOBP_KERATINOCYTE_DIFFERENTIATION	0.00360535	0.0414456	0.044136	KRT16/KRT23	2	Artery_Coronary	rs34238187
GOBP_EPIDERMAL_CELL_DIFFERENTIATION	GOBP_EPIDERMAL_CELL_DIFFERENTIATION	0.00507636	0.0414456	0.044136	KRT16/KRT23	2	Artery_Coronary	rs34238187
GOBP_REGULATION_OF_ACTIN_FILAMENT_BASED_PROCESS	GOBP_REGULATION_OF_ACTIN_FILAMENT_BASED_PROCESS	0.00589967	0.0414456	0.044136	WASF3/FZD10	2	Artery_Coronary	rs34238187
GOBP_GLAND_DEVELOPMENT	GOBP_GLAND_DEVELOPMENT	0.00662443	0.0414456	0.044136	FOXA1/PCSK9	2	Artery_Coronary	rs34238187
GOBP_SKIN_DEVELOPMENT	GOBP_SKIN_DEVELOPMENT	0.00668658	0.0414456	0.044136	KRT16/KRT23	2	Artery_Coronary	rs34238187
GOBP_EPIDERMIS_DEVELOPMENT	GOBP_EPIDERMIS_DEVELOPMENT	0.00825826	0.0414456	0.044136	KRT16/KRT23	2	Artery_Coronary	rs34238187
GOBP_PROTEIN_LOCALIZATION_TO_PLASMA_MEMBRANE	GOBP_PROTEIN_LOCALIZATION_TO_PLASMA_MEMBRANE	0.000139803	0.0264148	0.0278624	ZDHHC7/RAB13/PPP2R5A	3	Artery_Tibial	rs34238187
GOBP_PROTEIN_LOCALIZATION_TO_CELL_PERIPHERY	GOBP_PROTEIN_LOCALIZATION_TO_CELL_PERIPHERY	0.000236904	0.0264148	0.0368852	ZDHHC7/RAB13/PPP2R5A	3	Artery_Tibial	rs34238187
GOBP_REGULATION_OF_PROTEIN_LOCALIZATION_TO_PLASMA_MEMBRANE	GOBP_REGULATION_OF_PROTEIN_LOCALIZATION_TO_PLASMA_MEMBRANE	0.000643005	0.0477967	0.0368852	ZDHHC7/PPP2R5A	2	Artery_Tibial	rs34238187
REACTOME_SUPPRESSION_OF_PHAGOSOMAL_MATURATION	REACTOME_SUPPRESSION_OF_PHAGOSOMAL_MATURATION	7.25504e-05	0.0198307	0.0150042	HGS/RPS27A	2	Brain_Amygdala	rs34238187
REACTOME_IRAK1_RECRUITS_IKK_COMPLEX	REACTOME_IRAK1_RECRUITS_IKK_COMPLEX	8.45897e-05	0.0198307	0.0150042	PELI2/RPS27A	2	Brain_Amygdala	rs34238187
GOBP_ENDOSOMAL_TRANSPORT	GOBP_ENDOSOMAL_TRANSPORT	9.29475e-05	0.0198307	0.0150042	HGS/AP5B1/GBF1/RPS27A	4	Brain_Amygdala	rs34238187
GOBP_RIBONUCLEOPROTEIN_COMPLEX_BIOGENESIS	GOBP_RIBONUCLEOPROTEIN_COMPLEX_BIOGENESIS	9.41013e-05	0.0198307	0.0150042	ESF1/PRPF8/YTHDC1/URB1/DHX30	5	Brain_Amygdala	rs34238187
REACTOME_INLB_MEDIATED_ENTRY_OF_LISTERIA_MONOCYTOGENES_INTO_HOST_CELL	REACTOME_INLB_MEDIATED_ENTRY_OF_LISTERIA_MONOCYTOGENES_INTO_HOST_CELL	9.7543e-05	0.0198307	0.0150042	HGS/RPS27A	2	Brain_Amygdala	rs34238187
GOMF_U6_SNRNA_BINDING	GOMF_U6_SNRNA_BINDING	0.000111409	0.0198307	0.016423	PRPF8/LARP7	2	Brain_Amygdala	rs34238187
REACTOME_LISTERIA_MONOCYTOGENES_ENTRY_INTO_HOST_CELLS	REACTOME_LISTERIA_MONOCYTOGENES_ENTRY_INTO_HOST_CELLS	0.00017596	0.0227066	0.0222332	HGS/RPS27A	2	Brain_Amygdala	rs34238187
REACTOME_NEGATIVE_REGULATION_OF_MET_ACTIVITY	REACTOME_NEGATIVE_REGULATION_OF_MET_ACTIVITY	0.000194362	0.0227066	0.0237115	HGS/RPS27A	2	Brain_Amygdala	rs34238187
GOBP_NUCLEOTIDE_EXCISION_REPAIR_DNA_DUPLEX_UNWINDING	GOBP_NUCLEOTIDE_EXCISION_REPAIR_DNA_DUPLEX_UNWINDING	0.000213666	0.0227066	0.0243847	RPS27A/DDB1	2	Brain_Amygdala	rs34238187
GOBP_NUCLEOTIDE_EXCISION_REPAIR_DNA_DAMAGE_RECOGNITION	GOBP_NUCLEOTIDE_EXCISION_REPAIR_DNA_DAMAGE_RECOGNITION	0.00023387	0.0227066	0.0250729	RPS27A/DDB1	2	Brain_Amygdala	rs34238187
REACTOME_RESPONSE_OF_MTB_TO_PHAGOCYTOSIS	REACTOME_RESPONSE_OF_MTB_TO_PHAGOCYTOSIS	0.00023387	0.0227066	0.0250729	HGS/RPS27A	2	Brain_Amygdala	rs34238187
GOBP_GLOBAL_GENOME_NUCLEOTIDE_EXCISION_REPAIR	GOBP_GLOBAL_GENOME_NUCLEOTIDE_EXCISION_REPAIR	0.000299868	0.0253778	0.028673	RPS27A/DDB1	2	Brain_Amygdala	rs34238187
REACTOME_INFECTION_WITH_MYCOBACTERIUM_TUBERCULOSIS	REACTOME_INFECTION_WITH_MYCOBACTERIUM_TUBERCULOSIS	0.000323657	0.0253778	0.0301333	HGS/RPS27A	2	Brain_Amygdala	rs34238187
GOBP_NUCLEOTIDE_EXCISION_REPAIR_PREINCISION_COMPLEX_ASSEMBLY	GOBP_NUCLEOTIDE_EXCISION_REPAIR_PREINCISION_COMPLEX_ASSEMBLY	0.000373909	0.0253778	0.0308003	RPS27A/DDB1	2	Brain_Amygdala	rs34238187
REACTOME_RECOGNITION_OF_DNA_DAMAGE_BY_PCNA_CONTAINING_REPLICATION_COMPLEX	REACTOME_RECOGNITION_OF_DNA_DAMAGE_BY_PCNA_CONTAINING_REPLICATION_COMPLEX	0.000400369	0.0253778	0.0308003	RPS27A/DDB1	2	Brain_Amygdala	rs34238187
GOBP_FATTY_ACYL_COA_BIOSYNTHETIC_PROCESS	GOBP_FATTY_ACYL_COA_BIOSYNTHETIC_PROCESS	0.000427715	0.0253778	0.0308003	ACLY/FASN	2	Brain_Amygdala	rs34238187
REACTOME_EGFR_DOWNREGULATION	REACTOME_EGFR_DOWNREGULATION	0.000427715	0.0253778	0.0308003	HGS/RPS27A	2	Brain_Amygdala	rs34238187
REACTOME_ENDOSOMAL_SORTING_COMPLEX_REQUIRED_FOR_TRANSPORT_ESCRT	REACTOME_ENDOSOMAL_SORTING_COMPLEX_REQUIRED_FOR_TRANSPORT_ESCRT	0.000427715	0.0253778	0.0308003	HGS/RPS27A	2	Brain_Amygdala	rs34238187
GOBP_ALCOHOL_BIOSYNTHETIC_PROCESS	GOBP_ALCOHOL_BIOSYNTHETIC_PROCESS	0.000487363	0.0273949	0.0308003	ACLY/FASN/DHFR	3	Brain_Amygdala	rs34238187
REACTOME_FATTY_ACYL_COA_BIOSYNTHESIS	REACTOME_FATTY_ACYL_COA_BIOSYNTHESIS	0.000610327	0.0301807	0.0308003	ACLY/FASN	2	Brain_Amygdala	rs34238187
GOBP_ACETYL_COA_METABOLIC_PROCESS	GOBP_ACETYL_COA_METABOLIC_PROCESS	0.000643836	0.0301807	0.0308003	ACLY/FASN	2	Brain_Amygdala	rs34238187
REACTOME_DNA_DAMAGE_RECOGNITION_IN_GG_NER	REACTOME_DNA_DAMAGE_RECOGNITION_IN_GG_NER	0.000643836	0.0301807	0.0308003	RPS27A/DDB1	2	Brain_Amygdala	rs34238187
GOBP_DNA_DAMAGE_RESPONSE_DETECTION_OF_DNA_DAMAGE	GOBP_DNA_DAMAGE_RESPONSE_DETECTION_OF_DNA_DAMAGE	0.000678218	0.0301807	0.0308003	RPS27A/DDB1	2	Brain_Amygdala	rs34238187
GOBP_NUCLEOTIDE_EXCISION_REPAIR_DNA_INCISION	GOBP_NUCLEOTIDE_EXCISION_REPAIR_DNA_INCISION	0.000678218	0.0301807	0.0308003	RPS27A/DDB1	2	Brain_Amygdala	rs34238187
REACTOME_DUAL_INCISION_IN_GG_NER	REACTOME_DUAL_INCISION_IN_GG_NER	0.000749596	0.031114	0.0308003	RPS27A/DDB1	2	Brain_Amygdala	rs34238187
GOBP_FATTY_ACYL_COA_METABOLIC_PROCESS	GOBP_FATTY_ACYL_COA_METABOLIC_PROCESS	0.000786589	0.031114	0.0308003	ACLY/FASN	2	Brain_Amygdala	rs34238187
REACTOME_ACTIVATION_OF_GENE_EXPRESSION_BY_SREBF_SREBP	REACTOME_ACTIVATION_OF_GENE_EXPRESSION_BY_SREBF_SREBP	0.000786589	0.031114	0.0308003	FASN/CARM1	2	Brain_Amygdala	rs34238187
REACTOME_FORMATION_OF_INCISION_COMPLEX_IN_GG_NER	REACTOME_FORMATION_OF_INCISION_COMPLEX_IN_GG_NER	0.000824449	0.0314468	0.0308003	RPS27A/DDB1	2	Brain_Amygdala	rs34238187
REACTOME_DNA_DAMAGE_BYPASS	REACTOME_DNA_DAMAGE_BYPASS	0.0010267	0.0378107	0.0310456	RPS27A/DDB1	2	Brain_Amygdala	rs34238187
REACTOME_SIGNALING_BY_EGFR	REACTOME_SIGNALING_BY_EGFR	0.00111361	0.0379271	0.0328318	HGS/RPS27A	2	Brain_Amygdala	rs34238187
GOBP_REGULATION_OF_DNA_TEMPLATED_TRANSCRIPTION_ELONGATION	GOBP_REGULATION_OF_DNA_TEMPLATED_TRANSCRIPTION_ELONGATION	0.00120393	0.0379271	0.0343498	LARP7/CCAR2	2	Brain_Amygdala	rs34238187
GOMF_SNRNA_BINDING	GOMF_SNRNA_BINDING	0.00120393	0.0379271	0.0343498	PRPF8/LARP7	2	Brain_Amygdala	rs34238187
GOBP_RNA_SPLICING	GOBP_RNA_SPLICING	0.00121372	0.0379271	0.0343521	PRPF8/YTHDC1/LARP7/CCAR2	4	Brain_Amygdala	rs34238187
GOBP_THIOESTER_BIOSYNTHETIC_PROCESS	GOBP_THIOESTER_BIOSYNTHETIC_PROCESS	0.00125037	0.0379271	0.0348321	ACLY/FASN	2	Brain_Amygdala	rs34238187
REACTOME_FORMATION_OF_TC_NER_PRE_INCISION_COMPLEX	REACTOME_FORMATION_OF_TC_NER_PRE_INCISION_COMPLEX	0.00125037	0.0379271	0.0348321	RPS27A/DDB1	2	Brain_Amygdala	rs34238187
GOMF_NUCLEAR_RECEPTOR_COACTIVATOR_ACTIVITY	GOMF_NUCLEAR_RECEPTOR_COACTIVATOR_ACTIVITY	0.00129766	0.0379271	0.035589	CARM1/CCAR2	2	Brain_Amygdala	rs34238187
REACTOME_REGULATION_OF_CHOLESTEROL_BIOSYNTHESIS_BY_SREBP_SREBF	REACTOME_REGULATION_OF_CHOLESTEROL_BIOSYNTHESIS_BY_SREBP_SREBF	0.00134579	0.0379271	0.0364448	FASN/CARM1	2	Brain_Amygdala	rs34238187
GOBP_NCRNA_METABOLIC_PROCESS	GOBP_NCRNA_METABOLIC_PROCESS	0.00134947	0.0379271	0.0364448	ESF1/LARP7/URB1/SND1	4	Brain_Amygdala	rs34238187
GOBP_RIBONUCLEOPROTEIN_COMPLEX_SUBUNIT_ORGANIZATION	GOBP_RIBONUCLEOPROTEIN_COMPLEX_SUBUNIT_ORGANIZATION	0.00147656	0.040435	0.0389844	PRPF8/YTHDC1/DHX30	3	Brain_Amygdala	rs34238187
GOBP_FATTY_ACID_DERIVATIVE_BIOSYNTHETIC_PROCESS	GOBP_FATTY_ACID_DERIVATIVE_BIOSYNTHETIC_PROCESS	0.00170633	0.0455591	0.0440645	ACLY/FASN	2	Brain_Amygdala	rs34238187
REACTOME_DUAL_INCISION_IN_TC_NER	REACTOME_DUAL_INCISION_IN_TC_NER	0.0018734	0.0487689	0.0470064	RPS27A/DDB1	2	Brain_Amygdala	rs34238187
GOBP_ORGANIC_HYDROXY_COMPOUND_BIOSYNTHETIC_PROCESS	GOBP_ORGANIC_HYDROXY_COMPOUND_BIOSYNTHETIC_PROCESS	0.00191788	0.0487689	0.0477835	ACLY/FASN/DHFR	3	Brain_Amygdala	rs34238187
GOBP_NUCLEOSIDE_BISPHOSPHATE_BIOSYNTHETIC_PROCESS	GOBP_NUCLEOSIDE_BISPHOSPHATE_BIOSYNTHETIC_PROCESS	0.00198893	0.0493995	0.0492072	ACLY/FASN	2	Brain_Amygdala	rs34238187
GOBP_CYTOPLASMIC_TRANSLATION	GOBP_CYTOPLASMIC_TRANSLATION	5.11695e-05	0.0293201	0.00664934	EIF4G1/DPH2/EIF4A1	3	Brain_Anterior_cingulate_cortex_BA24	rs34238187
REACTOME_DEADENYLATION_OF_MRNA	REACTOME_DEADENYLATION_OF_MRNA	0.00014189	0.0362627	0.0109198	EIF4G1/EIF4A1	2	Brain_Anterior_cingulate_cortex_BA24	rs34238187
GOBP_CYTOPLASMIC_TRANSLATIONAL_INITIATION	GOBP_CYTOPLASMIC_TRANSLATIONAL_INITIATION	0.000264296	0.0362627	0.0109198	EIF4G1/EIF4A1	2	Brain_Anterior_cingulate_cortex_BA24	rs34238187
GOBP_RIBONUCLEOPROTEIN_COMPLEX_BIOGENESIS	GOBP_RIBONUCLEOPROTEIN_COMPLEX_BIOGENESIS	0.0003171	0.0362627	0.0109198	PRMT5/BUD23/RRP36/PA2G4	4	Brain_Anterior_cingulate_cortex_BA24	rs34238187
GOBP_NCRNA_METABOLIC_PROCESS	GOBP_NCRNA_METABOLIC_PROCESS	0.000373945	0.0362627	0.0109198	CARS1/BUD23/RRP36/PA2G4	4	Brain_Anterior_cingulate_cortex_BA24	rs34238187
GOBP_REGULATION_OF_CELLULAR_AMIDE_METABOLIC_PROCESS	GOBP_REGULATION_OF_CELLULAR_AMIDE_METABOLIC_PROCESS	0.000379714	0.0362627	0.0109651	UPF3A/EIF4G1/DPH2/PA2G4	4	Brain_Anterior_cingulate_cortex_BA24	rs34238187
GOMF_TRANSLATION_INITIATION_FACTOR_ACTIVITY	GOMF_TRANSLATION_INITIATION_FACTOR_ACTIVITY	0.000596245	0.0429486	0.0153427	EIF4G1/EIF4A1	2	Brain_Anterior_cingulate_cortex_BA24	rs34238187
GOBP_RRNA_METABOLIC_PROCESS	GOBP_RRNA_METABOLIC_PROCESS	0.000620204	0.0429486	0.0158027	BUD23/RRP36/PA2G4	3	Brain_Anterior_cingulate_cortex_BA24	rs34238187
REACTOME_DEADENYLATION_DEPENDENT_MRNA_DECAY	REACTOME_DEADENYLATION_DEPENDENT_MRNA_DECAY	0.000718606	0.0429486	0.017574	EIF4G1/EIF4A1	2	Brain_Anterior_cingulate_cortex_BA24	rs34238187
REACTOME_ACTIVATION_OF_THE_MRNA_UPON_BINDING_OF_THE_CAP_BINDING_COMPLEX_AND_EIFS_AND_SUBSEQUENT_BINDING_TO_43S	REACTOME_ACTIVATION_OF_THE_MRNA_UPON_BINDING_OF_THE_CAP_BINDING_COMPLEX_AND_EIFS_AND_SUBSEQUENT_BINDING_TO_43S	0.000824494	0.0429486	0.0193047	EIF4G1/EIF4A1	2	Brain_Anterior_cingulate_cortex_BA24	rs34238187
REACTOME_RRNA_MODIFICATION_IN_THE_NUCLEUS_AND_CYTOSOL	REACTOME_RRNA_MODIFICATION_IN_THE_NUCLEUS_AND_CYTOSOL	0.000824494	0.0429486	0.0193047	BUD23/RRP36	2	Brain_Anterior_cingulate_cortex_BA24	rs34238187
GOBP_THYROID_HORMONE_GENERATION	GOBP_THYROID_HORMONE_GENERATION	4.59139e-07	0.000205935	0.000558458	TPO/PAX8/TG	3	Brain_Cerebellum	rs34238187
GOBP_THYROID_HORMONE_METABOLIC_PROCESS	GOBP_THYROID_HORMONE_METABOLIC_PROCESS	8.95368e-07	0.000205935	0.000689124	TPO/PAX8/TG	3	Brain_Cerebellum	rs34238187
GOBP_PHENOL_CONTAINING_COMPOUND_METABOLIC_PROCESS	GOBP_PHENOL_CONTAINING_COMPOUND_METABOLIC_PROCESS	6.38827e-05	0.00979534	0.0110764	TPO/PAX8/TG	3	Brain_Cerebellum	rs34238187
GOBP_THYROID_GLAND_DEVELOPMENT	GOBP_THYROID_GLAND_DEVELOPMENT	0.000117462	0.0135081	0.0150391	PAX8/TG	2	Brain_Cerebellum	rs34238187
GOBP_CELLULAR_MODIFIED_AMINO_ACID_METABOLIC_PROCESS	GOBP_CELLULAR_MODIFIED_AMINO_ACID_METABOLIC_PROCESS	0.000403356	0.0332635	0.0319834	TPO/PAX8/TG	3	Brain_Cerebellum	rs34238187
KEGG_TYROSINE_METABOLISM	KEGG_TYROSINE_METABOLISM	0.000433872	0.0332635	0.0319834	TPO/GOT1	2	Brain_Cerebellum	rs34238187
GOBP_HORMONE_METABOLIC_PROCESS	GOBP_HORMONE_METABOLIC_PROCESS	0.000533855	0.0350819	0.0371049	TPO/PAX8/TG	3	Brain_Cerebellum	rs34238187
KEGG_AUTOIMMUNE_THYROID_DISEASE	KEGG_AUTOIMMUNE_THYROID_DISEASE	0.000665181	0.0382479	0.0414908	TPO/TG	2	Brain_Cerebellum	rs34238187
REACTOME_NEUREXINS_AND_NEUROLIGINS	REACTOME_NEUREXINS_AND_NEUROLIGINS	2.43456e-08	4.23127e-05	6.81079e-05	HOMER1/DLG2/DLGAP4/SHANK2/DLGAP3/DLG3	6	Brain_Cortex	rs34238187
GOBP_REGULATION_OF_NEUROTRANSMITTER_RECEPTOR_ACTIVITY	GOBP_REGULATION_OF_NEUROTRANSMITTER_RECEPTOR_ACTIVITY	2.28247e-07	0.00015196	0.000293643	HOMER1/DLG2/DLGAP4/SHANK2/DLGAP3/DLG3	6	Brain_Cortex	rs34238187
GOBP_REGULATION_OF_NERVOUS_SYSTEM_PROCESS	GOBP_REGULATION_OF_NERVOUS_SYSTEM_PROCESS	2.79906e-07	0.00015196	0.000293643	RNF10/HOMER1/CST7/CACNB3/DLGAP4/SHANK2/DLGAP3	7	Brain_Cortex	rs34238187
REACTOME_PROTEIN_PROTEIN_INTERACTIONS_AT_SYNAPSES	REACTOME_PROTEIN_PROTEIN_INTERACTIONS_AT_SYNAPSES	3.49735e-07	0.00015196	0.000326133	HOMER1/DLG2/DLGAP4/SHANK2/DLGAP3/DLG3	6	Brain_Cortex	rs34238187
GOBP_REGULATION_OF_TRANS_SYNAPTIC_SIGNALING	GOBP_REGULATION_OF_TRANS_SYNAPTIC_SIGNALING	6.86592e-07	0.000217311	0.000523846	RIMS4/HOMER1/CACNB3/DLGAP4/JPH4/TPRG1L/SHANK2/CAMK2A/DLGAP3/SEPTIN5	10	Brain_Cortex	rs34238187
REACTOME_NEURONAL_SYSTEM	REACTOME_NEURONAL_SYSTEM	7.5021e-07	0.000217311	0.000524687	HOMER1/DLG2/CACNB3/DLGAP4/KCNK3/PANX1/SHANK2/CAMK2A/DLGAP3/DLG3	10	Brain_Cortex	rs34238187
GOMF_GLUTAMATE_RECEPTOR_BINDING	GOMF_GLUTAMATE_RECEPTOR_BINDING	8.59697e-06	0.0021345	0.00244902	HOMER1/SHANK2/CDK5R1/CAMK2A	4	Brain_Cortex	rs34238187
GOMF_ACTIN_BINDING	GOMF_ACTIN_BINDING	1.10614e-05	0.00240309	0.00273042	SYNPO/AFAP1/MYO16/LASP1/PHACTR1/ACTR3B/PANX1/CDK5R1/ENC1	9	Brain_Cortex	rs34238187
GOBP_REGULATION_OF_CATION_TRANSMEMBRANE_TRANSPORT	GOBP_REGULATION_OF_CATION_TRANSMEMBRANE_TRANSPORT	1.29542e-05	0.0025016	0.00310628	HOMER1/DLG2/CACNB3/CHP1/JPH4/SHANK2/DLG3/TMEM38A	8	Brain_Cortex	rs34238187
GOBP_REGULATION_OF_POSTSYNAPTIC_NEUROTRANSMITTER_RECEPTOR_ACTIVITY	GOBP_REGULATION_OF_POSTSYNAPTIC_NEUROTRANSMITTER_RECEPTOR_ACTIVITY	1.64604e-05	0.00286081	0.00363433	HOMER1/DLGAP4/DLGAP3	3	Brain_Cortex	rs34238187
GOBP_REGULATION_OF_PHOSPHATASE_ACTIVITY	GOBP_REGULATION_OF_PHOSPHATASE_ACTIVITY	2.08916e-05	0.00312398	0.00407756	PPP1R16B/DLG2/PHACTR1/CHP1/PPP6R1/DLG3	6	Brain_Cortex	rs34238187
GOBP_REGULATION_OF_CATION_CHANNEL_ACTIVITY	GOBP_REGULATION_OF_CATION_CHANNEL_ACTIVITY	2.15695e-05	0.00312398	0.0041142	HOMER1/DLG2/CACNB3/JPH4/SHANK2/DLG3	6	Brain_Cortex	rs34238187
GOBP_NEGATIVE_REGULATION_OF_DEPHOSPHORYLATION	GOBP_NEGATIVE_REGULATION_OF_DEPHOSPHORYLATION	2.65697e-05	0.00353515	0.00495532	PPP1R16B/DLG2/PHACTR1/CHP1/DLG3	5	Brain_Cortex	rs34238187
GOBP_REGULATION_OF_SIGNALING_RECEPTOR_ACTIVITY	GOBP_REGULATION_OF_SIGNALING_RECEPTOR_ACTIVITY	3.02658e-05	0.00353515	0.00540446	HOMER1/DLG2/DLGAP4/SHANK2/DLGAP3/DLG3	6	Brain_Cortex	rs34238187
REACTOME_RAS_ACTIVATION_UPON_CA2_INFLUX_THROUGH_NMDA_RECEPTOR	REACTOME_RAS_ACTIVATION_UPON_CA2_INFLUX_THROUGH_NMDA_RECEPTOR	3.32019e-05	0.00353515	0.00560696	DLG2/CAMK2A/DLG3	3	Brain_Cortex	rs34238187
GOBP_REGULATION_OF_TRANSPORTER_ACTIVITY	GOBP_REGULATION_OF_TRANSPORTER_ACTIVITY	3.33847e-05	0.00353515	0.00560696	HOMER1/DLG2/CACNB3/CHP1/JPH4/SHANK2/DLG3	7	Brain_Cortex	rs34238187
GOMF_PHOSPHATASE_BINDING	GOMF_PHOSPHATASE_BINDING	3.50529e-05	0.00353515	0.00560696	MYO16/PPP1R16B/PHACTR1/PPP6R1/PIK3R2/DLG3	6	Brain_Cortex	rs34238187
REACTOME_NEGATIVE_REGULATION_OF_NMDA_RECEPTOR_MEDIATED_NEURONAL_TRANSMISSION	REACTOME_NEGATIVE_REGULATION_OF_NMDA_RECEPTOR_MEDIATED_NEURONAL_TRANSMISSION	3.86467e-05	0.00353515	0.00560696	DLG2/CAMK2A/DLG3	3	Brain_Cortex	rs34238187
REACTOME_UNBLOCKING_OF_NMDA_RECEPTORS_GLUTAMATE_BINDING_AND_ACTIVATION	REACTOME_UNBLOCKING_OF_NMDA_RECEPTORS_GLUTAMATE_BINDING_AND_ACTIVATION	3.86467e-05	0.00353515	0.00560696	DLG2/CAMK2A/DLG3	3	Brain_Cortex	rs34238187
REACTOME_LONG_TERM_POTENTIATION	REACTOME_LONG_TERM_POTENTIATION	5.12252e-05	0.00445147	0.00632227	DLG2/CAMK2A/DLG3	3	Brain_Cortex	rs34238187
GOBP_REGULATION_OF_DEPHOSPHORYLATION	GOBP_REGULATION_OF_DEPHOSPHORYLATION	5.60596e-05	0.00450166	0.00653455	PPP1R16B/DLG2/PHACTR1/CHP1/PPP6R1/DLG3	6	Brain_Cortex	rs34238187
GOBP_PHOSPHOLIPID_METABOLIC_PROCESS	GOBP_PHOSPHOLIPID_METABOLIC_PROCESS	5.69831e-05	0.00450166	0.0065512	PLAAT1/PIGN/SERINC2/CHP1/PIK3C2G/PLPPR2/PITPNM3/PIK3R2	8	Brain_Cortex	rs34238187
GOBP_GLYCEROLIPID_METABOLIC_PROCESS	GOBP_GLYCEROLIPID_METABOLIC_PROCESS	7.16242e-05	0.0054123	0.00760905	PLAAT1/PIGN/CPS1/SERINC2/PIK3C2G/PITPNM3/PANK2/PIK3R2	8	Brain_Cortex	rs34238187
REACTOME_CREB1_PHOSPHORYLATION_THROUGH_NMDA_RECEPTOR_MEDIATED_ACTIVATION_OF_RAS_SIGNALING	REACTOME_CREB1_PHOSPHORYLATION_THROUGH_NMDA_RECEPTOR_MEDIATED_ACTIVATION_OF_RAS_SIGNALING	9.36749e-05	0.00678362	0.00958755	DLG2/CAMK2A/DLG3	3	Brain_Cortex	rs34238187
GOMF_PROTEIN_PHOSPHATASE_BINDING	GOMF_PROTEIN_PHOSPHATASE_BINDING	0.000109106	0.00758502	0.0106689	MYO16/PPP1R16B/PHACTR1/PPP6R1/PIK3R2	5	Brain_Cortex	rs34238187
GOBP_POSITIVE_REGULATION_OF_PROTEIN_TARGETING_TO_MEMBRANE	GOBP_POSITIVE_REGULATION_OF_PROTEIN_TARGETING_TO_MEMBRANE	0.000115561	0.00772482	0.0111478	CACNB3/CHP1/CDK5R1	3	Brain_Cortex	rs34238187
GOBP_REGULATION_OF_PROTEIN_TARGETING	GOBP_REGULATION_OF_PROTEIN_TARGETING	0.00012818	0.008251	0.0118216	CACNB3/CHP1/SIAH3/CDK5R1	4	Brain_Cortex	rs34238187
GOBP_DEPHOSPHORYLATION	GOBP_DEPHOSPHORYLATION	0.000169683	0.0105325	0.0143834	PPP1R16B/DUSP3/DLG2/PHACTR1/CHP1/PLPPR2/PPP6R1/DLG3	8	Brain_Cortex	rs34238187
GOMF_PEPTIDE_TRANSMEMBRANE_TRANSPORTER_ACTIVITY	GOMF_PEPTIDE_TRANSMEMBRANE_TRANSPORTER_ACTIVITY	0.000184168	0.0110374	0.0153035	TIMM17A/DISP1/TOMM22	3	Brain_Cortex	rs34238187
GOBP_REGULATION_OF_PROTEIN_TARGETING_TO_MEMBRANE	GOBP_REGULATION_OF_PROTEIN_TARGETING_TO_MEMBRANE	0.00020045	0.0116128	0.016065	CACNB3/CHP1/CDK5R1	3	Brain_Cortex	rs34238187
GOBP_CALCIUM_ION_TRANSPORT	GOBP_CALCIUM_ION_TRANSPORT	0.000325118	0.0182276	0.0217889	HOMER1/CACNB3/JPH4/PANX1/CAMK2A/BHLHA15/TMEM38A	7	Brain_Cortex	rs34238187
REACTOME_ASSEMBLY_AND_CELL_SURFACE_PRESENTATION_OF_NMDA_RECEPTORS	REACTOME_ASSEMBLY_AND_CELL_SURFACE_PRESENTATION_OF_NMDA_RECEPTORS	0.000365062	0.0198274	0.0217889	DLG2/CAMK2A/DLG3	3	Brain_Cortex	rs34238187
GOBP_PROTEIN_IMPORT	GOBP_PROTEIN_IMPORT	0.000382644	0.0201526	0.0217889	TIMM17A/CHP1/FAM53C/TOMM22/PIK3R2	5	Brain_Cortex	rs34238187
GOBP_PHOSPHATIDYLINOSITOL_BIOSYNTHETIC_PROCESS	GOBP_PHOSPHATIDYLINOSITOL_BIOSYNTHETIC_PROCESS	0.000506896	0.0253652	0.0241715	PIGN/PIK3C2G/PITPNM3/PIK3R2	4	Brain_Cortex	rs34238187
GOBP_ADULT_BEHAVIOR	GOBP_ADULT_BEHAVIOR	0.000523574	0.0253652	0.0246341	HOMER1/MAFG/SHANK2/SEPTIN5	4	Brain_Cortex	rs34238187
GOMF_ACTIN_FILAMENT_BINDING	GOMF_ACTIN_FILAMENT_BINDING	0.000525402	0.0253652	0.0246341	MYO16/LASP1/ACTR3B/PANX1/CDK5R1	5	Brain_Cortex	rs34238187
GOBP_NEGATIVE_REGULATION_OF_HYDROLASE_ACTIVITY	GOBP_NEGATIVE_REGULATION_OF_HYDROLASE_ACTIVITY	0.000604398	0.0278551	0.0272146	NLE1/CST7/DLG2/PHACTR1/CHP1/CAMK2A/DLG3	7	Brain_Cortex	rs34238187
REACTOME_MAPK_FAMILY_SIGNALING_CASCADES	REACTOME_MAPK_FAMILY_SIGNALING_CASCADES	0.000609029	0.0278551	0.0272146	RASGEF1A/DLG2/SPRED3/CAMK2A/PIK3R2/DLG3	6	Brain_Cortex	rs34238187
GOMF_AMIDE_TRANSMEMBRANE_TRANSPORTER_ACTIVITY	GOMF_AMIDE_TRANSMEMBRANE_TRANSPORTER_ACTIVITY	0.000668235	0.0297793	0.0290583	TIMM17A/DISP1/TOMM22	3	Brain_Cortex	rs34238187
GOBP_RIBONUCLEOPROTEIN_COMPLEX_BIOGENESIS	GOBP_RIBONUCLEOPROTEIN_COMPLEX_BIOGENESIS	0.000749608	0.0325705	0.0314559	NOP16/SENP3/NLE1/ADAR/NPM3/TXNL4A/EBNA1BP2	7	Brain_Cortex	rs34238187
GOBP_GLYCEROPHOSPHOLIPID_METABOLIC_PROCESS	GOBP_GLYCEROPHOSPHOLIPID_METABOLIC_PROCESS	0.000816554	0.0346139	0.0336592	PLAAT1/PIGN/SERINC2/PIK3C2G/PITPNM3/PIK3R2	6	Brain_Cortex	rs34238187
GOBP_METAL_ION_TRANSPORT	GOBP_METAL_ION_TRANSPORT	0.000899518	0.0367546	0.0359491	HOMER1/CACNB3/JPH4/PANX1/CAMK2A/BHLHA15/TMEM38A	7	Brain_Cortex	rs34238187
GOBP_HOMOLOGOUS_RECOMBINATION	GOBP_HOMOLOGOUS_RECOMBINATION	0.000909349	0.0367546	0.0361698	CORT/MSH5/CNTD1	3	Brain_Cortex	rs34238187
GOBP_HEMATOPOIETIC_STEM_CELL_HOMEOSTASIS	GOBP_HEMATOPOIETIC_STEM_CELL_HOMEOSTASIS	0.00100126	0.0395498	0.0392673	NLE1/ADAR	2	Brain_Cortex	rs34238187
GOBP_REGULATION_OF_INTRACELLULAR_PROTEIN_TRANSPORT	GOBP_REGULATION_OF_INTRACELLULAR_PROTEIN_TRANSPORT	0.00113473	0.0428729	0.0432879	CACNB3/CHP1/SIAH3/CDK5R1/PIK3R2	5	Brain_Cortex	rs34238187
GOBP_REGULATION_OF_METAL_ION_TRANSPORT	GOBP_REGULATION_OF_METAL_ION_TRANSPORT	0.00113473	0.0428729	0.0432879	HOMER1/CACNB3/JPH4/CAMK2A/TMEM38A	5	Brain_Cortex	rs34238187
GOBP_POSITIVE_REGULATION_OF_MYELINATION	GOBP_POSITIVE_REGULATION_OF_MYELINATION	0.00129155	0.0477597	0.0471014	RNF10/CST7	2	Brain_Cortex	rs34238187
GOBP_REGULATION_OF_SYNAPTIC_TRANSMISSION_GLUTAMATERGIC	GOBP_REGULATION_OF_SYNAPTIC_TRANSMISSION_GLUTAMATERGIC	0.00136397	0.0493872	0.048712	HOMER1/TPRG1L/SHANK2	3	Brain_Cortex	rs34238187
GOMF_SIGNAL_SEQUENCE_BINDING	GOMF_SIGNAL_SEQUENCE_BINDING	4.37837e-08	5.28755e-05	3.28263e-05	KPNA2/KPNA4/POM121C/KPNA1/SRP68/NOLC1	6	Brain_Frontal_Cortex_BA9	rs34238187
GOMF_NUCLEAR_LOCALIZATION_SEQUENCE_BINDING	GOMF_NUCLEAR_LOCALIZATION_SEQUENCE_BINDING	6.33985e-08	5.28755e-05	3.99854e-05	KPNA2/KPNA4/POM121C/KPNA1/NOLC1	5	Brain_Frontal_Cortex_BA9	rs34238187
GOBP_PROTEIN_IMPORT	GOBP_PROTEIN_IMPORT	7.8813e-08	5.28755e-05	3.99854e-05	KPNA2/KPNA4/POM121C/CHP1/GRPEL2/KPNA1/ZPR1/HSPA8/NOLC1	9	Brain_Frontal_Cortex_BA9	rs34238187
GOBP_CELLULAR_AMINO_ACID_METABOLIC_PROCESS	GOBP_CELLULAR_AMINO_ACID_METABOLIC_PROCESS	8.35976e-08	5.28755e-05	3.99854e-05	SEPHS2/GFPT1/CARS1/IARS1/AZIN1/PSMD11/YARS1/PSME3/WARS1/PSMD12/PSMD5	11	Brain_Frontal_Cortex_BA9	rs34238187
GOBP_REGULATION_OF_MRNA_CATABOLIC_PROCESS	GOBP_REGULATION_OF_MRNA_CATABOLIC_PROCESS	1.54787e-07	7.83223e-05	5.80248e-05	HNRNPA0/LARP4B/PSMD11/YTHDF2/PSME3/NOCT/PSMD12/PSMD5/HSPA8	9	Brain_Frontal_Cortex_BA9	rs34238187
GOBP_RNA_CATABOLIC_PROCESS	GOBP_RNA_CATABOLIC_PROCESS	7.69315e-07	0.000275358	0.000247193	HNRNPA0/LARP4B/PSMD11/YTHDF2/PSME3/NOCT/PSMD12/ZPR1/PSMD5/NAF1/HSPA8	11	Brain_Frontal_Cortex_BA9	rs34238187
GOBP_REGULATION_OF_RESPONSE_TO_BIOTIC_STIMULUS	GOBP_REGULATION_OF_RESPONSE_TO_BIOTIC_STIMULUS	8.44952e-07	0.000275358	0.000252694	PSMD11/POLR3C/YTHDF2/PSME3/PVR/NR1H3/PSMD12/NPLOC4/AKIRIN2/PSMD5/FBXO38	11	Brain_Frontal_Cortex_BA9	rs34238187
REACTOME_ANTIVIRAL_MECHANISM_BY_IFN_STIMULATED_GENES	REACTOME_ANTIVIRAL_MECHANISM_BY_IFN_STIMULATED_GENES	8.70697e-07	0.000275358	0.000252694	KPNA2/KPNA4/POM121C/KPNA1/PLCG1/ARIH1	6	Brain_Frontal_Cortex_BA9	rs34238187
REACTOME_MAPK6_MAPK4_SIGNALING	REACTOME_MAPK6_MAPK4_SIGNALING	1.82973e-06	0.000514359	0.000357866	PSMD11/PSME3/CDC42EP3/PSMD12/PSMD5/CDC42	6	Brain_Frontal_Cortex_BA9	rs34238187
REACTOME_CYTOSOLIC_TRNA_AMINOACYLATION	REACTOME_CYTOSOLIC_TRNA_AMINOACYLATION	2.21681e-06	0.000560853	0.000398886	CARS1/IARS1/YARS1/WARS1	4	Brain_Frontal_Cortex_BA9	rs34238187
REACTOME_AUF1_HNRNP_D0_BINDS_AND_DESTABILIZES_MRNA	REACTOME_AUF1_HNRNP_D0_BINDS_AND_DESTABILIZES_MRNA	2.50201e-06	0.000575461	0.000432887	PSMD11/PSME3/PSMD12/PSMD5/HSPA8	5	Brain_Frontal_Cortex_BA9	rs34238187
REACTOME_TNFR2_NON_CANONICAL_NF_KB_PATHWAY	REACTOME_TNFR2_NON_CANONICAL_NF_KB_PATHWAY	2.96524e-06	0.000625172	0.000494034	PSMD11/PSME3/CD70/TNFRSF11A/PSMD12/PSMD5	6	Brain_Frontal_Cortex_BA9	rs34238187
REACTOME_METABOLISM_OF_POLYAMINES	REACTOME_METABOLISM_OF_POLYAMINES	3.55582e-06	0.000688488	0.000571271	AZIN1/PSMD11/PSME3/PSMD12/PSMD5	5	Brain_Frontal_Cortex_BA9	rs34238187
GOBP_IMPORT_INTO_NUCLEUS	GOBP_IMPORT_INTO_NUCLEUS	3.80981e-06	0.000688488	0.00059097	KPNA2/KPNA4/POM121C/CHP1/KPNA1/ZPR1/NOLC1	7	Brain_Frontal_Cortex_BA9	rs34238187
GOBP_REGULATION_OF_INNATE_IMMUNE_RESPONSE	GOBP_REGULATION_OF_INNATE_IMMUNE_RESPONSE	4.23829e-06	0.000714858	0.00063552	PSMD11/POLR3C/YTHDF2/PSME3/PVR/NR1H3/PSMD12/AKIRIN2/PSMD5	9	Brain_Frontal_Cortex_BA9	rs34238187
GOBP_REGULATION_OF_CELLULAR_AMINO_ACID_METABOLIC_PROCESS	GOBP_REGULATION_OF_CELLULAR_AMINO_ACID_METABOLIC_PROCESS	4.55305e-06	0.000719951	0.000660694	AZIN1/PSMD11/PSME3/PSMD12/PSMD5	5	Brain_Frontal_Cortex_BA9	rs34238187
REACTOME_REGULATION_OF_HMOX1_EXPRESSION_AND_ACTIVITY	REACTOME_REGULATION_OF_HMOX1_EXPRESSION_AND_ACTIVITY	5.75732e-06	0.00082303	0.000752593	PSMD11/CSNK2A2/PSME3/PSMD12/PSMD5	5	Brain_Frontal_Cortex_BA9	rs34238187
GOBP_TUMOR_NECROSIS_FACTOR_MEDIATED_SIGNALING_PATHWAY	GOBP_TUMOR_NECROSIS_FACTOR_MEDIATED_SIGNALING_PATHWAY	5.85555e-06	0.00082303	0.000752593	NOL3/PSMD11/PSME3/CD70/TNFRSF11A/PSMD12/PSMD5	7	Brain_Frontal_Cortex_BA9	rs34238187
GOBP_REGULATION_OF_MRNA_METABOLIC_PROCESS	GOBP_REGULATION_OF_MRNA_METABOLIC_PROCESS	7.14755e-06	0.000883299	0.000887095	HNRNPA0/LARP4B/PSMD11/YTHDF2/PSME3/NOCT/PSMD12/PSMD5/HSPA8	9	Brain_Frontal_Cortex_BA9	rs34238187
REACTOME_REGULATION_OF_RAS_BY_GAPS	REACTOME_REGULATION_OF_RAS_BY_GAPS	7.19785e-06	0.000883299	0.000887095	PSMD11/PSME3/PSMD12/PSMD5/SPRED3	5	Brain_Frontal_Cortex_BA9	rs34238187
GOBP_PROTEIN_POLYUBIQUITINATION	GOBP_PROTEIN_POLYUBIQUITINATION	7.67786e-06	0.000883299	0.000894911	PSMD11/PSME3/PLAA/PSMD12/ARIH1/UBE2D3/PSMD5/RLIM/FBXO38	9	Brain_Frontal_Cortex_BA9	rs34238187
REACTOME_REGULATION_OF_PTEN_STABILITY_AND_ACTIVITY	REACTOME_REGULATION_OF_PTEN_STABILITY_AND_ACTIVITY	7.73591e-06	0.000883299	0.000894911	PSMD11/CSNK2A2/PSME3/PSMD12/PSMD5	5	Brain_Frontal_Cortex_BA9	rs34238187
GOBP_POSITIVE_REGULATION_OF_RESPONSE_TO_BIOTIC_STIMULUS	GOBP_POSITIVE_REGULATION_OF_RESPONSE_TO_BIOTIC_STIMULUS	8.02999e-06	0.000883299	0.000903057	PSMD11/POLR3C/PSME3/PVR/PSMD12/AKIRIN2/PSMD5/FBXO38	8	Brain_Frontal_Cortex_BA9	rs34238187
GOBP_REGULATION_OF_HEMATOPOIETIC_STEM_CELL_DIFFERENTIATION	GOBP_REGULATION_OF_HEMATOPOIETIC_STEM_CELL_DIFFERENTIATION	1.0916e-05	0.00115072	0.000973391	PSMD11/YTHDF2/PSME3/PSMD12/PSMD5	5	Brain_Frontal_Cortex_BA9	rs34238187
REACTOME_CELLULAR_RESPONSE_TO_HYPOXIA	REACTOME_CELLULAR_RESPONSE_TO_HYPOXIA	1.16591e-05	0.0011799	0.000973391	PSMD11/PSME3/PSMD12/UBE2D3/PSMD5	5	Brain_Frontal_Cortex_BA9	rs34238187
GOBP_POSITIVE_REGULATION_OF_DEFENSE_RESPONSE	GOBP_POSITIVE_REGULATION_OF_DEFENSE_RESPONSE	1.27012e-05	0.00120034	0.000973391	PSMD11/POLR3C/PSME3/PVR/TNFRSF11A/PSMD12/NPAS2/AKIRIN2/PSMD5	9	Brain_Frontal_Cortex_BA9	rs34238187
GOBP_REGULATION_OF_CELLULAR_AMINE_METABOLIC_PROCESS	GOBP_REGULATION_OF_CELLULAR_AMINE_METABOLIC_PROCESS	1.32635e-05	0.00120034	0.000973391	AZIN1/PSMD11/PSME3/PSMD12/PSMD5	5	Brain_Frontal_Cortex_BA9	rs34238187
REACTOME_HOST_INTERACTIONS_OF_HIV_FACTORS	REACTOME_HOST_INTERACTIONS_OF_HIV_FACTORS	1.32844e-05	0.00120034	0.000973391	PSMD11/POM121C/PSME3/KPNA1/PSMD12/PSMD5	6	Brain_Frontal_Cortex_BA9	rs34238187
GOBP_POSITIVE_REGULATION_OF_ANION_TRANSPORT	GOBP_POSITIVE_REGULATION_OF_ANION_TRANSPORT	1.95113e-05	0.00158643	0.00127131	AZIN1/CSNK2A2/CHP1/MIEF1/TNFRSF11A/NR1H3/ZPR1/UBE2D3/CDC42/MYOM1	10	Brain_Frontal_Cortex_BA9	rs34238187
GOMF_LIGASE_ACTIVITY_FORMING_CARBON_OXYGEN_BONDS	GOMF_LIGASE_ACTIVITY_FORMING_CARBON_OXYGEN_BONDS	2.00655e-05	0.00158643	0.00127131	CARS1/IARS1/YARS1/WARS1	4	Brain_Frontal_Cortex_BA9	rs34238187
KEGG_AMINOACYL_TRNA_BIOSYNTHESIS	KEGG_AMINOACYL_TRNA_BIOSYNTHESIS	2.00655e-05	0.00158643	0.00127131	CARS1/IARS1/YARS1/WARS1	4	Brain_Frontal_Cortex_BA9	rs34238187
REACTOME_NS1_MEDIATED_EFFECTS_ON_HOST_PATHWAYS	REACTOME_NS1_MEDIATED_EFFECTS_ON_HOST_PATHWAYS	2.00655e-05	0.00158643	0.00127131	KPNA2/KPNA4/POM121C/KPNA1	4	Brain_Frontal_Cortex_BA9	rs34238187
GOBP_PROTEASOMAL_PROTEIN_CATABOLIC_PROCESS	GOBP_PROTEASOMAL_PROTEIN_CATABOLIC_PROCESS	2.13217e-05	0.00163467	0.00134146	DNAJB9/PSMD11/PSME3/PLAA/PSMD12/NPLOC4/ARIH1/UBE2D3/PSMD5/FBXO38	10	Brain_Frontal_Cortex_BA9	rs34238187
REACTOME_TRNA_AMINOACYLATION	REACTOME_TRNA_AMINOACYLATION	2.21106e-05	0.00164529	0.0013719	CARS1/IARS1/YARS1/WARS1	4	Brain_Frontal_Cortex_BA9	rs34238187
REACTOME_REGULATION_OF_MRNA_STABILITY_BY_PROTEINS_THAT_BIND_AU_RICH_ELEMENTS	REACTOME_REGULATION_OF_MRNA_STABILITY_BY_PROTEINS_THAT_BIND_AU_RICH_ELEMENTS	2.40401e-05	0.00173776	0.00146139	PSMD11/PSME3/PSMD12/PSMD5/HSPA8	5	Brain_Frontal_Cortex_BA9	rs34238187
GOBP_HEMATOPOIETIC_STEM_CELL_DIFFERENTIATION	GOBP_HEMATOPOIETIC_STEM_CELL_DIFFERENTIATION	2.54087e-05	0.00178567	0.00151084	PSMD11/YTHDF2/PSME3/PSMD12/PSMD5	5	Brain_Frontal_Cortex_BA9	rs34238187
GOBP_REGULATION_OF_HEMATOPOIETIC_PROGENITOR_CELL_DIFFERENTIATION	GOBP_REGULATION_OF_HEMATOPOIETIC_PROGENITOR_CELL_DIFFERENTIATION	2.6837e-05	0.00183507	0.00155773	PSMD11/YTHDF2/PSME3/PSMD12/PSMD5	5	Brain_Frontal_Cortex_BA9	rs34238187
GOBP_SCF_DEPENDENT_PROTEASOMAL_UBIQUITIN_DEPENDENT_PROTEIN_CATABOLIC_PROCESS	GOBP_SCF_DEPENDENT_PROTEASOMAL_UBIQUITIN_DEPENDENT_PROTEIN_CATABOLIC_PROCESS	3.31845e-05	0.00220939	0.00185438	PSMD11/PSME3/PSMD12/PSMD5/FBXO38	5	Brain_Frontal_Cortex_BA9	rs34238187
REACTOME_M_PHASE	REACTOME_M_PHASE	4.09707e-05	0.00259174	0.00222082	PSMD11/CSNK2A2/POM121C/PSME3/HAUS2/LPIN3/PSMD12/CEP78/PSMD5	9	Brain_Frontal_Cortex_BA9	rs34238187
GOBP_AMINO_ACID_ACTIVATION	GOBP_AMINO_ACID_ACTIVATION	4.09761e-05	0.00259174	0.00222082	CARS1/IARS1/YARS1/WARS1	4	Brain_Frontal_Cortex_BA9	rs34238187
GOBP_PHOSPHOLIPID_METABOLIC_PROCESS	GOBP_PHOSPHOLIPID_METABOLIC_PROCESS	4.25108e-05	0.00262323	0.0022902	CSNK2A2/HMGCS1/CHP1/IMPAD1/PLAA/NR1H3/LPIN3/PROCA1/PLCG1	9	Brain_Frontal_Cortex_BA9	rs34238187
REACTOME_CROSS_PRESENTATION_OF_SOLUBLE_EXOGENOUS_ANTIGENS_ENDOSOMES	REACTOME_CROSS_PRESENTATION_OF_SOLUBLE_EXOGENOUS_ANTIGENS_ENDOSOMES	4.44046e-05	0.00265778	0.00235001	PSMD11/PSME3/PSMD12/PSMD5	4	Brain_Frontal_Cortex_BA9	rs34238187
GOBP_MODULATION_BY_VIRUS_OF_HOST_CELLULAR_PROCESS	GOBP_MODULATION_BY_VIRUS_OF_HOST_CELLULAR_PROCESS	4.53488e-05	0.00265778	0.00236869	KPNA2/KPNA4/KPNA1	3	Brain_Frontal_Cortex_BA9	rs34238187
REACTOME_MAPK_FAMILY_SIGNALING_CASCADES	REACTOME_MAPK_FAMILY_SIGNALING_CASCADES	4.62223e-05	0.00265778	0.00237631	PSMD11/PSME3/RANBP9/CDC42EP3/PSMD12/PSMD5/SPRED3/CDC42	8	Brain_Frontal_Cortex_BA9	rs34238187
REACTOME_ABC_FAMILY_PROTEINS_MEDIATED_TRANSPORT	REACTOME_ABC_FAMILY_PROTEINS_MEDIATED_TRANSPORT	5.41758e-05	0.00304588	0.00266866	PSMD11/EIF2S1/PSME3/PSMD12/PSMD5	5	Brain_Frontal_Cortex_BA9	rs34238187
GOBP_REGULATION_OF_INTRACELLULAR_PROTEIN_TRANSPORT	GOBP_REGULATION_OF_INTRACELLULAR_PROTEIN_TRANSPORT	5.56847e-05	0.00306266	0.00272275	CSNK2A2/CHP1/MIEF1/ZPR1/UBE2D3/CDC42/NOLC1	7	Brain_Frontal_Cortex_BA9	rs34238187
REACTOME_NEGATIVE_REGULATION_OF_NOTCH4_SIGNALING	REACTOME_NEGATIVE_REGULATION_OF_NOTCH4_SIGNALING	6.02435e-05	0.00309196	0.0028984	PSMD11/PSME3/PSMD12/PSMD5	4	Brain_Frontal_Cortex_BA9	rs34238187
GOBP_STEM_CELL_DIFFERENTIATION	GOBP_STEM_CELL_DIFFERENTIATION	6.15961e-05	0.00309196	0.00293212	PSMD11/YTHDF2/PSME3/ALDH1A2/PSMD12/PSMD5/NOLC1	7	Brain_Frontal_Cortex_BA9	rs34238187
GOBP_NLS_BEARING_PROTEIN_IMPORT_INTO_NUCLEUS	GOBP_NLS_BEARING_PROTEIN_IMPORT_INTO_NUCLEUS	6.29933e-05	0.00309196	0.00296723	KPNA2/KPNA4/KPNA1	3	Brain_Frontal_Cortex_BA9	rs34238187
GOMF_NUCLEAR_IMPORT_SIGNAL_RECEPTOR_ACTIVITY	GOMF_NUCLEAR_IMPORT_SIGNAL_RECEPTOR_ACTIVITY	6.29933e-05	0.00309196	0.00296723	KPNA2/KPNA4/KPNA1	3	Brain_Frontal_Cortex_BA9	rs34238187
GOBP_NUCLEAR_TRANSPORT	GOBP_NUCLEAR_TRANSPORT	6.45491e-05	0.00309196	0.0029977	KPNA2/KPNA4/POM121C/CHP1/KPNA1/ZPR1/CCHCR1/NOLC1	8	Brain_Frontal_Cortex_BA9	rs34238187
REACTOME_DEGRADATION_OF_AXIN	REACTOME_DEGRADATION_OF_AXIN	6.47722e-05	0.00309196	0.0029977	PSMD11/PSME3/PSMD12/PSMD5	4	Brain_Frontal_Cortex_BA9	rs34238187
REACTOME_REGULATION_OF_RUNX3_EXPRESSION_AND_ACTIVITY	REACTOME_REGULATION_OF_RUNX3_EXPRESSION_AND_ACTIVITY	6.47722e-05	0.00309196	0.0029977	PSMD11/PSME3/PSMD12/PSMD5	4	Brain_Frontal_Cortex_BA9	rs34238187
GOBP_CELLULAR_KETONE_METABOLIC_PROCESS	GOBP_CELLULAR_KETONE_METABOLIC_PROCESS	6.63584e-05	0.00310901	0.00303054	AZIN1/PSMD11/PSME3/NR1H3/PSMD12/PSMD5/COQ10B	7	Brain_Frontal_Cortex_BA9	rs34238187
GOBP_POSITIVE_REGULATION_OF_INTRACELLULAR_PROTEIN_TRANSPORT	GOBP_POSITIVE_REGULATION_OF_INTRACELLULAR_PROTEIN_TRANSPORT	7.42198e-05	0.00330972	0.00328856	CSNK2A2/CHP1/MIEF1/ZPR1/UBE2D3/CDC42	6	Brain_Frontal_Cortex_BA9	rs34238187
REACTOME_DEGRADATION_OF_DVL	REACTOME_DEGRADATION_OF_DVL	7.45667e-05	0.00330972	0.00328856	PSMD11/PSME3/PSMD12/PSMD5	4	Brain_Frontal_Cortex_BA9	rs34238187
REACTOME_STABILIZATION_OF_P53	REACTOME_STABILIZATION_OF_P53	7.45667e-05	0.00330972	0.00328856	PSMD11/PSME3/PSMD12/PSMD5	4	Brain_Frontal_Cortex_BA9	rs34238187
GOBP_REGULATION_OF_STEM_CELL_DIFFERENTIATION	GOBP_REGULATION_OF_STEM_CELL_DIFFERENTIATION	8.07204e-05	0.00352108	0.00349148	PSMD11/YTHDF2/PSME3/PSMD12/PSMD5	5	Brain_Frontal_Cortex_BA9	rs34238187
GOBP_REGULATION_OF_PROTEIN_IMPORT	GOBP_REGULATION_OF_PROTEIN_IMPORT	8.53969e-05	0.0036282	0.00367609	CHP1/ZPR1/HSPA8/NOLC1	4	Brain_Frontal_Cortex_BA9	rs34238187
REACTOME_DEGRADATION_OF_GLI1_BY_THE_PROTEASOME	REACTOME_DEGRADATION_OF_GLI1_BY_THE_PROTEASOME	9.12205e-05	0.0036282	0.00369743	PSMD11/PSME3/PSMD12/PSMD5	4	Brain_Frontal_Cortex_BA9	rs34238187
REACTOME_SCF_SKP2_MEDIATED_DEGRADATION_OF_P27_P21	REACTOME_SCF_SKP2_MEDIATED_DEGRADATION_OF_P27_P21	9.12205e-05	0.0036282	0.00369743	PSMD11/PSME3/PSMD12/PSMD5	4	Brain_Frontal_Cortex_BA9	rs34238187
GOBP_MUCOPOLYSACCHARIDE_METABOLIC_PROCESS	GOBP_MUCOPOLYSACCHARIDE_METABOLIC_PROCESS	9.14855e-05	0.0036282	0.00369743	CHP1/IMPAD1/PRELP/CHPF2/B4GALT5	5	Brain_Frontal_Cortex_BA9	rs34238187
GOBP_REGULATION_OF_DNA_TEMPLATED_TRANSCRIPTION_IN_RESPONSE_TO_STRESS	GOBP_REGULATION_OF_DNA_TEMPLATED_TRANSCRIPTION_IN_RESPONSE_TO_STRESS	9.14855e-05	0.0036282	0.00369743	PSMD11/PSME3/PSMD12/BCLAF1/PSMD5	5	Brain_Frontal_Cortex_BA9	rs34238187
GOBP_REGULATION_OF_CELLULAR_KETONE_METABOLIC_PROCESS	GOBP_REGULATION_OF_CELLULAR_KETONE_METABOLIC_PROCESS	9.17806e-05	0.0036282	0.00369743	AZIN1/PSMD11/PSME3/NR1H3/PSMD12/PSMD5	6	Brain_Frontal_Cortex_BA9	rs34238187
REACTOME_DEFECTIVE_CFTR_CAUSES_CYSTIC_FIBROSIS	REACTOME_DEFECTIVE_CFTR_CAUSES_CYSTIC_FIBROSIS	9.73273e-05	0.00378828	0.00369743	PSMD11/PSME3/PSMD12/PSMD5	4	Brain_Frontal_Cortex_BA9	rs34238187
REACTOME_DECTIN_1_MEDIATED_NONCANONICAL_NF_KB_SIGNALING	REACTOME_DECTIN_1_MEDIATED_NONCANONICAL_NF_KB_SIGNALING	0.000103725	0.00397614	0.00369743	PSMD11/PSME3/PSMD12/PSMD5	4	Brain_Frontal_Cortex_BA9	rs34238187
GOBP_PROTEIN_LOCALIZATION_TO_NUCLEUS	GOBP_PROTEIN_LOCALIZATION_TO_NUCLEUS	0.000108817	0.00410087	0.00369743	KPNA2/KPNA4/POM121C/CHP1/KPNA1/ZPR1/NOLC1	7	Brain_Frontal_Cortex_BA9	rs34238187
GOBP_MODULATION_BY_SYMBIONT_OF_HOST_CELLULAR_PROCESS	GOBP_MODULATION_BY_SYMBIONT_OF_HOST_CELLULAR_PROCESS	0.000110568	0.00410087	0.00369743	KPNA2/KPNA4/KPNA1	3	Brain_Frontal_Cortex_BA9	rs34238187
REACTOME_REGULATION_OF_LIPID_METABOLISM_BY_PPARALPHA	REACTOME_REGULATION_OF_LIPID_METABOLISM_BY_PPARALPHA	0.000111842	0.00410087	0.00369743	HMGCS1/ALAS1/NR1H3/NPAS2/MED8	5	Brain_Frontal_Cortex_BA9	rs34238187
REACTOME_ASYMMETRIC_LOCALIZATION_OF_PCP_PROTEINS	REACTOME_ASYMMETRIC_LOCALIZATION_OF_PCP_PROTEINS	0.00011743	0.00424424	0.00369743	PSMD11/PSME3/PSMD12/PSMD5	4	Brain_Frontal_Cortex_BA9	rs34238187
GOMF_TRANSCRIPTION_COREGULATOR_ACTIVITY	GOMF_TRANSCRIPTION_COREGULATOR_ACTIVITY	0.000119529	0.00425927	0.00369743	AKIRIN1/LPIN3/PPRC1/NRIP1/AKIRIN2/BCLAF1/TFB2M/MED8/RLIM	9	Brain_Frontal_Cortex_BA9	rs34238187
REACTOME_HEDGEHOG_LIGAND_BIOGENESIS	REACTOME_HEDGEHOG_LIGAND_BIOGENESIS	0.000124752	0.00429489	0.00369743	PSMD11/PSME3/PSMD12/PSMD5	4	Brain_Frontal_Cortex_BA9	rs34238187
GOBP_ESTABLISHMENT_OF_TISSUE_POLARITY	GOBP_ESTABLISHMENT_OF_TISSUE_POLARITY	0.000125621	0.00429489	0.00369743	PSMD11/PSME3/PSMD12/PSMD5/CDC42	5	Brain_Frontal_Cortex_BA9	rs34238187
GOMF_CATALYTIC_ACTIVITY_ACTING_ON_A_TRNA	GOMF_CATALYTIC_ACTIVITY_ACTING_ON_A_TRNA	0.000125621	0.00429489	0.00369743	CARS1/IARS1/YARS1/TRMT6/WARS1	5	Brain_Frontal_Cortex_BA9	rs34238187
REACTOME_CYTOPROTECTION_BY_HMOX1	REACTOME_CYTOPROTECTION_BY_HMOX1	0.000130492	0.004344	0.00369743	PSMD11/CSNK2A2/PSME3/PSMD12/PSMD5	5	Brain_Frontal_Cortex_BA9	rs34238187
REACTOME_TCR_SIGNALING	REACTOME_TCR_SIGNALING	0.000130492	0.004344	0.00369743	PSMD11/PSME3/PSMD12/PLCG1/PSMD5	5	Brain_Frontal_Cortex_BA9	rs34238187
GOMF_CATALYTIC_ACTIVITY_ACTING_ON_RNA	GOMF_CATALYTIC_ACTIVITY_ACTING_ON_RNA	0.00013325	0.00437822	0.00369743	CARS1/IARS1/POLR3C/YARS1/TRMT6/NOCT/WARS1/TFB2M	8	Brain_Frontal_Cortex_BA9	rs34238187
GOBP_CIRCADIAN_REGULATION_OF_GENE_EXPRESSION	GOBP_CIRCADIAN_REGULATION_OF_GENE_EXPRESSION	0.000140382	0.00444494	0.00369743	GFPT1/NOCT/NPAS2/NRIP1	4	Brain_Frontal_Cortex_BA9	rs34238187
GOMF_TRNA_BINDING	GOMF_TRNA_BINDING	0.000140382	0.00444494	0.00369743	CARS1/IARS1/YARS1/YRDC	4	Brain_Frontal_Cortex_BA9	rs34238187
REACTOME_MITOTIC_G2_G2_M_PHASES	REACTOME_MITOTIC_G2_G2_M_PHASES	0.000140552	0.00444494	0.00369743	PSMD11/PSME3/HAUS2/PSMD12/CEP78/PSMD5	6	Brain_Frontal_Cortex_BA9	rs34238187
REACTOME_ASSEMBLY_OF_THE_PRE_REPLICATIVE_COMPLEX	REACTOME_ASSEMBLY_OF_THE_PRE_REPLICATIVE_COMPLEX	0.000148706	0.00458812	0.00383348	PSMD11/PSME3/PSMD12/PSMD5	4	Brain_Frontal_Cortex_BA9	rs34238187
REACTOME_G1_S_DNA_DAMAGE_CHECKPOINTS	REACTOME_G1_S_DNA_DAMAGE_CHECKPOINTS	0.000148706	0.00458812	0.00383348	PSMD11/PSME3/PSMD12/PSMD5	4	Brain_Frontal_Cortex_BA9	rs34238187
REACTOME_INTERFERON_SIGNALING	REACTOME_INTERFERON_SIGNALING	0.000152396	0.00464532	0.00391737	KPNA2/KPNA4/POM121C/KPNA1/PLCG1/ARIH1	6	Brain_Frontal_Cortex_BA9	rs34238187
GOBP_NEGATIVE_REGULATION_OF_RNA_CATABOLIC_PROCESS	GOBP_NEGATIVE_REGULATION_OF_RNA_CATABOLIC_PROCESS	0.000166416	0.00498943	0.00424141	HNRNPA0/LARP4B/NOCT/NAF1	4	Brain_Frontal_Cortex_BA9	rs34238187
GOBP_POSITIVE_REGULATION_OF_CELLULAR_PROTEIN_LOCALIZATION	GOBP_POSITIVE_REGULATION_OF_CELLULAR_PROTEIN_LOCALIZATION	0.000167629	0.00498943	0.00426026	CSNK2A2/CNPY4/CHP1/MIEF1/GNL3/ZPR1/UBE2D3	7	Brain_Frontal_Cortex_BA9	rs34238187
REACTOME_ORC1_REMOVAL_FROM_CHROMATIN	REACTOME_ORC1_REMOVAL_FROM_CHROMATIN	0.00017582	0.00517237	0.00443087	PSMD11/PSME3/PSMD12/PSMD5	4	Brain_Frontal_Cortex_BA9	rs34238187
GOBP_CIRCADIAN_RHYTHM	GOBP_CIRCADIAN_RHYTHM	0.000192732	0.00559386	0.00479001	GFPT1/NOCT/TNFRSF11A/NR1H3/NPAS2/NRIP1	6	Brain_Frontal_Cortex_BA9	rs34238187
REACTOME_REGULATION_OF_RUNX2_EXPRESSION_AND_ACTIVITY	REACTOME_REGULATION_OF_RUNX2_EXPRESSION_AND_ACTIVITY	0.000195768	0.00559386	0.00481086	PSMD11/PSME3/PSMD12/PSMD5	4	Brain_Frontal_Cortex_BA9	rs34238187
GOBP_MODULATION_BY_VIRUS_OF_HOST_PROCESS	GOBP_MODULATION_BY_VIRUS_OF_HOST_PROCESS	0.00019678	0.00559386	0.00481086	KPNA2/KPNA4/KPNA1	3	Brain_Frontal_Cortex_BA9	rs34238187
REACTOME_APC_C_CDH1_MEDIATED_DEGRADATION_OF_CDC20_AND_OTHER_APC_C_CDH1_TARGETED_PROTEINS_IN_LATE_MITOSIS_EARLY_G1	REACTOME_APC_C_CDH1_MEDIATED_DEGRADATION_OF_CDC20_AND_OTHER_APC_C_CDH1_TARGETED_PROTEINS_IN_LATE_MITOSIS_EARLY_G1	0.000206331	0.0058002	0.0050307	PSMD11/PSME3/PSMD12/PSMD5	4	Brain_Frontal_Cortex_BA9	rs34238187
REACTOME_INTRACELLULAR_SIGNALING_BY_SECOND_MESSENGERS	REACTOME_INTRACELLULAR_SIGNALING_BY_SECOND_MESSENGERS	0.000213781	0.00594358	0.0051703	KPNA2/PSMD11/CSNK2A2/PSME3/PSMD12/PLCG1/PSMD5	7	Brain_Frontal_Cortex_BA9	rs34238187
REACTOME_SURFACTANT_METABOLISM	REACTOME_SURFACTANT_METABOLISM	0.000218021	0.00599557	0.00523131	CKAP4/SFTPC/ADRA2A	3	Brain_Frontal_Cortex_BA9	rs34238187
REACTOME_PTEN_REGULATION	REACTOME_PTEN_REGULATION	0.000222382	0.00602892	0.00529296	PSMD11/CSNK2A2/PSME3/PSMD12/PSMD5	5	Brain_Frontal_Cortex_BA9	rs34238187
GOBP_POSITIVE_REGULATION_OF_INTRACELLULAR_TRANSPORT	GOBP_POSITIVE_REGULATION_OF_INTRACELLULAR_TRANSPORT	0.000223999	0.00602892	0.00530338	CSNK2A2/CHP1/MIEF1/ZPR1/UBE2D3/CDC42	6	Brain_Frontal_Cortex_BA9	rs34238187
GOBP_REGULATION_OF_CELL_CYCLE_G2_M_PHASE_TRANSITION	GOBP_REGULATION_OF_CELL_CYCLE_G2_M_PHASE_TRANSITION	0.000229578	0.00611401	0.005407	PSMD11/PSME3/HAUS2/PSMD12/CEP78/PSMD5	6	Brain_Frontal_Cortex_BA9	rs34238187
GOBP_NEGATIVE_REGULATION_OF_CATABOLIC_PROCESS	GOBP_NEGATIVE_REGULATION_OF_CATABOLIC_PROCESS	0.000235808	0.006151	0.00553924	HNRNPA0/LARP4B/AZIN1/CSNK2A2/NOCT/ADRA2A/NAF1	7	Brain_Frontal_Cortex_BA9	rs34238187
GOBP_REGULATION_OF_TRANSCRIPTION_FROM_RNA_POLYMERASE_II_PROMOTER_IN_RESPONSE_TO_HYPOXIA	GOBP_REGULATION_OF_TRANSCRIPTION_FROM_RNA_POLYMERASE_II_PROMOTER_IN_RESPONSE_TO_HYPOXIA	0.000240483	0.006151	0.00558109	PSMD11/PSME3/PSMD12/PSMD5	4	Brain_Frontal_Cortex_BA9	rs34238187
REACTOME_ABC_TRANSPORTER_DISORDERS	REACTOME_ABC_TRANSPORTER_DISORDERS	0.000240483	0.006151	0.00558109	PSMD11/PSME3/PSMD12/PSMD5	4	Brain_Frontal_Cortex_BA9	rs34238187
GOMF_NUCLEOCYTOPLASMIC_CARRIER_ACTIVITY	GOMF_NUCLEOCYTOPLASMIC_CARRIER_ACTIVITY	0.000240691	0.006151	0.00558109	KPNA2/KPNA4/KPNA1	3	Brain_Frontal_Cortex_BA9	rs34238187
GOBP_MORPHOGENESIS_OF_A_POLARIZED_EPITHELIUM	GOBP_MORPHOGENESIS_OF_A_POLARIZED_EPITHELIUM	0.000261927	0.00662676	0.00601152	PSMD11/PSME3/PSMD12/PSMD5/CDC42	5	Brain_Frontal_Cortex_BA9	rs34238187
REACTOME_THE_ROLE_OF_GTSE1_IN_G2_M_PROGRESSION_AFTER_G2_CHECKPOINT	REACTOME_THE_ROLE_OF_GTSE1_IN_G2_M_PROGRESSION_AFTER_G2_CHECKPOINT	0.000265395	0.00664802	0.0060144	PSMD11/PSME3/PSMD12/PSMD5	4	Brain_Frontal_Cortex_BA9	rs34238187
GOBP_RESPONSE_TO_TUMOR_NECROSIS_FACTOR	GOBP_RESPONSE_TO_TUMOR_NECROSIS_FACTOR	0.000269684	0.00668922	0.00609345	NOL3/PSMD11/PSME3/CD70/TNFRSF11A/PSMD12/PSMD5	7	Brain_Frontal_Cortex_BA9	rs34238187
GOBP_ANTIGEN_PROCESSING_AND_PRESENTATION_OF_EXOGENOUS_PEPTIDE_ANTIGEN_VIA_MHC_CLASS_I	GOBP_ANTIGEN_PROCESSING_AND_PRESENTATION_OF_EXOGENOUS_PEPTIDE_ANTIGEN_VIA_MHC_CLASS_I	0.000278522	0.00684136	0.00623338	PSMD11/PSME3/PSMD12/PSMD5	4	Brain_Frontal_Cortex_BA9	rs34238187
GOBP_REGULATION_OF_PROTEIN_TARGETING	GOBP_REGULATION_OF_PROTEIN_TARGETING	0.000292108	0.00703842	0.00645713	CSNK2A2/CHP1/MIEF1/UBE2D3	4	Brain_Frontal_Cortex_BA9	rs34238187
REACTOME_DOWNSTREAM_SIGNALING_EVENTS_OF_B_CELL_RECEPTOR_BCR	REACTOME_DOWNSTREAM_SIGNALING_EVENTS_OF_B_CELL_RECEPTOR_BCR	0.000292108	0.00703842	0.00645713	PSMD11/PSME3/PSMD12/PSMD5	4	Brain_Frontal_Cortex_BA9	rs34238187
GOBP_CELLULAR_RESPONSE_TO_OXYGEN_LEVELS	GOBP_CELLULAR_RESPONSE_TO_OXYGEN_LEVELS	0.000298458	0.00712357	0.00658132	NOL3/PSMD11/PSME3/PSMD12/RWDD3/PSMD5	6	Brain_Frontal_Cortex_BA9	rs34238187
REACTOME_HIV_INFECTION	REACTOME_HIV_INFECTION	0.000305444	0.00717216	0.00671146	PSMD11/POM121C/PSME3/KPNA1/PSMD12/PSMD5	6	Brain_Frontal_Cortex_BA9	rs34238187
REACTOME_SIGNALING_BY_NOTCH4	REACTOME_SIGNALING_BY_NOTCH4	0.000306163	0.00717216	0.00671146	PSMD11/PSME3/PSMD12/PSMD5	4	Brain_Frontal_Cortex_BA9	rs34238187
GOBP_POSITIVE_REGULATION_OF_ESTABLISHMENT_OF_PROTEIN_LOCALIZATION	GOBP_POSITIVE_REGULATION_OF_ESTABLISHMENT_OF_PROTEIN_LOCALIZATION	0.000313083	0.00726697	0.00683679	CSNK2A2/CHP1/MIEF1/ZPR1/UBE2D3/CDC42/MYOM1	7	Brain_Frontal_Cortex_BA9	rs34238187
GOBP_ANAPHASE_PROMOTING_COMPLEX_DEPENDENT_CATABOLIC_PROCESS	GOBP_ANAPHASE_PROMOTING_COMPLEX_DEPENDENT_CATABOLIC_PROCESS	0.000320697	0.00737603	0.00693572	PSMD11/PSME3/PSMD12/PSMD5	4	Brain_Frontal_Cortex_BA9	rs34238187
GOBP_REGULATION_OF_SMALL_MOLECULE_METABOLIC_PROCESS	GOBP_REGULATION_OF_SMALL_MOLECULE_METABOLIC_PROCESS	0.000330671	0.00753691	0.00710022	AZIN1/PSMD11/HMGCS1/POM121C/PSME3/NR1H3/PSMD12/PSMD5	8	Brain_Frontal_Cortex_BA9	rs34238187
GOBP_PROTEIN_TARGETING	GOBP_PROTEIN_TARGETING	0.000340877	0.0075951	0.0072846	CSNK2A2/TIMM10B/CHP1/GRPEL2/MIEF1/UBE2D3/SRP68/HSPA8	8	Brain_Frontal_Cortex_BA9	rs34238187
GOBP_NON_CANONICAL_WNT_SIGNALING_PATHWAY	GOBP_NON_CANONICAL_WNT_SIGNALING_PATHWAY	0.000346308	0.0075951	0.00736937	PSMD11/PSME3/PSMD12/PSMD5/CDC42	5	Brain_Frontal_Cortex_BA9	rs34238187
GOBP_CANONICAL_WNT_SIGNALING_PATHWAY	GOBP_CANONICAL_WNT_SIGNALING_PATHWAY	0.000349175	0.0075951	0.00738321	PSMD11/PSME3/KPNA1/PSMD12/SCYL2/RARG/PSMD5	7	Brain_Frontal_Cortex_BA9	rs34238187
REACTOME_CYCLIN_A_CDK2_ASSOCIATED_EVENTS_AT_S_PHASE_ENTRY	REACTOME_CYCLIN_A_CDK2_ASSOCIATED_EVENTS_AT_S_PHASE_ENTRY	0.000351236	0.0075951	0.00738321	PSMD11/PSME3/PSMD12/PSMD5	4	Brain_Frontal_Cortex_BA9	rs34238187
REACTOME_DEGRADATION_OF_BETA_CATENIN_BY_THE_DESTRUCTION_COMPLEX	REACTOME_DEGRADATION_OF_BETA_CATENIN_BY_THE_DESTRUCTION_COMPLEX	0.000351236	0.0075951	0.00738321	PSMD11/PSME3/PSMD12/PSMD5	4	Brain_Frontal_Cortex_BA9	rs34238187
REACTOME_DNA_REPLICATION_PRE_INITIATION	REACTOME_DNA_REPLICATION_PRE_INITIATION	0.000351236	0.0075951	0.00738321	PSMD11/PSME3/PSMD12/PSMD5	4	Brain_Frontal_Cortex_BA9	rs34238187
GOBP_FC_RECEPTOR_SIGNALING_PATHWAY	GOBP_FC_RECEPTOR_SIGNALING_PATHWAY	0.000358014	0.00767607	0.00750816	PSMD11/PSME3/PSMD12/PLCG1/PSMD5/CDC42	6	Brain_Frontal_Cortex_BA9	rs34238187
REACTOME_HEDGEHOG_ON_STATE	REACTOME_HEDGEHOG_ON_STATE	0.000367261	0.00780815	0.00763092	PSMD11/PSME3/PSMD12/PSMD5	4	Brain_Frontal_Cortex_BA9	rs34238187
REACTOME_APC_C_MEDIATED_DEGRADATION_OF_CELL_CYCLE_PROTEINS	REACTOME_APC_C_MEDIATED_DEGRADATION_OF_CELL_CYCLE_PROTEINS	0.000400868	0.00845163	0.00821536	PSMD11/PSME3/PSMD12/PSMD5	4	Brain_Frontal_Cortex_BA9	rs34238187
GOBP_MODULATION_BY_SYMBIONT_OF_HOST_PROCESS	GOBP_MODULATION_BY_SYMBIONT_OF_HOST_PROCESS	0.00040899	0.00855161	0.00830614	KPNA2/KPNA4/KPNA1	3	Brain_Frontal_Cortex_BA9	rs34238187
REACTOME_CELLULAR_RESPONSE_TO_CHEMICAL_STRESS	REACTOME_CELLULAR_RESPONSE_TO_CHEMICAL_STRESS	0.00042502	0.00881394	0.00859289	PSMD11/CSNK2A2/PSME3/PSMD12/PSMD5	5	Brain_Frontal_Cortex_BA9	rs34238187
GOBP_HEMATOPOIETIC_PROGENITOR_CELL_DIFFERENTIATION	GOBP_HEMATOPOIETIC_PROGENITOR_CELL_DIFFERENTIATION	0.00043728	0.00899445	0.00882093	PSMD11/YTHDF2/PSME3/PSMD12/PSMD5	5	Brain_Frontal_Cortex_BA9	rs34238187
REACTOME_SWITCHING_OF_ORIGINS_TO_A_POST_REPLICATIVE_STATE	REACTOME_SWITCHING_OF_ORIGINS_TO_A_POST_REPLICATIVE_STATE	0.000455316	0.00928866	0.00910312	PSMD11/PSME3/PSMD12/PSMD5	4	Brain_Frontal_Cortex_BA9	rs34238187
GOBP_REGULATION_OF_INTRACELLULAR_TRANSPORT	GOBP_REGULATION_OF_INTRACELLULAR_TRANSPORT	0.000461947	0.00928866	0.00920777	CSNK2A2/CHP1/MIEF1/ZPR1/UBE2D3/CDC42/NOLC1	7	Brain_Frontal_Cortex_BA9	rs34238187
GOBP_AMINE_METABOLIC_PROCESS	GOBP_AMINE_METABOLIC_PROCESS	0.000462597	0.00928866	0.00920777	AZIN1/PSMD11/PSME3/PSMD12/PSMD5	5	Brain_Frontal_Cortex_BA9	rs34238187
REACTOME_PCP_CE_PATHWAY	REACTOME_PCP_CE_PATHWAY	0.00047458	0.00945424	0.00938401	PSMD11/PSME3/PSMD12/PSMD5	4	Brain_Frontal_Cortex_BA9	rs34238187
GOBP_FC_EPSILON_RECEPTOR_SIGNALING_PATHWAY	GOBP_FC_EPSILON_RECEPTOR_SIGNALING_PATHWAY	0.00053072	0.01049	0.0103575	PSMD11/PSME3/PSMD12/PLCG1/PSMD5	5	Brain_Frontal_Cortex_BA9	rs34238187
REACTOME_TRANSCRIPTIONAL_REGULATION_BY_RUNX3	REACTOME_TRANSCRIPTIONAL_REGULATION_BY_RUNX3	0.000557471	0.0109333	0.0107193	PSMD11/PSME3/PSMD12/PSMD5	4	Brain_Frontal_Cortex_BA9	rs34238187
GOBP_AMINOGLYCAN_METABOLIC_PROCESS	GOBP_AMINOGLYCAN_METABOLIC_PROCESS	0.000590435	0.0114908	0.0111833	CHP1/IMPAD1/PRELP/CHPF2/B4GALT5	5	Brain_Frontal_Cortex_BA9	rs34238187
GOBP_MODULATION_OF_PROCESS_OF_OTHER_ORGANISM_INVOLVED_IN_SYMBIOTIC_INTERACTION	GOBP_MODULATION_OF_PROCESS_OF_OTHER_ORGANISM_INVOLVED_IN_SYMBIOTIC_INTERACTION	0.000602552	0.0116371	0.0113371	KPNA2/KPNA4/KPNA1/HSPA8	4	Brain_Frontal_Cortex_BA9	rs34238187
GOBP_ANTIGEN_PROCESSING_AND_PRESENTATION_OF_PEPTIDE_ANTIGEN_VIA_MHC_CLASS_I	GOBP_ANTIGEN_PROCESSING_AND_PRESENTATION_OF_PEPTIDE_ANTIGEN_VIA_MHC_CLASS_I	0.000626035	0.0119088	0.0115892	PSMD11/PSME3/PSMD12/PSMD5	4	Brain_Frontal_Cortex_BA9	rs34238187
GOBP_DIGESTIVE_SYSTEM_PROCESS	GOBP_DIGESTIVE_SYSTEM_PROCESS	0.000626035	0.0119088	0.0115892	UGCG/NR1H3/ADRA2A/STRAP	4	Brain_Frontal_Cortex_BA9	rs34238187
REACTOME_SIGNALING_BY_RETINOIC_ACID	REACTOME_SIGNALING_BY_RETINOIC_ACID	0.000638574	0.0120093	0.0117248	RDH11/ALDH1A2/RARG	3	Brain_Frontal_Cortex_BA9	rs34238187
GOBP_PROTEIN_TARGETING_TO_MITOCHONDRION	GOBP_PROTEIN_TARGETING_TO_MITOCHONDRION	0.00065016	0.0120093	0.0118649	CSNK2A2/TIMM10B/GRPEL2/UBE2D3	4	Brain_Frontal_Cortex_BA9	rs34238187
REACTOME_CLEC7A_DECTIN_1_SIGNALING	REACTOME_CLEC7A_DECTIN_1_SIGNALING	0.00065016	0.0120093	0.0118649	PSMD11/PSME3/PSMD12/PSMD5	4	Brain_Frontal_Cortex_BA9	rs34238187
GOBP_REGULATION_OF_ANIMAL_ORGAN_MORPHOGENESIS	GOBP_REGULATION_OF_ANIMAL_ORGAN_MORPHOGENESIS	0.000655055	0.0120093	0.0118888	PSMD11/PSME3/PSMD12/PSMD5/CDC42	5	Brain_Frontal_Cortex_BA9	rs34238187
REACTOME_DISORDERS_OF_TRANSMEMBRANE_TRANSPORTERS	REACTOME_DISORDERS_OF_TRANSMEMBRANE_TRANSPORTERS	0.000655055	0.0120093	0.0118888	PSMD11/POM121C/PSME3/PSMD12/PSMD5	5	Brain_Frontal_Cortex_BA9	rs34238187
GOBP_FACE_DEVELOPMENT	GOBP_FACE_DEVELOPMENT	0.000683349	0.012334	0.0121984	ALDH1A2/CRISPLD1/RARG	3	Brain_Frontal_Cortex_BA9	rs34238187
REACTOME_METABOLISM_OF_AMINO_ACIDS_AND_DERIVATIVES	REACTOME_METABOLISM_OF_AMINO_ACIDS_AND_DERIVATIVES	0.00069459	0.012334	0.0123745	SEPHS2/IARS1/AZIN1/PSMD11/PSME3/PSMD12/PSMD5	7	Brain_Frontal_Cortex_BA9	rs34238187
REACTOME_INTERLEUKIN_1_SIGNALING	REACTOME_INTERLEUKIN_1_SIGNALING	0.000700375	0.012334	0.0124283	PSMD11/PSME3/PSMD12/PSMD5	4	Brain_Frontal_Cortex_BA9	rs34238187
REACTOME_UCH_PROTEINASES	REACTOME_UCH_PROTEINASES	0.000700375	0.012334	0.0124283	PSMD11/PSME3/PSMD12/PSMD5	4	Brain_Frontal_Cortex_BA9	rs34238187
GOBP_NEGATIVE_REGULATION_OF_CANONICAL_WNT_SIGNALING_PATHWAY	GOBP_NEGATIVE_REGULATION_OF_CANONICAL_WNT_SIGNALING_PATHWAY	0.00070689	0.012334	0.0124681	PSMD11/PSME3/PSMD12/SCYL2/PSMD5	5	Brain_Frontal_Cortex_BA9	rs34238187
GOBP_TRNA_METABOLIC_PROCESS	GOBP_TRNA_METABOLIC_PROCESS	0.00070689	0.012334	0.0124681	CARS1/IARS1/YARS1/TRMT6/WARS1	5	Brain_Frontal_Cortex_BA9	rs34238187
REACTOME_APOPTOSIS	REACTOME_APOPTOSIS	0.00070689	0.012334	0.0124681	PSMD11/PSME3/KPNA1/PSMD12/PSMD5	5	Brain_Frontal_Cortex_BA9	rs34238187
GOBP_INTERLEUKIN_1_MEDIATED_SIGNALING_PATHWAY	GOBP_INTERLEUKIN_1_MEDIATED_SIGNALING_PATHWAY	0.000726484	0.0125638	0.0127527	PSMD11/PSME3/PSMD12/PSMD5	4	Brain_Frontal_Cortex_BA9	rs34238187
GOBP_NCRNA_METABOLIC_PROCESS	GOBP_NCRNA_METABOLIC_PROCESS	0.000729992	0.0125638	0.0127527	CARS1/IARS1/YARS1/TRMT6/WARS1/TFB2M/NAF1/NOLC1	8	Brain_Frontal_Cortex_BA9	rs34238187
GOBP_CELL_CYCLE_G2_M_PHASE_TRANSITION	GOBP_CELL_CYCLE_G2_M_PHASE_TRANSITION	0.000778618	0.0132237	0.0133022	PSMD11/PSME3/HAUS2/PSMD12/CEP78/PSMD5	6	Brain_Frontal_Cortex_BA9	rs34238187
KEGG_PROTEASOME	KEGG_PROTEASOME	0.00077879	0.0132237	0.0133022	PSMD11/PSME3/PSMD12	3	Brain_Frontal_Cortex_BA9	rs34238187
REACTOME_ANTIGEN_PROCESSING_CROSS_PRESENTATION	REACTOME_ANTIGEN_PROCESSING_CROSS_PRESENTATION	0.000808936	0.0134936	0.0133817	PSMD11/PSME3/PSMD12/PSMD5	4	Brain_Frontal_Cortex_BA9	rs34238187
GOBP_RESPONSE_TO_OXYGEN_LEVELS	GOBP_RESPONSE_TO_OXYGEN_LEVELS	0.000810246	0.0134936	0.0133817	NOL3/PSMD11/ALAS1/PSME3/PSMD12/RWDD3/PSMD5	7	Brain_Frontal_Cortex_BA9	rs34238187
GOMF_THIOESTERASE_BINDING	GOMF_THIOESTERASE_BINDING	0.000810684	0.0134936	0.0133817	ADRA2A/CDC42	2	Brain_Frontal_Cortex_BA9	rs34238187
GOBP_NIK_NF_KAPPAB_SIGNALING	GOBP_NIK_NF_KAPPAB_SIGNALING	0.000819694	0.0135544	0.0133817	NOL3/PSMD11/PSME3/PSMD12/PSMD5	5	Brain_Frontal_Cortex_BA9	rs34238187
REACTOME_FC_EPSILON_RECEPTOR_FCERI_SIGNALING	REACTOME_FC_EPSILON_RECEPTOR_FCERI_SIGNALING	0.000839726	0.0137955	0.0133817	PSMD11/PSME3/PSMD12/PLCG1/PSMD5	5	Brain_Frontal_Cortex_BA9	rs34238187
GOMF_AMIDE_BINDING	GOMF_AMIDE_BINDING	0.00089989	0.0146885	0.0133817	KPNA2/KPNA4/POM121C/KPNA1/ACBD4/SRP68/NOLC1	7	Brain_Frontal_Cortex_BA9	rs34238187
GOBP_NEGATIVE_REGULATION_OF_CELL_CYCLE_G2_M_PHASE_TRANSITION	GOBP_NEGATIVE_REGULATION_OF_CELL_CYCLE_G2_M_PHASE_TRANSITION	0.000960696	0.0155376	0.0133817	PSMD11/PSME3/PSMD12/PSMD5	4	Brain_Frontal_Cortex_BA9	rs34238187
GOBP_POSITIVE_REGULATION_OF_PROTEIN_SUMOYLATION	GOBP_POSITIVE_REGULATION_OF_PROTEIN_SUMOYLATION	0.000970333	0.0155376	0.0133817	GNL3/RWDD3	2	Brain_Frontal_Cortex_BA9	rs34238187
GOBP_REGULATION_OF_PINOCYTOSIS	GOBP_REGULATION_OF_PINOCYTOSIS	0.000970333	0.0155376	0.0133817	NR1H3/CDC42	2	Brain_Frontal_Cortex_BA9	rs34238187
GOBP_ANTIGEN_PROCESSING_AND_PRESENTATION_OF_PEPTIDE_ANTIGEN	GOBP_ANTIGEN_PROCESSING_AND_PRESENTATION_OF_PEPTIDE_ANTIGEN	0.00101339	0.016125	0.0133817	PSMD11/PSME3/PSMD12/LGMN/PSMD5	5	Brain_Frontal_Cortex_BA9	rs34238187
REACTOME_HEDGEHOG_OFF_STATE	REACTOME_HEDGEHOG_OFF_STATE	0.00102665	0.0162339	0.0133817	PSMD11/PSME3/PSMD12/PSMD5	4	Brain_Frontal_Cortex_BA9	rs34238187
GOBP_REGULATION_OF_LIPID_METABOLIC_PROCESS	GOBP_REGULATION_OF_LIPID_METABOLIC_PROCESS	0.00104134	0.0163638	0.0133817	HMGCS1/CHP1/ALAS1/NR1H3/NPAS2/ADRA2A/CDC42	7	Brain_Frontal_Cortex_BA9	rs34238187
GOBP_RHYTHMIC_PROCESS	GOBP_RHYTHMIC_PROCESS	0.00107806	0.0168363	0.0133817	GFPT1/NOCT/TNFRSF11A/NR1H3/NPAS2/NRIP1	6	Brain_Frontal_Cortex_BA9	rs34238187
REACTOME_TRANSLATION	REACTOME_TRANSLATION	0.00109696	0.0170264	0.0133817	CARS1/IARS1/YARS1/EIF2S1/WARS1/SRP68	6	Brain_Frontal_Cortex_BA9	rs34238187
REACTOME_ORGANELLE_BIOGENESIS_AND_MAINTENANCE	REACTOME_ORGANELLE_BIOGENESIS_AND_MAINTENANCE	0.00111611	0.0172181	0.0133817	ALAS1/ASAP1/HAUS2/PPRC1/CEP78/TFB2M	6	Brain_Frontal_Cortex_BA9	rs34238187
REACTOME_SIGNALING_BY_NUCLEAR_RECEPTORS	REACTOME_SIGNALING_BY_NUCLEAR_RECEPTORS	0.00113553	0.0174114	0.0133817	KPNA2/RDH11/NR1H3/ALDH1A2/RARG/NRIP1	6	Brain_Frontal_Cortex_BA9	rs34238187
GOBP_PROTEASOME_ASSEMBLY	GOBP_PROTEASOME_ASSEMBLY	0.00114383	0.017433	0.0133817	PSMD11/PSMD5	2	Brain_Frontal_Cortex_BA9	rs34238187
GOBP_INNATE_IMMUNE_RESPONSE_ACTIVATING_SIGNAL_TRANSDUCTION	GOBP_INNATE_IMMUNE_RESPONSE_ACTIVATING_SIGNAL_TRANSDUCTION	0.00120534	0.0182606	0.013832	PSMD11/PSME3/PSMD12/PSMD5	4	Brain_Frontal_Cortex_BA9	rs34238187
GOBP_T_CELL_RECEPTOR_SIGNALING_PATHWAY	GOBP_T_CELL_RECEPTOR_SIGNALING_PATHWAY	0.00126637	0.019071	0.0144769	PSMD11/PSME3/PSMD12/PLCG1/PSMD5	5	Brain_Frontal_Cortex_BA9	rs34238187
REACTOME_TRANSCRIPTIONAL_REGULATION_BY_RUNX2	REACTOME_TRANSCRIPTIONAL_REGULATION_BY_RUNX2	0.00128255	0.0192003	0.0146062	PSMD11/PSME3/PSMD12/PSMD5	4	Brain_Frontal_Cortex_BA9	rs34238187
GOBP_RESPONSE_TO_INTERLEUKIN_1	GOBP_RESPONSE_TO_INTERLEUKIN_1	0.00129401	0.019258	0.0146995	PSMD11/PSME3/TNFRSF11A/PSMD12/PSMD5	5	Brain_Frontal_Cortex_BA9	rs34238187
REACTOME_TRANSCRIPTIONAL_ACTIVATION_OF_MITOCHONDRIAL_BIOGENESIS	REACTOME_TRANSCRIPTIONAL_ACTIVATION_OF_MITOCHONDRIAL_BIOGENESIS	0.00131191	0.0193538	0.0148466	ALAS1/PPRC1/TFB2M	3	Brain_Frontal_Cortex_BA9	rs34238187
GOBP_GOLGI_LOCALIZATION	GOBP_GOLGI_LOCALIZATION	0.00133105	0.0193538	0.0149318	ARCN1/CDC42	2	Brain_Frontal_Cortex_BA9	rs34238187
GOBP_REGULATION_OF_PSEUDOPODIUM_ASSEMBLY	GOBP_REGULATION_OF_PSEUDOPODIUM_ASSEMBLY	0.00133105	0.0193538	0.0149318	CDC42EP3/CDC42	2	Brain_Frontal_Cortex_BA9	rs34238187
REACTOME_HEME_BIOSYNTHESIS	REACTOME_HEME_BIOSYNTHESIS	0.00133105	0.0193538	0.0149318	ALAS1/COX10	2	Brain_Frontal_Cortex_BA9	rs34238187
REACTOME_ANTIGEN_PROCESSING_UBIQUITINATION_PROTEASOME_DEGRADATION	REACTOME_ANTIGEN_PROCESSING_UBIQUITINATION_PROTEASOME_DEGRADATION	0.00136657	0.0197566	0.0153111	PSMD11/PSME3/PSMD12/UBE2D3/PSMD5/RLIM	6	Brain_Frontal_Cortex_BA9	rs34238187
REACTOME_PROGRAMMED_CELL_DEATH	REACTOME_PROGRAMMED_CELL_DEATH	0.00137961	0.0198319	0.0154289	PSMD11/PSME3/KPNA1/PSMD12/PSMD5	5	Brain_Frontal_Cortex_BA9	rs34238187
GOBP_MODULATION_OF_PROCESS_OF_OTHER_ORGANISM	GOBP_MODULATION_OF_PROCESS_OF_OTHER_ORGANISM	0.00140475	0.0199664	0.0155644	KPNA2/KPNA4/KPNA1/HSPA8	4	Brain_Frontal_Cortex_BA9	rs34238187
GOMF_HEAT_SHOCK_PROTEIN_BINDING	GOMF_HEAT_SHOCK_PROTEIN_BINDING	0.00140475	0.0199664	0.0155644	DNAJB9/NPAS2/GMEB1/HSPA8	4	Brain_Frontal_Cortex_BA9	rs34238187
REACTOME_GLYCOSAMINOGLYCAN_METABOLISM	REACTOME_GLYCOSAMINOGLYCAN_METABOLISM	0.00144723	0.0204552	0.0159565	CHP1/PRELP/CHPF2/B4GALT5	4	Brain_Frontal_Cortex_BA9	rs34238187
GOBP_NEGATIVE_REGULATION_OF_WNT_SIGNALING_PATHWAY	GOBP_NEGATIVE_REGULATION_OF_WNT_SIGNALING_PATHWAY	0.00150016	0.0209499	0.0164594	PSMD11/PSME3/PSMD12/SCYL2/PSMD5	5	Brain_Frontal_Cortex_BA9	rs34238187
GOMF_PEPTIDE_BINDING	GOMF_PEPTIDE_BINDING	0.00153125	0.0209499	0.0166856	KPNA2/KPNA4/POM121C/KPNA1/SRP68/NOLC1	6	Brain_Frontal_Cortex_BA9	rs34238187
GOBP_POSITIVE_REGULATION_OF_RESPONSE_TO_TUMOR_CELL	GOBP_POSITIVE_REGULATION_OF_RESPONSE_TO_TUMOR_CELL	0.00153191	0.0209499	0.0166856	PVR/FBXO38	2	Brain_Frontal_Cortex_BA9	rs34238187
GOBP_RETINAL_METABOLIC_PROCESS	GOBP_RETINAL_METABOLIC_PROCESS	0.00153191	0.0209499	0.0166856	RDH11/ALDH1A2	2	Brain_Frontal_Cortex_BA9	rs34238187
GOBP_SKELETAL_MUSCLE_CELL_PROLIFERATION	GOBP_SKELETAL_MUSCLE_CELL_PROLIFERATION	0.00153191	0.0209499	0.0166856	AKIRIN1/KPNA1	2	Brain_Frontal_Cortex_BA9	rs34238187
GOBP_TERPENOID_BIOSYNTHETIC_PROCESS	GOBP_TERPENOID_BIOSYNTHETIC_PROCESS	0.00153191	0.0209499	0.0166856	HMGCS1/ALDH1A2	2	Brain_Frontal_Cortex_BA9	rs34238187
GOBP_NEGATIVE_REGULATION_OF_MRNA_CATABOLIC_PROCESS	GOBP_NEGATIVE_REGULATION_OF_MRNA_CATABOLIC_PROCESS	0.00160726	0.0217453	0.0173385	HNRNPA0/LARP4B/NOCT	3	Brain_Frontal_Cortex_BA9	rs34238187
REACTOME_RHOQ_GTPASE_CYCLE	REACTOME_RHOQ_GTPASE_CYCLE	0.00160726	0.0217453	0.0173385	CDC42EP3/DIAPH3/CDC42	3	Brain_Frontal_Cortex_BA9	rs34238187
REACTOME_DNA_REPLICATION	REACTOME_DNA_REPLICATION	0.0016261	0.0218831	0.0174997	PSMD11/PSME3/PSMD12/PSMD5	4	Brain_Frontal_Cortex_BA9	rs34238187
REACTOME_SIGNALING_BY_ROBO_RECEPTORS	REACTOME_SIGNALING_BY_ROBO_RECEPTORS	0.00169527	0.0226934	0.0180927	PSMD11/PSME3/PSMD12/PSMD5/CDC42	5	Brain_Frontal_Cortex_BA9	rs34238187
REACTOME_RUNX1_REGULATES_TRANSCRIPTION_OF_GENES_INVOLVED_IN_DIFFERENTIATION_OF_HSCS	REACTOME_RUNX1_REGULATES_TRANSCRIPTION_OF_GENES_INVOLVED_IN_DIFFERENTIATION_OF_HSCS	0.00172105	0.0229172	0.0183215	PSMD11/PSME3/PSMD12/PSMD5	4	Brain_Frontal_Cortex_BA9	rs34238187
GOMF_LIPASE_ACTIVITY	GOMF_LIPASE_ACTIVITY	0.00176995	0.0234448	0.018712	SEC23IP/CES5A/PROCA1/PLCG1	4	Brain_Frontal_Cortex_BA9	rs34238187
GOBP_REGULATION_OF_PROTEIN_CONTAINING_COMPLEX_ASSEMBLY	GOBP_REGULATION_OF_PROTEIN_CONTAINING_COMPLEX_ASSEMBLY	0.00188375	0.0248223	0.0197988	SSH3/ASAP1/CDC42EP3/WARS1/CLDN7/CDC42/HSPA8	7	Brain_Frontal_Cortex_BA9	rs34238187
GOBP_RHO_PROTEIN_SIGNAL_TRANSDUCTION	GOBP_RHO_PROTEIN_SIGNAL_TRANSDUCTION	0.00192239	0.0252002	0.0201344	KANK2/CDC42EP3/ADRA2A/CDC42	4	Brain_Frontal_Cortex_BA9	rs34238187
GOBP_PSEUDOPODIUM_ORGANIZATION	GOBP_PSEUDOPODIUM_ORGANIZATION	0.00197406	0.0256122	0.0205199	CDC42EP3/CDC42	2	Brain_Frontal_Cortex_BA9	rs34238187
GOMF_RETINOID_X_RECEPTOR_BINDING	GOMF_RETINOID_X_RECEPTOR_BINDING	0.00197406	0.0256122	0.0205199	RARG/NRIP1	2	Brain_Frontal_Cortex_BA9	rs34238187
GOMF_CADHERIN_BINDING	GOMF_CADHERIN_BINDING	0.00199406	0.0257396	0.020621	LRRC59/ASAP1/BZW1/BZW2/DIAPH3/HSPA8	6	Brain_Frontal_Cortex_BA9	rs34238187
REACTOME_FCERI_MEDIATED_NF_KB_ACTIVATION	REACTOME_FCERI_MEDIATED_NF_KB_ACTIVATION	0.00202892	0.0260567	0.0208575	PSMD11/PSME3/PSMD12/PSMD5	4	Brain_Frontal_Cortex_BA9	rs34238187
GOBP_DIGESTION	GOBP_DIGESTION	0.00213947	0.0273377	0.0218733	UGCG/NR1H3/ADRA2A/STRAP	4	Brain_Frontal_Cortex_BA9	rs34238187
GOBP_REGULATION_OF_RESPONSE_TO_TUMOR_CELL	GOBP_REGULATION_OF_RESPONSE_TO_TUMOR_CELL	0.00221515	0.028056	0.02242	PVR/FBXO38	2	Brain_Frontal_Cortex_BA9	rs34238187
GOBP_MULTI_ORGANISM_LOCALIZATION	GOBP_MULTI_ORGANISM_LOCALIZATION	0.00221787	0.028056	0.02242	KPNA2/POM121C/KPNA1	3	Brain_Frontal_Cortex_BA9	rs34238187
REACTOME_C_TYPE_LECTIN_RECEPTORS_CLRS	REACTOME_C_TYPE_LECTIN_RECEPTORS_CLRS	0.00225411	0.0282164	0.0226844	PSMD11/PSME3/PSMD12/PSMD5	4	Brain_Frontal_Cortex_BA9	rs34238187
REACTOME_INTERLEUKIN_1_FAMILY_SIGNALING	REACTOME_INTERLEUKIN_1_FAMILY_SIGNALING	0.00225411	0.0282164	0.0226844	PSMD11/PSME3/PSMD12/PSMD5	4	Brain_Frontal_Cortex_BA9	rs34238187
GOBP_PROTEIN_FOLDING	GOBP_PROTEIN_FOLDING	0.002264	0.0282164	0.0227585	CSNK2A2/GRPEL2/CRTAP/DNAJC25/HSPA8	5	Brain_Frontal_Cortex_BA9	rs34238187
GOBP_ANTIGEN_PROCESSING_AND_PRESENTATION	GOBP_ANTIGEN_PROCESSING_AND_PRESENTATION	0.00230629	0.0282975	0.0231061	PSMD11/PSME3/PSMD12/LGMN/PSMD5	5	Brain_Frontal_Cortex_BA9	rs34238187
REACTOME_NEDDYLATION	REACTOME_NEDDYLATION	0.00230629	0.0282975	0.0231061	PSMD11/PSME3/PSMD12/UBE2D3/PSMD5	5	Brain_Frontal_Cortex_BA9	rs34238187
REACTOME_TCF_DEPENDENT_SIGNALING_IN_RESPONSE_TO_WNT	REACTOME_TCF_DEPENDENT_SIGNALING_IN_RESPONSE_TO_WNT	0.00230629	0.0282975	0.0231061	PSMD11/CSNK2A2/PSME3/PSMD12/PSMD5	5	Brain_Frontal_Cortex_BA9	rs34238187
GOMF_MOLECULAR_CARRIER_ACTIVITY	GOMF_MOLECULAR_CARRIER_ACTIVITY	0.00231525	0.0282975	0.0231444	KPNA2/KPNA4/KPNA1	3	Brain_Frontal_Cortex_BA9	rs34238187
REACTOME_SIGNALING_BY_INTERLEUKINS	REACTOME_SIGNALING_BY_INTERLEUKINS	0.00235133	0.0286003	0.0233752	PSMD11/PSME3/PSMD12/PSMD5/IL11RA/CDC42/HSPA8	7	Brain_Frontal_Cortex_BA9	rs34238187
GOBP_RESPONSE_TO_MOLECULE_OF_BACTERIAL_ORIGIN	GOBP_RESPONSE_TO_MOLECULE_OF_BACTERIAL_ORIGIN	0.00244885	0.029644	0.024105	HNRNPA0/NOCT/TNFRSF11A/PLAA/NR1H3/AKIRIN2	6	Brain_Frontal_Cortex_BA9	rs34238187
GOBP_VIRAL_LIFE_CYCLE	GOBP_VIRAL_LIFE_CYCLE	0.0025197	0.0302929	0.0246674	KPNA2/POM121C/PVR/KPNA1/CDC42/HSPA8	6	Brain_Frontal_Cortex_BA9	rs34238187
REACTOME_TRANSCRIPTIONAL_REGULATION_BY_RUNX1	REACTOME_TRANSCRIPTIONAL_REGULATION_BY_RUNX1	0.00252641	0.0302929	0.0246794	PSMD11/CSNK2A2/PSME3/PSMD12/PSMD5	5	Brain_Frontal_Cortex_BA9	rs34238187
GOBP_ERBB_SIGNALING_PATHWAY	GOBP_ERBB_SIGNALING_PATHWAY	0.00255909	0.0305401	0.0248368	PLCG1/LGMN/ADRA2A/CDC42	4	Brain_Frontal_Cortex_BA9	rs34238187
REACTOME_CIRCADIAN_CLOCK	REACTOME_CIRCADIAN_CLOCK	0.00262316	0.0307268	0.0251616	NOCT/NPAS2/NRIP1	3	Brain_Frontal_Cortex_BA9	rs34238187
GOBP_ACTIVATION_OF_INNATE_IMMUNE_RESPONSE	GOBP_ACTIVATION_OF_INNATE_IMMUNE_RESPONSE	0.00262331	0.0307268	0.0251616	PSMD11/PSME3/PSMD12/PSMD5	4	Brain_Frontal_Cortex_BA9	rs34238187
GOBP_PROTEIN_LOCALIZATION_TO_MITOCHONDRION	GOBP_PROTEIN_LOCALIZATION_TO_MITOCHONDRION	0.00262331	0.0307268	0.0251616	CSNK2A2/TIMM10B/GRPEL2/UBE2D3	4	Brain_Frontal_Cortex_BA9	rs34238187
REACTOME_BETA_CATENIN_INDEPENDENT_WNT_SIGNALING	REACTOME_BETA_CATENIN_INDEPENDENT_WNT_SIGNALING	0.00262331	0.0307268	0.0251616	PSMD11/PSME3/PSMD12/PSMD5	4	Brain_Frontal_Cortex_BA9	rs34238187
GOBP_POSITIVE_REGULATION_OF_CANONICAL_WNT_SIGNALING_PATHWAY	GOBP_POSITIVE_REGULATION_OF_CANONICAL_WNT_SIGNALING_PATHWAY	0.00268863	0.0313468	0.0256786	PSMD11/PSME3/PSMD12/PSMD5	4	Brain_Frontal_Cortex_BA9	rs34238187
GOBP_INOSITOL_PHOSPHATE_METABOLIC_PROCESS	GOBP_INOSITOL_PHOSPHATE_METABOLIC_PROCESS	0.00273113	0.0316172	0.0259187	NUDT4/IMPAD1/PLCG1	3	Brain_Frontal_Cortex_BA9	rs34238187
GOBP_REGULATION_OF_TRANSLATIONAL_FIDELITY	GOBP_REGULATION_OF_TRANSLATIONAL_FIDELITY	0.00273682	0.0316172	0.0259187	IARS1/YRDC	2	Brain_Frontal_Cortex_BA9	rs34238187
GOBP_RESPONSE_TO_EXTRACELLULAR_STIMULUS	GOBP_RESPONSE_TO_EXTRACELLULAR_STIMULUS	0.00277321	0.0318919	0.0262081	HMGCS1/EIF2S1/NOCT/KANK2/ALDH1A2/SLC25A25/HSPA8	7	Brain_Frontal_Cortex_BA9	rs34238187
GOBP_REGULATION_OF_CELL_CYCLE_PHASE_TRANSITION	GOBP_REGULATION_OF_CELL_CYCLE_PHASE_TRANSITION	0.00280542	0.0319717	0.026457	PSMD11/PSME3/HAUS2/KANK2/PSMD12/CEP78/PSMD5	7	Brain_Frontal_Cortex_BA9	rs34238187
GOBP_RNA_SPLICING	GOBP_RNA_SPLICING	0.00280542	0.0319717	0.026457	HNRNPA0/NOL3/ZPR1/STRAP/ECD/PRPF4/HSPA8	7	Brain_Frontal_Cortex_BA9	rs34238187
REACTOME_MITOTIC_G1_PHASE_AND_G1_S_TRANSITION	REACTOME_MITOTIC_G1_PHASE_AND_G1_S_TRANSITION	0.00282261	0.0320233	0.0265356	PSMD11/PSME3/PSMD12/PSMD5	4	Brain_Frontal_Cortex_BA9	rs34238187
REACTOME_SIGNALING_BY_HEDGEHOG	REACTOME_SIGNALING_BY_HEDGEHOG	0.00289128	0.0326559	0.027068	PSMD11/PSME3/PSMD12/PSMD5	4	Brain_Frontal_Cortex_BA9	rs34238187
GOBP_POSITIVE_REGULATION_OF_LIPASE_ACTIVITY	GOBP_POSITIVE_REGULATION_OF_LIPASE_ACTIVITY	0.00295521	0.0332297	0.0274587	PLAA/NR1H3/PLCG1	3	Brain_Frontal_Cortex_BA9	rs34238187
GOBP_DNA_TEMPLATED_TRANSCRIPTION_INITIATION	GOBP_DNA_TEMPLATED_TRANSCRIPTION_INITIATION	0.00301183	0.0336416	0.0278527	NR1H3/RARG/BCLAF1/TFB2M/MED8	5	Brain_Frontal_Cortex_BA9	rs34238187
GOBP_POST_TRANSLATIONAL_PROTEIN_MODIFICATION	GOBP_POST_TRANSLATIONAL_PROTEIN_MODIFICATION	0.00301843	0.0336416	0.0278527	PSMD11/PSME3/CRTAP/CKAP4/PSMD12/PSMD5	6	Brain_Frontal_Cortex_BA9	rs34238187
GOBP_REGULATION_OF_WNT_SIGNALING_PATHWAY	GOBP_REGULATION_OF_WNT_SIGNALING_PATHWAY	0.00318579	0.035351	0.0289924	PSMD11/PSME3/KPNA1/PSMD12/SCYL2/PSMD5	6	Brain_Frontal_Cortex_BA9	rs34238187
GOBP_DEPHOSPHORYLATION	GOBP_DEPHOSPHORYLATION	0.00325096	0.0358091	0.0294842	CSRNP2/SSH3/CHP1/IMPAD1/NOCT/LPIN3/PTPRE	7	Brain_Frontal_Cortex_BA9	rs34238187
GOMF_PHOSPHORIC_ESTER_HYDROLASE_ACTIVITY	GOMF_PHOSPHORIC_ESTER_HYDROLASE_ACTIVITY	0.00327201	0.0358091	0.0295609	SSH3/IMPAD1/NOCT/LPIN3/PTPRE/PLCG1	6	Brain_Frontal_Cortex_BA9	rs34238187
GOBP_IMMUNE_RESPONSE_TO_TUMOR_CELL	GOBP_IMMUNE_RESPONSE_TO_TUMOR_CELL	0.00331045	0.0358091	0.0295609	PVR/FBXO38	2	Brain_Frontal_Cortex_BA9	rs34238187
GOBP_PINOCYTOSIS	GOBP_PINOCYTOSIS	0.00331045	0.0358091	0.0295609	NR1H3/CDC42	2	Brain_Frontal_Cortex_BA9	rs34238187
REACTOME_RA_BIOSYNTHESIS_PATHWAY	REACTOME_RA_BIOSYNTHESIS_PATHWAY	0.00331045	0.0358091	0.0295609	RDH11/ALDH1A2	2	Brain_Frontal_Cortex_BA9	rs34238187
KEGG_VEGF_SIGNALING_PATHWAY	KEGG_VEGF_SIGNALING_PATHWAY	0.00331199	0.0358091	0.0295609	CHP1/PLCG1/CDC42	3	Brain_Frontal_Cortex_BA9	rs34238187
GOBP_NEGATIVE_REGULATION_OF_CELLULAR_CATABOLIC_PROCESS	GOBP_NEGATIVE_REGULATION_OF_CELLULAR_CATABOLIC_PROCESS	0.00333353	0.0358886	0.0295772	HNRNPA0/LARP4B/CSNK2A2/NOCT/NAF1	5	Brain_Frontal_Cortex_BA9	rs34238187
REACTOME_INFLUENZA_INFECTION	REACTOME_INFLUENZA_INFECTION	0.00340423	0.0364945	0.0300268	KPNA2/KPNA4/POM121C/KPNA1	4	Brain_Frontal_Cortex_BA9	rs34238187
GOBP_ALCOHOL_METABOLIC_PROCESS	GOBP_ALCOHOL_METABOLIC_PROCESS	0.00354116	0.0378023	0.0308599	NUDT4/HMGCS1/IMPAD1/RDH11/ALDH1A2/PLCG1	6	Brain_Frontal_Cortex_BA9	rs34238187
REACTOME_CLASS_I_MHC_MEDIATED_ANTIGEN_PROCESSING_PRESENTATION	REACTOME_CLASS_I_MHC_MEDIATED_ANTIGEN_PROCESSING_PRESENTATION	0.00372952	0.0396458	0.0319866	PSMD11/PSME3/PSMD12/UBE2D3/PSMD5/RLIM	6	Brain_Frontal_Cortex_BA9	rs34238187
GOBP_SULFUR_COMPOUND_METABOLIC_PROCESS	GOBP_SULFUR_COMPOUND_METABOLIC_PROCESS	0.00377775	0.0399905	0.0323386	HMGCS1/IMPAD1/ABHD14B/PRELP/CHPF2/B4GALT5	6	Brain_Frontal_Cortex_BA9	rs34238187
REACTOME_S_PHASE	REACTOME_S_PHASE	0.00380638	0.0401256	0.0324909	PSMD11/PSME3/PSMD12/PSMD5	4	Brain_Frontal_Cortex_BA9	rs34238187
GOMF_LIGASE_ACTIVITY	GOMF_LIGASE_ACTIVITY	0.0038905	0.0408422	0.0329588	CARS1/IARS1/YARS1/WARS1	4	Brain_Frontal_Cortex_BA9	rs34238187
GOBP_3_UTR_MEDIATED_MRNA_STABILIZATION	GOBP_3_UTR_MEDIATED_MRNA_STABILIZATION	0.00393522	0.0409251	0.0331503	HNRNPA0/LARP4B	2	Brain_Frontal_Cortex_BA9	rs34238187
REACTOME_CYTOSOLIC_SULFONATION_OF_SMALL_MOLECULES	REACTOME_CYTOSOLIC_SULFONATION_OF_SMALL_MOLECULES	0.00393522	0.0409251	0.0331503	IMPAD1/ABHD14B	2	Brain_Frontal_Cortex_BA9	rs34238187
GOBP_NEGATIVE_REGULATION_OF_RESPONSE_TO_CYTOKINE_STIMULUS	GOBP_NEGATIVE_REGULATION_OF_RESPONSE_TO_CYTOKINE_STIMULUS	0.0039631	0.0409251	0.0332438	NOL3/YTHDF2/NR1H3	3	Brain_Frontal_Cortex_BA9	rs34238187
GOBP_PROTEIN_SUMOYLATION	GOBP_PROTEIN_SUMOYLATION	0.0039631	0.0409251	0.0332438	POM121C/GNL3/RWDD3	3	Brain_Frontal_Cortex_BA9	rs34238187
GOBP_DEVELOPMENTAL_MATURATION	GOBP_DEVELOPMENTAL_MATURATION	0.00405	0.0416525	0.0336758	YTHDF2/ALDH1A2/B4GALT5/RND1/BLOC1S6	5	Brain_Frontal_Cortex_BA9	rs34238187
GOBP_NEGATIVE_REGULATION_OF_CELL_CYCLE_PHASE_TRANSITION	GOBP_NEGATIVE_REGULATION_OF_CELL_CYCLE_PHASE_TRANSITION	0.00411429	0.0421424	0.0340217	PSMD11/PSME3/KANK2/PSMD12/PSMD5	5	Brain_Frontal_Cortex_BA9	rs34238187
REACTOME_SIGNALING_BY_THE_B_CELL_RECEPTOR_BCR	REACTOME_SIGNALING_BY_THE_B_CELL_RECEPTOR_BCR	0.0041504	0.0423408	0.0342259	PSMD11/PSME3/PSMD12/PSMD5	4	Brain_Frontal_Cortex_BA9	rs34238187
GOBP_3_PHOSPHOADENOSINE_5_PHOSPHOSULFATE_METABOLIC_PROCESS	GOBP_3_PHOSPHOADENOSINE_5_PHOSPHOSULFATE_METABOLIC_PROCESS	0.00426651	0.0430051	0.0347692	IMPAD1/ABHD14B	2	Brain_Frontal_Cortex_BA9	rs34238187
GOBP_REGULATION_OF_PROTEIN_SUMOYLATION	GOBP_REGULATION_OF_PROTEIN_SUMOYLATION	0.00426651	0.0430051	0.0347692	GNL3/RWDD3	2	Brain_Frontal_Cortex_BA9	rs34238187
GOBP_RESPONSE_TO_ACIDIC_PH	GOBP_RESPONSE_TO_ACIDIC_PH	0.00426651	0.0430051	0.0347692	CHP1/LGMN	2	Brain_Frontal_Cortex_BA9	rs34238187
GOBP_CELLULAR_RESPONSE_TO_TOPOLOGICALLY_INCORRECT_PROTEIN	GOBP_CELLULAR_RESPONSE_TO_TOPOLOGICALLY_INCORRECT_PROTEIN	0.00433004	0.0433004	0.0351277	GFPT1/DNAJB9/EIF2S1/HSPA8	4	Brain_Frontal_Cortex_BA9	rs34238187
REACTOME_G2_M_CHECKPOINTS	REACTOME_G2_M_CHECKPOINTS	0.00433004	0.0433004	0.0351277	PSMD11/PSME3/PSMD12/PSMD5	4	Brain_Frontal_Cortex_BA9	rs34238187
GOBP_INTRACELLULAR_RECEPTOR_SIGNALING_PATHWAY	GOBP_INTRACELLULAR_RECEPTOR_SIGNALING_PATHWAY	0.00451545	0.0448003	0.0362075	KANK2/NR1H3/ALDH1A2/RARG/NPLOC4	5	Brain_Frontal_Cortex_BA9	rs34238187
GOBP_MITOCHONDRIAL_TRANSPORT	GOBP_MITOCHONDRIAL_TRANSPORT	0.00451545	0.0448003	0.0362075	NOL3/CSNK2A2/TIMM10B/GRPEL2/UBE2D3	5	Brain_Frontal_Cortex_BA9	rs34238187
GOMF_RETINOIC_ACID_RECEPTOR_BINDING	GOMF_RETINOIC_ACID_RECEPTOR_BINDING	0.00461029	0.0454226	0.0367689	RARG/NRIP1	2	Brain_Frontal_Cortex_BA9	rs34238187
REACTOME_DISEASES_OF_SIGNAL_TRANSDUCTION_BY_GROWTH_FACTOR_RECEPTORS_AND_SECOND_MESSENGERS	REACTOME_DISEASES_OF_SIGNAL_TRANSDUCTION_BY_GROWTH_FACTOR_RECEPTORS_AND_SECOND_MESSENGERS	0.00461408	0.0454226	0.0367689	PSMD11/PSME3/PSMD12/PLCG1/PSMD5/SPRED3	6	Brain_Frontal_Cortex_BA9	rs34238187
GOMF_PHOSPHATASE_ACTIVITY	GOMF_PHOSPHATASE_ACTIVITY	0.00465514	0.0456493	0.0370633	SSH3/IMPAD1/NOCT/LPIN3/PTPRE	5	Brain_Frontal_Cortex_BA9	rs34238187
REACTOME_REGULATION_OF_EXPRESSION_OF_SLITS_AND_ROBOS	REACTOME_REGULATION_OF_EXPRESSION_OF_SLITS_AND_ROBOS	0.0047049	0.045959	0.0372616	PSMD11/PSME3/PSMD12/PSMD5	4	Brain_Frontal_Cortex_BA9	rs34238187
REACTOME_BMAL1_CLOCK_NPAS2_ACTIVATES_CIRCADIAN_GENE_EXPRESSION	REACTOME_BMAL1_CLOCK_NPAS2_ACTIVATES_CIRCADIAN_GENE_EXPRESSION	0.00496644	0.0480727	0.0388204	NOCT/NPAS2	2	Brain_Frontal_Cortex_BA9	rs34238187
REACTOME_METABOLISM_OF_PORPHYRINS	REACTOME_METABOLISM_OF_PORPHYRINS	0.00496644	0.0480727	0.0388204	ALAS1/COX10	2	Brain_Frontal_Cortex_BA9	rs34238187
GOBP_NEGATIVE_REGULATION_OF_MRNA_METABOLIC_PROCESS	GOBP_NEGATIVE_REGULATION_OF_MRNA_METABOLIC_PROCESS	0.00499728	0.0480727	0.0389133	HNRNPA0/LARP4B/NOCT	3	Brain_Frontal_Cortex_BA9	rs34238187
KEGG_ANTIGEN_PROCESSING_AND_PRESENTATION	KEGG_ANTIGEN_PROCESSING_AND_PRESENTATION	0.00499728	0.0480727	0.0389133	PSME3/LGMN/HSPA8	3	Brain_Frontal_Cortex_BA9	rs34238187
GOBP_RESPONSE_TO_VITAMIN	GOBP_RESPONSE_TO_VITAMIN	0.005157	0.0494213	0.0398255	HMGCS1/KANK2/ALDH1A2	3	Brain_Frontal_Cortex_BA9	rs34238187
GOBP_PHOSPHATIDYLCHOLINE_METABOLIC_PROCESS	GOBP_PHOSPHATIDYLCHOLINE_METABOLIC_PROCESS	0.00531978	0.0496221	0.0405126	CSNK2A2/NR1H3/LPIN3	3	Brain_Frontal_Cortex_BA9	rs34238187
GOBP_CHONDROCYTE_DEVELOPMENT	GOBP_CHONDROCYTE_DEVELOPMENT	0.00533486	0.0496221	0.0405126	IMPAD1/RARG	2	Brain_Frontal_Cortex_BA9	rs34238187
GOBP_GLYCOSPHINGOLIPID_BIOSYNTHETIC_PROCESS	GOBP_GLYCOSPHINGOLIPID_BIOSYNTHETIC_PROCESS	0.00533486	0.0496221	0.0405126	UGCG/B4GALT5	2	Brain_Frontal_Cortex_BA9	rs34238187
GOBP_ISOPRENOID_BIOSYNTHETIC_PROCESS	GOBP_ISOPRENOID_BIOSYNTHETIC_PROCESS	0.00533486	0.0496221	0.0405126	HMGCS1/ALDH1A2	2	Brain_Frontal_Cortex_BA9	rs34238187
GOBP_KERATAN_SULFATE_BIOSYNTHETIC_PROCESS	GOBP_KERATAN_SULFATE_BIOSYNTHETIC_PROCESS	0.00533486	0.0496221	0.0405126	PRELP/B4GALT5	2	Brain_Frontal_Cortex_BA9	rs34238187
GOBP_TETRAPYRROLE_BIOSYNTHETIC_PROCESS	GOBP_TETRAPYRROLE_BIOSYNTHETIC_PROCESS	0.00533486	0.0496221	0.0405126	ALAS1/COX10	2	Brain_Frontal_Cortex_BA9	rs34238187
REACTOME_KERATAN_SULFATE_BIOSYNTHESIS	REACTOME_KERATAN_SULFATE_BIOSYNTHESIS	0.00533486	0.0496221	0.0405126	PRELP/B4GALT5	2	Brain_Frontal_Cortex_BA9	rs34238187
REACTOME_SYNTHESIS_OF_PC	REACTOME_SYNTHESIS_OF_PC	0.00533486	0.0496221	0.0405126	CSNK2A2/LPIN3	2	Brain_Frontal_Cortex_BA9	rs34238187
GOBP_MRNA_TRANSPORT	GOBP_MRNA_TRANSPORT	0.000921356	0.0332929	0.0426509	CETN3/CPSF2	2	Brain_Hypothalamus	rs34238187
GOBP_ESTABLISHMENT_OF_RNA_LOCALIZATION	GOBP_ESTABLISHMENT_OF_RNA_LOCALIZATION	0.00160575	0.0332929	0.0426509	CETN3/CPSF2	2	Brain_Hypothalamus	rs34238187
GOBP_RNA_LOCALIZATION	GOBP_RNA_LOCALIZATION	0.00216889	0.0332929	0.0527909	CETN3/CPSF2	2	Brain_Hypothalamus	rs34238187
GOBP_NUCLEOBASE_CONTAINING_COMPOUND_TRANSPORT	GOBP_NUCLEOBASE_CONTAINING_COMPOUND_TRANSPORT	0.00252979	0.0332929	0.0527909	CETN3/CPSF2	2	Brain_Hypothalamus	rs34238187
GOBP_RNA_SPLICING_VIA_TRANSESTERIFICATION_REACTIONS	GOBP_RNA_SPLICING_VIA_TRANSESTERIFICATION_REACTIONS	0.0057536	0.0332929	0.0527909	NCBP2L/CPSF2	2	Brain_Hypothalamus	rs34238187
GOBP_RNA_SPLICING	GOBP_RNA_SPLICING	0.00878054	0.0332929	0.0527909	NCBP2L/CPSF2	2	Brain_Hypothalamus	rs34238187
GOMF_ACID_THIOL_LIGASE_ACTIVITY	GOMF_ACID_THIOL_LIGASE_ACTIVITY	1.54284e-06	0.00489234	0.00122918	AASDH/ACSF2/SLC27A1/ACSM5/ACSL4	5	Brain_Nucleus_accumbens_basal_ganglia	rs34238187
GOMF_LIGASE_ACTIVITY_FORMING_CARBON_SULFUR_BONDS	GOMF_LIGASE_ACTIVITY_FORMING_CARBON_SULFUR_BONDS	6.45798e-06	0.0102391	0.00239366	AASDH/ACSF2/SLC27A1/ACSM5/ACSL4	5	Brain_Nucleus_accumbens_basal_ganglia	rs34238187
GOMF_FATTY_ACID_LIGASE_ACTIVITY	GOMF_FATTY_ACID_LIGASE_ACTIVITY	1.10147e-05	0.0116426	0.00337518	ACSF2/SLC27A1/ACSM5/ACSL4	4	Brain_Nucleus_accumbens_basal_ganglia	rs34238187
GOMF_AMIDE_TRANSMEMBRANE_TRANSPORTER_ACTIVITY	GOMF_AMIDE_TRANSMEMBRANE_TRANSPORTER_ACTIVITY	2.54644e-05	0.0201869	0.00595743	SLC14A2/SLC27A1/DISP1/SLC15A3/TIMM17A	5	Brain_Nucleus_accumbens_basal_ganglia	rs34238187
GOBP_FATTY_ACID_METABOLIC_PROCESS	GOBP_FATTY_ACID_METABOLIC_PROCESS	5.1898e-05	0.0276932	0.00620003	NR1H3/ASAH2/EPHX1/AASDH/ACSF2/SLC27A1/PLIN5/ACSM5/ACSL4/ABHD1/ACACB	11	Brain_Nucleus_accumbens_basal_ganglia	rs34238187
GOBP_REGULATION_OF_LIPID_BIOSYNTHETIC_PROCESS	GOBP_REGULATION_OF_LIPID_BIOSYNTHETIC_PROCESS	5.23996e-05	0.0276932	0.00620003	NR1H3/SMPD3/SLC27A1/SQLE/PLIN5/RDH10/LSS/ACACB	8	Brain_Nucleus_accumbens_basal_ganglia	rs34238187
GOBP_RIBONUCLEOSIDE_MONOPHOSPHATE_BIOSYNTHETIC_PROCESS	GOBP_RIBONUCLEOSIDE_MONOPHOSPHATE_BIOSYNTHETIC_PROCESS	6.57352e-05	0.029778	0.00720706	RFK/UPRT/PRPS2/UCK2	4	Brain_Nucleus_accumbens_basal_ganglia	rs34238187
GOBP_POSITIVE_REGULATION_OF_TRIGLYCERIDE_BIOSYNTHETIC_PROCESS	GOBP_POSITIVE_REGULATION_OF_TRIGLYCERIDE_BIOSYNTHETIC_PROCESS	8.99255e-05	0.0328621	0.00942682	NR1H3/SLC27A1/PLIN5	3	Brain_Nucleus_accumbens_basal_ganglia	rs34238187
GOMF_LIGASE_ACTIVITY	GOMF_LIGASE_ACTIVITY	9.32698e-05	0.0328621	0.00960882	AASDH/ACSF2/SLC27A1/IARS1/ACSM5/ACSL4/ACACB	7	Brain_Nucleus_accumbens_basal_ganglia	rs34238187
GOBP_REGULATION_OF_VASCULOGENESIS	GOBP_REGULATION_OF_VASCULOGENESIS	0.00013704	0.040781	0.012694	HEY2/RAMP2/RIN2	3	Brain_Nucleus_accumbens_basal_ganglia	rs34238187
GOBP_TRIGLYCERIDE_BIOSYNTHETIC_PROCESS	GOBP_TRIGLYCERIDE_BIOSYNTHETIC_PROCESS	0.000152399	0.040781	0.0133915	NR1H3/SLC27A1/PLIN5/ACSL4	4	Brain_Nucleus_accumbens_basal_ganglia	rs34238187
GOBP_NEGATIVE_REGULATION_OF_SYSTEMIC_ARTERIAL_BLOOD_PRESSURE	GOBP_NEGATIVE_REGULATION_OF_SYSTEMIC_ARTERIAL_BLOOD_PRESSURE	0.000165618	0.040781	0.0138417	KCNK6/GPR37L1/ADRB2	3	Brain_Nucleus_accumbens_basal_ganglia	rs34238187
GOBP_NUCLEOSIDE_MONOPHOSPHATE_BIOSYNTHETIC_PROCESS	GOBP_NUCLEOSIDE_MONOPHOSPHATE_BIOSYNTHETIC_PROCESS	0.000167188	0.040781	0.0138417	RFK/UPRT/PRPS2/UCK2	4	Brain_Nucleus_accumbens_basal_ganglia	rs34238187
GOMF_ANION_TRANSMEMBRANE_TRANSPORTER_ACTIVITY	GOMF_ANION_TRANSMEMBRANE_TRANSPORTER_ACTIVITY	0.000202965	0.0449508	0.0152902	SLC14A2/LRRC8B/SLC27A1/SLCO5A1/DISP1/SLC9A9/SLC16A4/SLC44A2/SLC15A3/CD320/TIMM17A	11	Brain_Nucleus_accumbens_basal_ganglia	rs34238187
GOBP_POSITIVE_REGULATION_OF_LIPID_BIOSYNTHETIC_PROCESS	GOBP_POSITIVE_REGULATION_OF_LIPID_BIOSYNTHETIC_PROCESS	0.000212634	0.0449508	0.0152902	NR1H3/SMPD3/SLC27A1/PLIN5/RDH10	5	Brain_Nucleus_accumbens_basal_ganglia	rs34238187
GOMF_GUANYL_NUCLEOTIDE_BINDING	GOMF_GUANYL_NUCLEOTIDE_BINDING	0.000275577	0.0454848	0.0152902	UPRT/ACSM5/REM2/GFM2/RAB30/PRPS2/PDE10A/GNL3/NOLC1/GNAI2	10	Brain_Nucleus_accumbens_basal_ganglia	rs34238187
GOBP_RIBOSE_PHOSPHATE_BIOSYNTHETIC_PROCESS	GOBP_RIBOSE_PHOSPHATE_BIOSYNTHETIC_PROCESS	0.000281195	0.0454848	0.0152902	DLAT/RFK/UPRT/ACSL4/PRPS2/ACACB/UCK2	7	Brain_Nucleus_accumbens_basal_ganglia	rs34238187
GOBP_NUCLEOSIDE_BISPHOSPHATE_METABOLIC_PROCESS	GOBP_NUCLEOSIDE_BISPHOSPHATE_METABOLIC_PROCESS	0.000299775	0.0454848	0.0152902	DLAT/ABHD14B/ACSF2/ACSM5/ACSL4/ACACB	6	Brain_Nucleus_accumbens_basal_ganglia	rs34238187
GOBP_NEUTRAL_LIPID_BIOSYNTHETIC_PROCESS	GOBP_NEUTRAL_LIPID_BIOSYNTHETIC_PROCESS	0.000301224	0.0454848	0.0152902	NR1H3/SLC27A1/PLIN5/ACSL4	4	Brain_Nucleus_accumbens_basal_ganglia	rs34238187
GOBP_POSITIVE_REGULATION_OF_NEURAL_PRECURSOR_CELL_PROLIFERATION	GOBP_POSITIVE_REGULATION_OF_NEURAL_PRECURSOR_CELL_PROLIFERATION	0.000301224	0.0454848	0.0152902	FZD9/SMO/GPR37L1/GNAI2	4	Brain_Nucleus_accumbens_basal_ganglia	rs34238187
GOBP_PYRIMIDINE_NUCLEOTIDE_METABOLIC_PROCESS	GOBP_PYRIMIDINE_NUCLEOTIDE_METABOLIC_PROCESS	0.000301224	0.0454848	0.0152902	UPRT/ENTPD4/MBD4/UCK2	4	Brain_Nucleus_accumbens_basal_ganglia	rs34238187
GOBP_REGULATION_OF_TRIGLYCERIDE_BIOSYNTHETIC_PROCESS	GOBP_REGULATION_OF_TRIGLYCERIDE_BIOSYNTHETIC_PROCESS	0.000317845	0.045528	0.0152902	NR1H3/SLC27A1/PLIN5	3	Brain_Nucleus_accumbens_basal_ganglia	rs34238187
GOBP_NUCLEOSIDE_PHOSPHATE_BIOSYNTHETIC_PROCESS	GOBP_NUCLEOSIDE_PHOSPHATE_BIOSYNTHETIC_PROCESS	0.000345494	0.045528	0.015699	DLAT/RFK/QPRT/UPRT/ACSL4/PRPS2/ACACB/UCK2	8	Brain_Nucleus_accumbens_basal_ganglia	rs34238187
REACTOME_G_ALPHA_S_SIGNALLING_EVENTS	REACTOME_G_ALPHA_S_SIGNALLING_EVENTS	0.000348585	0.045528	0.0157794	GHRHR/RAMP2/ADRB2/PDE10A/ADCYAP1R1/GNAI2	6	Brain_Nucleus_accumbens_basal_ganglia	rs34238187
REACTOME_CLASS_B_2_SECRETIN_FAMILY_RECEPTORS	REACTOME_CLASS_B_2_SECRETIN_FAMILY_RECEPTORS	0.00035894	0.045528	0.016126	FZD9/GHRHR/RAMP2/SMO/ADCYAP1R1	5	Brain_Nucleus_accumbens_basal_ganglia	rs34238187
GOBP_POSITIVE_REGULATION_OF_TRIGLYCERIDE_METABOLIC_PROCESS	GOBP_POSITIVE_REGULATION_OF_TRIGLYCERIDE_METABOLIC_PROCESS	0.000419246	0.0493898	0.0179487	NR1H3/SLC27A1/PLIN5	3	Brain_Nucleus_accumbens_basal_ganglia	rs34238187
GOBP_INTRACELLULAR_RECEPTOR_SIGNALING_PATHWAY	GOBP_INTRACELLULAR_RECEPTOR_SIGNALING_PATHWAY	0.000420538	0.0493898	0.0179487	NR1H3/NR2F1/GHRHR/UBE3A/PLIN5/IRF3/RNF135/SLC15A3	8	Brain_Nucleus_accumbens_basal_ganglia	rs34238187
GOBP_HETEROCHROMATIN_ORGANIZATION	GOBP_HETEROCHROMATIN_ORGANIZATION	0.000217085	0.0432186	0.0391088	H3C4/MPHOSPH8	2	Brain_Substantia_nigra	rs34238187
GOBP_NEGATIVE_REGULATION_OF_GENE_EXPRESSION_EPIGENETIC	GOBP_NEGATIVE_REGULATION_OF_GENE_EXPRESSION_EPIGENETIC	0.000528806	0.0432186	0.0391088	H3C4/MPHOSPH8	2	Brain_Substantia_nigra	rs34238187
GOBP_NEGATIVE_REGULATION_OF_PROTEIN_CONTAINING_COMPLEX_ASSEMBLY	GOBP_NEGATIVE_REGULATION_OF_PROTEIN_CONTAINING_COMPLEX_ASSEMBLY	0.000643743	0.0432186	0.0391088	TRIM9/DNAJC15	2	Brain_Substantia_nigra	rs34238187
GOBP_CHROMATIN_ORGANIZATION_INVOLVED_IN_REGULATION_OF_TRANSCRIPTION	GOBP_CHROMATIN_ORGANIZATION_INVOLVED_IN_REGULATION_OF_TRANSCRIPTION	0.000800344	0.0432186	0.0391088	H3C4/MPHOSPH8	2	Brain_Substantia_nigra	rs34238187
GOBP_REGULATION_OF_GENE_EXPRESSION_EPIGENETIC	GOBP_REGULATION_OF_GENE_EXPRESSION_EPIGENETIC	0.00140964	0.0465377	0.0391088	H3C4/MPHOSPH8	2	Brain_Substantia_nigra	rs34238187
GOBP_CHROMATIN_REMODELING	GOBP_CHROMATIN_REMODELING	0.00146444	0.0465377	0.0391088	H3C4/MPHOSPH8	2	Brain_Substantia_nigra	rs34238187
GOBP_CHROMATIN_ASSEMBLY_OR_DISASSEMBLY	GOBP_CHROMATIN_ASSEMBLY_OR_DISASSEMBLY	0.0016349	0.0465377	0.0421017	H3C4/MPHOSPH8	2	Brain_Substantia_nigra	rs34238187
GOBP_DNA_PACKAGING	GOBP_DNA_PACKAGING	0.00192327	0.0465377	0.0439972	H3C4/MPHOSPH8	2	Brain_Substantia_nigra	rs34238187
GOMF_HISTONE_BINDING	GOMF_HISTONE_BINDING	0.00193907	0.0465377	0.0439972	L3MBTL3/MPHOSPH8	2	Brain_Substantia_nigra	rs34238187
GOBP_PEROXISOME_FISSION	GOBP_PEROXISOME_FISSION	3.17688e-05	0.0266858	0.0138863	SEC16B/CRYZL2P-SEC16B	2	Breast_Mammary_Tissue	rs34238187
GOBP_POSITIVE_REGULATION_OF_PROTEIN_EXIT_FROM_ENDOPLASMIC_RETICULUM	GOBP_POSITIVE_REGULATION_OF_PROTEIN_EXIT_FROM_ENDOPLASMIC_RETICULUM	7.39288e-05	0.0297655	0.0258517	SEC16B/CRYZL2P-SEC16B	2	Breast_Mammary_Tissue	rs34238187
GOBP_NEGATIVE_REGULATION_OF_STEM_CELL_DIFFERENTIATION	GOBP_NEGATIVE_REGULATION_OF_STEM_CELL_DIFFERENTIATION	0.000147383	0.0297655	0.0284762	TRIM6/ZFP36L2	2	Breast_Mammary_Tissue	rs34238187
GOMF_EXTRACELLULAR_MATRIX_STRUCTURAL_CONSTITUENT_CONFERRING_COMPRESSION_RESISTANCE	GOMF_EXTRACELLULAR_MATRIX_STRUCTURAL_CONSTITUENT_CONFERRING_COMPRESSION_RESISTANCE	0.000162034	0.0297655	0.0284762	VCAN/CHADL	2	Breast_Mammary_Tissue	rs34238187
GOBP_RESPONSE_TO_STEROID_HORMONE	GOBP_RESPONSE_TO_STEROID_HORMONE	0.000177175	0.0297655	0.0284762	SREBF1/ZFP36L2/DNMT3B/TFPI	4	Breast_Mammary_Tissue	rs34238187
GOBP_REGULATION_OF_PROTEIN_EXIT_FROM_ENDOPLASMIC_RETICULUM	GOBP_REGULATION_OF_PROTEIN_EXIT_FROM_ENDOPLASMIC_RETICULUM	0.000245549	0.0307193	0.0284762	SEC16B/CRYZL2P-SEC16B	2	Breast_Mammary_Tissue	rs34238187
GOBP_RESPONSE_TO_PURINE_CONTAINING_COMPOUND	GOBP_RESPONSE_TO_PURINE_CONTAINING_COMPOUND	0.000255994	0.0307193	0.0284762	SREBF1/TRPV1/DNMT3B	3	Breast_Mammary_Tissue	rs34238187
GOMF_DNA_BINDING_TRANSCRIPTION_REPRESSOR_ACTIVITY	GOMF_DNA_BINDING_TRANSCRIPTION_REPRESSOR_ACTIVITY	0.00122297	0.0404069	0.00931501	ZNF77/ZBTB16	2	Cells_EBV-transformed_lymphocytes	rs34238187
GOBP_PEPTIDYL_LYSINE_ACETYLATION	GOBP_PEPTIDYL_LYSINE_ACETYLATION	0.000780243	0.0482037	0.0195709	TRIM16/SET	2	Colon_Transverse	rs34238187
GOBP_PROTEIN_ACETYLATION	GOBP_PROTEIN_ACETYLATION	0.00110211	0.0482037	0.0195709	TRIM16/SET	2	Colon_Transverse	rs34238187
GOBP_PROTEIN_ACYLATION	GOBP_PROTEIN_ACYLATION	0.00160593	0.0482037	0.0195709	TRIM16/SET	2	Colon_Transverse	rs34238187
GOBP_PROTEIN_CONTAINING_COMPLEX_DISASSEMBLY	GOBP_PROTEIN_CONTAINING_COMPLEX_DISASSEMBLY	0.00291947	0.0482037	0.0195709	MRPS6/SET	2	Colon_Transverse	rs34238187
GOBP_PEPTIDYL_LYSINE_MODIFICATION	GOBP_PEPTIDYL_LYSINE_MODIFICATION	0.00411579	0.0482037	0.0195709	TRIM16/SET	2	Colon_Transverse	rs34238187
GOBP_COVALENT_CHROMATIN_MODIFICATION	GOBP_COVALENT_CHROMATIN_MODIFICATION	0.0056701	0.0482037	0.0195709	TRIM16/SET	2	Colon_Transverse	rs34238187
REACTOME_SRP_DEPENDENT_COTRANSLATIONAL_PROTEIN_TARGETING_TO_MEMBRANE	REACTOME_SRP_DEPENDENT_COTRANSLATIONAL_PROTEIN_TARGETING_TO_MEMBRANE	1.4262e-37	8.99983e-35	3.34114e-34	RPL37/RPL38/RPS15/SEC11A/RPS27A/RPL11/UBA52/RPL8/RPL39/RPL36A/RPS28/RPL32/RPLP2/RPS17/RPS27/RPL23A/RPL28/RPS15A/RPS19/RPS21	20	Esophagus_Gastroesophageal_Junction	rs34238187
KEGG_RIBOSOME	KEGG_RIBOSOME	1.75606e-37	8.99983e-35	3.34114e-34	RPL37/RPL38/RPS15/RPS27A/RPL11/UBA52/RPL8/RPL39/RPL36A/RPS28/RPL32/RPLP2/RPS17/RPS27/RPL23A/RPL28/RPS15A/RPS19/RPS21	19	Esophagus_Gastroesophageal_Junction	rs34238187
REACTOME_EUKARYOTIC_TRANSLATION_ELONGATION	REACTOME_EUKARYOTIC_TRANSLATION_ELONGATION	7.06318e-37	2.41325e-34	6.71931e-34	RPL37/RPL38/RPS15/RPS27A/RPL11/UBA52/RPL8/RPL39/RPL36A/RPS28/RPL32/RPLP2/RPS17/RPS27/RPL23A/RPL28/RPS15A/RPS19/RPS21	19	Esophagus_Gastroesophageal_Junction	rs34238187
REACTOME_RESPONSE_OF_EIF2AK4_GCN2_TO_AMINO_ACID_DEFICIENCY	REACTOME_RESPONSE_OF_EIF2AK4_GCN2_TO_AMINO_ACID_DEFICIENCY	3.89923e-36	9.99177e-34	2.96752e-33	RPL37/RPL38/RPS15/RPS27A/RPL11/UBA52/RPL8/RPL39/RPL36A/RPS28/RPL32/RPLP2/RPS17/RPS27/RPL23A/RPL28/RPS15A/RPS19/RPS21	19	Esophagus_Gastroesophageal_Junction	rs34238187
GOBP_COTRANSLATIONAL_PROTEIN_TARGETING_TO_MEMBRANE	GOBP_COTRANSLATIONAL_PROTEIN_TARGETING_TO_MEMBRANE	1.05343e-35	2.15953e-33	5.72654e-33	RPL37/RPL38/RPS15/RPS27A/RPL11/UBA52/RPL8/RPL39/RPL36A/RPS28/RPL32/RPLP2/RPS17/RPS27/RPL23A/RPL28/RPS15A/RPS19/RPS21	19	Esophagus_Gastroesophageal_Junction	rs34238187
REACTOME_NONSENSE_MEDIATED_DECAY_NMD	REACTOME_NONSENSE_MEDIATED_DECAY_NMD	5.57476e-35	9.52354e-33	2.65168e-32	RPL37/RPL38/RPS15/RPS27A/RPL11/UBA52/RPL8/RPL39/RPL36A/RPS28/RPL32/RPLP2/RPS17/RPS27/RPL23A/RPL28/RPS15A/RPS19/RPS21	19	Esophagus_Gastroesophageal_Junction	rs34238187
REACTOME_SELENOAMINO_ACID_METABOLISM	REACTOME_SELENOAMINO_ACID_METABOLISM	7.91886e-35	1.15955e-32	3.34815e-32	RPL37/RPL38/RPS15/RPS27A/RPL11/UBA52/RPL8/RPL39/RPL36A/RPS28/RPL32/RPLP2/RPS17/RPS27/RPL23A/RPL28/RPS15A/RPS19/RPS21	19	Esophagus_Gastroesophageal_Junction	rs34238187
GOBP_NUCLEAR_TRANSCRIBED_MRNA_CATABOLIC_PROCESS_NONSENSE_MEDIATED_DECAY	GOBP_NUCLEAR_TRANSCRIBED_MRNA_CATABOLIC_PROCESS_NONSENSE_MEDIATED_DECAY	1.11763e-34	1.27286e-32	3.86627e-32	RPL37/RPL38/RPS15/RPS27A/RPL11/UBA52/RPL8/RPL39/RPL36A/RPS28/RPL32/RPLP2/RPS17/RPS27/RPL23A/RPL28/RPS15A/RPS19/RPS21	19	Esophagus_Gastroesophageal_Junction	rs34238187
REACTOME_EUKARYOTIC_TRANSLATION_INITIATION	REACTOME_EUKARYOTIC_TRANSLATION_INITIATION	1.11763e-34	1.27286e-32	3.86627e-32	RPL37/RPL38/RPS15/RPS27A/RPL11/UBA52/RPL8/RPL39/RPL36A/RPS28/RPL32/RPLP2/RPS17/RPS27/RPL23A/RPL28/RPS15A/RPS19/RPS21	19	Esophagus_Gastroesophageal_Junction	rs34238187
GOBP_ESTABLISHMENT_OF_PROTEIN_LOCALIZATION_TO_ENDOPLASMIC_RETICULUM	GOBP_ESTABLISHMENT_OF_PROTEIN_LOCALIZATION_TO_ENDOPLASMIC_RETICULUM	1.32465e-34	1.35776e-32	4.20052e-32	RPL37/RPL38/RPS15/RPS27A/RPL11/UBA52/RPL8/RPL39/RPL36A/RPS28/RPL32/RPLP2/RPS17/RPS27/RPL23A/RPL28/RPS15A/RPS19/RPS21	19	Esophagus_Gastroesophageal_Junction	rs34238187
REACTOME_INFLUENZA_INFECTION	REACTOME_INFLUENZA_INFECTION	1.66556e-34	1.552e-32	4.87529e-32	RPL37/RPL38/RPS15/RPS27A/RPL11/UBA52/RPL8/RPL39/CLTA/RPL36A/RPS28/RPL32/RPLP2/RPS17/RPS27/RPL23A/RPL28/RPS15A/RPS19/RPS21	20	Esophagus_Gastroesophageal_Junction	rs34238187
GOBP_PROTEIN_LOCALIZATION_TO_ENDOPLASMIC_RETICULUM	GOBP_PROTEIN_LOCALIZATION_TO_ENDOPLASMIC_RETICULUM	9.0401e-33	7.72175e-31	2.15e-30	RPL37/RPL38/RPS15/RPS27A/RPL11/UBA52/RPL8/RPL39/RPL36A/RPS28/RPL32/RPLP2/RPS17/RPS27/RPL23A/RPL28/RPS15A/RPS19/RPS21	19	Esophagus_Gastroesophageal_Junction	rs34238187
REACTOME_CELLULAR_RESPONSE_TO_STARVATION	REACTOME_CELLULAR_RESPONSE_TO_STARVATION	2.58403e-32	2.03741e-30	5.78407e-30	RPL37/RPL38/RPS15/RPS27A/RPL11/UBA52/RPL8/RPL39/RPL36A/RPS28/RPL32/RPLP2/RPS17/RPS27/RPL23A/RPL28/RPS15A/RPS19/RPS21	19	Esophagus_Gastroesophageal_Junction	rs34238187
REACTOME_RRNA_PROCESSING	REACTOME_RRNA_PROCESSING	4.50269e-32	3.29661e-30	9.51885e-30	RPL37/RPL38/RPS15/RPS27A/RPL11/UBA52/FBL/RPL8/RPL39/RPL36A/RPS28/RPL32/RPLP2/RPS17/RPS27/RPL23A/RPL28/RPS15A/RPS19/RPS21	20	Esophagus_Gastroesophageal_Junction	rs34238187
GOBP_PROTEIN_TARGETING_TO_MEMBRANE	GOBP_PROTEIN_TARGETING_TO_MEMBRANE	6.09161e-32	4.1626e-30	1.22001e-29	RPL37/RPL38/RPS15/RPS27A/RPL11/NACA2/UBA52/RPL8/RPL39/RPL36A/RPS28/RPL32/RPLP2/RPS17/RPS27/RPL23A/RPL28/RPS15A/RPS19/RPS21	20	Esophagus_Gastroesophageal_Junction	rs34238187
GOMF_STRUCTURAL_CONSTITUENT_OF_RIBOSOME	GOMF_STRUCTURAL_CONSTITUENT_OF_RIBOSOME	8.88487e-32	5.69187e-30	1.60996e-29	RPL37/RPL38/RPS15/RPS27A/RPL11/UBA52/RPL8/RPL39/RPL36A/RPS28/RPL32/RPLP2/RPS17/RPS27/RPL23A/RPL28/RPS15A/RPS19/RPS21	19	Esophagus_Gastroesophageal_Junction	rs34238187
REACTOME_REGULATION_OF_EXPRESSION_OF_SLITS_AND_ROBOS	REACTOME_REGULATION_OF_EXPRESSION_OF_SLITS_AND_ROBOS	1.59994e-31	9.64671e-30	2.64704e-29	RPL37/RPL38/RPS15/RPS27A/RPL11/UBA52/RPL8/RPL39/RPL36A/RPS28/RPL32/RPLP2/RPS17/RPS27/RPL23A/RPL28/RPS15A/RPS19/RPS21	19	Esophagus_Gastroesophageal_Junction	rs34238187
GOBP_TRANSLATIONAL_INITIATION	GOBP_TRANSLATIONAL_INITIATION	1.57394e-30	8.96272e-29	2.21824e-28	RPL37/RPL38/RPS15/RPS27A/RPL11/UBA52/RPL8/RPL39/RPL36A/RPS28/RPL32/RPLP2/RPS17/RPS27/RPL23A/RPL28/RPS15A/RPS19/RPS21	19	Esophagus_Gastroesophageal_Junction	rs34238187
GOBP_VIRAL_GENE_EXPRESSION	GOBP_VIRAL_GENE_EXPRESSION	2.60908e-30	1.40753e-28	3.5458e-28	RPL37/RPL38/RPS15/RPS27A/RPL11/UBA52/RPL8/RPL39/RPL36A/RPS28/RPL32/RPLP2/RPS17/RPS27/RPL23A/RPL28/RPS15A/RPS19/RPS21	19	Esophagus_Gastroesophageal_Junction	rs34238187
GOBP_NUCLEAR_TRANSCRIBED_MRNA_CATABOLIC_PROCESS	GOBP_NUCLEAR_TRANSCRIBED_MRNA_CATABOLIC_PROCESS	6.89295e-30	3.53264e-28	8.74316e-28	RPL37/RPL38/RPS15/RPS27A/RPL11/UBA52/RPL8/RPL39/RPL36A/RPS28/RPL32/RPLP2/RPS17/RPS27/RPL23A/RPL28/RPS15A/RPS19/RPS21	19	Esophagus_Gastroesophageal_Junction	rs34238187
REACTOME_SIGNALING_BY_ROBO_RECEPTORS	REACTOME_SIGNALING_BY_ROBO_RECEPTORS	1.73545e-29	8.47063e-28	2.13027e-27	RPL37/RPL38/RPS15/RPS27A/RPL11/UBA52/RPL8/RPL39/RPL36A/RPS28/RPL32/RPLP2/RPS17/RPS27/RPL23A/RPL28/RPS15A/RPS19/RPS21	19	Esophagus_Gastroesophageal_Junction	rs34238187
REACTOME_TRANSLATION	REACTOME_TRANSLATION	8.14288e-29	3.79384e-27	9.38964e-27	RPL37/RPL38/RPS15/SEC11A/RPS27A/RPL11/UBA52/RPL8/RPL39/RPL36A/RPS28/RPL32/RPLP2/RPS17/RPS27/RPL23A/RPL28/RPS15A/RPS19/RPS21	20	Esophagus_Gastroesophageal_Junction	rs34238187
GOBP_ESTABLISHMENT_OF_PROTEIN_LOCALIZATION_TO_MEMBRANE	GOBP_ESTABLISHMENT_OF_PROTEIN_LOCALIZATION_TO_MEMBRANE	2.79179e-27	1.24417e-25	3.03528e-25	RPL37/RPL38/RPS15/RPS27A/RPL11/NACA2/UBA52/RPL8/RPL39/RPL36A/RPS28/RPL32/RPLP2/RPS17/RPS27/RPL23A/RPL28/RPS15A/RPS19/RPS21	20	Esophagus_Gastroesophageal_Junction	rs34238187
GOBP_RNA_CATABOLIC_PROCESS	GOBP_RNA_CATABOLIC_PROCESS	7.81632e-26	3.33822e-24	8.03869e-24	RPL37/CARHSP1/RPL38/RPS15/RPS27A/RPL11/UBA52/RPL8/RPL39/RPL36A/RPS28/RPL32/RPLP2/RPS17/RPS27/RPL23A/RPL28/RPS15A/RPS19/RPS21	20	Esophagus_Gastroesophageal_Junction	rs34238187
GOBP_PROTEIN_TARGETING	GOBP_PROTEIN_TARGETING	2.42478e-25	9.94158e-24	2.36588e-23	RPL37/RPL38/RPS15/RPS27A/RPL11/NACA2/UBA52/RPL8/RPL39/RPL36A/RPS28/RPL32/RPLP2/RPS17/RPS27/RPL23A/RPL28/RPS15A/RPS19/RPS21	20	Esophagus_Gastroesophageal_Junction	rs34238187
REACTOME_METABOLISM_OF_AMINO_ACIDS_AND_DERIVATIVES	REACTOME_METABOLISM_OF_AMINO_ACIDS_AND_DERIVATIVES	6.05094e-25	2.38547e-23	5.75635e-23	RPL37/RPL38/RPS15/RPS27A/RPL11/UBA52/RPL8/RPL39/RPL36A/RPS28/RPL32/RPLP2/RPS17/RPS27/RPL23A/RPL28/RPS15A/RPS19/RPS21	19	Esophagus_Gastroesophageal_Junction	rs34238187
REACTOME_ACTIVATION_OF_THE_MRNA_UPON_BINDING_OF_THE_CAP_BINDING_COMPLEX_AND_EIFS_AND_SUBSEQUENT_BINDING_TO_43S	REACTOME_ACTIVATION_OF_THE_MRNA_UPON_BINDING_OF_THE_CAP_BINDING_COMPLEX_AND_EIFS_AND_SUBSEQUENT_BINDING_TO_43S	2.21116e-14	8.37509e-13	1.03877e-12	RPS15/RPS27A/RPS28/RPS17/RPS27/RPS15A/RPS19/RPS21	8	Esophagus_Gastroesophageal_Junction	rs34238187
GOBP_CYTOPLASMIC_TRANSLATION	GOBP_CYTOPLASMIC_TRANSLATION	2.28783e-14	8.37509e-13	1.06168e-12	RPL38/RPL11/RPL8/RPL39/RPL36A/RPS28/RPL32/RPLP2/RPS21	9	Esophagus_Gastroesophageal_Junction	rs34238187
GOBP_RIBOSOME_ASSEMBLY	GOBP_RIBOSOME_ASSEMBLY	4.33314e-12	1.53154e-10	1.58546e-10	RPL38/RPS15/RPL11/RPS28/RPS27/RPL23A/RPS19	7	Esophagus_Gastroesophageal_Junction	rs34238187
GOBP_RIBOSOMAL_SMALL_SUBUNIT_BIOGENESIS	GOBP_RIBOSOMAL_SMALL_SUBUNIT_BIOGENESIS	1.36814e-11	4.67447e-10	4.6902e-10	RPL38/RPS15/RPS28/RPS17/RPS27/RPS19/RPS21	7	Esophagus_Gastroesophageal_Junction	rs34238187
GOBP_RIBOSOME_BIOGENESIS	GOBP_RIBOSOME_BIOGENESIS	1.68402e-11	5.56814e-10	5.67093e-10	RPL38/RPS15/RPL11/FBL/RPS28/RPS17/RPS27/RPL23A/RPS19/RPS21	10	Esophagus_Gastroesophageal_Junction	rs34238187
GOBP_RIBONUCLEOPROTEIN_COMPLEX_BIOGENESIS	GOBP_RIBONUCLEOPROTEIN_COMPLEX_BIOGENESIS	5.26179e-11	1.68542e-09	1.68256e-09	RPL38/RPS15/RPL11/FBL/RPS28/RPS17/RPS27/SNRPD2/RPL23A/RPS19/RPS21	11	Esophagus_Gastroesophageal_Junction	rs34238187
GOBP_RIBOSOMAL_SMALL_SUBUNIT_ASSEMBLY	GOBP_RIBOSOMAL_SMALL_SUBUNIT_ASSEMBLY	9.20597e-11	2.85943e-09	2.84806e-09	RPL38/RPS15/RPS28/RPS27/RPS19	5	Esophagus_Gastroesophageal_Junction	rs34238187
GOBP_RIBONUCLEOPROTEIN_COMPLEX_SUBUNIT_ORGANIZATION	GOBP_RIBONUCLEOPROTEIN_COMPLEX_SUBUNIT_ORGANIZATION	1.19458e-09	3.60129e-08	3.20118e-08	RPL38/RPS15/RPL11/RPS28/RPS27/SNRPD2/RPL23A/RPS19	8	Esophagus_Gastroesophageal_Junction	rs34238187
GOBP_RRNA_METABOLIC_PROCESS	GOBP_RRNA_METABOLIC_PROCESS	1.61806e-09	4.73859e-08	4.2463e-08	RPS15/RPL11/FBL/RPS28/RPS17/RPS27/RPS19/RPS21	8	Esophagus_Gastroesophageal_Junction	rs34238187
GOBP_NCRNA_PROCESSING	GOBP_NCRNA_PROCESSING	9.08207e-08	2.58587e-06	1.93071e-06	RPS15/RPL11/FBL/RPS28/RPS17/RPS27/RPS19/RPS21	8	Esophagus_Gastroesophageal_Junction	rs34238187
GOBP_NCRNA_METABOLIC_PROCESS	GOBP_NCRNA_METABOLIC_PROCESS	4.36647e-07	1.20963e-05	7.87468e-06	RPS15/RPL11/FBL/RPS28/RPS17/RPS27/RPS19/RPS21	8	Esophagus_Gastroesophageal_Junction	rs34238187
GOMF_RRNA_BINDING	GOMF_RRNA_BINDING	2.10071e-06	5.66639e-05	3.4605e-05	RPL37/RPL11/RPL8/RPL23A	4	Esophagus_Gastroesophageal_Junction	rs34238187
REACTOME_CALNEXIN_CALRETICULIN_CYCLE	REACTOME_CALNEXIN_CALRETICULIN_CYCLE	6.71339e-06	0.000176442	0.000100973	PRKCSH/RPS27A/UBA52	3	Esophagus_Gastroesophageal_Junction	rs34238187
GOBP_RIBOSOMAL_LARGE_SUBUNIT_ASSEMBLY	GOBP_RIBOSOMAL_LARGE_SUBUNIT_ASSEMBLY	8.44199e-06	0.00021105	0.000121223	RPL38/RPL11/RPL23A	3	Esophagus_Gastroesophageal_Junction	rs34238187
REACTOME_TRANSLATION_OF_SARS_COV_1_STRUCTURAL_PROTEINS	REACTOME_TRANSLATION_OF_SARS_COV_1_STRUCTURAL_PROTEINS	8.44199e-06	0.00021105	0.000121223	PRKCSH/RPS27A/UBA52	3	Esophagus_Gastroesophageal_Junction	rs34238187
REACTOME_N_GLYCAN_TRIMMING_IN_THE_ER_AND_CALNEXIN_CALRETICULIN_CYCLE	REACTOME_N_GLYCAN_TRIMMING_IN_THE_ER_AND_CALNEXIN_CALRETICULIN_CYCLE	1.67485e-05	0.000408743	0.000219012	PRKCSH/RPS27A/UBA52	3	Esophagus_Gastroesophageal_Junction	rs34238187
GOBP_LOW_DENSITY_LIPOPROTEIN_PARTICLE_CLEARANCE	GOBP_LOW_DENSITY_LIPOPROTEIN_PARTICLE_CLEARANCE	2.71158e-05	0.000646364	0.000345092	CNPY2/NPC2/CLTA	3	Esophagus_Gastroesophageal_Junction	rs34238187
REACTOME_TRANSLATION_OF_SARS_COV_2_STRUCTURAL_PROTEINS	REACTOME_TRANSLATION_OF_SARS_COV_2_STRUCTURAL_PROTEINS	3.3588e-05	0.000782447	0.000419052	PRKCSH/RPS27A/UBA52	3	Esophagus_Gastroesophageal_Junction	rs34238187
GOBP_MATURATION_OF_SSU_RRNA	GOBP_MATURATION_OF_SSU_RRNA	4.94106e-05	0.001101	0.000608481	RPS28/RPS19/RPS21	3	Esophagus_Gastroesophageal_Junction	rs34238187
REACTOME_SARS_COV_1_INFECTION	REACTOME_SARS_COV_1_INFECTION	4.94106e-05	0.001101	0.000608481	PRKCSH/RPS27A/UBA52	3	Esophagus_Gastroesophageal_Junction	rs34238187
REACTOME_NEUTROPHIL_DEGRANULATION	REACTOME_NEUTROPHIL_DEGRANULATION	5.7617e-05	0.00125654	0.000702717	CTSD/BRI3/FTL/NPC2/GMFG/GPR84	6	Esophagus_Gastroesophageal_Junction	rs34238187
REACTOME_IRON_UPTAKE_AND_TRANSPORT	REACTOME_IRON_UPTAKE_AND_TRANSPORT	7.71683e-05	0.00164786	0.000926327	FTL/RPS27A/UBA52	3	Esophagus_Gastroesophageal_Junction	rs34238187
GOMF_TFIID_CLASS_TRANSCRIPTION_FACTOR_COMPLEX_BINDING	GOMF_TFIID_CLASS_TRANSCRIPTION_FACTOR_COMPLEX_BINDING	8.69517e-05	0.00178251	0.00102756	FBL/EDF1	2	Esophagus_Gastroesophageal_Junction	rs34238187
REACTOME_IRAK2_MEDIATED_ACTIVATION_OF_TAK1_COMPLEX	REACTOME_IRAK2_MEDIATED_ACTIVATION_OF_TAK1_COMPLEX	8.69517e-05	0.00178251	0.00102756	RPS27A/UBA52	2	Esophagus_Gastroesophageal_Junction	rs34238187
REACTOME_ALPHA_PROTEIN_KINASE_1_SIGNALING_PATHWAY	REACTOME_ALPHA_PROTEIN_KINASE_1_SIGNALING_PATHWAY	0.000106178	0.00201542	0.00122807	RPS27A/UBA52	2	Esophagus_Gastroesophageal_Junction	rs34238187
REACTOME_PEXOPHAGY	REACTOME_PEXOPHAGY	0.000106178	0.00201542	0.00122807	RPS27A/UBA52	2	Esophagus_Gastroesophageal_Junction	rs34238187
REACTOME_REGULATION_OF_BACH1_ACTIVITY	REACTOME_REGULATION_OF_BACH1_ACTIVITY	0.000106178	0.00201542	0.00122807	RPS27A/UBA52	2	Esophagus_Gastroesophageal_Junction	rs34238187
REACTOME_TICAM1_TRAF6_DEPENDENT_INDUCTION_OF_TAK1_COMPLEX	REACTOME_TICAM1_TRAF6_DEPENDENT_INDUCTION_OF_TAK1_COMPLEX	0.000106178	0.00201542	0.00122807	RPS27A/UBA52	2	Esophagus_Gastroesophageal_Junction	rs34238187
GOBP_PLASMA_LIPOPROTEIN_PARTICLE_CLEARANCE	GOBP_PLASMA_LIPOPROTEIN_PARTICLE_CLEARANCE	0.00010848	0.00202168	0.0012509	CNPY2/NPC2/CLTA	3	Esophagus_Gastroesophageal_Junction	rs34238187
REACTOME_SARS_COV_2_INFECTION	REACTOME_SARS_COV_2_INFECTION	0.000118736	0.0021733	0.00136091	PRKCSH/RPS27A/UBA52	3	Esophagus_Gastroesophageal_Junction	rs34238187
REACTOME_JOSEPHIN_DOMAIN_DUBS	REACTOME_JOSEPHIN_DOMAIN_DUBS	0.000127299	0.00224967	0.0014374	RPS27A/UBA52	2	Esophagus_Gastroesophageal_Junction	rs34238187
REACTOME_TICAM1_DEPENDENT_ACTIVATION_OF_IRF3_IRF7	REACTOME_TICAM1_DEPENDENT_ACTIVATION_OF_IRF3_IRF7	0.000127299	0.00224967	0.0014374	RPS27A/UBA52	2	Esophagus_Gastroesophageal_Junction	rs34238187
GOBP_RIBOSOMAL_LARGE_SUBUNIT_BIOGENESIS	GOBP_RIBOSOMAL_LARGE_SUBUNIT_BIOGENESIS	0.000147087	0.00237024	0.00163657	RPL38/RPL11/RPL23A	3	Esophagus_Gastroesophageal_Junction	rs34238187
GOMF_PROTEIN_TAG	GOMF_PROTEIN_TAG	0.000150308	0.00237024	0.00163886	RPS27A/UBA52	2	Esophagus_Gastroesophageal_Junction	rs34238187
REACTOME_DOWNREGULATION_OF_ERBB2_ERBB3_SIGNALING	REACTOME_DOWNREGULATION_OF_ERBB2_ERBB3_SIGNALING	0.000150308	0.00237024	0.00163886	RPS27A/UBA52	2	Esophagus_Gastroesophageal_Junction	rs34238187
REACTOME_NF_KB_IS_ACTIVATED_AND_SIGNALS_SURVIVAL	REACTOME_NF_KB_IS_ACTIVATED_AND_SIGNALS_SURVIVAL	0.000150308	0.00237024	0.00163886	RPS27A/UBA52	2	Esophagus_Gastroesophageal_Junction	rs34238187
REACTOME_P75NTR_RECRUITS_SIGNALLING_COMPLEXES	REACTOME_P75NTR_RECRUITS_SIGNALLING_COMPLEXES	0.000150308	0.00237024	0.00163886	RPS27A/UBA52	2	Esophagus_Gastroesophageal_Junction	rs34238187
REACTOME_SUPPRESSION_OF_PHAGOSOMAL_MATURATION	REACTOME_SUPPRESSION_OF_PHAGOSOMAL_MATURATION	0.000150308	0.00237024	0.00163886	RPS27A/UBA52	2	Esophagus_Gastroesophageal_Junction	rs34238187
REACTOME_TRAF6_MEDIATED_IRF7_ACTIVATION_IN_TLR7_8_OR_9_SIGNALING	REACTOME_TRAF6_MEDIATED_IRF7_ACTIVATION_IN_TLR7_8_OR_9_SIGNALING	0.000150308	0.00237024	0.00163886	RPS27A/UBA52	2	Esophagus_Gastroesophageal_Junction	rs34238187
REACTOME_IRAK1_RECRUITS_IKK_COMPLEX	REACTOME_IRAK1_RECRUITS_IKK_COMPLEX	0.000175201	0.00272092	0.00176101	RPS27A/UBA52	2	Esophagus_Gastroesophageal_Junction	rs34238187
REACTOME_INLB_MEDIATED_ENTRY_OF_LISTERIA_MONOCYTOGENES_INTO_HOST_CELL	REACTOME_INLB_MEDIATED_ENTRY_OF_LISTERIA_MONOCYTOGENES_INTO_HOST_CELL	0.000201972	0.00295744	0.00189299	RPS27A/UBA52	2	Esophagus_Gastroesophageal_Junction	rs34238187
REACTOME_NEGATIVE_REGULATION_OF_FLT3	REACTOME_NEGATIVE_REGULATION_OF_FLT3	0.000201972	0.00295744	0.00189299	RPS27A/UBA52	2	Esophagus_Gastroesophageal_Junction	rs34238187
REACTOME_REGULATION_OF_INNATE_IMMUNE_RESPONSES_TO_CYTOSOLIC_DNA	REACTOME_REGULATION_OF_INNATE_IMMUNE_RESPONSES_TO_CYTOSOLIC_DNA	0.000201972	0.00295744	0.00189299	RPS27A/UBA52	2	Esophagus_Gastroesophageal_Junction	rs34238187
REACTOME_SIGNALING_BY_NOTCH1_HD_DOMAIN_MUTANTS_IN_CANCER	REACTOME_SIGNALING_BY_NOTCH1_HD_DOMAIN_MUTANTS_IN_CANCER	0.000201972	0.00295744	0.00189299	RPS27A/UBA52	2	Esophagus_Gastroesophageal_Junction	rs34238187
REACTOME_ASSEMBLY_OF_THE_HIV_VIRION	REACTOME_ASSEMBLY_OF_THE_HIV_VIRION	0.000230616	0.00299217	0.00210445	RPS27A/UBA52	2	Esophagus_Gastroesophageal_Junction	rs34238187
REACTOME_GLYCOGEN_STORAGE_DISEASES	REACTOME_GLYCOGEN_STORAGE_DISEASES	0.000230616	0.00299217	0.00210445	RPS27A/UBA52	2	Esophagus_Gastroesophageal_Junction	rs34238187
REACTOME_GLYCOGEN_SYNTHESIS	REACTOME_GLYCOGEN_SYNTHESIS	0.000230616	0.00299217	0.00210445	RPS27A/UBA52	2	Esophagus_Gastroesophageal_Junction	rs34238187
REACTOME_MAP3K8_TPL2_DEPENDENT_MAPK1_3_ACTIVATION	REACTOME_MAP3K8_TPL2_DEPENDENT_MAPK1_3_ACTIVATION	0.000230616	0.00299217	0.00210445	RPS27A/UBA52	2	Esophagus_Gastroesophageal_Junction	rs34238187
REACTOME_NRIF_SIGNALS_CELL_DEATH_FROM_THE_NUCLEUS	REACTOME_NRIF_SIGNALS_CELL_DEATH_FROM_THE_NUCLEUS	0.000230616	0.00299217	0.00210445	RPS27A/UBA52	2	Esophagus_Gastroesophageal_Junction	rs34238187
REACTOME_P75NTR_SIGNALS_VIA_NF_KB	REACTOME_P75NTR_SIGNALS_VIA_NF_KB	0.000230616	0.00299217	0.00210445	RPS27A/UBA52	2	Esophagus_Gastroesophageal_Junction	rs34238187
REACTOME_SPRY_REGULATION_OF_FGF_SIGNALING	REACTOME_SPRY_REGULATION_OF_FGF_SIGNALING	0.000230616	0.00299217	0.00210445	RPS27A/UBA52	2	Esophagus_Gastroesophageal_Junction	rs34238187
REACTOME_TGF_BETA_RECEPTOR_SIGNALING_IN_EMT_EPITHELIAL_TO_MESENCHYMAL_TRANSITION	REACTOME_TGF_BETA_RECEPTOR_SIGNALING_IN_EMT_EPITHELIAL_TO_MESENCHYMAL_TRANSITION	0.000230616	0.00299217	0.00210445	RPS27A/UBA52	2	Esophagus_Gastroesophageal_Junction	rs34238187
REACTOME_TRAF6_MEDIATED_INDUCTION_OF_TAK1_COMPLEX_WITHIN_TLR4_COMPLEX	REACTOME_TRAF6_MEDIATED_INDUCTION_OF_TAK1_COMPLEX_WITHIN_TLR4_COMPLEX	0.000230616	0.00299217	0.00210445	RPS27A/UBA52	2	Esophagus_Gastroesophageal_Junction	rs34238187
GOBP_OSSIFICATION	GOBP_OSSIFICATION	0.0002484	0.00318263	0.00225054	RPL38/RPS15/SPP1/FBL/IFITM1	5	Esophagus_Gastroesophageal_Junction	rs34238187
REACTOME_ACTIVATION_OF_IRF3_IRF7_MEDIATED_BY_TBK1_IKK_EPSILON	REACTOME_ACTIVATION_OF_IRF3_IRF7_MEDIATED_BY_TBK1_IKK_EPSILON	0.000261129	0.00326411	0.00235465	RPS27A/UBA52	2	Esophagus_Gastroesophageal_Junction	rs34238187
REACTOME_TRANSLESION_SYNTHESIS_BY_POLK	REACTOME_TRANSLESION_SYNTHESIS_BY_POLK	0.000261129	0.00326411	0.00235465	RPS27A/UBA52	2	Esophagus_Gastroesophageal_Junction	rs34238187
GOBP_OSTEOBLAST_DIFFERENTIATION	GOBP_OSTEOBLAST_DIFFERENTIATION	0.000276167	0.00341049	0.00247851	RPS15/SPP1/FBL/IFITM1	4	Esophagus_Gastroesophageal_Junction	rs34238187
REACTOME_PCP_CE_PATHWAY	REACTOME_PCP_CE_PATHWAY	0.000303603	0.00370468	0.00271195	RPS27A/UBA52/CLTA	3	Esophagus_Gastroesophageal_Junction	rs34238187
GOMF_RNA_POLYMERASE_II_GENERAL_TRANSCRIPTION_INITIATION_FACTOR_BINDING	GOMF_RNA_POLYMERASE_II_GENERAL_TRANSCRIPTION_INITIATION_FACTOR_BINDING	0.000327738	0.00373257	0.00288687	FBL/EDF1	2	Esophagus_Gastroesophageal_Junction	rs34238187
REACTOME_CONSTITUTIVE_SIGNALING_BY_LIGAND_RESPONSIVE_EGFR_CANCER_VARIANTS	REACTOME_CONSTITUTIVE_SIGNALING_BY_LIGAND_RESPONSIVE_EGFR_CANCER_VARIANTS	0.000327738	0.00373257	0.00288687	RPS27A/UBA52	2	Esophagus_Gastroesophageal_Junction	rs34238187
REACTOME_LDL_CLEARANCE	REACTOME_LDL_CLEARANCE	0.000327738	0.00373257	0.00288687	NPC2/CLTA	2	Esophagus_Gastroesophageal_Junction	rs34238187
REACTOME_REGULATION_OF_TP53_ACTIVITY_THROUGH_METHYLATION	REACTOME_REGULATION_OF_TP53_ACTIVITY_THROUGH_METHYLATION	0.000327738	0.00373257	0.00288687	RPS27A/UBA52	2	Esophagus_Gastroesophageal_Junction	rs34238187
REACTOME_TICAM1_RIP1_MEDIATED_IKK_COMPLEX_RECRUITMENT	REACTOME_TICAM1_RIP1_MEDIATED_IKK_COMPLEX_RECRUITMENT	0.000327738	0.00373257	0.00288687	RPS27A/UBA52	2	Esophagus_Gastroesophageal_Junction	rs34238187
REACTOME_TRANSLESION_SYNTHESIS_BY_POLH	REACTOME_TRANSLESION_SYNTHESIS_BY_POLH	0.000327738	0.00373257	0.00288687	RPS27A/UBA52	2	Esophagus_Gastroesophageal_Junction	rs34238187
REACTOME_TRANSCRIPTIONAL_REGULATION_BY_RUNX3	REACTOME_TRANSCRIPTIONAL_REGULATION_BY_RUNX3	0.000344055	0.00387535	0.0030236	SPP1/RPS27A/UBA52	3	Esophagus_Gastroesophageal_Junction	rs34238187
REACTOME_LISTERIA_MONOCYTOGENES_ENTRY_INTO_HOST_CELLS	REACTOME_LISTERIA_MONOCYTOGENES_ENTRY_INTO_HOST_CELLS	0.000363824	0.00405348	0.00317534	RPS27A/UBA52	2	Esophagus_Gastroesophageal_Junction	rs34238187
GOBP_REGULATION_OF_PLASMA_LIPOPROTEIN_PARTICLE_LEVELS	GOBP_REGULATION_OF_PLASMA_LIPOPROTEIN_PARTICLE_LEVELS	0.000399301	0.00424538	0.0034355	CNPY2/NPC2/CLTA	3	Esophagus_Gastroesophageal_Junction	rs34238187
GOBP_ERROR_PRONE_TRANSLESION_SYNTHESIS	GOBP_ERROR_PRONE_TRANSLESION_SYNTHESIS	0.000401758	0.00424538	0.0034355	RPS27A/UBA52	2	Esophagus_Gastroesophageal_Junction	rs34238187
REACTOME_ER_QUALITY_CONTROL_COMPARTMENT_ERQC	REACTOME_ER_QUALITY_CONTROL_COMPARTMENT_ERQC	0.000401758	0.00424538	0.0034355	RPS27A/UBA52	2	Esophagus_Gastroesophageal_Junction	rs34238187
REACTOME_NEGATIVE_REGULATION_OF_MET_ACTIVITY	REACTOME_NEGATIVE_REGULATION_OF_MET_ACTIVITY	0.000401758	0.00424538	0.0034355	RPS27A/UBA52	2	Esophagus_Gastroesophageal_Junction	rs34238187
REACTOME_REGULATION_OF_FZD_BY_UBIQUITINATION	REACTOME_REGULATION_OF_FZD_BY_UBIQUITINATION	0.000401758	0.00424538	0.0034355	RPS27A/UBA52	2	Esophagus_Gastroesophageal_Junction	rs34238187
GOBP_ERROR_FREE_TRANSLESION_SYNTHESIS	GOBP_ERROR_FREE_TRANSLESION_SYNTHESIS	0.000441535	0.00435167	0.00370895	RPS27A/UBA52	2	Esophagus_Gastroesophageal_Junction	rs34238187
GOBP_NUCLEOTIDE_EXCISION_REPAIR_DNA_DUPLEX_UNWINDING	GOBP_NUCLEOTIDE_EXCISION_REPAIR_DNA_DUPLEX_UNWINDING	0.000441535	0.00435167	0.00370895	RPS27A/UBA52	2	Esophagus_Gastroesophageal_Junction	rs34238187
REACTOME_CHAPERONE_MEDIATED_AUTOPHAGY	REACTOME_CHAPERONE_MEDIATED_AUTOPHAGY	0.000441535	0.00435167	0.00370895	RPS27A/UBA52	2	Esophagus_Gastroesophageal_Junction	rs34238187
REACTOME_JNK_C_JUN_KINASES_PHOSPHORYLATION_AND_ACTIVATION_MEDIATED_BY_ACTIVATED_HUMAN_TAK1	REACTOME_JNK_C_JUN_KINASES_PHOSPHORYLATION_AND_ACTIVATION_MEDIATED_BY_ACTIVATED_HUMAN_TAK1	0.000441535	0.00435167	0.00370895	RPS27A/UBA52	2	Esophagus_Gastroesophageal_Junction	rs34238187
REACTOME_NOTCH2_ACTIVATION_AND_TRANSMISSION_OF_SIGNAL_TO_THE_NUCLEUS	REACTOME_NOTCH2_ACTIVATION_AND_TRANSMISSION_OF_SIGNAL_TO_THE_NUCLEUS	0.000441535	0.00435167	0.00370895	RPS27A/UBA52	2	Esophagus_Gastroesophageal_Junction	rs34238187
REACTOME_PINK1_PRKN_MEDIATED_MITOPHAGY	REACTOME_PINK1_PRKN_MEDIATED_MITOPHAGY	0.000441535	0.00435167	0.00370895	RPS27A/UBA52	2	Esophagus_Gastroesophageal_Junction	rs34238187
REACTOME_REGULATION_OF_SIGNALING_BY_CBL	REACTOME_REGULATION_OF_SIGNALING_BY_CBL	0.000441535	0.00435167	0.00370895	RPS27A/UBA52	2	Esophagus_Gastroesophageal_Junction	rs34238187
REACTOME_CARGO_RECOGNITION_FOR_CLATHRIN_MEDIATED_ENDOCYTOSIS	REACTOME_CARGO_RECOGNITION_FOR_CLATHRIN_MEDIATED_ENDOCYTOSIS	0.000447379	0.00436727	0.00374153	RPS27A/UBA52/CLTA	3	Esophagus_Gastroesophageal_Junction	rs34238187
GOBP_NUCLEOTIDE_EXCISION_REPAIR_DNA_DAMAGE_RECOGNITION	GOBP_NUCLEOTIDE_EXCISION_REPAIR_DNA_DAMAGE_RECOGNITION	0.000483149	0.00442168	0.0039623	RPS27A/UBA52	2	Esophagus_Gastroesophageal_Junction	rs34238187
GOBP_NUCLEOTIDE_EXCISION_REPAIR_DNA_GAP_FILLING	GOBP_NUCLEOTIDE_EXCISION_REPAIR_DNA_GAP_FILLING	0.000483149	0.00442168	0.0039623	RPS27A/UBA52	2	Esophagus_Gastroesophageal_Junction	rs34238187
GOMF_FIBROBLAST_GROWTH_FACTOR_BINDING	GOMF_FIBROBLAST_GROWTH_FACTOR_BINDING	0.000483149	0.00442168	0.0039623	S100A13/RPS19	2	Esophagus_Gastroesophageal_Junction	rs34238187
REACTOME_ACTIVATED_TAK1_MEDIATES_P38_MAPK_ACTIVATION	REACTOME_ACTIVATED_TAK1_MEDIATES_P38_MAPK_ACTIVATION	0.000483149	0.00442168	0.0039623	RPS27A/UBA52	2	Esophagus_Gastroesophageal_Junction	rs34238187
REACTOME_DOWNREGULATION_OF_SMAD2_3_SMAD4_TRANSCRIPTIONAL_ACTIVITY	REACTOME_DOWNREGULATION_OF_SMAD2_3_SMAD4_TRANSCRIPTIONAL_ACTIVITY	0.000483149	0.00442168	0.0039623	RPS27A/UBA52	2	Esophagus_Gastroesophageal_Junction	rs34238187
REACTOME_IKK_COMPLEX_RECRUITMENT_MEDIATED_BY_RIP1	REACTOME_IKK_COMPLEX_RECRUITMENT_MEDIATED_BY_RIP1	0.000483149	0.00442168	0.0039623	RPS27A/UBA52	2	Esophagus_Gastroesophageal_Junction	rs34238187
REACTOME_RESPONSE_OF_MTB_TO_PHAGOCYTOSIS	REACTOME_RESPONSE_OF_MTB_TO_PHAGOCYTOSIS	0.000483149	0.00442168	0.0039623	RPS27A/UBA52	2	Esophagus_Gastroesophageal_Junction	rs34238187
REACTOME_APC_C_CDC20_MEDIATED_DEGRADATION_OF_CYCLIN_B	REACTOME_APC_C_CDC20_MEDIATED_DEGRADATION_OF_CYCLIN_B	0.000526596	0.00473474	0.00429087	RPS27A/UBA52	2	Esophagus_Gastroesophageal_Junction	rs34238187
REACTOME_RAS_PROCESSING	REACTOME_RAS_PROCESSING	0.000526596	0.00473474	0.00429087	RPS27A/UBA52	2	Esophagus_Gastroesophageal_Junction	rs34238187
REACTOME_GAP_FILLING_DNA_REPAIR_SYNTHESIS_AND_LIGATION_IN_GG_NER	REACTOME_GAP_FILLING_DNA_REPAIR_SYNTHESIS_AND_LIGATION_IN_GG_NER	0.00057187	0.00496751	0.00455254	RPS27A/UBA52	2	Esophagus_Gastroesophageal_Junction	rs34238187
REACTOME_INACTIVATION_OF_CSF3_G_CSF_SIGNALING	REACTOME_INACTIVATION_OF_CSF3_G_CSF_SIGNALING	0.00057187	0.00496751	0.00455254	RPS27A/UBA52	2	Esophagus_Gastroesophageal_Junction	rs34238187
REACTOME_NOTCH3_ACTIVATION_AND_TRANSMISSION_OF_SIGNAL_TO_THE_NUCLEUS	REACTOME_NOTCH3_ACTIVATION_AND_TRANSMISSION_OF_SIGNAL_TO_THE_NUCLEUS	0.00057187	0.00496751	0.00455254	RPS27A/UBA52	2	Esophagus_Gastroesophageal_Junction	rs34238187
REACTOME_SIGNALING_BY_EGFR_IN_CANCER	REACTOME_SIGNALING_BY_EGFR_IN_CANCER	0.00057187	0.00496751	0.00455254	RPS27A/UBA52	2	Esophagus_Gastroesophageal_Junction	rs34238187
GOBP_GLOBAL_GENOME_NUCLEOTIDE_EXCISION_REPAIR	GOBP_GLOBAL_GENOME_NUCLEOTIDE_EXCISION_REPAIR	0.000618966	0.00524331	0.00486638	RPS27A/UBA52	2	Esophagus_Gastroesophageal_Junction	rs34238187
REACTOME_APC_CDC20_MEDIATED_DEGRADATION_OF_NEK2A	REACTOME_APC_CDC20_MEDIATED_DEGRADATION_OF_NEK2A	0.000618966	0.00524331	0.00486638	RPS27A/UBA52	2	Esophagus_Gastroesophageal_Junction	rs34238187
REACTOME_DOWNREGULATION_OF_TGF_BETA_RECEPTOR_SIGNALING	REACTOME_DOWNREGULATION_OF_TGF_BETA_RECEPTOR_SIGNALING	0.000618966	0.00524331	0.00486638	RPS27A/UBA52	2	Esophagus_Gastroesophageal_Junction	rs34238187
REACTOME_GLYCOGEN_METABOLISM	REACTOME_GLYCOGEN_METABOLISM	0.00066788	0.00554667	0.0052186	RPS27A/UBA52	2	Esophagus_Gastroesophageal_Junction	rs34238187
REACTOME_INFECTION_WITH_MYCOBACTERIUM_TUBERCULOSIS	REACTOME_INFECTION_WITH_MYCOBACTERIUM_TUBERCULOSIS	0.00066788	0.00554667	0.0052186	RPS27A/UBA52	2	Esophagus_Gastroesophageal_Junction	rs34238187
GOBP_ERYTHROCYTE_HOMEOSTASIS	GOBP_ERYTHROCYTE_HOMEOSTASIS	0.000676423	0.00554667	0.00526374	G6PD/RPS17/RPS19	3	Esophagus_Gastroesophageal_Junction	rs34238187
KEGG_LYSOSOME	KEGG_LYSOSOME	0.000676423	0.00554667	0.00526374	CTSD/NPC2/CLTA	3	Esophagus_Gastroesophageal_Junction	rs34238187
REACTOME_BUDDING_AND_MATURATION_OF_HIV_VIRION	REACTOME_BUDDING_AND_MATURATION_OF_HIV_VIRION	0.000718606	0.00579977	0.00552421	RPS27A/UBA52	2	Esophagus_Gastroesophageal_Junction	rs34238187
REACTOME_FLT3_SIGNALING_IN_DISEASE	REACTOME_FLT3_SIGNALING_IN_DISEASE	0.000718606	0.00579977	0.00552421	RPS27A/UBA52	2	Esophagus_Gastroesophageal_Junction	rs34238187
GOBP_NUCLEOTIDE_EXCISION_REPAIR_PREINCISION_COMPLEX_ASSEMBLY	GOBP_NUCLEOTIDE_EXCISION_REPAIR_PREINCISION_COMPLEX_ASSEMBLY	0.000771139	0.00598801	0.00581067	RPS27A/UBA52	2	Esophagus_Gastroesophageal_Junction	rs34238187
REACTOME_DOWNREGULATION_OF_ERBB2_SIGNALING	REACTOME_DOWNREGULATION_OF_ERBB2_SIGNALING	0.000771139	0.00598801	0.00581067	RPS27A/UBA52	2	Esophagus_Gastroesophageal_Junction	rs34238187
REACTOME_MITOPHAGY	REACTOME_MITOPHAGY	0.000771139	0.00598801	0.00581067	RPS27A/UBA52	2	Esophagus_Gastroesophageal_Junction	rs34238187
REACTOME_NEGATIVE_REGULATION_OF_FGFR3_SIGNALING	REACTOME_NEGATIVE_REGULATION_OF_FGFR3_SIGNALING	0.000771139	0.00598801	0.00581067	RPS27A/UBA52	2	Esophagus_Gastroesophageal_Junction	rs34238187
REACTOME_RIPK1_MEDIATED_REGULATED_NECROSIS	REACTOME_RIPK1_MEDIATED_REGULATED_NECROSIS	0.000771139	0.00598801	0.00581067	RPS27A/UBA52	2	Esophagus_Gastroesophageal_Junction	rs34238187
REACTOME_RECOGNITION_OF_DNA_DAMAGE_BY_PCNA_CONTAINING_REPLICATION_COMPLEX	REACTOME_RECOGNITION_OF_DNA_DAMAGE_BY_PCNA_CONTAINING_REPLICATION_COMPLEX	0.000825474	0.00622141	0.00614706	RPS27A/UBA52	2	Esophagus_Gastroesophageal_Junction	rs34238187
REACTOME_SIGNALING_BY_CSF3_G_CSF	REACTOME_SIGNALING_BY_CSF3_G_CSF	0.000825474	0.00622141	0.00614706	RPS27A/UBA52	2	Esophagus_Gastroesophageal_Junction	rs34238187
REACTOME_SYNTHESIS_OF_ACTIVE_UBIQUITIN_ROLES_OF_E1_AND_E2_ENZYMES	REACTOME_SYNTHESIS_OF_ACTIVE_UBIQUITIN_ROLES_OF_E1_AND_E2_ENZYMES	0.000825474	0.00622141	0.00614706	RPS27A/UBA52	2	Esophagus_Gastroesophageal_Junction	rs34238187
REACTOME_TNFR1_INDUCED_NFKAPPAB_SIGNALING_PATHWAY	REACTOME_TNFR1_INDUCED_NFKAPPAB_SIGNALING_PATHWAY	0.000825474	0.00622141	0.00614706	RPS27A/UBA52	2	Esophagus_Gastroesophageal_Junction	rs34238187
GOBP_NUCLEIC_ACID_PHOSPHODIESTER_BOND_HYDROLYSIS	GOBP_NUCLEIC_ACID_PHOSPHODIESTER_BOND_HYDROLYSIS	0.000855266	0.00639888	0.00634408	RNASEK/RPS27A/UBA52/RPS21	4	Esophagus_Gastroesophageal_Junction	rs34238187
REACTOME_ACTIVATED_NOTCH1_TRANSMITS_SIGNAL_TO_THE_NUCLEUS	REACTOME_ACTIVATED_NOTCH1_TRANSMITS_SIGNAL_TO_THE_NUCLEUS	0.000881607	0.00640885	0.00647635	RPS27A/UBA52	2	Esophagus_Gastroesophageal_Junction	rs34238187
REACTOME_EGFR_DOWNREGULATION	REACTOME_EGFR_DOWNREGULATION	0.000881607	0.00640885	0.00647635	RPS27A/UBA52	2	Esophagus_Gastroesophageal_Junction	rs34238187
REACTOME_ENDOSOMAL_SORTING_COMPLEX_REQUIRED_FOR_TRANSPORT_ESCRT	REACTOME_ENDOSOMAL_SORTING_COMPLEX_REQUIRED_FOR_TRANSPORT_ESCRT	0.000881607	0.00640885	0.00647635	RPS27A/UBA52	2	Esophagus_Gastroesophageal_Junction	rs34238187
REACTOME_NEGATIVE_REGULATION_OF_FGFR4_SIGNALING	REACTOME_NEGATIVE_REGULATION_OF_FGFR4_SIGNALING	0.000881607	0.00640885	0.00647635	RPS27A/UBA52	2	Esophagus_Gastroesophageal_Junction	rs34238187
REACTOME_SMAD2_SMAD3_SMAD4_HETEROTRIMER_REGULATES_TRANSCRIPTION	REACTOME_SMAD2_SMAD3_SMAD4_HETEROTRIMER_REGULATES_TRANSCRIPTION	0.000939532	0.00664152	0.00677115	RPS27A/UBA52	2	Esophagus_Gastroesophageal_Junction	rs34238187
REACTOME_TAK1_ACTIVATES_NFKB_BY_PHOSPHORYLATION_AND_ACTIVATION_OF_IKKS_COMPLEX	REACTOME_TAK1_ACTIVATES_NFKB_BY_PHOSPHORYLATION_AND_ACTIVATION_OF_IKKS_COMPLEX	0.000939532	0.00664152	0.00677115	RPS27A/UBA52	2	Esophagus_Gastroesophageal_Junction	rs34238187
REACTOME_TERMINATION_OF_TRANSLESION_DNA_SYNTHESIS	REACTOME_TERMINATION_OF_TRANSLESION_DNA_SYNTHESIS	0.000939532	0.00664152	0.00677115	RPS27A/UBA52	2	Esophagus_Gastroesophageal_Junction	rs34238187
REACTOME_TGF_BETA_RECEPTOR_SIGNALING_ACTIVATES_SMADS	REACTOME_TGF_BETA_RECEPTOR_SIGNALING_ACTIVATES_SMADS	0.000939532	0.00664152	0.00677115	RPS27A/UBA52	2	Esophagus_Gastroesophageal_Junction	rs34238187
REACTOME_NEGATIVE_REGULATION_OF_FGFR1_SIGNALING	REACTOME_NEGATIVE_REGULATION_OF_FGFR1_SIGNALING	0.000999245	0.00692044	0.00709401	RPS27A/UBA52	2	Esophagus_Gastroesophageal_Junction	rs34238187
REACTOME_PLASMA_LIPOPROTEIN_CLEARANCE	REACTOME_PLASMA_LIPOPROTEIN_CLEARANCE	0.000999245	0.00692044	0.00709401	NPC2/CLTA	2	Esophagus_Gastroesophageal_Junction	rs34238187
REACTOME_SIGNALING_BY_NOTCH2	REACTOME_SIGNALING_BY_NOTCH2	0.000999245	0.00692044	0.00709401	RPS27A/UBA52	2	Esophagus_Gastroesophageal_Junction	rs34238187
GOBP_MYD88_INDEPENDENT_TOLL_LIKE_RECEPTOR_SIGNALING_PATHWAY	GOBP_MYD88_INDEPENDENT_TOLL_LIKE_RECEPTOR_SIGNALING_PATHWAY	0.00106074	0.00710626	0.00744722	RPS27A/UBA52	2	Esophagus_Gastroesophageal_Junction	rs34238187
REACTOME_DISEASES_OF_CARBOHYDRATE_METABOLISM	REACTOME_DISEASES_OF_CARBOHYDRATE_METABOLISM	0.00106074	0.00710626	0.00744722	RPS27A/UBA52	2	Esophagus_Gastroesophageal_Junction	rs34238187
REACTOME_LATE_ENDOSOMAL_MICROAUTOPHAGY	REACTOME_LATE_ENDOSOMAL_MICROAUTOPHAGY	0.00106074	0.00710626	0.00744722	RPS27A/UBA52	2	Esophagus_Gastroesophageal_Junction	rs34238187
REACTOME_NEGATIVE_REGULATION_OF_FGFR2_SIGNALING	REACTOME_NEGATIVE_REGULATION_OF_FGFR2_SIGNALING	0.00106074	0.00710626	0.00744722	RPS27A/UBA52	2	Esophagus_Gastroesophageal_Junction	rs34238187
REACTOME_NEGATIVE_REGULATORS_OF_DDX58_IFIH1_SIGNALING	REACTOME_NEGATIVE_REGULATORS_OF_DDX58_IFIH1_SIGNALING	0.00106074	0.00710626	0.00744722	RPS27A/UBA52	2	Esophagus_Gastroesophageal_Junction	rs34238187
GOBP_MYD88_DEPENDENT_TOLL_LIKE_RECEPTOR_SIGNALING_PATHWAY	GOBP_MYD88_DEPENDENT_TOLL_LIKE_RECEPTOR_SIGNALING_PATHWAY	0.00112401	0.00738533	0.00779082	RPS27A/UBA52	2	Esophagus_Gastroesophageal_Junction	rs34238187
REACTOME_ONCOGENE_INDUCED_SENESCENCE	REACTOME_ONCOGENE_INDUCED_SENESCENCE	0.00112401	0.00738533	0.00779082	RPS27A/UBA52	2	Esophagus_Gastroesophageal_Junction	rs34238187
REACTOME_REGULATION_OF_TNFR1_SIGNALING	REACTOME_REGULATION_OF_TNFR1_SIGNALING	0.00112401	0.00738533	0.00779082	RPS27A/UBA52	2	Esophagus_Gastroesophageal_Junction	rs34238187
GOBP_MYELOID_CELL_HOMEOSTASIS	GOBP_MYELOID_CELL_HOMEOSTASIS	0.00114134	0.00740426	0.0078537	G6PD/RPS17/RPS19	3	Esophagus_Gastroesophageal_Junction	rs34238187
REACTOME_CLATHRIN_MEDIATED_ENDOCYTOSIS	REACTOME_CLATHRIN_MEDIATED_ENDOCYTOSIS	0.00114134	0.00740426	0.0078537	RPS27A/UBA52/CLTA	3	Esophagus_Gastroesophageal_Junction	rs34238187
REACTOME_BETA_CATENIN_INDEPENDENT_WNT_SIGNALING	REACTOME_BETA_CATENIN_INDEPENDENT_WNT_SIGNALING	0.00116413	0.00745769	0.00795298	RPS27A/UBA52/CLTA	3	Esophagus_Gastroesophageal_Junction	rs34238187
REACTOME_SARS_COV_INFECTIONS	REACTOME_SARS_COV_INFECTIONS	0.00116413	0.00745769	0.00795298	PRKCSH/RPS27A/UBA52	3	Esophagus_Gastroesophageal_Junction	rs34238187
REACTOME_NOD1_2_SIGNALING_PATHWAY	REACTOME_NOD1_2_SIGNALING_PATHWAY	0.00118906	0.00757008	0.00810873	RPS27A/UBA52	2	Esophagus_Gastroesophageal_Junction	rs34238187
GOBP_MATURATION_OF_SSU_RRNA_FROM_TRICISTRONIC_RRNA_TRANSCRIPT_SSU_RRNA_5_8S_RRNA_LSU_RRNA	GOBP_MATURATION_OF_SSU_RRNA_FROM_TRICISTRONIC_RRNA_TRANSCRIPT_SSU_RRNA_5_8S_RRNA_LSU_RRNA	0.00125587	0.00784918	0.00848829	RPS19/RPS21	2	Esophagus_Gastroesophageal_Junction	rs34238187
REACTOME_METALLOPROTEASE_DUBS	REACTOME_METALLOPROTEASE_DUBS	0.00125587	0.00784918	0.00848829	RPS27A/UBA52	2	Esophagus_Gastroesophageal_Junction	rs34238187
REACTOME_REGULATION_OF_TP53_EXPRESSION_AND_DEGRADATION	REACTOME_REGULATION_OF_TP53_EXPRESSION_AND_DEGRADATION	0.00125587	0.00784918	0.00848829	RPS27A/UBA52	2	Esophagus_Gastroesophageal_Junction	rs34238187
REACTOME_DNA_DAMAGE_RECOGNITION_IN_GG_NER	REACTOME_DNA_DAMAGE_RECOGNITION_IN_GG_NER	0.00132444	0.00812907	0.00887298	RPS27A/UBA52	2	Esophagus_Gastroesophageal_Junction	rs34238187
REACTOME_FLT3_SIGNALING	REACTOME_FLT3_SIGNALING	0.00132444	0.00812907	0.00887298	RPS27A/UBA52	2	Esophagus_Gastroesophageal_Junction	rs34238187
REACTOME_OVARIAN_TUMOR_DOMAIN_PROTEASES	REACTOME_OVARIAN_TUMOR_DOMAIN_PROTEASES	0.00132444	0.00812907	0.00887298	RPS27A/UBA52	2	Esophagus_Gastroesophageal_Junction	rs34238187
GOBP_DNA_DAMAGE_RESPONSE_DETECTION_OF_DNA_DAMAGE	GOBP_DNA_DAMAGE_RESPONSE_DETECTION_OF_DNA_DAMAGE	0.00139478	0.0083605	0.00923041	RPS27A/UBA52	2	Esophagus_Gastroesophageal_Junction	rs34238187
GOBP_NUCLEOTIDE_EXCISION_REPAIR_DNA_INCISION	GOBP_NUCLEOTIDE_EXCISION_REPAIR_DNA_INCISION	0.00139478	0.0083605	0.00923041	RPS27A/UBA52	2	Esophagus_Gastroesophageal_Junction	rs34238187
REACTOME_FANCONI_ANEMIA_PATHWAY	REACTOME_FANCONI_ANEMIA_PATHWAY	0.00139478	0.0083605	0.00923041	RPS27A/UBA52	2	Esophagus_Gastroesophageal_Junction	rs34238187
REACTOME_TRANSLESION_SYNTHESIS_BY_Y_FAMILY_DNA_POLYMERASES_BYPASSES_LESIONS_ON_DNA_TEMPLATE	REACTOME_TRANSLESION_SYNTHESIS_BY_Y_FAMILY_DNA_POLYMERASES_BYPASSES_LESIONS_ON_DNA_TEMPLATE	0.00139478	0.0083605	0.00923041	RPS27A/UBA52	2	Esophagus_Gastroesophageal_Junction	rs34238187
GOBP_VIRION_ASSEMBLY	GOBP_VIRION_ASSEMBLY	0.00146686	0.00869094	0.0096404	RPS27A/UBA52	2	Esophagus_Gastroesophageal_Junction	rs34238187
REACTOME_SIGNALING_BY_FGFR3	REACTOME_SIGNALING_BY_FGFR3	0.00146686	0.00869094	0.0096404	RPS27A/UBA52	2	Esophagus_Gastroesophageal_Junction	rs34238187
REACTOME_CELLULAR_RESPONSE_TO_CHEMICAL_STRESS	REACTOME_CELLULAR_RESPONSE_TO_CHEMICAL_STRESS	0.00151376	0.00891725	0.00991436	PRDX5/RPS27A/UBA52	3	Esophagus_Gastroesophageal_Junction	rs34238187
GOBP_NUCLEOTIDE_BINDING_DOMAIN_LEUCINE_RICH_REPEAT_CONTAINING_RECEPTOR_SIGNALING_PATHWAY	GOBP_NUCLEOTIDE_BINDING_DOMAIN_LEUCINE_RICH_REPEAT_CONTAINING_RECEPTOR_SIGNALING_PATHWAY	0.00154069	0.0089221	0.0100218	RPS27A/UBA52	2	Esophagus_Gastroesophageal_Junction	rs34238187
REACTOME_DUAL_INCISION_IN_GG_NER	REACTOME_DUAL_INCISION_IN_GG_NER	0.00154069	0.0089221	0.0100218	RPS27A/UBA52	2	Esophagus_Gastroesophageal_Junction	rs34238187
REACTOME_SIGNALING_BY_FGFR4	REACTOME_SIGNALING_BY_FGFR4	0.00154069	0.0089221	0.0100218	RPS27A/UBA52	2	Esophagus_Gastroesophageal_Junction	rs34238187
GOBP_TRANSLESION_SYNTHESIS	GOBP_TRANSLESION_SYNTHESIS	0.00161627	0.00925518	0.0104597	RPS27A/UBA52	2	Esophagus_Gastroesophageal_Junction	rs34238187
REACTOME_DEACTIVATION_OF_THE_BETA_CATENIN_TRANSACTIVATING_COMPLEX	REACTOME_DEACTIVATION_OF_THE_BETA_CATENIN_TRANSACTIVATING_COMPLEX	0.00161627	0.00925518	0.0104597	RPS27A/UBA52	2	Esophagus_Gastroesophageal_Junction	rs34238187
REACTOME_FORMATION_OF_INCISION_COMPLEX_IN_GG_NER	REACTOME_FORMATION_OF_INCISION_COMPLEX_IN_GG_NER	0.00169358	0.00959074	0.010886	RPS27A/UBA52	2	Esophagus_Gastroesophageal_Junction	rs34238187
REACTOME_NEGATIVE_REGULATION_OF_MAPK_PATHWAY	REACTOME_NEGATIVE_REGULATION_OF_MAPK_PATHWAY	0.00169358	0.00959074	0.010886	RPS27A/UBA52	2	Esophagus_Gastroesophageal_Junction	rs34238187
REACTOME_TRANSCRIPTIONAL_REGULATION_BY_TP53	REACTOME_TRANSCRIPTIONAL_REGULATION_BY_TP53	0.00172332	0.00970549	0.0110399	PRDX5/RPS27A/UBA52/G6PD	4	Esophagus_Gastroesophageal_Junction	rs34238187
REACTOME_AGGREPHAGY	REACTOME_AGGREPHAGY	0.00177263	0.00982134	0.0112798	RPS27A/UBA52	2	Esophagus_Gastroesophageal_Junction	rs34238187
REACTOME_TNF_SIGNALING	REACTOME_TNF_SIGNALING	0.00177263	0.00982134	0.0112798	RPS27A/UBA52	2	Esophagus_Gastroesophageal_Junction	rs34238187
REACTOME_TRANSCRIPTIONAL_ACTIVITY_OF_SMAD2_SMAD3_SMAD4_HETEROTRIMER	REACTOME_TRANSCRIPTIONAL_ACTIVITY_OF_SMAD2_SMAD3_SMAD4_HETEROTRIMER	0.00177263	0.00982134	0.0112798	RPS27A/UBA52	2	Esophagus_Gastroesophageal_Junction	rs34238187
GOMF_GENERAL_TRANSCRIPTION_INITIATION_FACTOR_BINDING	GOMF_GENERAL_TRANSCRIPTION_INITIATION_FACTOR_BINDING	0.00185341	0.0102137	0.0116381	FBL/EDF1	2	Esophagus_Gastroesophageal_Junction	rs34238187
REACTOME_CYCLIN_D_ASSOCIATED_EVENTS_IN_G1	REACTOME_CYCLIN_D_ASSOCIATED_EVENTS_IN_G1	0.00202012	0.0110729	0.0124994	RPS27A/UBA52	2	Esophagus_Gastroesophageal_Junction	rs34238187
GOMF_ENZYME_INHIBITOR_ACTIVITY	GOMF_ENZYME_INHIBITOR_ACTIVITY	0.00209366	0.0113021	0.0128915	PRDX5/RPL11/SERPING1/GMFG	4	Esophagus_Gastroesophageal_Junction	rs34238187
REACTOME_DNA_DAMAGE_BYPASS	REACTOME_DNA_DAMAGE_BYPASS	0.00210606	0.0113021	0.0129052	RPS27A/UBA52	2	Esophagus_Gastroesophageal_Junction	rs34238187
REACTOME_INTERLEUKIN_3_INTERLEUKIN_5_AND_GM_CSF_SIGNALING	REACTOME_INTERLEUKIN_3_INTERLEUKIN_5_AND_GM_CSF_SIGNALING	0.00210606	0.0113021	0.0129052	RPS27A/UBA52	2	Esophagus_Gastroesophageal_Junction	rs34238187
REACTOME_NOTCH1_INTRACELLULAR_DOMAIN_REGULATES_TRANSCRIPTION	REACTOME_NOTCH1_INTRACELLULAR_DOMAIN_REGULATES_TRANSCRIPTION	0.00210606	0.0113021	0.0129052	RPS27A/UBA52	2	Esophagus_Gastroesophageal_Junction	rs34238187
REACTOME_SIGNALING_BY_NOTCH3	REACTOME_SIGNALING_BY_NOTCH3	0.0021937	0.0117111	0.0132924	RPS27A/UBA52	2	Esophagus_Gastroesophageal_Junction	rs34238187
GOBP_NCRNA_3_END_PROCESSING	GOBP_NCRNA_3_END_PROCESSING	0.00228304	0.0119394	0.0136123	FBL/RPS21	2	Esophagus_Gastroesophageal_Junction	rs34238187
REACTOME_SIGNALING_BY_EGFR	REACTOME_SIGNALING_BY_EGFR	0.00228304	0.0119394	0.0136123	RPS27A/UBA52	2	Esophagus_Gastroesophageal_Junction	rs34238187
REACTOME_SIGNALING_BY_ERBB2	REACTOME_SIGNALING_BY_ERBB2	0.00228304	0.0119394	0.0136123	RPS27A/UBA52	2	Esophagus_Gastroesophageal_Junction	rs34238187
REACTOME_SIGNALING_BY_FGFR1	REACTOME_SIGNALING_BY_FGFR1	0.00228304	0.0119394	0.0136123	RPS27A/UBA52	2	Esophagus_Gastroesophageal_Junction	rs34238187
GOBP_POSTREPLICATION_REPAIR	GOBP_POSTREPLICATION_REPAIR	0.00246683	0.012835	0.0136123	RPS27A/UBA52	2	Esophagus_Gastroesophageal_Junction	rs34238187
REACTOME_SEPARATION_OF_SISTER_CHROMATIDS	REACTOME_SEPARATION_OF_SISTER_CHROMATIDS	0.00250485	0.0129671	0.0136123	RPS27A/UBA52/RPS27	3	Esophagus_Gastroesophageal_Junction	rs34238187
GOBP_DNA_SYNTHESIS_INVOLVED_IN_DNA_REPAIR	GOBP_DNA_SYNTHESIS_INVOLVED_IN_DNA_REPAIR	0.00256126	0.0131264	0.0136123	RPS27A/UBA52	2	Esophagus_Gastroesophageal_Junction	rs34238187
REACTOME_FORMATION_OF_TC_NER_PRE_INCISION_COMPLEX	REACTOME_FORMATION_OF_TC_NER_PRE_INCISION_COMPLEX	0.00256126	0.0131264	0.0136123	RPS27A/UBA52	2	Esophagus_Gastroesophageal_Junction	rs34238187
REACTOME_NEGATIVE_REGULATION_OF_NOTCH4_SIGNALING	REACTOME_NEGATIVE_REGULATION_OF_NOTCH4_SIGNALING	0.00265737	0.0134842	0.0136123	RPS27A/UBA52	2	Esophagus_Gastroesophageal_Junction	rs34238187
REACTOME_SIGNALING_BY_PTK6	REACTOME_SIGNALING_BY_PTK6	0.00265737	0.0134842	0.0136123	RPS27A/UBA52	2	Esophagus_Gastroesophageal_Junction	rs34238187
REACTOME_AUF1_HNRNP_D0_BINDS_AND_DESTABILIZES_MRNA	REACTOME_AUF1_HNRNP_D0_BINDS_AND_DESTABILIZES_MRNA	0.00275517	0.0137758	0.0136123	RPS27A/UBA52	2	Esophagus_Gastroesophageal_Junction	rs34238187
REACTOME_DEGRADATION_OF_AXIN	REACTOME_DEGRADATION_OF_AXIN	0.00275517	0.0137758	0.0136123	RPS27A/UBA52	2	Esophagus_Gastroesophageal_Junction	rs34238187
REACTOME_REGULATION_OF_RUNX3_EXPRESSION_AND_ACTIVITY	REACTOME_REGULATION_OF_RUNX3_EXPRESSION_AND_ACTIVITY	0.00275517	0.0137758	0.0136123	RPS27A/UBA52	2	Esophagus_Gastroesophageal_Junction	rs34238187
REACTOME_GOLGI_ASSOCIATED_VESICLE_BIOGENESIS	REACTOME_GOLGI_ASSOCIATED_VESICLE_BIOGENESIS	0.00285464	0.0140673	0.0136123	FTL/CLTA	2	Esophagus_Gastroesophageal_Junction	rs34238187
REACTOME_NUCLEOTIDE_BINDING_DOMAIN_LEUCINE_RICH_REPEAT_CONTAINING_RECEPTOR_NLR_SIGNALING_PATHWAYS	REACTOME_NUCLEOTIDE_BINDING_DOMAIN_LEUCINE_RICH_REPEAT_CONTAINING_RECEPTOR_NLR_SIGNALING_PATHWAYS	0.00285464	0.0140673	0.0136123	RPS27A/UBA52	2	Esophagus_Gastroesophageal_Junction	rs34238187
REACTOME_REGULATED_NECROSIS	REACTOME_REGULATED_NECROSIS	0.00285464	0.0140673	0.0136123	RPS27A/UBA52	2	Esophagus_Gastroesophageal_Junction	rs34238187
GOBP_INTERSTRAND_CROSS_LINK_REPAIR	GOBP_INTERSTRAND_CROSS_LINK_REPAIR	0.00295578	0.0143586	0.0139894	RPS27A/UBA52	2	Esophagus_Gastroesophageal_Junction	rs34238187
REACTOME_DEGRADATION_OF_DVL	REACTOME_DEGRADATION_OF_DVL	0.00295578	0.0143586	0.0139894	RPS27A/UBA52	2	Esophagus_Gastroesophageal_Junction	rs34238187
REACTOME_STABILIZATION_OF_P53	REACTOME_STABILIZATION_OF_P53	0.00295578	0.0143586	0.0139894	RPS27A/UBA52	2	Esophagus_Gastroesophageal_Junction	rs34238187
REACTOME_INTERFERON_SIGNALING	REACTOME_INTERFERON_SIGNALING	0.00297451	0.0143815	0.0140606	RPS27A/UBA52/IFITM1	3	Esophagus_Gastroesophageal_Junction	rs34238187
REACTOME_SIGNALING_BY_ERBB4	REACTOME_SIGNALING_BY_ERBB4	0.00305859	0.0146498	0.0144222	RPS27A/UBA52	2	Esophagus_Gastroesophageal_Junction	rs34238187
REACTOME_SIGNALING_BY_NOTCH1_PEST_DOMAIN_MUTANTS_IN_CANCER	REACTOME_SIGNALING_BY_NOTCH1_PEST_DOMAIN_MUTANTS_IN_CANCER	0.00305859	0.0146498	0.0144222	RPS27A/UBA52	2	Esophagus_Gastroesophageal_Junction	rs34238187
REACTOME_E3_UBIQUITIN_LIGASES_UBIQUITINATE_TARGET_PROTEINS	REACTOME_E3_UBIQUITIN_LIGASES_UBIQUITINATE_TARGET_PROTEINS	0.00316305	0.0150797	0.0148779	RPS27A/UBA52	2	Esophagus_Gastroesophageal_Junction	rs34238187
REACTOME_DEGRADATION_OF_GLI1_BY_THE_PROTEASOME	REACTOME_DEGRADATION_OF_GLI1_BY_THE_PROTEASOME	0.00326918	0.0153836	0.0152951	RPS27A/UBA52	2	Esophagus_Gastroesophageal_Junction	rs34238187
REACTOME_SCF_SKP2_MEDIATED_DEGRADATION_OF_P27_P21	REACTOME_SCF_SKP2_MEDIATED_DEGRADATION_OF_P27_P21	0.00326918	0.0153836	0.0152951	RPS27A/UBA52	2	Esophagus_Gastroesophageal_Junction	rs34238187
GOBP_REGULATION_OF_MRNA_CATABOLIC_PROCESS	GOBP_REGULATION_OF_MRNA_CATABOLIC_PROCESS	0.00327184	0.0153836	0.0152951	CARHSP1/RPS27A/UBA52	3	Esophagus_Gastroesophageal_Junction	rs34238187
REACTOME_DEFECTIVE_CFTR_CAUSES_CYSTIC_FIBROSIS	REACTOME_DEFECTIVE_CFTR_CAUSES_CYSTIC_FIBROSIS	0.00337696	0.0158054	0.0157285	RPS27A/UBA52	2	Esophagus_Gastroesophageal_Junction	rs34238187
REACTOME_DECTIN_1_MEDIATED_NONCANONICAL_NF_KB_SIGNALING	REACTOME_DECTIN_1_MEDIATED_NONCANONICAL_NF_KB_SIGNALING	0.00348638	0.0162434	0.0161591	RPS27A/UBA52	2	Esophagus_Gastroesophageal_Junction	rs34238187
REACTOME_CYTOSOLIC_SENSORS_OF_PATHOGEN_ASSOCIATED_DNA	REACTOME_CYTOSOLIC_SENSORS_OF_PATHOGEN_ASSOCIATED_DNA	0.00359745	0.0166098	0.0165729	RPS27A/UBA52	2	Esophagus_Gastroesophageal_Junction	rs34238187
REACTOME_PEROXISOMAL_PROTEIN_IMPORT	REACTOME_PEROXISOMAL_PROTEIN_IMPORT	0.00359745	0.0166098	0.0165729	RPS27A/UBA52	2	Esophagus_Gastroesophageal_Junction	rs34238187
REACTOME_ASYMMETRIC_LOCALIZATION_OF_PCP_PROTEINS	REACTOME_ASYMMETRIC_LOCALIZATION_OF_PCP_PROTEINS	0.00371016	0.0170534	0.0170303	RPS27A/UBA52	2	Esophagus_Gastroesophageal_Junction	rs34238187
GOBP_NEGATIVE_REGULATION_OF_INNATE_IMMUNE_RESPONSE	GOBP_NEGATIVE_REGULATION_OF_INNATE_IMMUNE_RESPONSE	0.00382449	0.0172692	0.0174499	SERPING1/RPS19	2	Esophagus_Gastroesophageal_Junction	rs34238187
REACTOME_DUAL_INCISION_IN_TC_NER	REACTOME_DUAL_INCISION_IN_TC_NER	0.00382449	0.0172692	0.0174499	RPS27A/UBA52	2	Esophagus_Gastroesophageal_Junction	rs34238187
REACTOME_HEDGEHOG_LIGAND_BIOGENESIS	REACTOME_HEDGEHOG_LIGAND_BIOGENESIS	0.00382449	0.0172692	0.0174499	RPS27A/UBA52	2	Esophagus_Gastroesophageal_Junction	rs34238187
REACTOME_REGULATION_OF_HMOX1_EXPRESSION_AND_ACTIVITY	REACTOME_REGULATION_OF_HMOX1_EXPRESSION_AND_ACTIVITY	0.00382449	0.0172692	0.0174499	RPS27A/UBA52	2	Esophagus_Gastroesophageal_Junction	rs34238187
GOBP_MULTI_ORGANISM_LOCALIZATION	GOBP_MULTI_ORGANISM_LOCALIZATION	0.00394046	0.0177148	0.0179575	RPS27A/UBA52	2	Esophagus_Gastroesophageal_Junction	rs34238187
GOMF_TRANSFERASE_ACTIVITY_TRANSFERRING_ONE_CARBON_GROUPS	GOMF_TRANSFERASE_ACTIVITY_TRANSFERRING_ONE_CARBON_GROUPS	0.00401816	0.0179852	0.0182678	FBL/MGMT/METTL21EP	3	Esophagus_Gastroesophageal_Junction	rs34238187
REACTOME_HDR_THROUGH_HOMOLOGOUS_RECOMBINATION_HRR	REACTOME_HDR_THROUGH_HOMOLOGOUS_RECOMBINATION_HRR	0.00405805	0.0180848	0.0184272	RPS27A/UBA52	2	Esophagus_Gastroesophageal_Junction	rs34238187
REACTOME_ASSEMBLY_OF_THE_PRE_REPLICATIVE_COMPLEX	REACTOME_ASSEMBLY_OF_THE_PRE_REPLICATIVE_COMPLEX	0.00417726	0.0183764	0.0187669	RPS27A/UBA52	2	Esophagus_Gastroesophageal_Junction	rs34238187
REACTOME_G1_S_DNA_DAMAGE_CHECKPOINTS	REACTOME_G1_S_DNA_DAMAGE_CHECKPOINTS	0.00417726	0.0183764	0.0187669	RPS27A/UBA52	2	Esophagus_Gastroesophageal_Junction	rs34238187
REACTOME_REGULATION_OF_RAS_BY_GAPS	REACTOME_REGULATION_OF_RAS_BY_GAPS	0.00417726	0.0183764	0.0187669	RPS27A/UBA52	2	Esophagus_Gastroesophageal_Junction	rs34238187
GOMF_BASAL_TRANSCRIPTION_MACHINERY_BINDING	GOMF_BASAL_TRANSCRIPTION_MACHINERY_BINDING	0.00429809	0.018747	0.019219	FBL/EDF1	2	Esophagus_Gastroesophageal_Junction	rs34238187
REACTOME_REGULATION_OF_PTEN_STABILITY_AND_ACTIVITY	REACTOME_REGULATION_OF_PTEN_STABILITY_AND_ACTIVITY	0.00429809	0.018747	0.019219	RPS27A/UBA52	2	Esophagus_Gastroesophageal_Junction	rs34238187
REACTOME_CIRCADIAN_CLOCK	REACTOME_CIRCADIAN_CLOCK	0.00442053	0.0191993	0.0197433	RPS27A/UBA52	2	Esophagus_Gastroesophageal_Junction	rs34238187
REACTOME_MITOTIC_METAPHASE_AND_ANAPHASE	REACTOME_MITOTIC_METAPHASE_AND_ANAPHASE	0.00453305	0.0194091	0.0201789	RPS27A/UBA52/RPS27	3	Esophagus_Gastroesophageal_Junction	rs34238187
REACTOME_INTERLEUKIN_17_SIGNALING	REACTOME_INTERLEUKIN_17_SIGNALING	0.00454457	0.0194091	0.0201789	RPS27A/UBA52	2	Esophagus_Gastroesophageal_Junction	rs34238187
REACTOME_ORC1_REMOVAL_FROM_CHROMATIN	REACTOME_ORC1_REMOVAL_FROM_CHROMATIN	0.00454457	0.0194091	0.0201789	RPS27A/UBA52	2	Esophagus_Gastroesophageal_Junction	rs34238187
REACTOME_PLASMA_LIPOPROTEIN_ASSEMBLY_REMODELING_AND_CLEARANCE	REACTOME_PLASMA_LIPOPROTEIN_ASSEMBLY_REMODELING_AND_CLEARANCE	0.00454457	0.0194091	0.0201789	NPC2/CLTA	2	Esophagus_Gastroesophageal_Junction	rs34238187
GOBP_CYTOPLASMIC_PATTERN_RECOGNITION_RECEPTOR_SIGNALING_PATHWAY	GOBP_CYTOPLASMIC_PATTERN_RECOGNITION_RECEPTOR_SIGNALING_PATHWAY	0.00467021	0.0196994	0.0206404	RPS27A/UBA52	2	Esophagus_Gastroesophageal_Junction	rs34238187
GOBP_PEROXISOMAL_TRANSPORT	GOBP_PEROXISOMAL_TRANSPORT	0.00467021	0.0196994	0.0206404	RPS27A/UBA52	2	Esophagus_Gastroesophageal_Junction	rs34238187
REACTOME_TRANS_GOLGI_NETWORK_VESICLE_BUDDING	REACTOME_TRANS_GOLGI_NETWORK_VESICLE_BUDDING	0.00467021	0.0196994	0.0206404	FTL/CLTA	2	Esophagus_Gastroesophageal_Junction	rs34238187
GOBP_TRANSCRIPTION_COUPLED_NUCLEOTIDE_EXCISION_REPAIR	GOBP_TRANSCRIPTION_COUPLED_NUCLEOTIDE_EXCISION_REPAIR	0.00479745	0.0199084	0.0210803	RPS27A/UBA52	2	Esophagus_Gastroesophageal_Junction	rs34238187
REACTOME_REGULATION_OF_RUNX2_EXPRESSION_AND_ACTIVITY	REACTOME_REGULATION_OF_RUNX2_EXPRESSION_AND_ACTIVITY	0.00479745	0.0199084	0.0210803	RPS27A/UBA52	2	Esophagus_Gastroesophageal_Junction	rs34238187
REACTOME_SIGNALING_BY_FGFR2	REACTOME_SIGNALING_BY_FGFR2	0.00479745	0.0199084	0.0210803	RPS27A/UBA52	2	Esophagus_Gastroesophageal_Junction	rs34238187
REACTOME_SIGNALING_BY_TGF_BETA_RECEPTOR_COMPLEX	REACTOME_SIGNALING_BY_TGF_BETA_RECEPTOR_COMPLEX	0.00479745	0.0199084	0.0210803	RPS27A/UBA52	2	Esophagus_Gastroesophageal_Junction	rs34238187
GOBP_ENDOSOMAL_TRANSPORT	GOBP_ENDOSOMAL_TRANSPORT	0.0048603	0.0200879	0.021259	RAB13/RPS27A/UBA52	3	Esophagus_Gastroesophageal_Junction	rs34238187
REACTOME_APC_C_CDH1_MEDIATED_DEGRADATION_OF_CDC20_AND_OTHER_APC_C_CDH1_TARGETED_PROTEINS_IN_LATE_MITOSIS_EARLY_G1	REACTOME_APC_C_CDH1_MEDIATED_DEGRADATION_OF_CDC20_AND_OTHER_APC_C_CDH1_TARGETED_PROTEINS_IN_LATE_MITOSIS_EARLY_G1	0.00492628	0.0201977	0.0214975	RPS27A/UBA52	2	Esophagus_Gastroesophageal_Junction	rs34238187
REACTOME_SIGNALING_BY_NOTCH1	REACTOME_SIGNALING_BY_NOTCH1	0.00492628	0.0201977	0.0214975	RPS27A/UBA52	2	Esophagus_Gastroesophageal_Junction	rs34238187
REACTOME_CELLULAR_RESPONSE_TO_HYPOXIA	REACTOME_CELLULAR_RESPONSE_TO_HYPOXIA	0.0050567	0.0206499	0.0220161	RPS27A/UBA52	2	Esophagus_Gastroesophageal_Junction	rs34238187
REACTOME_CELL_DEATH_SIGNALLING_VIA_NRAGE_NRIF_AND_NADE	REACTOME_CELL_DEATH_SIGNALLING_VIA_NRAGE_NRIF_AND_NADE	0.0051887	0.0211048	0.0225135	RPS27A/UBA52	2	Esophagus_Gastroesophageal_Junction	rs34238187
GOBP_HOMEOSTASIS_OF_NUMBER_OF_CELLS	GOBP_HOMEOSTASIS_OF_NUMBER_OF_CELLS	0.00525974	0.0213092	0.0227698	G6PD/RPS17/RPS19	3	Esophagus_Gastroesophageal_Junction	rs34238187
GOBP_REGULATION_OF_TRANSCRIPTION_FROM_RNA_POLYMERASE_II_PROMOTER_IN_RESPONSE_TO_HYPOXIA	GOBP_REGULATION_OF_TRANSCRIPTION_FROM_RNA_POLYMERASE_II_PROMOTER_IN_RESPONSE_TO_HYPOXIA	0.00532227	0.0213935	0.0229102	RPS27A/UBA52	2	Esophagus_Gastroesophageal_Junction	rs34238187
REACTOME_ABC_TRANSPORTER_DISORDERS	REACTOME_ABC_TRANSPORTER_DISORDERS	0.00532227	0.0213935	0.0229102	RPS27A/UBA52	2	Esophagus_Gastroesophageal_Junction	rs34238187
GOBP_ANTIMICROBIAL_HUMORAL_IMMUNE_RESPONSE_MEDIATED_BY_ANTIMICROBIAL_PEPTIDE	GOBP_ANTIMICROBIAL_HUMORAL_IMMUNE_RESPONSE_MEDIATED_BY_ANTIMICROBIAL_PEPTIDE	0.00545743	0.0215979	0.0233599	RPL39/RPS19	2	Esophagus_Gastroesophageal_Junction	rs34238187
GOBP_RNA_PHOSPHODIESTER_BOND_HYDROLYSIS_ENDONUCLEOLYTIC	GOBP_RNA_PHOSPHODIESTER_BOND_HYDROLYSIS_ENDONUCLEOLYTIC	0.00545743	0.0215979	0.0233599	RNASEK/RPS21	2	Esophagus_Gastroesophageal_Junction	rs34238187
REACTOME_DNA_DOUBLE_STRAND_BREAK_RESPONSE	REACTOME_DNA_DOUBLE_STRAND_BREAK_RESPONSE	0.00545743	0.0215979	0.0233599	RPS27A/UBA52	2	Esophagus_Gastroesophageal_Junction	rs34238187
REACTOME_TRANSCRIPTION_COUPLED_NUCLEOTIDE_EXCISION_REPAIR_TC_NER	REACTOME_TRANSCRIPTION_COUPLED_NUCLEOTIDE_EXCISION_REPAIR_TC_NER	0.00545743	0.0215979	0.0233599	RPS27A/UBA52	2	Esophagus_Gastroesophageal_Junction	rs34238187
REACTOME_PROTEIN_UBIQUITINATION	REACTOME_PROTEIN_UBIQUITINATION	0.00559415	0.0218855	0.0238112	RPS27A/UBA52	2	Esophagus_Gastroesophageal_Junction	rs34238187
REACTOME_SIGNALING_BY_MET	REACTOME_SIGNALING_BY_MET	0.00559415	0.0218855	0.0238112	RPS27A/UBA52	2	Esophagus_Gastroesophageal_Junction	rs34238187
REACTOME_THE_ROLE_OF_GTSE1_IN_G2_M_PROGRESSION_AFTER_G2_CHECKPOINT	REACTOME_THE_ROLE_OF_GTSE1_IN_G2_M_PROGRESSION_AFTER_G2_CHECKPOINT	0.00559415	0.0218855	0.0238112	RPS27A/UBA52	2	Esophagus_Gastroesophageal_Junction	rs34238187
REACTOME_DDX58_IFIH1_MEDIATED_INDUCTION_OF_INTERFERON_ALPHA_BETA	REACTOME_DDX58_IFIH1_MEDIATED_INDUCTION_OF_INTERFERON_ALPHA_BETA	0.00587228	0.0227996	0.0248837	RPS27A/UBA52	2	Esophagus_Gastroesophageal_Junction	rs34238187
REACTOME_DOWNSTREAM_SIGNALING_EVENTS_OF_B_CELL_RECEPTOR_BCR	REACTOME_DOWNSTREAM_SIGNALING_EVENTS_OF_B_CELL_RECEPTOR_BCR	0.00587228	0.0227996	0.0248837	RPS27A/UBA52	2	Esophagus_Gastroesophageal_Junction	rs34238187
REACTOME_ANTIVIRAL_MECHANISM_BY_IFN_STIMULATED_GENES	REACTOME_ANTIVIRAL_MECHANISM_BY_IFN_STIMULATED_GENES	0.00601368	0.0230862	0.0253699	RPS27A/UBA52	2	Esophagus_Gastroesophageal_Junction	rs34238187
REACTOME_SELECTIVE_AUTOPHAGY	REACTOME_SELECTIVE_AUTOPHAGY	0.00601368	0.0230862	0.0253699	RPS27A/UBA52	2	Esophagus_Gastroesophageal_Junction	rs34238187
REACTOME_SIGNALING_BY_NOTCH4	REACTOME_SIGNALING_BY_NOTCH4	0.00601368	0.0230862	0.0253699	RPS27A/UBA52	2	Esophagus_Gastroesophageal_Junction	rs34238187
GOBP_ANAPHASE_PROMOTING_COMPLEX_DEPENDENT_CATABOLIC_PROCESS	GOBP_ANAPHASE_PROMOTING_COMPLEX_DEPENDENT_CATABOLIC_PROCESS	0.00615663	0.0235468	0.0259155	RPS27A/UBA52	2	Esophagus_Gastroesophageal_Junction	rs34238187
GOBP_PEROXISOME_ORGANIZATION	GOBP_PEROXISOME_ORGANIZATION	0.00630113	0.023921	0.0264069	RPS27A/UBA52	2	Esophagus_Gastroesophageal_Junction	rs34238187
REACTOME_GLOBAL_GENOME_NUCLEOTIDE_EXCISION_REPAIR_GG_NER	REACTOME_GLOBAL_GENOME_NUCLEOTIDE_EXCISION_REPAIR_GG_NER	0.00630113	0.023921	0.0264069	RPS27A/UBA52	2	Esophagus_Gastroesophageal_Junction	rs34238187
GOMF_PROTEIN_METHYLTRANSFERASE_ACTIVITY	GOMF_PROTEIN_METHYLTRANSFERASE_ACTIVITY	0.00644717	0.0241181	0.0269004	FBL/METTL21EP	2	Esophagus_Gastroesophageal_Junction	rs34238187
REACTOME_CYCLIN_A_CDK2_ASSOCIATED_EVENTS_AT_S_PHASE_ENTRY	REACTOME_CYCLIN_A_CDK2_ASSOCIATED_EVENTS_AT_S_PHASE_ENTRY	0.00644717	0.0241181	0.0269004	RPS27A/UBA52	2	Esophagus_Gastroesophageal_Junction	rs34238187
REACTOME_DEGRADATION_OF_BETA_CATENIN_BY_THE_DESTRUCTION_COMPLEX	REACTOME_DEGRADATION_OF_BETA_CATENIN_BY_THE_DESTRUCTION_COMPLEX	0.00644717	0.0241181	0.0269004	RPS27A/UBA52	2	Esophagus_Gastroesophageal_Junction	rs34238187
REACTOME_DNA_REPLICATION_PRE_INITIATION	REACTOME_DNA_REPLICATION_PRE_INITIATION	0.00644717	0.0241181	0.0269004	RPS27A/UBA52	2	Esophagus_Gastroesophageal_Junction	rs34238187
GOBP_NEGATIVE_REGULATION_OF_TRANSFORMING_GROWTH_FACTOR_BETA_RECEPTOR_SIGNALING_PATHWAY	GOBP_NEGATIVE_REGULATION_OF_TRANSFORMING_GROWTH_FACTOR_BETA_RECEPTOR_SIGNALING_PATHWAY	0.00659475	0.0244914	0.027456	RPS27A/UBA52	2	Esophagus_Gastroesophageal_Junction	rs34238187
REACTOME_HEDGEHOG_ON_STATE	REACTOME_HEDGEHOG_ON_STATE	0.00659475	0.0244914	0.027456	RPS27A/UBA52	2	Esophagus_Gastroesophageal_Junction	rs34238187
REACTOME_REGULATION_OF_MRNA_STABILITY_BY_PROTEINS_THAT_BIND_AU_RICH_ELEMENTS	REACTOME_REGULATION_OF_MRNA_STABILITY_BY_PROTEINS_THAT_BIND_AU_RICH_ELEMENTS	0.00674386	0.0246873	0.0278634	RPS27A/UBA52	2	Esophagus_Gastroesophageal_Junction	rs34238187
REACTOME_REGULATION_OF_PLK1_ACTIVITY_AT_G2_M_TRANSITION	REACTOME_REGULATION_OF_PLK1_ACTIVITY_AT_G2_M_TRANSITION	0.00674386	0.0246873	0.0278634	RPS27A/UBA52	2	Esophagus_Gastroesophageal_Junction	rs34238187
REACTOME_SIGNALING_BY_FGFR	REACTOME_SIGNALING_BY_FGFR	0.00674386	0.0246873	0.0278634	RPS27A/UBA52	2	Esophagus_Gastroesophageal_Junction	rs34238187
REACTOME_TP53_REGULATES_METABOLIC_GENES	REACTOME_TP53_REGULATES_METABOLIC_GENES	0.00674386	0.0246873	0.0278634	PRDX5/G6PD	2	Esophagus_Gastroesophageal_Junction	rs34238187
REACTOME_APC_C_MEDIATED_DEGRADATION_OF_CELL_CYCLE_PROTEINS	REACTOME_APC_C_MEDIATED_DEGRADATION_OF_CELL_CYCLE_PROTEINS	0.0068945	0.025149	0.0283626	RPS27A/UBA52	2	Esophagus_Gastroesophageal_Junction	rs34238187
GOBP_NEGATIVE_REGULATION_OF_RESPONSE_TO_WOUNDING	GOBP_NEGATIVE_REGULATION_OF_RESPONSE_TO_WOUNDING	0.00720034	0.026079	0.0294615	SPP1/SERPING1	2	Esophagus_Gastroesophageal_Junction	rs34238187
REACTOME_PEPTIDE_HORMONE_METABOLISM	REACTOME_PEPTIDE_HORMONE_METABOLISM	0.00720034	0.026079	0.0294615	CTSD/SEC11A	2	Esophagus_Gastroesophageal_Junction	rs34238187
REACTOME_SWITCHING_OF_ORIGINS_TO_A_POST_REPLICATIVE_STATE	REACTOME_SWITCHING_OF_ORIGINS_TO_A_POST_REPLICATIVE_STATE	0.00735554	0.0265473	0.0299998	RPS27A/UBA52	2	Esophagus_Gastroesophageal_Junction	rs34238187
GOBP_I_KAPPAB_KINASE_NF_KAPPAB_SIGNALING	GOBP_I_KAPPAB_KINASE_NF_KAPPAB_SIGNALING	0.00740604	0.0266358	0.0301411	RPS27A/UBA52/S100A13	3	Esophagus_Gastroesophageal_Junction	rs34238187
REACTOME_REGULATION_OF_TP53_ACTIVITY_THROUGH_PHOSPHORYLATION	REACTOME_REGULATION_OF_TP53_ACTIVITY_THROUGH_PHOSPHORYLATION	0.00751225	0.0269233	0.0304756	RPS27A/UBA52	2	Esophagus_Gastroesophageal_Junction	rs34238187
REACTOME_MAPK6_MAPK4_SIGNALING	REACTOME_MAPK6_MAPK4_SIGNALING	0.00767047	0.0273945	0.0310512	RPS27A/UBA52	2	Esophagus_Gastroesophageal_Junction	rs34238187
REACTOME_TOLL_LIKE_RECEPTOR_9_TLR9_CASCADE	REACTOME_TOLL_LIKE_RECEPTOR_9_TLR9_CASCADE	0.00783019	0.0278679	0.0315635	RPS27A/UBA52	2	Esophagus_Gastroesophageal_Junction	rs34238187
REACTOME_CELL_CYCLE_CHECKPOINTS	REACTOME_CELL_CYCLE_CHECKPOINTS	0.00814452	0.0288863	0.032696	RPS27A/UBA52/RPS27	3	Esophagus_Gastroesophageal_Junction	rs34238187
REACTOME_METABOLISM_OF_CARBOHYDRATES	REACTOME_METABOLISM_OF_CARBOHYDRATES	0.00822067	0.0290558	0.0329282	RPS27A/UBA52/G6PD	3	Esophagus_Gastroesophageal_Junction	rs34238187
REACTOME_MYD88_INDEPENDENT_TLR4_CASCADE	REACTOME_MYD88_INDEPENDENT_TLR4_CASCADE	0.00831831	0.0291996	0.0331796	RPS27A/UBA52	2	Esophagus_Gastroesophageal_Junction	rs34238187
REACTOME_P75_NTR_RECEPTOR_MEDIATED_SIGNALLING	REACTOME_P75_NTR_RECEPTOR_MEDIATED_SIGNALLING	0.00831831	0.0291996	0.0331796	RPS27A/UBA52	2	Esophagus_Gastroesophageal_Junction	rs34238187
GOMF_N_METHYLTRANSFERASE_ACTIVITY	GOMF_N_METHYLTRANSFERASE_ACTIVITY	0.008484	0.0295786	0.0337344	FBL/METTL21EP	2	Esophagus_Gastroesophageal_Junction	rs34238187
REACTOME_PROCESSING_OF_DNA_DOUBLE_STRAND_BREAK_ENDS	REACTOME_PROCESSING_OF_DNA_DOUBLE_STRAND_BREAK_ENDS	0.008484	0.0295786	0.0337344	RPS27A/UBA52	2	Esophagus_Gastroesophageal_Junction	rs34238187
GOBP_NEGATIVE_REGULATION_OF_RESPONSE_TO_BIOTIC_STIMULUS	GOBP_NEGATIVE_REGULATION_OF_RESPONSE_TO_BIOTIC_STIMULUS	0.0088198	0.0305415	0.0348511	SERPING1/RPS19	2	Esophagus_Gastroesophageal_Junction	rs34238187
REACTOME_CLEC7A_DECTIN_1_SIGNALING	REACTOME_CLEC7A_DECTIN_1_SIGNALING	0.0088198	0.0305415	0.0348511	RPS27A/UBA52	2	Esophagus_Gastroesophageal_Junction	rs34238187
REACTOME_TNFR2_NON_CANONICAL_NF_KB_PATHWAY	REACTOME_TNFR2_NON_CANONICAL_NF_KB_PATHWAY	0.00898991	0.0310258	0.0353398	RPS27A/UBA52	2	Esophagus_Gastroesophageal_Junction	rs34238187
REACTOME_INTERLEUKIN_1_SIGNALING	REACTOME_INTERLEUKIN_1_SIGNALING	0.00916149	0.0311145	0.0358524	RPS27A/UBA52	2	Esophagus_Gastroesophageal_Junction	rs34238187
REACTOME_SIGNALING_BY_TGFB_FAMILY_MEMBERS	REACTOME_SIGNALING_BY_TGFB_FAMILY_MEMBERS	0.00916149	0.0311145	0.0358524	RPS27A/UBA52	2	Esophagus_Gastroesophageal_Junction	rs34238187
REACTOME_UCH_PROTEINASES	REACTOME_UCH_PROTEINASES	0.00916149	0.0311145	0.0358524	RPS27A/UBA52	2	Esophagus_Gastroesophageal_Junction	rs34238187
GOBP_MACROMOLECULE_METHYLATION	GOBP_MACROMOLECULE_METHYLATION	0.00916739	0.0311145	0.0358524	FBL/MGMT/METTL21EP	3	Esophagus_Gastroesophageal_Junction	rs34238187
REACTOME_ASPARAGINE_N_LINKED_GLYCOSYLATION	REACTOME_ASPARAGINE_N_LINKED_GLYCOSYLATION	0.00916739	0.0311145	0.0358524	PRKCSH/RPS27A/UBA52	3	Esophagus_Gastroesophageal_Junction	rs34238187
GOBP_INTERLEUKIN_1_MEDIATED_SIGNALING_PATHWAY	GOBP_INTERLEUKIN_1_MEDIATED_SIGNALING_PATHWAY	0.00933453	0.0313701	0.0363938	RPS27A/UBA52	2	Esophagus_Gastroesophageal_Junction	rs34238187
REACTOME_ABC_FAMILY_PROTEINS_MEDIATED_TRANSPORT	REACTOME_ABC_FAMILY_PROTEINS_MEDIATED_TRANSPORT	0.00933453	0.0313701	0.0363938	RPS27A/UBA52	2	Esophagus_Gastroesophageal_Junction	rs34238187
REACTOME_TOLL_LIKE_RECEPTOR_TLR1_TLR2_CASCADE	REACTOME_TOLL_LIKE_RECEPTOR_TLR1_TLR2_CASCADE	0.00933453	0.0313701	0.0363938	RPS27A/UBA52	2	Esophagus_Gastroesophageal_Junction	rs34238187
REACTOME_ANTIGEN_PROCESSING_UBIQUITINATION_PROTEASOME_DEGRADATION	REACTOME_ANTIGEN_PROCESSING_UBIQUITINATION_PROTEASOME_DEGRADATION	0.00941363	0.0315326	0.0366646	HECTD2/RPS27A/UBA52	3	Esophagus_Gastroesophageal_Junction	rs34238187
GOBP_ANTIGEN_PROCESSING_AND_PRESENTATION_OF_PEPTIDE_OR_POLYSACCHARIDE_ANTIGEN_VIA_MHC_CLASS_II	GOBP_ANTIGEN_PROCESSING_AND_PRESENTATION_OF_PEPTIDE_OR_POLYSACCHARIDE_ANTIGEN_VIA_MHC_CLASS_II	0.00950903	0.0317484	0.0369605	CTSD/CLTA	2	Esophagus_Gastroesophageal_Junction	rs34238187
GOMF_UBIQUITIN_LIKE_PROTEIN_LIGASE_BINDING	GOMF_UBIQUITIN_LIKE_PROTEIN_LIGASE_BINDING	0.00974795	0.0324404	0.0378119	RPS27A/RPL11/UBA52	3	Esophagus_Gastroesophageal_Junction	rs34238187
REACTOME_ANTIGEN_PROCESSING_CROSS_PRESENTATION	REACTOME_ANTIGEN_PROCESSING_CROSS_PRESENTATION	0.00986239	0.0326095	0.0381392	RPS27A/UBA52	2	Esophagus_Gastroesophageal_Junction	rs34238187
REACTOME_STIMULI_SENSING_CHANNELS	REACTOME_STIMULI_SENSING_CHANNELS	0.00986239	0.0326095	0.0381392	RPS27A/UBA52	2	Esophagus_Gastroesophageal_Junction	rs34238187
GOBP_NEGATIVE_REGULATION_OF_DEVELOPMENTAL_GROWTH	GOBP_NEGATIVE_REGULATION_OF_DEVELOPMENTAL_GROWTH	0.0100412	0.0330941	0.0387914	SPP1/G6PD	2	Esophagus_Gastroesophageal_Junction	rs34238187
GOBP_NUCLEOTIDE_EXCISION_REPAIR	GOBP_NUCLEOTIDE_EXCISION_REPAIR	0.0102215	0.0335803	0.0394479	RPS27A/UBA52	2	Esophagus_Gastroesophageal_Junction	rs34238187
REACTOME_AMYLOID_FIBER_FORMATION	REACTOME_AMYLOID_FIBER_FORMATION	0.0105864	0.0345576	0.04065	RPS27A/UBA52	2	Esophagus_Gastroesophageal_Junction	rs34238187
REACTOME_NUCLEOTIDE_EXCISION_REPAIR	REACTOME_NUCLEOTIDE_EXCISION_REPAIR	0.0105864	0.0345576	0.04065	RPS27A/UBA52	2	Esophagus_Gastroesophageal_Junction	rs34238187
REACTOME_SENESCENCE_ASSOCIATED_SECRETORY_PHENOTYPE_SASP	REACTOME_SENESCENCE_ASSOCIATED_SECRETORY_PHENOTYPE_SASP	0.010957	0.0356538	0.0419039	RPS27A/UBA52	2	Esophagus_Gastroesophageal_Junction	rs34238187
REACTOME_HEDGEHOG_OFF_STATE	REACTOME_HEDGEHOG_OFF_STATE	0.0111445	0.036149	0.0424871	RPS27A/UBA52	2	Esophagus_Gastroesophageal_Junction	rs34238187
GOBP_STEROID_METABOLIC_PROCESS	GOBP_STEROID_METABOLIC_PROCESS	0.0112458	0.0363625	0.0427077	SPP1/NPC2/G6PD	3	Esophagus_Gastroesophageal_Junction	rs34238187
GOBP_DNA_GEOMETRIC_CHANGE	GOBP_DNA_GEOMETRIC_CHANGE	0.0113333	0.0365303	0.0429544	RPS27A/UBA52	2	Esophagus_Gastroesophageal_Junction	rs34238187
REACTOME_SIGNALING_BY_WNT	REACTOME_SIGNALING_BY_WNT	0.0114302	0.0367273	0.0432787	RPS27A/UBA52/CLTA	3	Esophagus_Gastroesophageal_Junction	rs34238187
REACTOME_DNA_REPAIR	REACTOME_DNA_REPAIR	0.0115231	0.0367965	0.0435022	RPS27A/UBA52/MGMT	3	Esophagus_Gastroesophageal_Junction	rs34238187
GOBP_REGULATION_OF_DNA_TEMPLATED_TRANSCRIPTION_IN_RESPONSE_TO_STRESS	GOBP_REGULATION_OF_DNA_TEMPLATED_TRANSCRIPTION_IN_RESPONSE_TO_STRESS	0.0115236	0.0367965	0.0435022	RPS27A/UBA52	2	Esophagus_Gastroesophageal_Junction	rs34238187
GOBP_REGULATION_OF_MRNA_METABOLIC_PROCESS	GOBP_REGULATION_OF_MRNA_METABOLIC_PROCESS	0.0117102	0.0372763	0.044051	CARHSP1/RPS27A/UBA52	3	Esophagus_Gastroesophageal_Junction	rs34238187
GOBP_PROTEIN_POLYUBIQUITINATION	GOBP_PROTEIN_POLYUBIQUITINATION	0.0119941	0.0380619	0.0449664	HECTD2/RPS27A/UBA52	3	Esophagus_Gastroesophageal_Junction	rs34238187
REACTOME_TRANSCRIPTIONAL_REGULATION_BY_RUNX2	REACTOME_TRANSCRIPTIONAL_REGULATION_BY_RUNX2	0.0124959	0.0395319	0.0465723	RPS27A/UBA52	2	Esophagus_Gastroesophageal_Junction	rs34238187
GOBP_NEGATIVE_REGULATION_OF_PROTEOLYSIS	GOBP_NEGATIVE_REGULATION_OF_PROTEOLYSIS	0.012672	0.0399656	0.0470362	PRDX5/RPL11/SERPING1	3	Esophagus_Gastroesophageal_Junction	rs34238187
GOBP_VIRAL_LIFE_CYCLE	GOBP_VIRAL_LIFE_CYCLE	0.0130691	0.0410915	0.0483298	RPS27A/UBA52/IFITM1	3	Esophagus_Gastroesophageal_Junction	rs34238187
REACTOME_CYTOPROTECTION_BY_HMOX1	REACTOME_CYTOPROTECTION_BY_HMOX1	0.0132988	0.0414324	0.0489414	RPS27A/UBA52	2	Esophagus_Gastroesophageal_Junction	rs34238187
REACTOME_REGULATION_OF_INSULIN_LIKE_GROWTH_FACTOR_IGF_TRANSPORT_AND_UPTAKE_BY_INSULIN_LIKE_GROWTH_FACTOR_BINDING_PROTEINS_IGFBPS	REACTOME_REGULATION_OF_INSULIN_LIKE_GROWTH_FACTOR_IGF_TRANSPORT_AND_UPTAKE_BY_INSULIN_LIKE_GROWTH_FACTOR_BINDING_PROTEINS_IGFBPS	0.0132988	0.0414324	0.0489414	PRKCSH/SPP1	2	Esophagus_Gastroesophageal_Junction	rs34238187
REACTOME_TCR_SIGNALING	REACTOME_TCR_SIGNALING	0.0132988	0.0414324	0.0489414	RPS27A/UBA52	2	Esophagus_Gastroesophageal_Junction	rs34238187
GOBP_NEGATIVE_REGULATION_OF_IMMUNE_EFFECTOR_PROCESS	GOBP_NEGATIVE_REGULATION_OF_IMMUNE_EFFECTOR_PROCESS	0.013503	0.041941	0.0496447	SERPING1/RPS19	2	Esophagus_Gastroesophageal_Junction	rs34238187
REACTOME_MHC_CLASS_II_ANTIGEN_PRESENTATION	REACTOME_MHC_CLASS_II_ANTIGEN_PRESENTATION	0.0137085	0.0423228	0.0502063	CTSD/CLTA	2	Esophagus_Gastroesophageal_Junction	rs34238187
REACTOME_OXIDATIVE_STRESS_INDUCED_SENESCENCE	REACTOME_OXIDATIVE_STRESS_INDUCED_SENESCENCE	0.0137085	0.0423228	0.0502063	RPS27A/UBA52	2	Esophagus_Gastroesophageal_Junction	rs34238187
GOBP_RESPONSE_TO_VIRUS	GOBP_RESPONSE_TO_VIRUS	0.0140928	0.0425785	0.0507348	NPC2/IFITM1/RPS15A	3	Esophagus_Gastroesophageal_Junction	rs34238187
REACTOME_DNA_REPLICATION	REACTOME_DNA_REPLICATION	0.0141236	0.0425785	0.0507497	RPS27A/UBA52	2	Esophagus_Gastroesophageal_Junction	rs34238187
GOBP_METHYLATION	GOBP_METHYLATION	0.0141976	0.042676	0.0509674	FBL/MGMT/METTL21EP	3	Esophagus_Gastroesophageal_Junction	rs34238187
GOBP_POST_TRANSLATIONAL_PROTEIN_MODIFICATION	GOBP_POST_TRANSLATIONAL_PROTEIN_MODIFICATION	0.0144085	0.0431834	0.0516273	RAB13/PRKCSH/SPP1	3	Esophagus_Gastroesophageal_Junction	rs34238187
GOBP_REGULATION_OF_CELLULAR_RESPONSE_TO_TRANSFORMING_GROWTH_FACTOR_BETA_STIMULUS	GOBP_REGULATION_OF_CELLULAR_RESPONSE_TO_TRANSFORMING_GROWTH_FACTOR_BETA_STIMULUS	0.0145441	0.0433364	0.0519664	RPS27A/UBA52	2	Esophagus_Gastroesophageal_Junction	rs34238187
REACTOME_RUNX1_REGULATES_TRANSCRIPTION_OF_GENES_INVOLVED_IN_DIFFERENTIATION_OF_HSCS	REACTOME_RUNX1_REGULATES_TRANSCRIPTION_OF_GENES_INVOLVED_IN_DIFFERENTIATION_OF_HSCS	0.0145441	0.0433364	0.0519664	RPS27A/UBA52	2	Esophagus_Gastroesophageal_Junction	rs34238187
REACTOME_HOST_INTERACTIONS_OF_HIV_FACTORS	REACTOME_HOST_INTERACTIONS_OF_HIV_FACTORS	0.0147564	0.0438415	0.0524295	RPS27A/UBA52	2	Esophagus_Gastroesophageal_Junction	rs34238187
GOBP_NEGATIVE_REGULATION_OF_TRANSMEMBRANE_RECEPTOR_PROTEIN_SERINE_THREONINE_KINASE_SIGNALING_PATHWAY	GOBP_NEGATIVE_REGULATION_OF_TRANSMEMBRANE_RECEPTOR_PROTEIN_SERINE_THREONINE_KINASE_SIGNALING_PATHWAY	0.0154013	0.0449753	0.0535215	RPS27A/UBA52	2	Esophagus_Gastroesophageal_Junction	rs34238187
GOBP_HUMORAL_IMMUNE_RESPONSE	GOBP_HUMORAL_IMMUNE_RESPONSE	0.0157118	0.0457517	0.054501	SERPING1/RPL39/RPS19	3	Esophagus_Gastroesophageal_Junction	rs34238187
REACTOME_FCERI_MEDIATED_NF_KB_ACTIVATION	REACTOME_FCERI_MEDIATED_NF_KB_ACTIVATION	0.0158379	0.0459882	0.0548384	RPS27A/UBA52	2	Esophagus_Gastroesophageal_Junction	rs34238187
GOMF_GROWTH_FACTOR_BINDING	GOMF_GROWTH_FACTOR_BINDING	0.0160582	0.0464961	0.0555001	S100A13/RPS19	2	Esophagus_Gastroesophageal_Junction	rs34238187
REACTOME_CLASS_I_MHC_MEDIATED_ANTIGEN_PROCESSING_PRESENTATION	REACTOME_CLASS_I_MHC_MEDIATED_ANTIGEN_PROCESSING_PRESENTATION	0.0161606	0.0466608	0.0557527	HECTD2/RPS27A/UBA52	3	Esophagus_Gastroesophageal_Junction	rs34238187
REACTOME_HOMOLOGY_DIRECTED_REPAIR	REACTOME_HOMOLOGY_DIRECTED_REPAIR	0.0162798	0.0468729	0.0560116	RPS27A/UBA52	2	Esophagus_Gastroesophageal_Junction	rs34238187
REACTOME_PTEN_REGULATION	REACTOME_PTEN_REGULATION	0.0165027	0.0469501	0.0566049	RPS27A/UBA52	2	Esophagus_Gastroesophageal_Junction	rs34238187
REACTOME_C_TYPE_LECTIN_RECEPTORS_CLRS	REACTOME_C_TYPE_LECTIN_RECEPTORS_CLRS	0.0167269	0.0469501	0.0566049	RPS27A/UBA52	2	Esophagus_Gastroesophageal_Junction	rs34238187
REACTOME_DEGRADATION_OF_THE_EXTRACELLULAR_MATRIX	REACTOME_DEGRADATION_OF_THE_EXTRACELLULAR_MATRIX	0.0167269	0.0469501	0.0566049	CTSD/SPP1	2	Esophagus_Gastroesophageal_Junction	rs34238187
REACTOME_INTERLEUKIN_1_FAMILY_SIGNALING	REACTOME_INTERLEUKIN_1_FAMILY_SIGNALING	0.0167269	0.0469501	0.0566049	RPS27A/UBA52	2	Esophagus_Gastroesophageal_Junction	rs34238187
REACTOME_DEATH_RECEPTOR_SIGNALLING	REACTOME_DEATH_RECEPTOR_SIGNALLING	0.0169524	0.0473467	0.0571377	RPS27A/UBA52	2	Esophagus_Gastroesophageal_Junction	rs34238187
GOBP_ANTIMICROBIAL_HUMORAL_RESPONSE	GOBP_ANTIMICROBIAL_HUMORAL_RESPONSE	0.0171792	0.0478498	0.0577487	RPL39/RPS19	2	Esophagus_Gastroesophageal_Junction	rs34238187
GOBP_NEGATIVE_REGULATION_OF_RESPONSE_TO_EXTERNAL_STIMULUS	GOBP_NEGATIVE_REGULATION_OF_RESPONSE_TO_EXTERNAL_STIMULUS	0.0181481	0.0497403	0.0596392	SPP1/SERPING1/RPS19	3	Esophagus_Gastroesophageal_Junction	rs34238187
GOBP_CELL_CELL_JUNCTION_ORGANIZATION	GOBP_CELL_CELL_JUNCTION_ORGANIZATION	1.22383e-07	0.00029323	1.77843e-05	TGFB1/F11R/ESAM/FLNA/CLDN5/LSR/CDH22/CDH3	8	Esophagus_Muscularis	rs34238187
GOBP_REGULATION_OF_CELL_DEVELOPMENT	GOBP_REGULATION_OF_CELL_DEVELOPMENT	9.4321e-07	0.000666397	0.000110778	TGFB1/HEY2/F11R/DNM1L/TNFRSF1B/SPINT1/MACF1/FLNA/SPP1/CLDN5	10	Esophagus_Muscularis	rs34238187
REACTOME_IMMUNOREGULATORY_INTERACTIONS_BETWEEN_A_LYMPHOID_AND_A_NON_LYMPHOID_CELL	REACTOME_IMMUNOREGULATORY_INTERACTIONS_BETWEEN_A_LYMPHOID_AND_A_NON_LYMPHOID_CELL	1.0383e-06	0.000666397	0.000120298	HCST/IFITM1/ICAM2/CD247/CD300A/HLA-C/CLEC2B	7	Esophagus_Muscularis	rs34238187
GOBP_POSITIVE_REGULATION_OF_CELL_DEVELOPMENT	GOBP_POSITIVE_REGULATION_OF_CELL_DEVELOPMENT	1.45537e-06	0.000666397	0.000129978	TGFB1/F11R/DNM1L/TNFRSF1B/SPINT1/MACF1/FLNA/CLDN5	8	Esophagus_Muscularis	rs34238187
REACTOME_INTERFERON_SIGNALING	REACTOME_INTERFERON_SIGNALING	1.55875e-06	0.000666397	0.000137775	ISG20/MAPK3/IFITM1/BST2/UBE2L6/FLNA/HLA-C	7	Esophagus_Muscularis	rs34238187
KEGG_CELL_ADHESION_MOLECULES_CAMS	KEGG_CELL_ADHESION_MOLECULES_CAMS	1.90377e-06	0.000666397	0.000163223	F11R/ICAM2/ESAM/CLDN5/CDH3/HLA-C	6	Esophagus_Muscularis	rs34238187
GOBP_MAINTENANCE_OF_BLOOD_BRAIN_BARRIER	GOBP_MAINTENANCE_OF_BLOOD_BRAIN_BARRIER	2.05229e-06	0.000666397	0.000174215	F11R/ESAM/CLDN5/LSR	4	Esophagus_Muscularis	rs34238187
KEGG_NATURAL_KILLER_CELL_MEDIATED_CYTOTOXICITY	KEGG_NATURAL_KILLER_CELL_MEDIATED_CYTOTOXICITY	2.26179e-06	0.000666397	0.000190116	HCST/MAPK3/ICAM2/CD247/CD48/HLA-C	6	Esophagus_Muscularis	rs34238187
GOBP_LEUKOCYTE_PROLIFERATION	GOBP_LEUKOCYTE_PROLIFERATION	2.50316e-06	0.000666397	0.000208362	RASAL3/MAPK3/LEF1/BST2/INPP5D/TNFRSF1B/IL15/CD300A	8	Esophagus_Muscularis	rs34238187
GOBP_NK_T_CELL_ACTIVATION	GOBP_NK_T_CELL_ACTIVATION	3.24919e-06	0.000778507	0.000253251	RASAL3/IL15/CD300A	3	Esophagus_Muscularis	rs34238187
GOBP_REGULATION_OF_LEUKOCYTE_PROLIFERATION	GOBP_REGULATION_OF_LEUKOCYTE_PROLIFERATION	4.83834e-06	0.00105388	0.000363881	RASAL3/MAPK3/BST2/INPP5D/TNFRSF1B/IL15/CD300A	7	Esophagus_Muscularis	rs34238187
GOBP_TISSUE_HOMEOSTASIS	GOBP_TISSUE_HOMEOSTASIS	7.9385e-06	0.00158505	0.000557887	F11R/INPP5D/ESAM/SPP1/CLDN5/LSR/CDH3	7	Esophagus_Muscularis	rs34238187
GOBP_LYMPH_NODE_DEVELOPMENT	GOBP_LYMPH_NODE_DEVELOPMENT	1.3231e-05	0.00243858	0.00082202	TGFB1/IL15/LTB	3	Esophagus_Muscularis	rs34238187
GOBP_LIPOPOLYSACCHARIDE_MEDIATED_SIGNALING_PATHWAY	GOBP_LIPOPOLYSACCHARIDE_MEDIATED_SIGNALING_PATHWAY	2.01863e-05	0.00345474	0.00086105	TGFB1/MAPK3/IRAK2/LY96	4	Esophagus_Muscularis	rs34238187
GOBP_CELL_CHEMOTAXIS	GOBP_CELL_CHEMOTAXIS	2.2211e-05	0.00352909	0.000932636	CCRL2/MAPK3/LEF1/CKLF/GBF1/DNM1L/GPSM3	7	Esophagus_Muscularis	rs34238187
GOBP_CELL_JUNCTION_ASSEMBLY	GOBP_CELL_JUNCTION_ASSEMBLY	2.35665e-05	0.00352909	0.000976097	F11R/SH3BP1/ESAM/MACF1/FLNA/CLDN5/LSR/CDH22	8	Esophagus_Muscularis	rs34238187
GOBP_PROTEIN_LOCALIZATION_TO_CELL_CELL_JUNCTION	GOBP_PROTEIN_LOCALIZATION_TO_CELL_CELL_JUNCTION	2.56724e-05	0.0036183	0.00105315	F11R/FLNA/LSR	3	Esophagus_Muscularis	rs34238187
GOBP_REGULATION_OF_T_CELL_ACTIVATION	GOBP_REGULATION_OF_T_CELL_ACTIVATION	3.45929e-05	0.0046047	0.00134203	RASAL3/LEF1/PRDM1/TNFRSF1B/IL15/CD300A/TNFRSF18	7	Esophagus_Muscularis	rs34238187
GOBP_PLACENTA_DEVELOPMENT	GOBP_PLACENTA_DEVELOPMENT	3.67791e-05	0.00463804	0.00140773	HEY2/MAPK3/LEF1/SPINT1/SPP1	5	Esophagus_Muscularis	rs34238187
GOBP_ANATOMICAL_STRUCTURE_HOMEOSTASIS	GOBP_ANATOMICAL_STRUCTURE_HOMEOSTASIS	4.51577e-05	0.00540989	0.00166883	MAPK3/F11R/INPP5D/ESAM/SPP1/CLDN5/LSR/CDH3	8	Esophagus_Muscularis	rs34238187
REACTOME_INTERFERON_ALPHA_BETA_SIGNALING	REACTOME_INTERFERON_ALPHA_BETA_SIGNALING	5.01766e-05	0.00551032	0.00179999	ISG20/IFITM1/BST2/HLA-C	4	Esophagus_Muscularis	rs34238187
GOBP_REGULATION_OF_NEUROGENESIS	GOBP_REGULATION_OF_NEUROGENESIS	5.12313e-05	0.00551032	0.00183017	TGFB1/HEY2/DNM1L/TNFRSF1B/SPINT1/MACF1/SPP1	7	Esophagus_Muscularis	rs34238187
GOBP_CELL_CELL_JUNCTION_ASSEMBLY	GOBP_CELL_CELL_JUNCTION_ASSEMBLY	5.51952e-05	0.00551032	0.00193945	F11R/ESAM/CLDN5/LSR/CDH22	5	Esophagus_Muscularis	rs34238187
GOBP_GRANULOCYTE_MIGRATION	GOBP_GRANULOCYTE_MIGRATION	5.51952e-05	0.00551032	0.00193945	MAPK3/CKLF/GBF1/DNM1L/CD300A	5	Esophagus_Muscularis	rs34238187
GOBP_ALPHA_BETA_T_CELL_ACTIVATION	GOBP_ALPHA_BETA_T_CELL_ACTIVATION	5.88529e-05	0.00563917	0.0020103	RASAL3/LEF1/PRDM1/IL15/CD300A	5	Esophagus_Muscularis	rs34238187
GOBP_RESPONSE_TO_VIRUS	GOBP_RESPONSE_TO_VIRUS	6.1193e-05	0.00563917	0.00208194	ISG20/HMGA1/IFITM1/GBF1/BST2/IL15/FLNA	7	Esophagus_Muscularis	rs34238187
GOBP_PLATELET_ACTIVATION	GOBP_PLATELET_ACTIVATION	7.5391e-05	0.00665339	0.00252492	MAPK3/ADRA2A/F11R/FLNA/CSRP1	5	Esophagus_Muscularis	rs34238187
GOBP_PEPTIDYL_TYROSINE_MODIFICATION	GOBP_PEPTIDYL_TYROSINE_MODIFICATION	7.77525e-05	0.00665339	0.00259387	TGFB1/MAPK3/ADRA2A/MATK/IL15/CD300A/TNFRSF18	7	Esophagus_Muscularis	rs34238187
GOBP_NEGATIVE_REGULATION_OF_LOCOMOTION	GOBP_NEGATIVE_REGULATION_OF_LOCOMOTION	8.44858e-05	0.00698028	0.00278598	TGFB1/EPPK1/IFITM1/BST2/CLDN5/CD300A/MCTP1	7	Esophagus_Muscularis	rs34238187
KEGG_CYTOKINE_CYTOKINE_RECEPTOR_INTERACTION	KEGG_CYTOKINE_CYTOKINE_RECEPTOR_INTERACTION	9.42253e-05	0.00736234	0.00303706	TGFB1/IL2RG/TNFRSF1B/IL15/TNFRSF18/LTB	6	Esophagus_Muscularis	rs34238187
GOBP_REGULATION_OF_TISSUE_REMODELING	GOBP_REGULATION_OF_TISSUE_REMODELING	9.52557e-05	0.00736234	0.00303736	TGFB1/INPP5D/IL15/SPP1	4	Esophagus_Muscularis	rs34238187
GOBP_REGULATION_OF_ACTIN_FILAMENT_BASED_PROCESS	GOBP_REGULATION_OF_ACTIN_FILAMENT_BASED_PROCESS	0.000102604	0.00768245	0.00318729	F11R/BST2/TMSB10/SH3BP1/ESAM/FLNA/GMFG	7	Esophagus_Muscularis	rs34238187
GOBP_REGULATION_OF_ACTIN_FILAMENT_ORGANIZATION	GOBP_REGULATION_OF_ACTIN_FILAMENT_ORGANIZATION	0.00011085	0.00791919	0.00339425	F11R/TMSB10/SH3BP1/ESAM/FLNA/GMFG	6	Esophagus_Muscularis	rs34238187
GOBP_MYD88_DEPENDENT_TOLL_LIKE_RECEPTOR_SIGNALING_PATHWAY	GOBP_MYD88_DEPENDENT_TOLL_LIKE_RECEPTOR_SIGNALING_PATHWAY	0.000122856	0.00791919	0.003722	IRAK2/LY96/CD300A	3	Esophagus_Muscularis	rs34238187
REACTOME_CELL_JUNCTION_ORGANIZATION	REACTOME_CELL_JUNCTION_ORGANIZATION	0.000123766	0.00791919	0.00373638	F11R/FLNA/CLDN5/CDH3	4	Esophagus_Muscularis	rs34238187
GOBP_REGULATION_OF_LEUKOCYTE_DIFFERENTIATION	GOBP_REGULATION_OF_LEUKOCYTE_DIFFERENTIATION	0.000124783	0.00791919	0.00373897	TGFB1/LEF1/PRDM1/INPP5D/IL15/TNFRSF18	6	Esophagus_Muscularis	rs34238187
GOBP_REGULATION_OF_LYMPHOCYTE_DIFFERENTIATION	GOBP_REGULATION_OF_LYMPHOCYTE_DIFFERENTIATION	0.000125597	0.00791919	0.00373897	LEF1/PRDM1/INPP5D/IL15/TNFRSF18	5	Esophagus_Muscularis	rs34238187
GOBP_TISSUE_REMODELING	GOBP_TISSUE_REMODELING	0.000125597	0.00791919	0.00373897	TGFB1/INPP5D/IL15/FLNA/SPP1	5	Esophagus_Muscularis	rs34238187
GOBP_GLIOGENESIS	GOBP_GLIOGENESIS	0.00013482	0.00828277	0.00394506	TGFB1/MAPK3/LEF1/TNFRSF1B/SPINT1/PAFAH1B1	6	Esophagus_Muscularis	rs34238187
KEGG_ENDOCYTOSIS	KEGG_ENDOCYTOSIS	0.00014702	0.00866383	0.00420167	IL2RG/DNM1L/ACAP1/RAB11FIP4/HLA-C	5	Esophagus_Muscularis	rs34238187
GOMF_G_PROTEIN_COUPLED_RECEPTOR_BINDING	GOMF_G_PROTEIN_COUPLED_RECEPTOR_BINDING	0.000148254	0.00866383	0.00422287	CCRL2/ADRA2A/CKLF/PROK2/CCDC88C/FLNA	6	Esophagus_Muscularis	rs34238187
GOBP_REGULATION_OF_ACTIN_CYTOSKELETON_REORGANIZATION	GOBP_REGULATION_OF_ACTIN_CYTOSKELETON_REORGANIZATION	0.000157408	0.00897973	0.00435519	F11R/ESAM/GMFG	3	Esophagus_Muscularis	rs34238187
GOBP_REGULATION_OF_NERVOUS_SYSTEM_DEVELOPMENT	GOBP_REGULATION_OF_NERVOUS_SYSTEM_DEVELOPMENT	0.000169269	0.00943185	0.00435519	TGFB1/HEY2/DNM1L/TNFRSF1B/SPINT1/MACF1/SPP1	7	Esophagus_Muscularis	rs34238187
GOBP_RESPONSE_TO_TYPE_I_INTERFERON	GOBP_RESPONSE_TO_TYPE_I_INTERFERON	0.000177465	0.00966377	0.00435519	ISG20/IFITM1/BST2/HLA-C	4	Esophagus_Muscularis	rs34238187
GOBP_ACTIN_CYTOSKELETON_REORGANIZATION	GOBP_ACTIN_CYTOSKELETON_REORGANIZATION	0.000191366	0.00998359	0.00435519	F11R/ESAM/FLNA/GMFG	4	Esophagus_Muscularis	rs34238187
GOBP_CELLULAR_RESPONSE_TO_EXTERNAL_STIMULUS	GOBP_CELLULAR_RESPONSE_TO_EXTERNAL_STIMULUS	0.000195022	0.00998359	0.00435519	NUAK2/MAPK3/F11R/DNM1L/IL15/GOT1	6	Esophagus_Muscularis	rs34238187
GOBP_SEMI_LUNAR_VALVE_DEVELOPMENT	GOBP_SEMI_LUNAR_VALVE_DEVELOPMENT	0.00019772	0.00998359	0.00435519	TGFB1/HEY2/TNFRSF1B	3	Esophagus_Muscularis	rs34238187
REACTOME_CELL_SURFACE_INTERACTIONS_AT_THE_VASCULAR_WALL	REACTOME_CELL_SURFACE_INTERACTIONS_AT_THE_VASCULAR_WALL	0.00020296	0.00998359	0.00435519	TGFB1/F11R/INPP5D/ESAM/CD48	5	Esophagus_Muscularis	rs34238187
GOBP_REGULATION_OF_MAP_KINASE_ACTIVITY	GOBP_REGULATION_OF_MAP_KINASE_ACTIVITY	0.000209273	0.00998359	0.00435519	TGFB1/MAPK3/ADRA2A/PROK2/IRAK2/CD300A	6	Esophagus_Muscularis	rs34238187
GOBP_REGULATION_OF_CELL_CELL_ADHESION	GOBP_REGULATION_OF_CELL_CELL_ADHESION	0.000209403	0.00998359	0.00435519	TGFB1/RASAL3/LEF1/FXYD5/F11R/IL15/CD300A	7	Esophagus_Muscularis	rs34238187
GOBP_POSITIVE_REGULATION_OF_GLIAL_CELL_DIFFERENTIATION	GOBP_POSITIVE_REGULATION_OF_GLIAL_CELL_DIFFERENTIATION	0.000212506	0.00998359	0.00435519	TGFB1/TNFRSF1B/SPINT1	3	Esophagus_Muscularis	rs34238187
GOBP_FACE_DEVELOPMENT	GOBP_FACE_DEVELOPMENT	0.000244184	0.0108173	0.00452173	MAPK3/LEF1/CLDN5	3	Esophagus_Muscularis	rs34238187
GOBP_LABYRINTHINE_LAYER_DEVELOPMENT	GOBP_LABYRINTHINE_LAYER_DEVELOPMENT	0.000244184	0.0108173	0.00452173	HEY2/LEF1/SPINT1	3	Esophagus_Muscularis	rs34238187
REACTOME_INTERLEUKIN_2_FAMILY_SIGNALING	REACTOME_INTERLEUKIN_2_FAMILY_SIGNALING	0.000244184	0.0108173	0.00452173	IL2RG/INPP5D/IL15	3	Esophagus_Muscularis	rs34238187
GOBP_B_CELL_ACTIVATION	GOBP_B_CELL_ACTIVATION	0.000257012	0.0108173	0.00472863	TGFB1/LEF1/BST2/INPP5D/LAT2/CD300A	6	Esophagus_Muscularis	rs34238187
GOBP_RESPONSE_TO_TUMOR_NECROSIS_FACTOR	GOBP_RESPONSE_TO_TUMOR_NECROSIS_FACTOR	0.000257012	0.0108173	0.00472863	MAPK3/CASP4/SLC2A4/TNFRSF1B/TNFRSF18/LTB	6	Esophagus_Muscularis	rs34238187
GOBP_MUSCLE_SYSTEM_PROCESS	GOBP_MUSCLE_SYSTEM_PROCESS	0.000260348	0.0108173	0.00477974	HEY2/ADRA2A/PROK2/TNFRSF1B/IL15/FLNA/SLMAP	7	Esophagus_Muscularis	rs34238187
GOBP_REGULATION_OF_LEUKOCYTE_MIGRATION	GOBP_REGULATION_OF_LEUKOCYTE_MIGRATION	0.000261854	0.0108173	0.00479712	MAPK3/DNM1L/CD300A/TNFRSF18/GPSM3	5	Esophagus_Muscularis	rs34238187
GOBP_CELLULAR_RESPONSE_TO_MOLECULE_OF_BACTERIAL_ORIGIN	GOBP_CELLULAR_RESPONSE_TO_MOLECULE_OF_BACTERIAL_ORIGIN	0.000286205	0.0116228	0.00517686	TGFB1/MAPK3/TNFRSF1B/IRAK2/LY96	5	Esophagus_Muscularis	rs34238187
GOBP_GLIAL_CELL_DIFFERENTIATION	GOBP_GLIAL_CELL_DIFFERENTIATION	0.000292553	0.0116641	0.00526944	TGFB1/MAPK3/LEF1/TNFRSF1B/SPINT1	5	Esophagus_Muscularis	rs34238187
REACTOME_SIGNALING_BY_INTERLEUKINS	REACTOME_SIGNALING_BY_INTERLEUKINS	0.000296957	0.0116641	0.00531929	TGFB1/IL2RG/MAPK3/INPP5D/TNFRSF1B/IRAK2/IL15	7	Esophagus_Muscularis	rs34238187
GOMF_CADHERIN_BINDING	GOMF_CADHERIN_BINDING	0.000317991	0.0122265	0.00567991	FXYD5/F11R/MACF1/FLNA/CDH22/CDH3	6	Esophagus_Muscularis	rs34238187
GOBP_REGULATION_OF_NATURAL_KILLER_CELL_DIFFERENTIATION	GOBP_REGULATION_OF_NATURAL_KILLER_CELL_DIFFERENTIATION	0.000329982	0.0122265	0.00583714	PRDM1/IL15	2	Esophagus_Muscularis	rs34238187
GOMF_TUMOR_NECROSIS_FACTOR_ACTIVATED_RECEPTOR_ACTIVITY	GOMF_TUMOR_NECROSIS_FACTOR_ACTIVATED_RECEPTOR_ACTIVITY	0.000329982	0.0122265	0.00583714	TNFRSF1B/TNFRSF18	2	Esophagus_Muscularis	rs34238187
GOBP_MYELOID_LEUKOCYTE_MIGRATION	GOBP_MYELOID_LEUKOCYTE_MIGRATION	0.000340027	0.0122265	0.00587758	MAPK3/CKLF/GBF1/DNM1L/CD300A	5	Esophagus_Muscularis	rs34238187
GOBP_POSITIVE_REGULATION_OF_NEUROGENESIS	GOBP_POSITIVE_REGULATION_OF_NEUROGENESIS	0.000340027	0.0122265	0.00587758	TGFB1/DNM1L/TNFRSF1B/SPINT1/MACF1	5	Esophagus_Muscularis	rs34238187
GOBP_T_CELL_ACTIVATION	GOBP_T_CELL_ACTIVATION	0.000341894	0.0122265	0.00588612	RASAL3/LEF1/PRDM1/TNFRSF1B/IL15/CD300A/TNFRSF18	7	Esophagus_Muscularis	rs34238187
GOBP_RAS_PROTEIN_SIGNAL_TRANSDUCTION	GOBP_RAS_PROTEIN_SIGNAL_TRANSDUCTION	0.000349706	0.012322	0.00600855	RASAL3/ADRA2A/F11R/GBF1/SH3BP1/ZNF304	6	Esophagus_Muscularis	rs34238187
GOBP_GRANULOCYTE_CHEMOTAXIS	GOBP_GRANULOCYTE_CHEMOTAXIS	0.000376804	0.0130844	0.00642266	MAPK3/CKLF/GBF1/DNM1L	4	Esophagus_Muscularis	rs34238187
GOBP_LEUKOCYTE_CHEMOTAXIS	GOBP_LEUKOCYTE_CHEMOTAXIS	0.000401183	0.0133973	0.00672842	MAPK3/CKLF/GBF1/DNM1L/GPSM3	5	Esophagus_Muscularis	rs34238187
GOBP_NEGATIVE_REGULATION_OF_MUSCLE_ORGAN_DEVELOPMENT	GOBP_NEGATIVE_REGULATION_OF_MUSCLE_ORGAN_DEVELOPMENT	0.00040259	0.0133973	0.00672842	TGFB1/LEF1	2	Esophagus_Muscularis	rs34238187
GOBP_NEGATIVE_REGULATION_OF_MUSCLE_TISSUE_DEVELOPMENT	GOBP_NEGATIVE_REGULATION_OF_MUSCLE_TISSUE_DEVELOPMENT	0.00040259	0.0133973	0.00672842	TGFB1/LEF1	2	Esophagus_Muscularis	rs34238187
GOBP_REGULATION_OF_ANATOMICAL_STRUCTURE_SIZE	GOBP_REGULATION_OF_ANATOMICAL_STRUCTURE_SIZE	0.000432255	0.0140909	0.0071822	ADRA2A/TMSB10/SH3BP1/ESAM/MACF1/SPP1/GMFG	7	Esophagus_Muscularis	rs34238187
GOBP_POSITIVE_REGULATION_OF_MAP_KINASE_ACTIVITY	GOBP_POSITIVE_REGULATION_OF_MAP_KINASE_ACTIVITY	0.00044341	0.0140909	0.0073391	TGFB1/MAPK3/ADRA2A/PROK2/IRAK2	5	Esophagus_Muscularis	rs34238187
GOBP_NEGATIVE_REGULATION_OF_VIRAL_GENOME_REPLICATION	GOBP_NEGATIVE_REGULATION_OF_VIRAL_GENOME_REPLICATION	0.000448309	0.0140909	0.00740589	ISG20/IFITM1/BST2	3	Esophagus_Muscularis	rs34238187
GOBP_MESENCHYMAL_CELL_DIFFERENTIATION	GOBP_MESENCHYMAL_CELL_DIFFERENTIATION	0.000452242	0.0140909	0.00742793	TGFB1/HEY2/MAPK3/LEF1/FLNA	5	Esophagus_Muscularis	rs34238187
REACTOME_CELL_CELL_COMMUNICATION	REACTOME_CELL_CELL_COMMUNICATION	0.000464578	0.0140909	0.00760142	F11R/FLNA/CLDN5/CDH3	4	Esophagus_Muscularis	rs34238187
GOBP_REGULATION_OF_BINDING	GOBP_REGULATION_OF_BINDING	0.000466758	0.0140909	0.00762254	TGFB1/HEY2/MAPK3/LEF1/CLDN5/ZNF304	6	Esophagus_Muscularis	rs34238187
GOBP_CELLULAR_RESPONSE_TO_BIOTIC_STIMULUS	GOBP_CELLULAR_RESPONSE_TO_BIOTIC_STIMULUS	0.000470304	0.0140909	0.00766585	TGFB1/MAPK3/TNFRSF1B/IRAK2/LY96	5	Esophagus_Muscularis	rs34238187
GOBP_TRANSMEMBRANE_RECEPTOR_PROTEIN_SERINE_THREONINE_KINASE_SIGNALING_PATHWAY	GOBP_TRANSMEMBRANE_RECEPTOR_PROTEIN_SERINE_THREONINE_KINASE_SIGNALING_PATHWAY	0.000473671	0.0140909	0.00769149	TGFB1/MAPK3/LEF1/F11R/GOT1/CLDN5	6	Esophagus_Muscularis	rs34238187
GOMF_CYTOKINE_ACTIVITY	GOMF_CYTOKINE_ACTIVITY	0.000479536	0.0140909	0.00777201	TGFB1/CKLF/IL15/SPP1/LTB	5	Esophagus_Muscularis	rs34238187
GOMF_DEATH_RECEPTOR_ACTIVITY	GOMF_DEATH_RECEPTOR_ACTIVITY	0.000482243	0.0140909	0.00778644	TNFRSF1B/TNFRSF18	2	Esophagus_Muscularis	rs34238187
GOBP_POSITIVE_REGULATION_OF_LEUKOCYTE_MIGRATION	GOBP_POSITIVE_REGULATION_OF_LEUKOCYTE_MIGRATION	0.000506317	0.0146161	0.00814447	MAPK3/DNM1L/TNFRSF18/GPSM3	4	Esophagus_Muscularis	rs34238187
GOBP_REGULATION_OF_WNT_SIGNALING_PATHWAY	GOBP_REGULATION_OF_WNT_SIGNALING_PATHWAY	0.000524327	0.0149558	0.00840264	TGFB1/LEF1/TRABD2A/MACF1/CCDC88C/CDH3	6	Esophagus_Muscularis	rs34238187
GOBP_NEGATIVE_REGULATION_OF_CYTOKINE_PRODUCTION	GOBP_NEGATIVE_REGULATION_OF_CYTOKINE_PRODUCTION	0.000539547	0.0152089	0.00863043	TGFB1/LEF1/BST2/INPP5D/UBE2L6/CDH3	6	Esophagus_Muscularis	rs34238187
GOBP_REGULATION_OF_CELLULAR_COMPONENT_SIZE	GOBP_REGULATION_OF_CELLULAR_COMPONENT_SIZE	0.00056302	0.0154897	0.00895577	TMSB10/SH3BP1/ESAM/MACF1/SPP1/GMFG	6	Esophagus_Muscularis	rs34238187
GOBP_REGULATION_OF_SUPRAMOLECULAR_FIBER_ORGANIZATION	GOBP_REGULATION_OF_SUPRAMOLECULAR_FIBER_ORGANIZATION	0.00056302	0.0154897	0.00895577	F11R/TMSB10/SH3BP1/ESAM/FLNA/GMFG	6	Esophagus_Muscularis	rs34238187
GOBP_NEGATIVE_REGULATION_OF_EXTRACELLULAR_MATRIX_ORGANIZATION	GOBP_NEGATIVE_REGULATION_OF_EXTRACELLULAR_MATRIX_ORGANIZATION	0.000568904	0.0154897	0.0090159	TGFB1/TNFRSF1B	2	Esophagus_Muscularis	rs34238187
GOBP_NEURAL_PRECURSOR_CELL_PROLIFERATION	GOBP_NEURAL_PRECURSOR_CELL_PROLIFERATION	0.00058171	0.0156604	0.00916875	LEF1/SPINT1/FLNA/PAFAH1B1	4	Esophagus_Muscularis	rs34238187
GOBP_PHAGOCYTOSIS	GOBP_PHAGOCYTOSIS	0.000595545	0.0157371	0.00935115	IL2RG/MAPK3/CD247/SH3BP1/IL15/CD300A	6	Esophagus_Muscularis	rs34238187
GOBP_POSITIVE_REGULATION_OF_CHEMOTAXIS	GOBP_POSITIVE_REGULATION_OF_CHEMOTAXIS	0.000597693	0.0157371	0.00935115	TGFB1/MAPK3/DNM1L/GPSM3	4	Esophagus_Muscularis	rs34238187
GOBP_HEART_VALVE_DEVELOPMENT	GOBP_HEART_VALVE_DEVELOPMENT	0.000641495	0.0165271	0.00990987	TGFB1/HEY2/TNFRSF1B	3	Esophagus_Muscularis	rs34238187
GOBP_MEMBRANE_PROTEIN_PROTEOLYSIS	GOBP_MEMBRANE_PROTEIN_PROTEOLYSIS	0.000641495	0.0165271	0.00990987	TGFB1/ADRA2A/TNFRSF1B	3	Esophagus_Muscularis	rs34238187
GOBP_RESPONSE_TO_INTERLEUKIN_15	GOBP_RESPONSE_TO_INTERLEUKIN_15	0.000662534	0.0166182	0.0100715	IL2RG/IL15	2	Esophagus_Muscularis	rs34238187
REACTOME_INTERLEUKIN_15_SIGNALING	REACTOME_INTERLEUKIN_15_SIGNALING	0.000662534	0.0166182	0.0100715	IL2RG/IL15	2	Esophagus_Muscularis	rs34238187
GOBP_PLATELET_AGGREGATION	GOBP_PLATELET_AGGREGATION	0.000672775	0.0166182	0.0101196	F11R/FLNA/CSRP1	3	Esophagus_Muscularis	rs34238187
KEGG_COLORECTAL_CANCER	KEGG_COLORECTAL_CANCER	0.000672775	0.0166182	0.0101196	TGFB1/MAPK3/LEF1	3	Esophagus_Muscularis	rs34238187
GOBP_POSITIVE_REGULATION_OF_GLIOGENESIS	GOBP_POSITIVE_REGULATION_OF_GLIOGENESIS	0.000705012	0.0172368	0.0104577	TGFB1/TNFRSF1B/SPINT1	3	Esophagus_Muscularis	rs34238187
GOBP_REGULATION_OF_T_CELL_DIFFERENTIATION	GOBP_REGULATION_OF_T_CELL_DIFFERENTIATION	0.000718423	0.0173873	0.0106199	LEF1/PRDM1/IL15/TNFRSF18	4	Esophagus_Muscularis	rs34238187
GOBP_POSITIVE_REGULATION_OF_LEUKOCYTE_PROLIFERATION	GOBP_POSITIVE_REGULATION_OF_LEUKOCYTE_PROLIFERATION	0.000755863	0.0174592	0.0110703	RASAL3/MAPK3/BST2/IL15	4	Esophagus_Muscularis	rs34238187
GOBP_CELL_MIGRATION_IN_HINDBRAIN	GOBP_CELL_MIGRATION_IN_HINDBRAIN	0.000763094	0.0174592	0.0110703	LEF1/FLNA	2	Esophagus_Muscularis	rs34238187
GOBP_ORGANELLE_INHERITANCE	GOBP_ORGANELLE_INHERITANCE	0.000763094	0.0174592	0.0110703	MAPK3/GBF1	2	Esophagus_Muscularis	rs34238187
GOBP_POSITIVE_REGULATION_OF_MEMBRANE_PROTEIN_ECTODOMAIN_PROTEOLYSIS	GOBP_POSITIVE_REGULATION_OF_MEMBRANE_PROTEIN_ECTODOMAIN_PROTEOLYSIS	0.000763094	0.0174592	0.0110703	ADRA2A/TNFRSF1B	2	Esophagus_Muscularis	rs34238187
GOBP_REGULATION_OF_GRANULOCYTE_DIFFERENTIATION	GOBP_REGULATION_OF_GRANULOCYTE_DIFFERENTIATION	0.000763094	0.0174592	0.0110703	LEF1/INPP5D	2	Esophagus_Muscularis	rs34238187
GOBP_DEFENSE_RESPONSE_TO_VIRUS	GOBP_DEFENSE_RESPONSE_TO_VIRUS	0.000771127	0.0174592	0.0111487	ISG20/IFITM1/BST2/IL15/FLNA	5	Esophagus_Muscularis	rs34238187
REACTOME_CELL_CELL_JUNCTION_ORGANIZATION	REACTOME_CELL_CELL_JUNCTION_ORGANIZATION	0.000772401	0.0174592	0.0111487	F11R/CLDN5/CDH3	3	Esophagus_Muscularis	rs34238187
GOBP_REGULATION_OF_PEPTIDYL_TYROSINE_PHOSPHORYLATION	GOBP_REGULATION_OF_PEPTIDYL_TYROSINE_PHOSPHORYLATION	0.000798035	0.0177787	0.01148	TGFB1/ADRA2A/IL15/CD300A/TNFRSF18	5	Esophagus_Muscularis	rs34238187
GOBP_EXTERNAL_ENCAPSULATING_STRUCTURE_ORGANIZATION	GOBP_EXTERNAL_ENCAPSULATING_STRUCTURE_ORGANIZATION	0.000801375	0.0177787	0.0114895	TGFB1/F11R/ICAM2/TNFRSF1B/SPINT1/SPP1	6	Esophagus_Muscularis	rs34238187
GOBP_POSITIVE_REGULATION_OF_NERVOUS_SYSTEM_DEVELOPMENT	GOBP_POSITIVE_REGULATION_OF_NERVOUS_SYSTEM_DEVELOPMENT	0.000811749	0.0178436	0.0115995	TGFB1/DNM1L/TNFRSF1B/SPINT1/MACF1	5	Esophagus_Muscularis	rs34238187
GOBP_PROTEIN_LOCALIZATION_TO_CELL_SURFACE	GOBP_PROTEIN_LOCALIZATION_TO_CELL_SURFACE	0.000843754	0.0181961	0.0118982	GBF1/CD247/FLNA	3	Esophagus_Muscularis	rs34238187
KEGG_ADIPOCYTOKINE_SIGNALING_PATHWAY	KEGG_ADIPOCYTOKINE_SIGNALING_PATHWAY	0.000843754	0.0181961	0.0118982	SLC2A4/TNFRSF1B/CPT1C	3	Esophagus_Muscularis	rs34238187
GOBP_EPITHELIAL_TO_MESENCHYMAL_TRANSITION	GOBP_EPITHELIAL_TO_MESENCHYMAL_TRANSITION	0.000855467	0.0181961	0.0120238	TGFB1/HEY2/LEF1/FLNA	4	Esophagus_Muscularis	rs34238187
REACTOME_TGF_BETA_RECEPTOR_SIGNALING_IN_EMT_EPITHELIAL_TO_MESENCHYMAL_TRANSITION	REACTOME_TGF_BETA_RECEPTOR_SIGNALING_IN_EMT_EPITHELIAL_TO_MESENCHYMAL_TRANSITION	0.000870548	0.0181961	0.0121166	TGFB1/F11R	2	Esophagus_Muscularis	rs34238187
REACTOME_TRAF6_MEDIATED_INDUCTION_OF_TAK1_COMPLEX_WITHIN_TLR4_COMPLEX	REACTOME_TRAF6_MEDIATED_INDUCTION_OF_TAK1_COMPLEX_WITHIN_TLR4_COMPLEX	0.000870548	0.0181961	0.0121166	IRAK2/LY96	2	Esophagus_Muscularis	rs34238187
GOBP_POSITIVE_REGULATION_OF_HEMOPOIESIS	GOBP_POSITIVE_REGULATION_OF_HEMOPOIESIS	0.000876444	0.0181961	0.0121789	TGFB1/LEF1/INPP5D/IL15	4	Esophagus_Muscularis	rs34238187
GOBP_REGULATION_OF_GLIAL_CELL_DIFFERENTIATION	GOBP_REGULATION_OF_GLIAL_CELL_DIFFERENTIATION	0.000880945	0.0181961	0.0122019	TGFB1/TNFRSF1B/SPINT1	3	Esophagus_Muscularis	rs34238187
GOMF_CYTOKINE_RECEPTOR_BINDING	GOMF_CYTOKINE_RECEPTOR_BINDING	0.00089776	0.0183849	0.0123751	TGFB1/CCRL2/CKLF/IL15/LTB	5	Esophagus_Muscularis	rs34238187
GOBP_REPRODUCTIVE_SYSTEM_DEVELOPMENT	GOBP_REPRODUCTIVE_SYSTEM_DEVELOPMENT	0.000934691	0.018833	0.0128015	HEY2/MAPK3/LEF1/SPINT1/FLNA/SPP1	6	Esophagus_Muscularis	rs34238187
GOBP_POSITIVE_REGULATION_OF_GTPASE_ACTIVITY	GOBP_POSITIVE_REGULATION_OF_GTPASE_ACTIVITY	0.000946526	0.018833	0.0129223	RASAL3/F11R/DNM1L/SH3BP1/TBC1D30/ACAP1	6	Esophagus_Muscularis	rs34238187
GOBP_CELL_CELL_ADHESION_VIA_PLASMA_MEMBRANE_ADHESION_MOLECULES	GOBP_CELL_CELL_ADHESION_VIA_PLASMA_MEMBRANE_ADHESION_MOLECULES	0.000958756	0.018833	0.0130568	FXYD5/ESAM/CLDN5/CDH22/CDH3	5	Esophagus_Muscularis	rs34238187
GOBP_NEGATIVE_REGULATION_OF_B_CELL_PROLIFERATION	GOBP_NEGATIVE_REGULATION_OF_B_CELL_PROLIFERATION	0.000984857	0.018833	0.0132469	INPP5D/CD300A	2	Esophagus_Muscularis	rs34238187
GOBP_REGULATION_OF_ENDOTHELIAL_CELL_DEVELOPMENT	GOBP_REGULATION_OF_ENDOTHELIAL_CELL_DEVELOPMENT	0.000984857	0.018833	0.0132469	F11R/CLDN5	2	Esophagus_Muscularis	rs34238187
GOBP_TRACHEA_DEVELOPMENT	GOBP_TRACHEA_DEVELOPMENT	0.000984857	0.018833	0.0132469	MAPK3/LEF1	2	Esophagus_Muscularis	rs34238187
GOBP_NEGATIVE_REGULATION_OF_BINDING	GOBP_NEGATIVE_REGULATION_OF_BINDING	0.0009868	0.018833	0.0132469	HEY2/MAPK3/LEF1/ZNF304	4	Esophagus_Muscularis	rs34238187
GOBP_PROTEIN_LOCALIZATION_TO_PLASMA_MEMBRANE	GOBP_PROTEIN_LOCALIZATION_TO_PLASMA_MEMBRANE	0.000990384	0.018833	0.0132469	TGFB1/F11R/MACF1/FLNA/SLMAP	5	Esophagus_Muscularis	rs34238187
GOMF_GTPASE_ACTIVATOR_ACTIVITY	GOMF_GTPASE_ACTIVATOR_ACTIVITY	0.000990384	0.018833	0.0132469	RASAL3/DNM1L/SH3BP1/TBC1D30/ACAP1	5	Esophagus_Muscularis	rs34238187
GOBP_REGULATION_OF_HEMOPOIESIS	GOBP_REGULATION_OF_HEMOPOIESIS	0.00101998	0.0192431	0.0135581	TGFB1/LEF1/PRDM1/INPP5D/IL15/TNFRSF18	6	Esophagus_Muscularis	rs34238187
GOBP_NATURAL_KILLER_CELL_DIFFERENTIATION	GOBP_NATURAL_KILLER_CELL_DIFFERENTIATION	0.00110598	0.0202511	0.0143615	PRDM1/IL15	2	Esophagus_Muscularis	rs34238187
GOBP_POSITIVE_REGULATION_OF_INTERLEUKIN_17_PRODUCTION	GOBP_POSITIVE_REGULATION_OF_INTERLEUKIN_17_PRODUCTION	0.00110598	0.0202511	0.0143615	TGFB1/IL15	2	Esophagus_Muscularis	rs34238187
GOBP_REGULATION_OF_RESPONSE_TO_WOUNDING	GOBP_REGULATION_OF_RESPONSE_TO_WOUNDING	0.00110658	0.0202511	0.0143615	EPPK1/ADRA2A/FLNA/SPP1	4	Esophagus_Muscularis	rs34238187
GOBP_I_KAPPAB_KINASE_NF_KAPPAB_SIGNALING	GOBP_I_KAPPAB_KINASE_NF_KAPPAB_SIGNALING	0.00110722	0.0202511	0.0143615	BST2/IRAK2/APOL3/LY96/FLNA	5	Esophagus_Muscularis	rs34238187
GOBP_CELLULAR_RESPONSE_TO_MECHANICAL_STIMULUS	GOBP_CELLULAR_RESPONSE_TO_MECHANICAL_STIMULUS	0.00112599	0.0204385	0.014452	MAPK3/F11R/GOT1	3	Esophagus_Muscularis	rs34238187
GOBP_POSITIVE_REGULATION_OF_CELL_ADHESION	GOBP_POSITIVE_REGULATION_OF_CELL_ADHESION	0.00115207	0.0207545	0.0146986	RASAL3/LEF1/F11R/IL15/FLNA/TNFRSF18	6	Esophagus_Muscularis	rs34238187
KEGG_B_CELL_RECEPTOR_SIGNALING_PATHWAY	KEGG_B_CELL_RECEPTOR_SIGNALING_PATHWAY	0.00117059	0.0209308	0.0148906	MAPK3/IFITM1/INPP5D	3	Esophagus_Muscularis	rs34238187
GOBP_RESPONSE_TO_BMP	GOBP_RESPONSE_TO_BMP	0.00118315	0.0209988	0.0149837	TGFB1/MAPK3/LEF1/SPINT1	4	Esophagus_Muscularis	rs34238187
GOBP_MESENCHYME_DEVELOPMENT	GOBP_MESENCHYME_DEVELOPMENT	0.00119672	0.0210834	0.0151332	TGFB1/HEY2/MAPK3/LEF1/FLNA	5	Esophagus_Muscularis	rs34238187
GOBP_ESTABLISHMENT_OF_ORGANELLE_LOCALIZATION	GOBP_ESTABLISHMENT_OF_ORGANELLE_LOCALIZATION	0.00123739	0.0216407	0.0153976	SLC2A4/GBF1/LAT2/CD300A/CDH3/PAFAH1B1	6	Esophagus_Muscularis	rs34238187
GOBP_ACTIN_FILAMENT_ORGANIZATION	GOBP_ACTIN_FILAMENT_ORGANIZATION	0.00128182	0.0222554	0.0158585	F11R/TMSB10/SH3BP1/ESAM/FLNA/GMFG	6	Esophagus_Muscularis	rs34238187
GOBP_POSITIVE_REGULATION_OF_CYTOKINE_PRODUCTION	GOBP_POSITIVE_REGULATION_OF_CYTOKINE_PRODUCTION	0.00132747	0.0228821	0.0163055	TGFB1/ADRA2A/IL15/LY96/LTB/GPSM3	6	Esophagus_Muscularis	rs34238187
GOMF_ACTIN_BINDING	GOMF_ACTIN_BINDING	0.00135858	0.0228972	0.0166343	FXYD5/TMSB10/CORO2A/MACF1/FLNA/GMFG	6	Esophagus_Muscularis	rs34238187
GOBP_EMBRYONIC_PLACENTA_DEVELOPMENT	GOBP_EMBRYONIC_PLACENTA_DEVELOPMENT	0.00136005	0.0228972	0.0166343	HEY2/LEF1/SPINT1	3	Esophagus_Muscularis	rs34238187
GOBP_DECIDUALIZATION	GOBP_DECIDUALIZATION	0.00136854	0.0228972	0.016641	MAPK3/SPP1	2	Esophagus_Muscularis	rs34238187
GOBP_LABYRINTHINE_LAYER_MORPHOGENESIS	GOBP_LABYRINTHINE_LAYER_MORPHOGENESIS	0.00136854	0.0228972	0.016641	LEF1/SPINT1	2	Esophagus_Muscularis	rs34238187
GOBP_TUMOR_NECROSIS_FACTOR_MEDIATED_SIGNALING_PATHWAY	GOBP_TUMOR_NECROSIS_FACTOR_MEDIATED_SIGNALING_PATHWAY	0.00137613	0.0228972	0.016641	CASP4/TNFRSF1B/TNFRSF18/LTB	4	Esophagus_Muscularis	rs34238187
GOBP_PULMONARY_VALVE_DEVELOPMENT	GOBP_PULMONARY_VALVE_DEVELOPMENT	0.00150989	0.0246784	0.0177821	HEY2/TNFRSF1B	2	Esophagus_Muscularis	rs34238187
GOBP_RESPONSE_TO_INTERFERON_ALPHA	GOBP_RESPONSE_TO_INTERFERON_ALPHA	0.00150989	0.0246784	0.0177821	IFITM1/BST2	2	Esophagus_Muscularis	rs34238187
REACTOME_ANTIVIRAL_MECHANISM_BY_IFN_STIMULATED_GENES	REACTOME_ANTIVIRAL_MECHANISM_BY_IFN_STIMULATED_GENES	0.00151407	0.0246784	0.0177825	MAPK3/UBE2L6/FLNA	3	Esophagus_Muscularis	rs34238187
GOBP_NEGATIVE_REGULATION_OF_CELL_PROJECTION_ORGANIZATION	GOBP_NEGATIVE_REGULATION_OF_CELL_PROJECTION_ORGANIZATION	0.00152673	0.0247166	0.0179066	MINAR1/TBC1D30/FLNA/SPP1	4	Esophagus_Muscularis	rs34238187
GOBP_AGING	GOBP_AGING	0.0015414	0.0247866	0.0179613	HMGA1/MAPK3/INPP5D/TNFRSF1B/IL15	5	Esophagus_Muscularis	rs34238187
GOBP_REGULATION_OF_VIRAL_GENOME_REPLICATION	GOBP_REGULATION_OF_VIRAL_GENOME_REPLICATION	0.00156774	0.0250421	0.0179613	ISG20/IFITM1/BST2	3	Esophagus_Muscularis	rs34238187
GOBP_NEGATIVE_REGULATION_OF_REGULATED_SECRETORY_PATHWAY	GOBP_NEGATIVE_REGULATION_OF_REGULATED_SECRETORY_PATHWAY	0.00165792	0.0262874	0.0179613	ADRA2A/CD300A	2	Esophagus_Muscularis	rs34238187
GOBP_HOMOTYPIC_CELL_CELL_ADHESION	GOBP_HOMOTYPIC_CELL_CELL_ADHESION	0.00167862	0.0262874	0.0179613	F11R/FLNA/CSRP1	3	Esophagus_Muscularis	rs34238187
REACTOME_INTEGRIN_CELL_SURFACE_INTERACTIONS	REACTOME_INTEGRIN_CELL_SURFACE_INTERACTIONS	0.00167862	0.0262874	0.0179613	F11R/ICAM2/SPP1	3	Esophagus_Muscularis	rs34238187
GOBP_POSITIVE_REGULATION_OF_PROTEIN_SERINE_THREONINE_KINASE_ACTIVITY	GOBP_POSITIVE_REGULATION_OF_PROTEIN_SERINE_THREONINE_KINASE_ACTIVITY	0.00170269	0.0264913	0.0179613	TGFB1/MAPK3/ADRA2A/PROK2/IRAK2	5	Esophagus_Muscularis	rs34238187
GOBP_NEGATIVE_REGULATION_OF_CELL_GROWTH	GOBP_NEGATIVE_REGULATION_OF_CELL_GROWTH	0.00172218	0.0266215	0.0179613	TGFB1/BST2/MINAR1/SPP1	4	Esophagus_Muscularis	rs34238187
GOBP_REGULATION_OF_ACTIN_FILAMENT_LENGTH	GOBP_REGULATION_OF_ACTIN_FILAMENT_LENGTH	0.00175636	0.0269759	0.0179613	TMSB10/SH3BP1/ESAM/GMFG	4	Esophagus_Muscularis	rs34238187
GOBP_APICAL_JUNCTION_ASSEMBLY	GOBP_APICAL_JUNCTION_ASSEMBLY	0.00179429	0.0271432	0.0179613	F11R/ESAM/CLDN5	3	Esophagus_Muscularis	rs34238187
GOBP_APOPTOTIC_PROCESS_INVOLVED_IN_MORPHOGENESIS	GOBP_APOPTOTIC_PROCESS_INVOLVED_IN_MORPHOGENESIS	0.00181257	0.0271432	0.0179613	LEF1/TNFRSF1B	2	Esophagus_Muscularis	rs34238187
GOBP_ESTABLISHMENT_OR_MAINTENANCE_OF_MONOPOLAR_CELL_POLARITY	GOBP_ESTABLISHMENT_OR_MAINTENANCE_OF_MONOPOLAR_CELL_POLARITY	0.00181257	0.0271432	0.0179613	GBF1/SH3BP1	2	Esophagus_Muscularis	rs34238187
GOBP_REGULATION_OF_MEMBRANE_PROTEIN_ECTODOMAIN_PROTEOLYSIS	GOBP_REGULATION_OF_MEMBRANE_PROTEIN_ECTODOMAIN_PROTEOLYSIS	0.00181257	0.0271432	0.0179613	ADRA2A/TNFRSF1B	2	Esophagus_Muscularis	rs34238187
GOBP_REGULATION_OF_RAS_PROTEIN_SIGNAL_TRANSDUCTION	GOBP_REGULATION_OF_RAS_PROTEIN_SIGNAL_TRANSDUCTION	0.0018978	0.0281466	0.0179613	RASAL3/F11R/GBF1/SH3BP1	4	Esophagus_Muscularis	rs34238187
GOBP_BONE_REMODELING	GOBP_BONE_REMODELING	0.00191481	0.0281466	0.0179613	TGFB1/INPP5D/SPP1	3	Esophagus_Muscularis	rs34238187
GOBP_NEGATIVE_REGULATION_OF_VIRAL_PROCESS	GOBP_NEGATIVE_REGULATION_OF_VIRAL_PROCESS	0.00191481	0.0281466	0.0179613	ISG20/IFITM1/BST2	3	Esophagus_Muscularis	rs34238187
GOBP_EMBRYONIC_PLACENTA_MORPHOGENESIS	GOBP_EMBRYONIC_PLACENTA_MORPHOGENESIS	0.00197382	0.0284896	0.0179613	LEF1/SPINT1	2	Esophagus_Muscularis	rs34238187
GOBP_NEGATIVE_REGULATION_OF_VIRAL_LIFE_CYCLE	GOBP_NEGATIVE_REGULATION_OF_VIRAL_LIFE_CYCLE	0.00197382	0.0284896	0.0179613	IFITM1/BST2	2	Esophagus_Muscularis	rs34238187
REACTOME_RUNX2_REGULATES_OSTEOBLAST_DIFFERENTIATION	REACTOME_RUNX2_REGULATES_OSTEOBLAST_DIFFERENTIATION	0.00197382	0.0284896	0.0179613	HEY2/MAPK3	2	Esophagus_Muscularis	rs34238187
GOBP_POSITIVE_REGULATION_OF_PEPTIDYL_TYROSINE_PHOSPHORYLATION	GOBP_POSITIVE_REGULATION_OF_PEPTIDYL_TYROSINE_PHOSPHORYLATION	0.00200893	0.0288227	0.0179613	TGFB1/ADRA2A/IL15/TNFRSF18	4	Esophagus_Muscularis	rs34238187
GOBP_POSITIVE_REGULATION_OF_LEUKOCYTE_CHEMOTAXIS	GOBP_POSITIVE_REGULATION_OF_LEUKOCYTE_CHEMOTAXIS	0.00204027	0.0290982	0.0179613	MAPK3/DNM1L/GPSM3	3	Esophagus_Muscularis	rs34238187
GOBP_RESPONSE_TO_EXTRACELLULAR_STIMULUS	GOBP_RESPONSE_TO_EXTRACELLULAR_STIMULUS	0.00206266	0.0292433	0.0179613	NUAK2/MAPK3/DNM1L/IL15/SPP1/OXCT1	6	Esophagus_Muscularis	rs34238187
GOBP_ACTIVATION_OF_PROTEIN_KINASE_ACTIVITY	GOBP_ACTIVATION_OF_PROTEIN_KINASE_ACTIVITY	0.00214568	0.0301109	0.0179613	MAPK3/ADRA2A/PROK2/IRAK2/CD300A	5	Esophagus_Muscularis	rs34238187
GOBP_CYTOKINE_PRODUCTION_INVOLVED_IN_IMMUNE_RESPONSE	GOBP_CYTOKINE_PRODUCTION_INVOLVED_IN_IMMUNE_RESPONSE	0.00217074	0.0301109	0.0179613	TGFB1/BST2/TNFRSF1B	3	Esophagus_Muscularis	rs34238187
GOBP_REGULATION_OF_GLIOGENESIS	GOBP_REGULATION_OF_GLIOGENESIS	0.00217074	0.0301109	0.0179613	TGFB1/TNFRSF1B/SPINT1	3	Esophagus_Muscularis	rs34238187
GOBP_PROTEIN_LOCALIZATION_TO_CELL_PERIPHERY	GOBP_PROTEIN_LOCALIZATION_TO_CELL_PERIPHERY	0.00217412	0.0301109	0.0179613	TGFB1/F11R/MACF1/FLNA/SLMAP	5	Esophagus_Muscularis	rs34238187
GOBP_REGULATION_OF_PHAGOCYTOSIS	GOBP_REGULATION_OF_PHAGOCYTOSIS	0.00223786	0.0305042	0.0179613	IL2RG/IL15/CD300A	3	Esophagus_Muscularis	rs34238187
REACTOME_TOLL_LIKE_RECEPTOR_9_TLR9_CASCADE	REACTOME_TOLL_LIKE_RECEPTOR_9_TLR9_CASCADE	0.00223786	0.0305042	0.0179613	MAPK3/IRAK2/LY96	3	Esophagus_Muscularis	rs34238187
GOBP_REGULATION_OF_GTPASE_ACTIVITY	GOBP_REGULATION_OF_GTPASE_ACTIVITY	0.00224071	0.0305042	0.0179613	RASAL3/F11R/DNM1L/SH3BP1/TBC1D30/ACAP1	6	Esophagus_Muscularis	rs34238187
GOBP_NEGATIVE_REGULATION_OF_CYTOKINE_PRODUCTION_INVOLVED_IN_IMMUNE_RESPONSE	GOBP_NEGATIVE_REGULATION_OF_CYTOKINE_PRODUCTION_INVOLVED_IN_IMMUNE_RESPONSE	0.00231595	0.0311743	0.0181005	TGFB1/BST2	2	Esophagus_Muscularis	rs34238187
GOBP_REGULATION_OF_BICELLULAR_TIGHT_JUNCTION_ASSEMBLY	GOBP_REGULATION_OF_BICELLULAR_TIGHT_JUNCTION_ASSEMBLY	0.00231595	0.0311743	0.0181005	F11R/CLDN5	2	Esophagus_Muscularis	rs34238187
GOBP_TRANSFORMING_GROWTH_FACTOR_BETA_RECEPTOR_SIGNALING_PATHWAY	GOBP_TRANSFORMING_GROWTH_FACTOR_BETA_RECEPTOR_SIGNALING_PATHWAY	0.0023692	0.0312791	0.0184461	TGFB1/F11R/GOT1/CLDN5	4	Esophagus_Muscularis	rs34238187
GOBP_B_CELL_PROLIFERATION	GOBP_B_CELL_PROLIFERATION	0.00237596	0.0312791	0.0184461	LEF1/INPP5D/CD300A	3	Esophagus_Muscularis	rs34238187
KEGG_FC_GAMMA_R_MEDIATED_PHAGOCYTOSIS	KEGG_FC_GAMMA_R_MEDIATED_PHAGOCYTOSIS	0.00237596	0.0312791	0.0184461	MAPK3/DNM1L/INPP5D	3	Esophagus_Muscularis	rs34238187
REACTOME_TRANSCRIPTIONAL_REGULATION_BY_RUNX3	REACTOME_TRANSCRIPTIONAL_REGULATION_BY_RUNX3	0.00237596	0.0312791	0.0184461	TGFB1/LEF1/SPP1	3	Esophagus_Muscularis	rs34238187
GOBP_REGULATION_OF_PROTEIN_SERINE_THREONINE_KINASE_ACTIVITY	GOBP_REGULATION_OF_PROTEIN_SERINE_THREONINE_KINASE_ACTIVITY	0.00240581	0.0314991	0.0186161	TGFB1/MAPK3/ADRA2A/PROK2/IRAK2/CD300A	6	Esophagus_Muscularis	rs34238187
REACTOME_MYD88_INDEPENDENT_TLR4_CASCADE	REACTOME_MYD88_INDEPENDENT_TLR4_CASCADE	0.00244694	0.0317943	0.0188663	MAPK3/IRAK2/LY96	3	Esophagus_Muscularis	rs34238187
GOBP_MYELOID_LEUKOCYTE_DIFFERENTIATION	GOBP_MYELOID_LEUKOCYTE_DIFFERENTIATION	0.0024549	0.0317943	0.0189107	TGFB1/LEF1/INPP5D/IL15	4	Esophagus_Muscularis	rs34238187
REACTOME_INTERLEUKIN_RECEPTOR_SHC_SIGNALING	REACTOME_INTERLEUKIN_RECEPTOR_SHC_SIGNALING	0.00249677	0.0321626	0.0191986	IL2RG/INPP5D	2	Esophagus_Muscularis	rs34238187
GOBP_EPITHELIAL_CELL_DEVELOPMENT	GOBP_EPITHELIAL_CELL_DEVELOPMENT	0.00258743	0.0330446	0.0197775	F11R/CCDC88C/FLNA/CLDN5	4	Esophagus_Muscularis	rs34238187
GOBP_REGULATION_OF_NEUROTRANSMITTER_TRANSPORT	GOBP_REGULATION_OF_NEUROTRANSMITTER_TRANSPORT	0.00259281	0.0330446	0.0197775	ADRA2A/DNM1L/MCTP1	3	Esophagus_Muscularis	rs34238187
REACTOME_PROGRAMMED_CELL_DEATH	REACTOME_PROGRAMMED_CELL_DEATH	0.00263267	0.0333731	0.0200459	MAPK3/CASP4/DNM1L/LY96	4	Esophagus_Muscularis	rs34238187
GOBP_NEGATIVE_REGULATION_OF_ORGANELLE_ORGANIZATION	GOBP_NEGATIVE_REGULATION_OF_ORGANELLE_ORGANIZATION	0.00266744	0.0333731	0.0202926	F11R/DNM1L/TMSB10/TBC1D30/GMFG	5	Esophagus_Muscularis	rs34238187
GOBP_REGULATION_OF_LEUKOCYTE_MEDIATED_IMMUNITY	GOBP_REGULATION_OF_LEUKOCYTE_MEDIATED_IMMUNITY	0.00267846	0.0333731	0.0203286	TGFB1/BST2/TNFRSF1B/CD300A	4	Esophagus_Muscularis	rs34238187
GOBP_MATERNAL_PLACENTA_DEVELOPMENT	GOBP_MATERNAL_PLACENTA_DEVELOPMENT	0.00268403	0.0333731	0.0203286	MAPK3/SPP1	2	Esophagus_Muscularis	rs34238187
GOBP_RESPONSE_TO_MOLECULE_OF_BACTERIAL_ORIGIN	GOBP_RESPONSE_TO_MOLECULE_OF_BACTERIAL_ORIGIN	0.00270074	0.0333731	0.0204372	TGFB1/MAPK3/TNFRSF1B/IRAK2/LY96	5	Esophagus_Muscularis	rs34238187
GOBP_COAGULATION	GOBP_COAGULATION	0.00273435	0.0333731	0.0206729	MAPK3/ADRA2A/F11R/FLNA/CSRP1	5	Esophagus_Muscularis	rs34238187
GOBP_POSITIVE_REGULATION_OF_LYMPHOCYTE_DIFFERENTIATION	GOBP_POSITIVE_REGULATION_OF_LYMPHOCYTE_DIFFERENTIATION	0.00274395	0.0333731	0.0206729	LEF1/INPP5D/IL15	3	Esophagus_Muscularis	rs34238187
GOBP_REGULATION_OF_ALPHA_BETA_T_CELL_ACTIVATION	GOBP_REGULATION_OF_ALPHA_BETA_T_CELL_ACTIVATION	0.00274395	0.0333731	0.0206729	RASAL3/PRDM1/CD300A	3	Esophagus_Muscularis	rs34238187
REACTOME_TNFR2_NON_CANONICAL_NF_KB_PATHWAY	REACTOME_TNFR2_NON_CANONICAL_NF_KB_PATHWAY	0.00274395	0.0333731	0.0206729	TNFRSF1B/TNFRSF18/LTB	3	Esophagus_Muscularis	rs34238187
GOBP_NEUTROPHIL_CHEMOTAXIS	GOBP_NEUTROPHIL_CHEMOTAXIS	0.00282152	0.0338018	0.0211643	CKLF/GBF1/DNM1L	3	Esophagus_Muscularis	rs34238187
GOBP_POSITIVE_REGULATION_OF_MYELOID_CELL_DIFFERENTIATION	GOBP_POSITIVE_REGULATION_OF_MYELOID_CELL_DIFFERENTIATION	0.00282152	0.0338018	0.0211643	TGFB1/LEF1/INPP5D	3	Esophagus_Muscularis	rs34238187
KEGG_TOLL_LIKE_RECEPTOR_SIGNALING_PATHWAY	KEGG_TOLL_LIKE_RECEPTOR_SIGNALING_PATHWAY	0.00282152	0.0338018	0.0211643	MAPK3/LY96/SPP1	3	Esophagus_Muscularis	rs34238187
GOBP_CELL_SURFACE_RECEPTOR_SIGNALING_PATHWAY_INVOLVED_IN_HEART_DEVELOPMENT	GOBP_CELL_SURFACE_RECEPTOR_SIGNALING_PATHWAY_INVOLVED_IN_HEART_DEVELOPMENT	0.0028777	0.0339654	0.021473	TGFB1/HEY2	2	Esophagus_Muscularis	rs34238187
KEGG_THYROID_CANCER	KEGG_THYROID_CANCER	0.0028777	0.0339654	0.021473	MAPK3/LEF1	2	Esophagus_Muscularis	rs34238187
REACTOME_TNFS_BIND_THEIR_PHYSIOLOGICAL_RECEPTORS	REACTOME_TNFS_BIND_THEIR_PHYSIOLOGICAL_RECEPTORS	0.0028777	0.0339654	0.021473	TNFRSF1B/TNFRSF18	2	Esophagus_Muscularis	rs34238187
REACTOME_TOLL_LIKE_RECEPTOR_TLR1_TLR2_CASCADE	REACTOME_TOLL_LIKE_RECEPTOR_TLR1_TLR2_CASCADE	0.00290042	0.0340657	0.0216049	MAPK3/IRAK2/LY96	3	Esophagus_Muscularis	rs34238187
GOBP_ACTIN_POLYMERIZATION_OR_DEPOLYMERIZATION	GOBP_ACTIN_POLYMERIZATION_OR_DEPOLYMERIZATION	0.00296469	0.0346507	0.0220645	TMSB10/SH3BP1/ESAM/GMFG	4	Esophagus_Muscularis	rs34238187
GOBP_NEGATIVE_REGULATION_OF_BIOMINERALIZATION	GOBP_NEGATIVE_REGULATION_OF_BIOMINERALIZATION	0.00307776	0.0352837	0.0227089	TGFB1/HEY2	2	Esophagus_Muscularis	rs34238187
GOBP_PLACENTA_BLOOD_VESSEL_DEVELOPMENT	GOBP_PLACENTA_BLOOD_VESSEL_DEVELOPMENT	0.00307776	0.0352837	0.0227089	HEY2/SPINT1	2	Esophagus_Muscularis	rs34238187
GOBP_RESPONSE_TO_INTERFERON_BETA	GOBP_RESPONSE_TO_INTERFERON_BETA	0.00307776	0.0352837	0.0227089	IFITM1/BST2	2	Esophagus_Muscularis	rs34238187
REACTOME_TIGHT_JUNCTION_INTERACTIONS	REACTOME_TIGHT_JUNCTION_INTERACTIONS	0.00307776	0.0352837	0.0227089	F11R/CLDN5	2	Esophagus_Muscularis	rs34238187
GOBP_ADAPTIVE_IMMUNE_RESPONSE_BASED_ON_SOMATIC_RECOMBINATION_OF_IMMUNE_RECEPTORS_BUILT_FROM_IMMUNOGLOBULIN_SUPERFAMILY_DOMAINS	GOBP_ADAPTIVE_IMMUNE_RESPONSE_BASED_ON_SOMATIC_RECOMBINATION_OF_IMMUNE_RECEPTORS_BUILT_FROM_IMMUNOGLOBULIN_SUPERFAMILY_DOMAINS	0.00312435	0.0356474	0.0230131	TGFB1/LEF1/INPP5D/TNFRSF1B/GZMM	5	Esophagus_Muscularis	rs34238187
GOMF_GTPASE_BINDING	GOMF_GTPASE_BINDING	0.00327117	0.0365992	0.0239229	DNM1L/TBC1D30/FLNA/RAB11FIP4	4	Esophagus_Muscularis	rs34238187
GOBP_AORTIC_VALVE_MORPHOGENESIS	GOBP_AORTIC_VALVE_MORPHOGENESIS	0.00328415	0.0365992	0.0239229	TGFB1/HEY2	2	Esophagus_Muscularis	rs34238187
GOBP_CYTOLYSIS	GOBP_CYTOLYSIS	0.00328415	0.0365992	0.0239229	TGFB1/GZMM	2	Esophagus_Muscularis	rs34238187
GOBP_NEGATIVE_REGULATION_OF_EXOCYTOSIS	GOBP_NEGATIVE_REGULATION_OF_EXOCYTOSIS	0.00328415	0.0365992	0.0239229	ADRA2A/CD300A	2	Esophagus_Muscularis	rs34238187
REACTOME_RUNX2_REGULATES_BONE_DEVELOPMENT	REACTOME_RUNX2_REGULATES_BONE_DEVELOPMENT	0.00328415	0.0365992	0.0239229	HEY2/MAPK3	2	Esophagus_Muscularis	rs34238187
GOBP_PROTEIN_LOCALIZATION_TO_CELL_JUNCTION	GOBP_PROTEIN_LOCALIZATION_TO_CELL_JUNCTION	0.0034024	0.0375507	0.0246795	F11R/FLNA/LSR	3	Esophagus_Muscularis	rs34238187
GOBP_LEUKOCYTE_CELL_CELL_ADHESION	GOBP_LEUKOCYTE_CELL_CELL_ADHESION	0.00343215	0.0375507	0.0247909	RASAL3/LEF1/F11R/IL15/CD300A	5	Esophagus_Muscularis	rs34238187
GOBP_REGULATION_OF_CHEMOTAXIS	GOBP_REGULATION_OF_CHEMOTAXIS	0.00343222	0.0375507	0.0247909	TGFB1/MAPK3/DNM1L/GPSM3	4	Esophagus_Muscularis	rs34238187
GOBP_VESICLE_LOCALIZATION	GOBP_VESICLE_LOCALIZATION	0.00343222	0.0375507	0.0247909	SLC2A4/GBF1/CDH3/PAFAH1B1	4	Esophagus_Muscularis	rs34238187
GOBP_REGULATION_OF_NEURON_PROJECTION_REGENERATION	GOBP_REGULATION_OF_NEURON_PROJECTION_REGENERATION	0.00349685	0.0380839	0.0250886	FLNA/SPP1	2	Esophagus_Muscularis	rs34238187
REACTOME_INTERLEUKIN_4_AND_INTERLEUKIN_13_SIGNALING	REACTOME_INTERLEUKIN_4_AND_INTERLEUKIN_13_SIGNALING	0.00358078	0.0388215	0.0256479	TGFB1/IL2RG/TNFRSF1B	3	Esophagus_Muscularis	rs34238187
GOBP_GRANULOCYTE_DIFFERENTIATION	GOBP_GRANULOCYTE_DIFFERENTIATION	0.00371582	0.0395693	0.0263291	LEF1/INPP5D	2	Esophagus_Muscularis	rs34238187
GOBP_HEAD_MORPHOGENESIS	GOBP_HEAD_MORPHOGENESIS	0.00371582	0.0395693	0.0263291	LEF1/CLDN5	2	Esophagus_Muscularis	rs34238187
GOBP_NEGATIVE_REGULATION_OF_B_CELL_ACTIVATION	GOBP_NEGATIVE_REGULATION_OF_B_CELL_ACTIVATION	0.00371582	0.0395693	0.0263291	INPP5D/CD300A	2	Esophagus_Muscularis	rs34238187
GOBP_REGULATION_OF_NATURAL_KILLER_CELL_ACTIVATION	GOBP_REGULATION_OF_NATURAL_KILLER_CELL_ACTIVATION	0.00371582	0.0395693	0.0263291	PRDM1/IL15	2	Esophagus_Muscularis	rs34238187
GOMF_HISTONE_DEACETYLASE_BINDING	GOMF_HISTONE_DEACETYLASE_BINDING	0.00376478	0.0397963	0.0266495	HEY2/LEF1/PRDM1	3	Esophagus_Muscularis	rs34238187
GOBP_CARBOHYDRATE_HOMEOSTASIS	GOBP_CARBOHYDRATE_HOMEOSTASIS	0.00377036	0.0397963	0.0266495	ADRA2A/SLC2A4/HECTD4/OXCT1	4	Esophagus_Muscularis	rs34238187
GOBP_POSITIVE_REGULATION_OF_SMOOTHENED_SIGNALING_PATHWAY	GOBP_POSITIVE_REGULATION_OF_SMOOTHENED_SIGNALING_PATHWAY	0.00394102	0.0412344	0.0276733	TTC23/GORAB	2	Esophagus_Muscularis	rs34238187
GOBP_RESPONSE_TO_VITAMIN_D	GOBP_RESPONSE_TO_VITAMIN_D	0.00394102	0.0412344	0.0276733	IL15/SPP1	2	Esophagus_Muscularis	rs34238187
KEGG_LEUKOCYTE_TRANSENDOTHELIAL_MIGRATION	KEGG_LEUKOCYTE_TRANSENDOTHELIAL_MIGRATION	0.00405143	0.0422033	0.028402	F11R/ESAM/CLDN5	3	Esophagus_Muscularis	rs34238187
GOBP_CELLULAR_RESPONSE_TO_EXTRACELLULAR_STIMULUS	GOBP_CELLULAR_RESPONSE_TO_EXTRACELLULAR_STIMULUS	0.00406885	0.0422033	0.0284544	NUAK2/MAPK3/DNM1L/IL15	4	Esophagus_Muscularis	rs34238187
GOBP_REGULATION_OF_CARDIOCYTE_DIFFERENTIATION	GOBP_REGULATION_OF_CARDIOCYTE_DIFFERENTIATION	0.00417243	0.0429061	0.0289895	TGFB1/HEY2	2	Esophagus_Muscularis	rs34238187
GOBP_RESPONSE_TO_INTERLEUKIN_4	GOBP_RESPONSE_TO_INTERLEUKIN_4	0.00417243	0.0429061	0.0289895	IL2RG/LEF1	2	Esophagus_Muscularis	rs34238187
GOBP_MUSCLE_ADAPTATION	GOBP_MUSCLE_ADAPTATION	0.00424971	0.0431453	0.0293993	HEY2/TNFRSF1B/IL15	3	Esophagus_Muscularis	rs34238187
GOBP_REGULATION_OF_DNA_BINDING	GOBP_REGULATION_OF_DNA_BINDING	0.00424971	0.0431453	0.0293993	TGFB1/HEY2/LEF1	3	Esophagus_Muscularis	rs34238187
GOBP_REGULATION_OF_MYELOID_LEUKOCYTE_DIFFERENTIATION	GOBP_REGULATION_OF_MYELOID_LEUKOCYTE_DIFFERENTIATION	0.00424971	0.0431453	0.0293993	TGFB1/LEF1/INPP5D	3	Esophagus_Muscularis	rs34238187
GOBP_HEART_MORPHOGENESIS	GOBP_HEART_MORPHOGENESIS	0.00431886	0.0436624	0.0298137	TGFB1/HEY2/FLNA/CLDN5	4	Esophagus_Muscularis	rs34238187
GOBP_REGULATION_OF_LEUKOCYTE_CHEMOTAXIS	GOBP_REGULATION_OF_LEUKOCYTE_CHEMOTAXIS	0.00435102	0.0438027	0.0299633	MAPK3/DNM1L/GPSM3	3	Esophagus_Muscularis	rs34238187
GOBP_APOPTOTIC_PROCESS_INVOLVED_IN_DEVELOPMENT	GOBP_APOPTOTIC_PROCESS_INVOLVED_IN_DEVELOPMENT	0.00440999	0.0438438	0.0301514	LEF1/TNFRSF1B	2	Esophagus_Muscularis	rs34238187
GOBP_NEGATIVE_REGULATION_OF_GENE_SILENCING	GOBP_NEGATIVE_REGULATION_OF_GENE_SILENCING	0.00440999	0.0438438	0.0301514	TGFB1/HMGA1	2	Esophagus_Muscularis	rs34238187
REACTOME_NOD1_2_SIGNALING_PATHWAY	REACTOME_NOD1_2_SIGNALING_PATHWAY	0.00440999	0.0438438	0.0301514	CASP4/IRAK2	2	Esophagus_Muscularis	rs34238187
GOBP_ALPHA_BETA_T_CELL_PROLIFERATION	GOBP_ALPHA_BETA_T_CELL_PROLIFERATION	0.00465369	0.0457961	0.0314415	RASAL3/IL15	2	Esophagus_Muscularis	rs34238187
GOBP_REGULATION_OF_KERATINOCYTE_PROLIFERATION	GOBP_REGULATION_OF_KERATINOCYTE_PROLIFERATION	0.00465369	0.0457961	0.0314415	EPPK1/CDH3	2	Esophagus_Muscularis	rs34238187
GOBP_NEUTROPHIL_MIGRATION	GOBP_NEUTROPHIL_MIGRATION	0.00466371	0.0457961	0.0314596	CKLF/GBF1/DNM1L	3	Esophagus_Muscularis	rs34238187
GOBP_NEGATIVE_REGULATION_OF_GROWTH	GOBP_NEGATIVE_REGULATION_OF_GROWTH	0.00471302	0.045904	0.0317174	TGFB1/BST2/MINAR1/SPP1	4	Esophagus_Muscularis	rs34238187
GOBP_VASCULAR_PROCESS_IN_CIRCULATORY_SYSTEM	GOBP_VASCULAR_PROCESS_IN_CIRCULATORY_SYSTEM	0.00471302	0.045904	0.0317174	TGFB1/ADRA2A/SLC2A4/CLDN5	4	Esophagus_Muscularis	rs34238187
GOBP_T_CELL_DIFFERENTIATION	GOBP_T_CELL_DIFFERENTIATION	0.00478098	0.0463774	0.0321076	LEF1/PRDM1/IL15/TNFRSF18	4	Esophagus_Muscularis	rs34238187
GOBP_MACROPHAGE_CHEMOTAXIS	GOBP_MACROPHAGE_CHEMOTAXIS	0.00490349	0.047374	0.0327422	MAPK3/CKLF	2	Esophagus_Muscularis	rs34238187
GOBP_OSSIFICATION	GOBP_OSSIFICATION	0.00493531	0.04749	0.0329034	TGFB1/MAPK3/LEF1/IFITM1/SPP1	5	Esophagus_Muscularis	rs34238187
GOBP_NEGATIVE_REGULATION_OF_IMMUNE_EFFECTOR_PROCESS	GOBP_NEGATIVE_REGULATION_OF_IMMUNE_EFFECTOR_PROCESS	0.00498968	0.0478211	0.0331114	TGFB1/BST2/CD300A	3	Esophagus_Muscularis	rs34238187
GOBP_HYALURONAN_METABOLIC_PROCESS	GOBP_HYALURONAN_METABOLIC_PROCESS	0.00515934	0.0486684	0.0338962	TGFB1/IL15	2	Esophagus_Muscularis	rs34238187
GOBP_INTESTINAL_ABSORPTION	GOBP_INTESTINAL_ABSORPTION	0.00515934	0.0486684	0.0338962	ADRA2A/F11R	2	Esophagus_Muscularis	rs34238187
GOBP_NEGATIVE_REGULATION_OF_PRODUCTION_OF_MOLECULAR_MEDIATOR_OF_IMMUNE_RESPONSE	GOBP_NEGATIVE_REGULATION_OF_PRODUCTION_OF_MOLECULAR_MEDIATOR_OF_IMMUNE_RESPONSE	0.00515934	0.0486684	0.0338962	TGFB1/BST2	2	Esophagus_Muscularis	rs34238187
GOMF_PALMITOYLTRANSFERASE_ACTIVITY	GOMF_PALMITOYLTRANSFERASE_ACTIVITY	0.00515934	0.0486684	0.0338962	CPT1C/SPTSSB	2	Esophagus_Muscularis	rs34238187
GOBP_POSITIVE_REGULATION_OF_CELL_ACTIVATION	GOBP_POSITIVE_REGULATION_OF_CELL_ACTIVATION	0.00525184	0.0493467	0.0344248	TGFB1/RASAL3/LEF1/INPP5D/IL15	5	Esophagus_Muscularis	rs34238187
GOBP_PROTEIN_MONO_ADP_RIBOSYLATION	GOBP_PROTEIN_MONO_ADP_RIBOSYLATION	2.33321e-06	0.000468576	5.23133e-05	PARP9/PARP12	2	Heart_Atrial_Appendage	rs34238187
GOMF_PROTEIN_ADP_RIBOSYLASE_ACTIVITY	GOMF_PROTEIN_ADP_RIBOSYLASE_ACTIVITY	4.2405e-06	0.000468576	5.23133e-05	PARP9/PARP12	2	Heart_Atrial_Appendage	rs34238187
GOMF_NADPLUS_ADP_RIBOSYLTRANSFERASE_ACTIVITY	GOMF_NADPLUS_ADP_RIBOSYLTRANSFERASE_ACTIVITY	9.74531e-06	0.000717905	6.66785e-05	PARP9/PARP12	2	Heart_Atrial_Appendage	rs34238187
GOBP_PROTEIN_ADP_RIBOSYLATION	GOBP_PROTEIN_ADP_RIBOSYLATION	1.97885e-05	0.00109331	0.000128948	PARP9/PARP12	2	Heart_Atrial_Appendage	rs34238187
GOMF_TRANSFERASE_ACTIVITY_TRANSFERRING_PENTOSYL_GROUPS	GOMF_TRANSFERASE_ACTIVITY_TRANSFERRING_PENTOSYL_GROUPS	4.31407e-05	0.00190682	0.000236138	PARP9/PARP12	2	Heart_Atrial_Appendage	rs34238187
GOBP_REGULATION_OF_RESPONSE_TO_CYTOKINE_STIMULUS	GOBP_REGULATION_OF_RESPONSE_TO_CYTOKINE_STIMULUS	0.000616972	0.0227251	0.000699736	PARP9/IRAK2	2	Heart_Atrial_Appendage	rs34238187
GOMF_CYTOKINE_ACTIVITY	GOMF_CYTOKINE_ACTIVITY	0.000942432	0.0289452	0.000927801	CKLF/LTA	2	Heart_Atrial_Appendage	rs34238187
GOMF_CYTOKINE_RECEPTOR_BINDING	GOMF_CYTOKINE_RECEPTOR_BINDING	0.00124175	0.0289452	0.00118828	CKLF/LTA	2	Heart_Atrial_Appendage	rs34238187
GOMF_TRANSFERASE_ACTIVITY_TRANSFERRING_GLYCOSYL_GROUPS	GOMF_TRANSFERASE_ACTIVITY_TRANSFERRING_GLYCOSYL_GROUPS	0.00127851	0.0289452	0.00121496	PARP9/PARP12	2	Heart_Atrial_Appendage	rs34238187
GOBP_RESPONSE_TO_MOLECULE_OF_BACTERIAL_ORIGIN	GOBP_RESPONSE_TO_MOLECULE_OF_BACTERIAL_ORIGIN	0.0020402	0.0289452	0.00181289	LTA/IRAK2	2	Heart_Atrial_Appendage	rs34238187
GOBP_POSITIVE_REGULATION_OF_DEFENSE_RESPONSE	GOBP_POSITIVE_REGULATION_OF_DEFENSE_RESPONSE	0.00219375	0.0289452	0.0019142	LTA/PARP9	2	Heart_Atrial_Appendage	rs34238187
GOBP_REGULATION_OF_IMMUNE_EFFECTOR_PROCESS	GOBP_REGULATION_OF_IMMUNE_EFFECTOR_PROCESS	0.00362836	0.0289452	0.00272809	LTA/PARP9	2	Heart_Atrial_Appendage	rs34238187
GOBP_CILIUM_ORGANIZATION	GOBP_CILIUM_ORGANIZATION	0.000358393	0.0482851	0.0187625	MNS1/DYNC2H1/CC2D2A	3	Lung	rs34238187
GOBP_PATTERN_SPECIFICATION_PROCESS	GOBP_PATTERN_SPECIFICATION_PROCESS	0.000406553	0.0482851	0.0189076	NKX3-2/MNS1/DYNC2H1	3	Lung	rs34238187
GOBP_SPECIFICATION_OF_SYMMETRY	GOBP_SPECIFICATION_OF_SYMMETRY	0.000897348	0.0482851	0.0230499	NKX3-2/DYNC2H1	2	Lung	rs34238187
GOBP_SMOOTHENED_SIGNALING_PATHWAY	GOBP_SMOOTHENED_SIGNALING_PATHWAY	0.000954228	0.0482851	0.0230499	DYNC2H1/CC2D2A	2	Lung	rs34238187
REACTOME_CILIUM_ASSEMBLY	REACTOME_CILIUM_ASSEMBLY	0.00224279	0.0482851	0.0257835	DYNC2H1/CC2D2A	2	Lung	rs34238187
GOBP_CIRCADIAN_RHYTHM	GOBP_CIRCADIAN_RHYTHM	0.00246597	0.0482851	0.0271299	MAPK10/MTTP	2	Lung	rs34238187
GOBP_RHYTHMIC_PROCESS	GOBP_RHYTHMIC_PROCESS	0.00467126	0.0482851	0.0342203	MAPK10/MTTP	2	Lung	rs34238187
REACTOME_ORGANELLE_BIOGENESIS_AND_MAINTENANCE	REACTOME_ORGANELLE_BIOGENESIS_AND_MAINTENANCE	0.00473324	0.0482851	0.0342203	DYNC2H1/CC2D2A	2	Lung	rs34238187
GOBP_REGIONALIZATION	GOBP_REGIONALIZATION	0.00570861	0.0482851	0.0359078	MNS1/DYNC2H1	2	Lung	rs34238187
GOBP_PEPTIDE_SECRETION	GOBP_PEPTIDE_SECRETION	2.03596e-06	0.000325754	0.000570069	PORCN/GPR27/RAB13/FFAR1	4	Nerve_Tibial	rs34238187
GOBP_POSITIVE_REGULATION_OF_INSULIN_SECRETION	GOBP_POSITIVE_REGULATION_OF_INSULIN_SECRETION	0.000140026	0.0100315	0.0175552	GPR27/FFAR1	2	Nerve_Tibial	rs34238187
GOBP_SIGNAL_RELEASE	GOBP_SIGNAL_RELEASE	0.000190718	0.0100315	0.0175552	PORCN/GPR27/FFAR1	3	Nerve_Tibial	rs34238187
GOBP_POSITIVE_REGULATION_OF_PEPTIDE_HORMONE_SECRETION	GOBP_POSITIVE_REGULATION_OF_PEPTIDE_HORMONE_SECRETION	0.000250788	0.0100315	0.0175552	GPR27/FFAR1	2	Nerve_Tibial	rs34238187
GOBP_POSITIVE_REGULATION_OF_HORMONE_SECRETION	GOBP_POSITIVE_REGULATION_OF_HORMONE_SECRETION	0.000426672	0.0136535	0.0198032	GPR27/FFAR1	2	Nerve_Tibial	rs34238187
GOBP_POSITIVE_REGULATION_OF_PEPTIDE_SECRETION	GOBP_POSITIVE_REGULATION_OF_PEPTIDE_SECRETION	0.000631339	0.0168357	0.0198032	GPR27/FFAR1	2	Nerve_Tibial	rs34238187
GOBP_INSULIN_SECRETION	GOBP_INSULIN_SECRETION	0.00117969	0.0240467	0.0198032	GPR27/FFAR1	2	Nerve_Tibial	rs34238187
GOBP_REGULATION_OF_PEPTIDE_HORMONE_SECRETION	GOBP_REGULATION_OF_PEPTIDE_HORMONE_SECRETION	0.00120233	0.0240467	0.0198032	GPR27/FFAR1	2	Nerve_Tibial	rs34238187
GOBP_CARBOHYDRATE_HOMEOSTASIS	GOBP_CARBOHYDRATE_HOMEOSTASIS	0.00145263	0.0241021	0.0213401	GPR27/FFAR1	2	Nerve_Tibial	rs34238187
GOBP_PEPTIDE_HORMONE_SECRETION	GOBP_PEPTIDE_HORMONE_SECRETION	0.00167199	0.0241021	0.0213401	GPR27/FFAR1	2	Nerve_Tibial	rs34238187
GOBP_REGULATION_OF_HORMONE_SECRETION	GOBP_REGULATION_OF_HORMONE_SECRETION	0.00184977	0.0241021	0.0213401	GPR27/FFAR1	2	Nerve_Tibial	rs34238187
GOBP_POSITIVE_REGULATION_OF_SECRETION	GOBP_POSITIVE_REGULATION_OF_SECRETION	0.00237124	0.0241021	0.0213401	GPR27/FFAR1	2	Nerve_Tibial	rs34238187
GOBP_REGULATION_OF_PEPTIDE_SECRETION	GOBP_REGULATION_OF_PEPTIDE_SECRETION	0.0025807	0.0241021	0.0213401	GPR27/FFAR1	2	Nerve_Tibial	rs34238187
GOBP_HORMONE_TRANSPORT	GOBP_HORMONE_TRANSPORT	0.00264685	0.0241021	0.0213401	GPR27/FFAR1	2	Nerve_Tibial	rs34238187
GOBP_POSITIVE_REGULATION_OF_ESTABLISHMENT_OF_PROTEIN_LOCALIZATION	GOBP_POSITIVE_REGULATION_OF_ESTABLISHMENT_OF_PROTEIN_LOCALIZATION	0.00290206	0.0241021	0.0213401	GPR27/FFAR1	2	Nerve_Tibial	rs34238187
GOBP_POSITIVE_REGULATION_OF_ANION_TRANSPORT	GOBP_POSITIVE_REGULATION_OF_ANION_TRANSPORT	0.00605794	0.032309	0.0213401	GPR27/FFAR1	2	Nerve_Tibial	rs34238187
REACTOME_CYTOCHROME_P450_ARRANGED_BY_SUBSTRATE_TYPE	REACTOME_CYTOCHROME_P450_ARRANGED_BY_SUBSTRATE_TYPE	2.70221e-05	0.00206318	0.000369776	CYP4A11/CYP11B1	2	Ovary	rs34238187
GOMF_MONOOXYGENASE_ACTIVITY	GOMF_MONOOXYGENASE_ACTIVITY	6.35064e-05	0.00206318	0.000409174	CYP4A11/CYP11B1	2	Ovary	rs34238187
REACTOME_PHASE_I_FUNCTIONALIZATION_OF_COMPOUNDS	REACTOME_PHASE_I_FUNCTIONALIZATION_OF_COMPOUNDS	6.99652e-05	0.00206318	0.000409174	CYP4A11/CYP11B1	2	Ovary	rs34238187
GOBP_OLEFINIC_COMPOUND_METABOLIC_PROCESS	GOBP_OLEFINIC_COMPOUND_METABOLIC_PROCESS	8.82128e-05	0.00206318	0.000409174	CYP4A11/CYP11B1	2	Ovary	rs34238187
REACTOME_REGULATION_OF_LIPID_METABOLISM_BY_PPARALPHA	REACTOME_REGULATION_OF_LIPID_METABOLISM_BY_PPARALPHA	8.97035e-05	0.00206318	0.000409174	MED19/CYP4A11	2	Ovary	rs34238187
GOMF_IRON_ION_BINDING	GOMF_IRON_ION_BINDING	0.000140185	0.00229261	0.000454331	CYP4A11/CYP11B1	2	Ovary	rs34238187
GOMF_TETRAPYRROLE_BINDING	GOMF_TETRAPYRROLE_BINDING	0.000140185	0.00229261	0.000454331	CYP4A11/CYP11B1	2	Ovary	rs34238187
GOMF_OXIDOREDUCTASE_ACTIVITY_ACTING_ON_PAIRED_DONORS_WITH_INCORPORATION_OR_REDUCTION_OF_MOLECULAR_OXYGEN	GOMF_OXIDOREDUCTASE_ACTIVITY_ACTING_ON_PAIRED_DONORS_WITH_INCORPORATION_OR_REDUCTION_OF_MOLECULAR_OXYGEN	0.000159486	0.00229261	0.000454331	CYP4A11/CYP11B1	2	Ovary	rs34238187
GOBP_REGULATION_OF_BLOOD_PRESSURE	GOBP_REGULATION_OF_BLOOD_PRESSURE	0.000195128	0.0024933	0.000454331	CYP4A11/CYP11B1	2	Ovary	rs34238187
REACTOME_BIOLOGICAL_OXIDATIONS	REACTOME_BIOLOGICAL_OXIDATIONS	0.000306616	0.00352608	0.00052057	CYP4A11/CYP11B1	2	Ovary	rs34238187
GOMF_CHAPERONE_BINDING	GOMF_CHAPERONE_BINDING	1.71166e-06	0.00137276	0.00279812	SOD1/HSPE1/STIP1/USP13	4	Pancreas	rs34238187
GOMF_HISTONE_METHYLTRANSFERASE_ACTIVITY_H3_K4_SPECIFIC	GOMF_HISTONE_METHYLTRANSFERASE_ACTIVITY_H3_K4_SPECIFIC	8.44448e-05	0.0207678	0.0178078	KMT2D/KMT2C	2	Pancreas	rs34238187
REACTOME_CHROMATIN_MODIFYING_ENZYMES	REACTOME_CHROMATIN_MODIFYING_ENZYMES	8.67721e-05	0.0207678	0.0178078	KMT2D/KDM3A/KMT2C/BRWD1	4	Pancreas	rs34238187
GOBP_INTRACELLULAR_STEROID_HORMONE_RECEPTOR_SIGNALING_PATHWAY	GOBP_INTRACELLULAR_STEROID_HORMONE_RECEPTOR_SIGNALING_PATHWAY	0.000125232	0.0207678	0.0240849	KMT2D/KDM3A/UBR5	3	Pancreas	rs34238187
GOBP_PEPTIDYL_LYSINE_METHYLATION	GOBP_PEPTIDYL_LYSINE_METHYLATION	0.000160921	0.0207678	0.0241143	KMT2D/KDM3A/KMT2C	3	Pancreas	rs34238187
GOBP_PEPTIDYL_LYSINE_DIMETHYLATION	GOBP_PEPTIDYL_LYSINE_DIMETHYLATION	0.000162034	0.0207678	0.0241143	KMT2D/KDM3A	2	Pancreas	rs34238187
GOBP_HISTONE_METHYLATION	GOBP_HISTONE_METHYLATION	0.000189466	0.0207678	0.0241143	KMT2D/KDM3A/KMT2C	3	Pancreas	rs34238187
GOBP_STEROID_HORMONE_MEDIATED_SIGNALING_PATHWAY	GOBP_STEROID_HORMONE_MEDIATED_SIGNALING_PATHWAY	0.00020716	0.0207678	0.0241143	KMT2D/KDM3A/UBR5	3	Pancreas	rs34238187
GOBP_POSITIVE_REGULATION_OF_CELLULAR_PROTEIN_CATABOLIC_PROCESS	GOBP_POSITIVE_REGULATION_OF_CELLULAR_PROTEIN_CATABOLIC_PROCESS	0.000288578	0.0257155	0.0241143	UQCC2/HSP90AA1/USP13	3	Pancreas	rs34238187
GOBP_INNER_EAR_RECEPTOR_CELL_STEREOCILIUM_ORGANIZATION	GOBP_INNER_EAR_RECEPTOR_CELL_STEREOCILIUM_ORGANIZATION	0.000324604	0.0260332	0.0241143	SOD1/CECR2	2	Pancreas	rs34238187
KEGG_PRION_DISEASES	KEGG_PRION_DISEASES	0.000414464	0.0260712	0.0241143	SOD1/STIP1	2	Pancreas	rs34238187
GOBP_PROTEIN_METHYLATION	GOBP_PROTEIN_METHYLATION	0.000416204	0.0260712	0.0241143	KMT2D/KDM3A/KMT2C	3	Pancreas	rs34238187
GOBP_REGULATION_OF_HEMOPOIESIS	GOBP_REGULATION_OF_HEMOPOIESIS	0.000422601	0.0260712	0.0241143	SOD1/KMT2D/KMT2C/KLF13	4	Pancreas	rs34238187
GOBP_RESPONSE_TO_INTERLEUKIN_7	GOBP_RESPONSE_TO_INTERLEUKIN_7	0.000541879	0.026196	0.0241143	STIP1/BRWD1	2	Pancreas	rs34238187
GOBP_INNER_EAR_RECEPTOR_CELL_DEVELOPMENT	GOBP_INNER_EAR_RECEPTOR_CELL_DEVELOPMENT	0.000569362	0.026196	0.0241143	SOD1/CECR2	2	Pancreas	rs34238187
GOBP_HORMONE_MEDIATED_SIGNALING_PATHWAY	GOBP_HORMONE_MEDIATED_SIGNALING_PATHWAY	0.00060219	0.026196	0.0241143	KMT2D/KDM3A/UBR5	3	Pancreas	rs34238187
GOBP_RESPONSE_TO_ANTIBIOTIC	GOBP_RESPONSE_TO_ANTIBIOTIC	0.000626322	0.026196	0.0241143	SOD1/HSP90AA1	2	Pancreas	rs34238187
GOMF_HISTONE_LYSINE_N_METHYLTRANSFERASE_ACTIVITY	GOMF_HISTONE_LYSINE_N_METHYLTRANSFERASE_ACTIVITY	0.000626322	0.026196	0.0241143	KMT2D/KMT2C	2	Pancreas	rs34238187
GOBP_COVALENT_CHROMATIN_MODIFICATION	GOBP_COVALENT_CHROMATIN_MODIFICATION	0.000626819	0.026196	0.0241143	KMT2D/KDM3A/KMT2C/UBR5	4	Pancreas	rs34238187
GOBP_CELLULAR_RESPONSE_TO_STEROID_HORMONE_STIMULUS	GOBP_CELLULAR_RESPONSE_TO_STEROID_HORMONE_STIMULUS	0.000677481	0.026196	0.0241143	KMT2D/KDM3A/UBR5	3	Pancreas	rs34238187
GOBP_NEGATIVE_REGULATION_OF_HISTONE_MODIFICATION	GOBP_NEGATIVE_REGULATION_OF_HISTONE_MODIFICATION	0.00068593	0.026196	0.0241143	KDM3A/UBR5	2	Pancreas	rs34238187
GOBP_POSITIVE_REGULATION_OF_PROTEIN_CATABOLIC_PROCESS	GOBP_POSITIVE_REGULATION_OF_PROTEIN_CATABOLIC_PROCESS	0.000938609	0.0317686	0.0287798	UQCC2/HSP90AA1/USP13	3	Pancreas	rs34238187
GOBP_HISTONE_H3_K4_METHYLATION	GOBP_HISTONE_H3_K4_METHYLATION	0.00095068	0.0317686	0.0287798	KMT2D/KMT2C	2	Pancreas	rs34238187
GOMF_HISTONE_METHYLTRANSFERASE_ACTIVITY	GOMF_HISTONE_METHYLTRANSFERASE_ACTIVITY	0.00095068	0.0317686	0.0287798	KMT2D/KMT2C	2	Pancreas	rs34238187
REACTOME_HSP90_CHAPERONE_CYCLE_FOR_STEROID_HORMONE_RECEPTORS_SHR	REACTOME_HSP90_CHAPERONE_CYCLE_FOR_STEROID_HORMONE_RECEPTORS_SHR	0.00109872	0.0352471	0.0323626	HSP90AA1/STIP1	2	Pancreas	rs34238187
GOMF_LYSINE_N_METHYLTRANSFERASE_ACTIVITY	GOMF_LYSINE_N_METHYLTRANSFERASE_ACTIVITY	0.00125712	0.0371754	0.0349494	KMT2D/KMT2C	2	Pancreas	rs34238187
GOBP_REGULATION_OF_CELLULAR_PROTEIN_CATABOLIC_PROCESS	GOBP_REGULATION_OF_CELLULAR_PROTEIN_CATABOLIC_PROCESS	0.00128526	0.0371754	0.0349494	UQCC2/HSP90AA1/USP13	3	Pancreas	rs34238187
GOBP_MECHANORECEPTOR_DIFFERENTIATION	GOBP_MECHANORECEPTOR_DIFFERENTIATION	0.00129833	0.0371754	0.0349494	SOD1/CECR2	2	Pancreas	rs34238187
GOBP_NEGATIVE_REGULATION_OF_CHROMATIN_ORGANIZATION	GOBP_NEGATIVE_REGULATION_OF_CHROMATIN_ORGANIZATION	0.00138267	0.0371754	0.0363722	KDM3A/UBR5	2	Pancreas	rs34238187
GOBP_REGULATION_OF_MYELOID_CELL_DIFFERENTIATION	GOBP_REGULATION_OF_MYELOID_CELL_DIFFERENTIATION	0.0013906	0.0371754	0.0363722	KMT2D/KMT2C/KLF13	3	Pancreas	rs34238187
GOBP_RNA_DEPENDENT_DNA_BIOSYNTHETIC_PROCESS	GOBP_RNA_DEPENDENT_DNA_BIOSYNTHETIC_PROCESS	0.00165102	0.0412658	0.0390949	HSP90AA1/RAD50	2	Pancreas	rs34238187
GOBP_INTRACELLULAR_RECEPTOR_SIGNALING_PATHWAY	GOBP_INTRACELLULAR_RECEPTOR_SIGNALING_PATHWAY	0.00165139	0.0412658	0.0390949	KMT2D/KDM3A/UBR5	3	Pancreas	rs34238187
REACTOME_PKMTS_METHYLATE_HISTONE_LYSINES	REACTOME_PKMTS_METHYLATE_HISTONE_LYSINES	0.00169797	0.0412658	0.0390949	KMT2D/KMT2C	2	Pancreas	rs34238187
GOBP_DNA_REPLICATION	GOBP_DNA_REPLICATION	0.00175655	0.0414339	0.0396068	PTMS/BOD1L1/RAD50	3	Pancreas	rs34238187
GOBP_TELOMERE_MAINTENANCE_VIA_TELOMERE_LENGTHENING	GOBP_TELOMERE_MAINTENANCE_VIA_TELOMERE_LENGTHENING	0.00214883	0.0487608	0.0446407	HSP90AA1/RAD50	2	Pancreas	rs34238187
GOBP_MACROMOLECULE_METHYLATION	GOBP_MACROMOLECULE_METHYLATION	0.00223954	0.0487608	0.0449731	KMT2D/KDM3A/KMT2C	3	Pancreas	rs34238187
GOBP_REGULATION_OF_MEGAKARYOCYTE_DIFFERENTIATION	GOBP_REGULATION_OF_MEGAKARYOCYTE_DIFFERENTIATION	0.00231036	0.0487608	0.0452219	KMT2D/KMT2C	2	Pancreas	rs34238187
GOMF_UBIQUITIN_BINDING	GOMF_UBIQUITIN_BINDING	0.00231036	0.0487608	0.0452219	USP13/UBR5	2	Pancreas	rs34238187
GOMF_PROTEIN_METHYLTRANSFERASE_ACTIVITY	GOMF_PROTEIN_METHYLTRANSFERASE_ACTIVITY	0.00242115	0.0497889	0.0460227	KMT2D/KMT2C	2	Pancreas	rs34238187
GOBP_COVALENT_CHROMATIN_MODIFICATION	GOBP_COVALENT_CHROMATIN_MODIFICATION	1.17157e-05	0.00366701	0.00788706	GTF3C4/KDM3B/PPHLN1/PRKD1	4	Pituitary	rs34238187
GOBP_POSITIVE_REGULATION_OF_CHROMATIN_ORGANIZATION	GOBP_POSITIVE_REGULATION_OF_CHROMATIN_ORGANIZATION	0.00047923	0.0484503	0.0261513	PPHLN1/PRKD1	2	Pituitary	rs34238187
GOBP_CELLULAR_RESPONSE_TO_TOXIC_SUBSTANCE	GOBP_CELLULAR_RESPONSE_TO_TOXIC_SUBSTANCE	0.000711694	0.0484503	0.0274839	PPP1R9A/KDM3B	2	Pituitary	rs34238187
GOBP_REGULATION_OF_OSTEOBLAST_DIFFERENTIATION	GOBP_REGULATION_OF_OSTEOBLAST_DIFFERENTIATION	0.000770765	0.0484503	0.0275115	CHRD/PRKD1	2	Pituitary	rs34238187
GOBP_POSITIVE_REGULATION_OF_NEURON_PROJECTION_DEVELOPMENT	GOBP_POSITIVE_REGULATION_OF_NEURON_PROJECTION_DEVELOPMENT	0.00111481	0.0484503	0.0282013	PPP1R9A/PRKD1	2	Pituitary	rs34238187
GOBP_POSITIVE_REGULATION_OF_CHROMOSOME_ORGANIZATION	GOBP_POSITIVE_REGULATION_OF_CHROMOSOME_ORGANIZATION	0.00127885	0.0484503	0.0282013	PPHLN1/PRKD1	2	Pituitary	rs34238187
GOBP_REGULATION_OF_CHROMATIN_ORGANIZATION	GOBP_REGULATION_OF_CHROMATIN_ORGANIZATION	0.00162217	0.0484503	0.0282013	PPHLN1/PRKD1	2	Pituitary	rs34238187
GOBP_OSTEOBLAST_DIFFERENTIATION	GOBP_OSTEOBLAST_DIFFERENTIATION	0.00232216	0.0484503	0.0333568	CHRD/PRKD1	2	Pituitary	rs34238187
GOBP_RESPONSE_TO_TOXIC_SUBSTANCE	GOBP_RESPONSE_TO_TOXIC_SUBSTANCE	0.00268387	0.0484503	0.0361054	PPP1R9A/KDM3B	2	Pituitary	rs34238187
GOBP_REGULATION_OF_CHROMOSOME_ORGANIZATION	GOBP_REGULATION_OF_CHROMOSOME_ORGANIZATION	0.00348177	0.0484503	0.0427048	PPHLN1/PRKD1	2	Pituitary	rs34238187
GOBP_POSITIVE_REGULATION_OF_CELL_PROJECTION_ORGANIZATION	GOBP_POSITIVE_REGULATION_OF_CELL_PROJECTION_ORGANIZATION	0.00546064	0.0484503	0.046628	PPP1R9A/PRKD1	2	Pituitary	rs34238187
GOBP_DNA_CONFORMATION_CHANGE	GOBP_DNA_CONFORMATION_CHANGE	0.00570954	0.0484503	0.0470128	MCM4/PPHLN1	2	Pituitary	rs34238187
GOBP_GOLGI_VESICLE_TRANSPORT	GOBP_GOLGI_VESICLE_TRANSPORT	0.00635432	0.0484503	0.0488945	SEC22C/PRKD1	2	Pituitary	rs34238187
GOBP_OSSIFICATION	GOBP_OSSIFICATION	0.00727529	0.0484503	0.0501142	CHRD/PRKD1	2	Pituitary	rs34238187
GOBP_REGULATION_OF_NEURON_PROJECTION_DEVELOPMENT	GOBP_REGULATION_OF_NEURON_PROJECTION_DEVELOPMENT	0.00832815	0.049063	0.0519289	PPP1R9A/PRKD1	2	Pituitary	rs34238187
GOBP_NEGATIVE_REGULATION_OF_TRANSPORT	GOBP_NEGATIVE_REGULATION_OF_TRANSPORT	0.00870629	0.049123	0.0527436	PPP1R9A/PRKD1	2	Pituitary	rs34238187
GOBP_POSITIVE_REGULATION_OF_LEUKOCYTE_ADHESION_TO_VASCULAR_ENDOTHELIAL_CELL	GOBP_POSITIVE_REGULATION_OF_LEUKOCYTE_ADHESION_TO_VASCULAR_ENDOTHELIAL_CELL	7.03752e-08	0.000116964	1.02556e-05	ICAM1/IL6/ETS1/SELE	4	Skin_Sun_Exposed_Lower_leg	rs34238187
GOBP_RESPONSE_TO_CORTICOSTEROID	GOBP_RESPONSE_TO_CORTICOSTEROID	3.57588e-07	0.000297155	3.83234e-05	ICAM1/ZFP36/IL6/STC1/ZFP36L2/HSD3B1	6	Skin_Sun_Exposed_Lower_leg	rs34238187
GOBP_REGULATION_OF_LEUKOCYTE_ADHESION_TO_VASCULAR_ENDOTHELIAL_CELL	GOBP_REGULATION_OF_LEUKOCYTE_ADHESION_TO_VASCULAR_ENDOTHELIAL_CELL	6.22498e-07	0.000344864	6.34864e-05	ICAM1/IL6/ETS1/SELE	4	Skin_Sun_Exposed_Lower_leg	rs34238187
GOBP_LEUKOCYTE_ADHESION_TO_VASCULAR_ENDOTHELIAL_CELL	GOBP_LEUKOCYTE_ADHESION_TO_VASCULAR_ENDOTHELIAL_CELL	2.91233e-06	0.00121008	0.000174262	ICAM1/IL6/ETS1/SELE	4	Skin_Sun_Exposed_Lower_leg	rs34238187
GOBP_CELLULAR_RESPONSE_TO_CORTICOSTEROID_STIMULUS	GOBP_CELLULAR_RESPONSE_TO_CORTICOSTEROID_STIMULUS	4.45395e-06	0.00148049	0.000258376	ICAM1/ZFP36/STC1/ZFP36L2	4	Skin_Sun_Exposed_Lower_leg	rs34238187
KEGG_JAK_STAT_SIGNALING_PATHWAY	KEGG_JAK_STAT_SIGNALING_PATHWAY	9.54083e-06	0.00264281	0.000490473	OSMR/SOCS3/IL6/SPRED2/SPRY1	5	Skin_Sun_Exposed_Lower_leg	rs34238187
REACTOME_INTERLEUKIN_6_FAMILY_SIGNALING	REACTOME_INTERLEUKIN_6_FAMILY_SIGNALING	1.11954e-05	0.00265811	0.000557405	OSMR/SOCS3/IL6	3	Skin_Sun_Exposed_Lower_leg	rs34238187
GOBP_REGULATION_OF_EPITHELIAL_CELL_MIGRATION	GOBP_REGULATION_OF_EPITHELIAL_CELL_MIGRATION	1.57597e-05	0.00327408	0.00072738	STC1/MAP4K4/ETS1/SP100/NRP2/GADD45A	6	Skin_Sun_Exposed_Lower_leg	rs34238187
GOBP_INTERFERON_GAMMA_MEDIATED_SIGNALING_PATHWAY	GOBP_INTERFERON_GAMMA_MEDIATED_SIGNALING_PATHWAY	2.34001e-05	0.00423704	0.00093905	ICAM1/SOCS3/SP100/GBP2	4	Skin_Sun_Exposed_Lower_leg	rs34238187
REACTOME_INTERFERON_GAMMA_SIGNALING	REACTOME_INTERFERON_GAMMA_SIGNALING	2.54936e-05	0.00423704	0.00093905	ICAM1/SOCS3/SP100/GBP2	4	Skin_Sun_Exposed_Lower_leg	rs34238187
GOBP_RESPONSE_TO_INTERFERON_GAMMA	GOBP_RESPONSE_TO_INTERFERON_GAMMA	2.95288e-05	0.00425199	0.00093905	ICAM1/SOCS3/SP100/IFITM1/GBP2	5	Skin_Sun_Exposed_Lower_leg	rs34238187
GOBP_RESPONSE_TO_STEROID_HORMONE	GOBP_RESPONSE_TO_STEROID_HORMONE	3.07003e-05	0.00425199	0.00093905	ICAM1/ZFP36/IL6/STC1/ZFP36L2/HSD3B1	6	Skin_Sun_Exposed_Lower_leg	rs34238187
REACTOME_INTERFERON_SIGNALING	REACTOME_INTERFERON_SIGNALING	3.49114e-05	0.00434266	0.000989912	ICAM1/SOCS3/SP100/IFITM1/GBP2	5	Skin_Sun_Exposed_Lower_leg	rs34238187
GOBP_RESPONSE_TO_INTERLEUKIN_1	GOBP_RESPONSE_TO_INTERLEUKIN_1	3.65808e-05	0.00434266	0.00102548	ICAM1/IL6/ETS1/SELE/GBP2	5	Skin_Sun_Exposed_Lower_leg	rs34238187
GOBP_TISSUE_MIGRATION	GOBP_TISSUE_MIGRATION	5.37236e-05	0.00595257	0.00146424	STC1/MAP4K4/ETS1/SP100/NRP2/GADD45A	6	Skin_Sun_Exposed_Lower_leg	rs34238187
GOBP_REGULATION_OF_ENDOTHELIAL_CELL_MIGRATION	GOBP_REGULATION_OF_ENDOTHELIAL_CELL_MIGRATION	6.4442e-05	0.00669391	0.00169077	STC1/ETS1/SP100/NRP2/GADD45A	5	Skin_Sun_Exposed_Lower_leg	rs34238187
GOBP_RESPONSE_TO_OXYGEN_LEVELS	GOBP_RESPONSE_TO_OXYGEN_LEVELS	7.10533e-05	0.0069465	0.00182635	ICAM1/STC1/ETS1/PKLR/ARNT/SOD2	6	Skin_Sun_Exposed_Lower_leg	rs34238187
GOBP_REGULATION_OF_ERYTHROCYTE_DIFFERENTIATION	GOBP_REGULATION_OF_ERYTHROCYTE_DIFFERENTIATION	8.70505e-05	0.00803766	0.00221058	ZFP36/ETS1/ARNT	3	Skin_Sun_Exposed_Lower_leg	rs34238187
GOBP_RESPONSE_TO_INTERLEUKIN_6	GOBP_RESPONSE_TO_INTERLEUKIN_6	0.000104814	0.00916847	0.00260927	ICAM1/SOCS3/IL6	3	Skin_Sun_Exposed_Lower_leg	rs34238187
GOBP_MYELOID_CELL_HOMEOSTASIS	GOBP_MYELOID_CELL_HOMEOSTASIS	0.0001437	0.011234	0.00334774	ZFP36/IL6/ETS1/ARNT	4	Skin_Sun_Exposed_Lower_leg	rs34238187
GOBP_ENDOTHELIAL_CELL_MIGRATION	GOBP_ENDOTHELIAL_CELL_MIGRATION	0.00015347	0.011234	0.0034859	STC1/ETS1/SP100/NRP2/GADD45A	5	Skin_Sun_Exposed_Lower_leg	rs34238187
GOBP_RESPONSE_TO_INSULIN	GOBP_RESPONSE_TO_INSULIN	0.00015347	0.011234	0.0034859	ICAM1/SOCS3/PKLR/SLC39A14/KBTBD2	5	Skin_Sun_Exposed_Lower_leg	rs34238187
GOBP_RESPONSE_TO_FIBROBLAST_GROWTH_FACTOR	GOBP_RESPONSE_TO_FIBROBLAST_GROWTH_FACTOR	0.000155464	0.011234	0.0034859	ZFP36/ZFP36L2/SPRED2/SPRY1	4	Skin_Sun_Exposed_Lower_leg	rs34238187
REACTOME_INTERLEUKIN_6_SIGNALING	REACTOME_INTERLEUKIN_6_SIGNALING	0.000175803	0.0118287	0.00379397	SOCS3/IL6	2	Skin_Sun_Exposed_Lower_leg	rs34238187
GOBP_MESENCHYME_DEVELOPMENT	GOBP_MESENCHYME_DEVELOPMENT	0.000177929	0.0118287	0.0038138	IL6/SPRED2/SPRY1/BASP1/NRP2	5	Skin_Sun_Exposed_Lower_leg	rs34238187
GOBP_NEGATIVE_REGULATION_OF_TRANSFERASE_ACTIVITY	GOBP_NEGATIVE_REGULATION_OF_TRANSFERASE_ACTIVITY	0.000205259	0.0131208	0.00431191	ZFP36/SOCS3/SPRED2/SPRY1/GADD45A	5	Skin_Sun_Exposed_Lower_leg	rs34238187
GOBP_AMEBOIDAL_TYPE_CELL_MIGRATION	GOBP_AMEBOIDAL_TYPE_CELL_MIGRATION	0.000220395	0.0135665	0.00458419	STC1/MAP4K4/ETS1/SP100/NRP2/GADD45A	6	Skin_Sun_Exposed_Lower_leg	rs34238187
GOBP_RESPONSE_TO_EXTRACELLULAR_STIMULUS	GOBP_RESPONSE_TO_EXTRACELLULAR_STIMULUS	0.000230569	0.0136859	0.00476446	ICAM1/ZFP36/STC1/IFI16/PKLR/SOD2	6	Skin_Sun_Exposed_Lower_leg	rs34238187
GOBP_REGULATION_OF_MAP_KINASE_ACTIVITY	GOBP_REGULATION_OF_MAP_KINASE_ACTIVITY	0.000242883	0.0139197	0.00497019	FLT1/SPRED2/SPRY1/BIRC7/GADD45A	5	Skin_Sun_Exposed_Lower_leg	rs34238187
GOBP_RESPONSE_TO_TUMOR_NECROSIS_FACTOR	GOBP_RESPONSE_TO_TUMOR_NECROSIS_FACTOR	0.000289683	0.0160484	0.00569189	ICAM1/ZFP36/ZFP36L2/SELE/GBP2	5	Skin_Sun_Exposed_Lower_leg	rs34238187
REACTOME_INTERFERON_ALPHA_BETA_SIGNALING	REACTOME_INTERFERON_ALPHA_BETA_SIGNALING	0.000322829	0.0173078	0.00612548	SOCS3/IFITM1/GBP2	3	Skin_Sun_Exposed_Lower_leg	rs34238187
GOBP_LENS_DEVELOPMENT_IN_CAMERA_TYPE_EYE	GOBP_LENS_DEVELOPMENT_IN_CAMERA_TYPE_EYE	0.000377724	0.0186779	0.00612548	SPRED2/SPRY1/BIRC7	3	Skin_Sun_Exposed_Lower_leg	rs34238187
GOBP_REGULATION_OF_VASCULATURE_DEVELOPMENT	GOBP_REGULATION_OF_VASCULATURE_DEVELOPMENT	0.000392916	0.0186779	0.00612548	IL6/FLT1/ETS1/SP100/GADD45A	5	Skin_Sun_Exposed_Lower_leg	rs34238187
GOBP_RESPONSE_TO_MOLECULE_OF_BACTERIAL_ORIGIN	GOBP_RESPONSE_TO_MOLECULE_OF_BACTERIAL_ORIGIN	0.000419822	0.0186779	0.00612548	ICAM1/ZFP36/IL6/SELE/SOD2	5	Skin_Sun_Exposed_Lower_leg	rs34238187
GOBP_RESPONSE_TO_LEUKEMIA_INHIBITORY_FACTOR	GOBP_RESPONSE_TO_LEUKEMIA_INHIBITORY_FACTOR	0.000422604	0.0186779	0.00612548	ICAM1/SOCS3/NRP2	3	Skin_Sun_Exposed_Lower_leg	rs34238187
GOBP_3_UTR_MEDIATED_MRNA_DESTABILIZATION	GOBP_3_UTR_MEDIATED_MRNA_DESTABILIZATION	0.000431667	0.0186779	0.00612548	ZFP36/ZFP36L2	2	Skin_Sun_Exposed_Lower_leg	rs34238187
GOBP_REGULATION_OF_EXTRACELLULAR_MATRIX_DISASSEMBLY	GOBP_REGULATION_OF_EXTRACELLULAR_MATRIX_DISASSEMBLY	0.000431667	0.0186779	0.00612548	IL6/ETS1	2	Skin_Sun_Exposed_Lower_leg	rs34238187
GOBP_REGULATION_OF_NUCLEAR_TRANSCRIBED_MRNA_CATABOLIC_PROCESS_DEADENYLATION_DEPENDENT_DECAY	GOBP_REGULATION_OF_NUCLEAR_TRANSCRIBED_MRNA_CATABOLIC_PROCESS_DEADENYLATION_DEPENDENT_DECAY	0.000431667	0.0186779	0.00612548	ZFP36/ZFP36L2	2	Skin_Sun_Exposed_Lower_leg	rs34238187
GOBP_EXTRACELLULAR_MATRIX_DISASSEMBLY	GOBP_EXTRACELLULAR_MATRIX_DISASSEMBLY	0.00043829	0.0186779	0.00612548	IL6/ETS1/ADAMTS4	3	Skin_Sun_Exposed_Lower_leg	rs34238187
GOBP_RESPONSE_TO_MONOSACCHARIDE	GOBP_RESPONSE_TO_MONOSACCHARIDE	0.000452514	0.0188019	0.00612548	ICAM1/PKLR/SLC39A14/SOD2	4	Skin_Sun_Exposed_Lower_leg	rs34238187
GOBP_CELLULAR_RESPONSE_TO_STEROID_HORMONE_STIMULUS	GOBP_CELLULAR_RESPONSE_TO_STEROID_HORMONE_STIMULUS	0.000497481	0.0201662	0.00622901	ICAM1/ZFP36/STC1/ZFP36L2	4	Skin_Sun_Exposed_Lower_leg	rs34238187
GOBP_BLASTODERM_SEGMENTATION	GOBP_BLASTODERM_SEGMENTATION	0.000541488	0.0209332	0.00663677	BASP1/NRP2	2	Skin_Sun_Exposed_Lower_leg	rs34238187
GOBP_REGULATION_OF_INFLAMMATORY_RESPONSE	GOBP_REGULATION_OF_INFLAMMATORY_RESPONSE	0.000541592	0.0209332	0.00663677	OSMR/SOCS3/IL6/ETS1/SELE	5	Skin_Sun_Exposed_Lower_leg	rs34238187
GOBP_NEGATIVE_REGULATION_OF_VIRAL_PROCESS	GOBP_NEGATIVE_REGULATION_OF_VIRAL_PROCESS	0.000577369	0.0218088	0.00700728	ZFP36/IFI16/IFITM1	3	Skin_Sun_Exposed_Lower_leg	rs34238187
GOBP_HYPOTHALAMUS_DEVELOPMENT	GOBP_HYPOTHALAMUS_DEVELOPMENT	0.000600949	0.0221951	0.00726558	ETS1/NRP2	2	Skin_Sun_Exposed_Lower_leg	rs34238187
GOBP_REGULATION_OF_EPITHELIAL_CELL_APOPTOTIC_PROCESS	GOBP_REGULATION_OF_EPITHELIAL_CELL_APOPTOTIC_PROCESS	0.000677096	0.0244638	0.00807808	ICAM1/ZFP36/IL6	3	Skin_Sun_Exposed_Lower_leg	rs34238187
GOBP_RESPONSE_TO_CARBOHYDRATE	GOBP_RESPONSE_TO_CARBOHYDRATE	0.000709504	0.0249253	0.00841709	ICAM1/PKLR/SLC39A14/SOD2	4	Skin_Sun_Exposed_Lower_leg	rs34238187
GOBP_VASCULAR_ENDOTHELIAL_GROWTH_FACTOR_RECEPTOR_SIGNALING_PATHWAY	GOBP_VASCULAR_ENDOTHELIAL_GROWTH_FACTOR_RECEPTOR_SIGNALING_PATHWAY	0.000719864	0.0249253	0.00850806	FLT1/ARNT/NRP2	3	Skin_Sun_Exposed_Lower_leg	rs34238187
GOBP_LIMBIC_SYSTEM_DEVELOPMENT	GOBP_LIMBIC_SYSTEM_DEVELOPMENT	0.000764316	0.0259244	0.00890036	ETS1/HSD3B1/NRP2	3	Skin_Sun_Exposed_Lower_leg	rs34238187
GOBP_REGULATION_OF_EPITHELIAL_TO_MESENCHYMAL_TRANSITION	GOBP_REGULATION_OF_EPITHELIAL_TO_MESENCHYMAL_TRANSITION	0.00081048	0.0261716	0.00933477	IL6/SPRED2/SPRY1	3	Skin_Sun_Exposed_Lower_leg	rs34238187
GOBP_POSITIVE_REGULATION_OF_REACTIVE_OXYGEN_SPECIES_METABOLIC_PROCESS	GOBP_POSITIVE_REGULATION_OF_REACTIVE_OXYGEN_SPECIES_METABOLIC_PROCESS	0.000834211	0.0261716	0.00952138	ICAM1/SOD2/GADD45A	3	Skin_Sun_Exposed_Lower_leg	rs34238187
GOBP_RESPONSE_TO_TYPE_I_INTERFERON	GOBP_RESPONSE_TO_TYPE_I_INTERFERON	0.000834211	0.0261716	0.00952138	SP100/IFITM1/GBP2	3	Skin_Sun_Exposed_Lower_leg	rs34238187
GOBP_MESENCHYMAL_CELL_DIFFERENTIATION	GOBP_MESENCHYMAL_CELL_DIFFERENTIATION	0.000836483	0.0261716	0.00953011	IL6/SPRED2/SPRY1/NRP2	4	Skin_Sun_Exposed_Lower_leg	rs34238187
GOMF_MRNA_3_UTR_AU_RICH_REGION_BINDING	GOMF_MRNA_3_UTR_AU_RICH_REGION_BINDING	0.000868879	0.0261716	0.00979333	ZFP36/ZFP36L2	2	Skin_Sun_Exposed_Lower_leg	rs34238187
GOBP_POSITIVE_REGULATION_OF_LEUKOCYTE_CELL_CELL_ADHESION	GOBP_POSITIVE_REGULATION_OF_LEUKOCYTE_CELL_CELL_ADHESION	0.000877508	0.0261716	0.00987299	ICAM1/IL6/ETS1/SELE	4	Skin_Sun_Exposed_Lower_leg	rs34238187
GOBP_REPRODUCTIVE_SYSTEM_DEVELOPMENT	GOBP_REPRODUCTIVE_SYSTEM_DEVELOPMENT	0.000881836	0.0261716	0.0098819	ICAM1/SOCS3/STC1/ARNT/BASP1	5	Skin_Sun_Exposed_Lower_leg	rs34238187
GOBP_SYNAPSE_ORGANIZATION	GOBP_SYNAPSE_ORGANIZATION	0.000920998	0.0268544	0.0101811	PCDHGC5/PCDH17/NLGN4X/RAB29/NRP2	5	Skin_Sun_Exposed_Lower_leg	rs34238187
GOBP_DNA_DAMAGE_RESPONSE_SIGNAL_TRANSDUCTION_BY_P53_CLASS_MEDIATOR	GOBP_DNA_DAMAGE_RESPONSE_SIGNAL_TRANSDUCTION_BY_P53_CLASS_MEDIATOR	0.000959489	0.0274943	0.0104423	SPRED2/SP100/GADD45A	3	Skin_Sun_Exposed_Lower_leg	rs34238187
GOBP_ACUTE_INFLAMMATORY_RESPONSE	GOBP_ACUTE_INFLAMMATORY_RESPONSE	0.000985892	0.0277721	0.0106929	OSMR/ICAM1/IL6	3	Skin_Sun_Exposed_Lower_leg	rs34238187
GOBP_POSITIVE_REGULATION_OF_CELL_ADHESION	GOBP_POSITIVE_REGULATION_OF_CELL_ADHESION	0.00105726	0.0282323	0.0113309	ICAM1/IL6/MAP4K4/ETS1/SELE	5	Skin_Sun_Exposed_Lower_leg	rs34238187
GOBP_REGULATION_OF_RECEPTOR_SIGNALING_PATHWAY_VIA_STAT	GOBP_REGULATION_OF_RECEPTOR_SIGNALING_PATHWAY_VIA_STAT	0.00106785	0.0282323	0.0113865	SOCS3/IL6/GADD45A	3	Skin_Sun_Exposed_Lower_leg	rs34238187
GOBP_EPITHELIAL_CELL_PROLIFERATION	GOBP_EPITHELIAL_CELL_PROLIFERATION	0.00109073	0.0282323	0.0115913	ZFP36/IL6/FLT1/ARNT/NRP2	5	Skin_Sun_Exposed_Lower_leg	rs34238187
REACTOME_INTERLEUKIN_4_AND_INTERLEUKIN_13_SIGNALING	REACTOME_INTERLEUKIN_4_AND_INTERLEUKIN_13_SIGNALING	0.00109609	0.0282323	0.0116288	ICAM1/SOCS3/IL6	3	Skin_Sun_Exposed_Lower_leg	rs34238187
GOBP_POSITIVE_REGULATION_OF_ACUTE_INFLAMMATORY_RESPONSE	GOBP_POSITIVE_REGULATION_OF_ACUTE_INFLAMMATORY_RESPONSE	0.00110111	0.0282323	0.0116362	OSMR/IL6	2	Skin_Sun_Exposed_Lower_leg	rs34238187
GOBP_HOMEOSTASIS_OF_NUMBER_OF_CELLS	GOBP_HOMEOSTASIS_OF_NUMBER_OF_CELLS	0.00110415	0.0282323	0.0116362	ZFP36/IL6/ETS1/ARNT	4	Skin_Sun_Exposed_Lower_leg	rs34238187
GOBP_RESPONSE_TO_PEPTIDE_HORMONE	GOBP_RESPONSE_TO_PEPTIDE_HORMONE	0.00117186	0.0289488	0.0122477	ICAM1/SOCS3/PKLR/SLC39A14/KBTBD2	5	Skin_Sun_Exposed_Lower_leg	rs34238187
GOBP_NEGATIVE_REGULATION_OF_EPITHELIAL_CELL_MIGRATION	GOBP_NEGATIVE_REGULATION_OF_EPITHELIAL_CELL_MIGRATION	0.00118365	0.0289488	0.0122776	STC1/SP100/GADD45A	3	Skin_Sun_Exposed_Lower_leg	rs34238187
GOBP_POSITIVE_REGULATION_OF_VASCULAR_ENDOTHELIAL_GROWTH_FACTOR_PRODUCTION	GOBP_POSITIVE_REGULATION_OF_VASCULAR_ENDOTHELIAL_GROWTH_FACTOR_PRODUCTION	0.00118443	0.0289488	0.0122776	IL6/ARNT	2	Skin_Sun_Exposed_Lower_leg	rs34238187
GOBP_EPITHELIAL_CELL_APOPTOTIC_PROCESS	GOBP_EPITHELIAL_CELL_APOPTOTIC_PROCESS	0.0012444	0.0299738	0.0127117	ICAM1/ZFP36/IL6	3	Skin_Sun_Exposed_Lower_leg	rs34238187
GOBP_SIGNAL_TRANSDUCTION_BY_P53_CLASS_MEDIATOR	GOBP_SIGNAL_TRANSDUCTION_BY_P53_CLASS_MEDIATOR	0.00135014	0.0309598	0.0136702	SPRED2/IFI16/SP100/GADD45A	4	Skin_Sun_Exposed_Lower_leg	rs34238187
GOBP_INTERLEUKIN_6_MEDIATED_SIGNALING_PATHWAY	GOBP_INTERLEUKIN_6_MEDIATED_SIGNALING_PATHWAY	0.00135985	0.0309598	0.0136702	SOCS3/IL6	2	Skin_Sun_Exposed_Lower_leg	rs34238187
GOBP_POSITIVE_REGULATION_OF_POSTTRANSCRIPTIONAL_GENE_SILENCING	GOBP_POSITIVE_REGULATION_OF_POSTTRANSCRIPTIONAL_GENE_SILENCING	0.00135985	0.0309598	0.0136702	ZFP36/IL6	2	Skin_Sun_Exposed_Lower_leg	rs34238187
GOBP_RESPONSE_TO_INTERFERON_BETA	GOBP_RESPONSE_TO_INTERFERON_BETA	0.00135985	0.0309598	0.0136702	IFI16/IFITM1	2	Skin_Sun_Exposed_Lower_leg	rs34238187
GOBP_ERYTHROCYTE_HOMEOSTASIS	GOBP_ERYTHROCYTE_HOMEOSTASIS	0.00140478	0.0315506	0.0140326	ZFP36/ETS1/ARNT	3	Skin_Sun_Exposed_Lower_leg	rs34238187
GOBP_NEGATIVE_REGULATION_OF_KINASE_ACTIVITY	GOBP_NEGATIVE_REGULATION_OF_KINASE_ACTIVITY	0.00142691	0.0316203	0.0142312	SOCS3/SPRED2/SPRY1/GADD45A	4	Skin_Sun_Exposed_Lower_leg	rs34238187
GOBP_LENS_FIBER_CELL_DIFFERENTIATION	GOBP_LENS_FIBER_CELL_DIFFERENTIATION	0.00145193	0.0317514	0.014345	SPRED2/SPRY1	2	Skin_Sun_Exposed_Lower_leg	rs34238187
GOBP_MONOSACCHARIDE_METABOLIC_PROCESS	GOBP_MONOSACCHARIDE_METABOLIC_PROCESS	0.0015271	0.0321536	0.0148784	SLC2A3/PKLR/SLC39A14/KBTBD2	4	Skin_Sun_Exposed_Lower_leg	rs34238187
REACTOME_SIGNALING_BY_INTERLEUKINS	REACTOME_SIGNALING_BY_INTERLEUKINS	0.00154181	0.0321536	0.0148956	OSMR/ICAM1/SOCS3/IL6/SOD2	5	Skin_Sun_Exposed_Lower_leg	rs34238187
GOBP_POSITIVE_REGULATION_OF_ERYTHROCYTE_DIFFERENTIATION	GOBP_POSITIVE_REGULATION_OF_ERYTHROCYTE_DIFFERENTIATION	0.00154692	0.0321536	0.0148956	ETS1/ARNT	2	Skin_Sun_Exposed_Lower_leg	rs34238187
GOBP_CELL_CELL_ADHESION_VIA_PLASMA_MEMBRANE_ADHESION_MOLECULES	GOBP_CELL_CELL_ADHESION_VIA_PLASMA_MEMBRANE_ADHESION_MOLECULES	0.00154771	0.0321536	0.0148956	ICAM1/PCDHGC5/SELE/PCDH17	4	Skin_Sun_Exposed_Lower_leg	rs34238187
GOBP_POSITIVE_REGULATION_OF_CELL_CELL_ADHESION	GOBP_POSITIVE_REGULATION_OF_CELL_CELL_ADHESION	0.0016107	0.0326462	0.015408	ICAM1/IL6/ETS1/SELE	4	Skin_Sun_Exposed_Lower_leg	rs34238187
GOBP_STRESS_ACTIVATED_PROTEIN_KINASE_SIGNALING_CASCADE	GOBP_STRESS_ACTIVATED_PROTEIN_KINASE_SIGNALING_CASCADE	0.0016107	0.0326462	0.015408	ZFP36/MAP4K4/BIRC7/GADD45A	4	Skin_Sun_Exposed_Lower_leg	rs34238187
GOBP_VIRAL_GENOME_REPLICATION	GOBP_VIRAL_GENOME_REPLICATION	0.00168738	0.0337883	0.0159964	IFI16/IFITM1/RAB29	3	Skin_Sun_Exposed_Lower_leg	rs34238187
GOBP_REGULATION_OF_CELLULAR_EXTRAVASATION	GOBP_REGULATION_OF_CELLULAR_EXTRAVASATION	0.00174555	0.0344751	0.0164247	ICAM1/SELE	2	Skin_Sun_Exposed_Lower_leg	rs34238187
GOBP_SIGNAL_TRANSDUCTION_IN_RESPONSE_TO_DNA_DAMAGE	GOBP_SIGNAL_TRANSDUCTION_IN_RESPONSE_TO_DNA_DAMAGE	0.00176317	0.0344751	0.0165167	SPRED2/SP100/GADD45A	3	Skin_Sun_Exposed_Lower_leg	rs34238187
GOBP_POSITIVE_REGULATION_OF_INFLAMMATORY_RESPONSE	GOBP_POSITIVE_REGULATION_OF_INFLAMMATORY_RESPONSE	0.00184105	0.0351704	0.0171447	OSMR/IL6/ETS1	3	Skin_Sun_Exposed_Lower_leg	rs34238187
KEGG_CELL_ADHESION_MOLECULES_CAMS	KEGG_CELL_ADHESION_MOLECULES_CAMS	0.00184105	0.0351704	0.0171447	ICAM1/SELE/NLGN4X	3	Skin_Sun_Exposed_Lower_leg	rs34238187
GOBP_PLACENTA_DEVELOPMENT	GOBP_PLACENTA_DEVELOPMENT	0.00192105	0.0354412	0.0177071	SOCS3/STC1/ARNT	3	Skin_Sun_Exposed_Lower_leg	rs34238187
GOBP_RESPONSE_TO_HYDROGEN_PEROXIDE	GOBP_RESPONSE_TO_HYDROGEN_PEROXIDE	0.00192105	0.0354412	0.0177071	IL6/ETS1/SOD2	3	Skin_Sun_Exposed_Lower_leg	rs34238187
GOBP_RNA_DESTABILIZATION	GOBP_RNA_DESTABILIZATION	0.00195567	0.0354412	0.017849	ZFP36/ZFP36L2	2	Skin_Sun_Exposed_Lower_leg	rs34238187
GOBP_REGULATION_OF_FAT_CELL_DIFFERENTIATION	GOBP_REGULATION_OF_FAT_CELL_DIFFERENTIATION	0.00196185	0.0354412	0.017849	ZFP36/IL6/ZFP36L2	3	Skin_Sun_Exposed_Lower_leg	rs34238187
GOMF_CYTOKINE_BINDING	GOMF_CYTOKINE_BINDING	0.00196185	0.0354412	0.017849	OSMR/ZFP36/NRP2	3	Skin_Sun_Exposed_Lower_leg	rs34238187
GOMF_GROWTH_FACTOR_BINDING	GOMF_GROWTH_FACTOR_BINDING	0.00200318	0.0355227	0.0181484	OSMR/FLT1/NRP2	3	Skin_Sun_Exposed_Lower_leg	rs34238187
GOBP_REGULATION_OF_PROTEIN_SERINE_THREONINE_KINASE_ACTIVITY	GOBP_REGULATION_OF_PROTEIN_SERINE_THREONINE_KINASE_ACTIVITY	0.0020091	0.0355227	0.0181484	FLT1/SPRED2/SPRY1/BIRC7/GADD45A	5	Skin_Sun_Exposed_Lower_leg	rs34238187
GOBP_RESPONSE_TO_IONIZING_RADIATION	GOBP_RESPONSE_TO_IONIZING_RADIATION	0.002218	0.0388034	0.0195331	ICAM1/IFI16/GADD45A	3	Skin_Sun_Exposed_Lower_leg	rs34238187
GOBP_NEGATIVE_REGULATION_OF_PROTEIN_SERINE_THREONINE_KINASE_ACTIVITY	GOBP_NEGATIVE_REGULATION_OF_PROTEIN_SERINE_THREONINE_KINASE_ACTIVITY	0.0023535	0.0407449	0.0203857	SPRED2/SPRY1/GADD45A	3	Skin_Sun_Exposed_Lower_leg	rs34238187
GOBP_NEGATIVE_REGULATION_OF_EPITHELIAL_TO_MESENCHYMAL_TRANSITION	GOBP_NEGATIVE_REGULATION_OF_EPITHELIAL_TO_MESENCHYMAL_TRANSITION	0.00241001	0.0412932	0.0206769	SPRED2/SPRY1	2	Skin_Sun_Exposed_Lower_leg	rs34238187
GOBP_CAMERA_TYPE_EYE_DEVELOPMENT	GOBP_CAMERA_TYPE_EYE_DEVELOPMENT	0.00245409	0.0416194	0.0209981	FLT1/SPRED2/SPRY1/BIRC7	4	Skin_Sun_Exposed_Lower_leg	rs34238187
GOBP_ERK1_AND_ERK2_CASCADE	GOBP_ERK1_AND_ERK2_CASCADE	0.00271996	0.0450808	0.0230237	ICAM1/ZFP36L2/SPRED2/SPRY1	4	Skin_Sun_Exposed_Lower_leg	rs34238187
GOBP_NEGATIVE_REGULATION_OF_ION_TRANSPORT	GOBP_NEGATIVE_REGULATION_OF_ION_TRANSPORT	0.00271996	0.0450808	0.0230237	ICAM1/PXK/STC1/SP100	4	Skin_Sun_Exposed_Lower_leg	rs34238187
GOBP_EPITHELIAL_TO_MESENCHYMAL_TRANSITION	GOBP_EPITHELIAL_TO_MESENCHYMAL_TRANSITION	0.00273957	0.0450808	0.0231587	IL6/SPRED2/SPRY1	3	Skin_Sun_Exposed_Lower_leg	rs34238187
GOBP_REGULATION_OF_EPITHELIAL_CELL_DIFFERENTIATION	GOBP_REGULATION_OF_EPITHELIAL_CELL_DIFFERENTIATION	0.0028938	0.0471519	0.0240784	ZFP36/SPRED2/SPRY1	3	Skin_Sun_Exposed_Lower_leg	rs34238187
GOBP_NEURON_MATURATION	GOBP_NEURON_MATURATION	0.00304105	0.0487938	0.0249081	B4GALT5/RND1	2	Skin_Sun_Exposed_Lower_leg	rs34238187
GOBP_CELLULAR_RESPONSE_TO_REACTIVE_OXYGEN_SPECIES	GOBP_CELLULAR_RESPONSE_TO_REACTIVE_OXYGEN_SPECIES	0.00305328	0.0487938	0.0249115	IL6/ETS1/SOD2	3	Skin_Sun_Exposed_Lower_leg	rs34238187
GOBP_REGULATION_OF_PHOSPHOLIPASE_C_ACTIVITY	GOBP_REGULATION_OF_PHOSPHOLIPASE_C_ACTIVITY	0.00317557	0.0493252	0.0255792	FLT1/SELE	2	Skin_Sun_Exposed_Lower_leg	rs34238187
GOBP_RESPONSE_TO_EPIDERMAL_GROWTH_FACTOR	GOBP_RESPONSE_TO_EPIDERMAL_GROWTH_FACTOR	0.00317557	0.0493252	0.0255792	ZFP36/ZFP36L2	2	Skin_Sun_Exposed_Lower_leg	rs34238187
REACTOME_INTERLEUKIN_10_SIGNALING	REACTOME_INTERLEUKIN_10_SIGNALING	0.00317557	0.0493252	0.0255792	ICAM1/IL6	2	Skin_Sun_Exposed_Lower_leg	rs34238187
GOBP_HETEROPHILIC_CELL_CELL_ADHESION_VIA_PLASMA_MEMBRANE_CELL_ADHESION_MOLECULES	GOBP_HETEROPHILIC_CELL_CELL_ADHESION_VIA_PLASMA_MEMBRANE_CELL_ADHESION_MOLECULES	0.00331284	0.0494709	0.0262831	ICAM1/SELE	2	Skin_Sun_Exposed_Lower_leg	rs34238187
GOBP_NEGATIVE_REGULATION_OF_EPITHELIAL_CELL_DIFFERENTIATION	GOBP_NEGATIVE_REGULATION_OF_EPITHELIAL_CELL_DIFFERENTIATION	0.00331284	0.0494709	0.0262831	SPRED2/SPRY1	2	Skin_Sun_Exposed_Lower_leg	rs34238187
GOBP_REGULATION_OF_EXTRACELLULAR_MATRIX_ORGANIZATION	GOBP_REGULATION_OF_EXTRACELLULAR_MATRIX_ORGANIZATION	0.00331284	0.0494709	0.0262831	IL6/ETS1	2	Skin_Sun_Exposed_Lower_leg	rs34238187
KEGG_TYPE_II_DIABETES_MELLITUS	KEGG_TYPE_II_DIABETES_MELLITUS	0.00331284	0.0494709	0.0262831	SOCS3/PKLR	2	Skin_Sun_Exposed_Lower_leg	rs34238187
GOBP_RAS_PROTEIN_SIGNAL_TRANSDUCTION	GOBP_RAS_PROTEIN_SIGNAL_TRANSDUCTION	0.00334489	0.0494709	0.0264048	MAP4K4/SPRY1/DENND4A/KIAA0355	4	Skin_Sun_Exposed_Lower_leg	rs34238187
GOBP_RESPONSE_TO_NUTRIENT	GOBP_RESPONSE_TO_NUTRIENT	0.00338824	0.0494709	0.0266804	STC1/PKLR/SOD2	3	Skin_Sun_Exposed_Lower_leg	rs34238187
GOBP_ORGAN_GROWTH	GOBP_ORGAN_GROWTH	0.00344616	0.0494709	0.0270544	STC1/NLGN4X/BASP1	3	Skin_Sun_Exposed_Lower_leg	rs34238187
GOBP_REGULATION_OF_ACUTE_INFLAMMATORY_RESPONSE	GOBP_REGULATION_OF_ACUTE_INFLAMMATORY_RESPONSE	0.00345284	0.0494709	0.0270544	OSMR/IL6	2	Skin_Sun_Exposed_Lower_leg	rs34238187
GOBP_VASCULAR_ENDOTHELIAL_GROWTH_FACTOR_SIGNALING_PATHWAY	GOBP_VASCULAR_ENDOTHELIAL_GROWTH_FACTOR_SIGNALING_PATHWAY	0.00345284	0.0494709	0.0270544	FLT1/NRP2	2	Skin_Sun_Exposed_Lower_leg	rs34238187
GOMF_RAGE_RECEPTOR_BINDING	GOMF_RAGE_RECEPTOR_BINDING	7.71911e-06	0.00376693	0.00328265	S100A8/S100A12	2	Thyroid	rs34238187
GOBP_DEFENSE_RESPONSE_TO_FUNGUS	GOBP_DEFENSE_RESPONSE_TO_FUNGUS	0.000126185	0.0227909	0.00847292	S100A8/S100A12	2	Thyroid	rs34238187
GOBP_CELLULAR_RESPONSE_TO_CAMP	GOBP_CELLULAR_RESPONSE_TO_CAMP	0.000233836	0.0227909	0.011933	AQP9/KCNE1	2	Thyroid	rs34238187
GOBP_RESPONSE_TO_FUNGUS	GOBP_RESPONSE_TO_FUNGUS	0.000233836	0.0227909	0.011933	S100A8/S100A12	2	Thyroid	rs34238187
GOMF_POTASSIUM_CHANNEL_REGULATOR_ACTIVITY	GOMF_POTASSIUM_CHANNEL_REGULATOR_ACTIVITY	0.000233836	0.0227909	0.011933	KCNIP4/KCNE1	2	Thyroid	rs34238187
GOBP_CELL_CHEMOTAXIS	GOBP_CELL_CHEMOTAXIS	0.000280216	0.0227909	0.0127677	S100A8/ARRB2/S100A12	3	Thyroid	rs34238187
GOBP_REGULATION_OF_INFLAMMATORY_RESPONSE	GOBP_REGULATION_OF_INFLAMMATORY_RESPONSE	0.000477258	0.0306925	0.0173966	S100A8/C1QTNF12/S100A12	3	Thyroid	rs34238187
GOMF_CALCIUM_DEPENDENT_PROTEIN_BINDING	GOMF_CALCIUM_DEPENDENT_PROTEIN_BINDING	0.000545948	0.0306925	0.0193476	S100A8/S100A12	2	Thyroid	rs34238187
GOBP_RESPONSE_TO_CAMP	GOBP_RESPONSE_TO_CAMP	0.000718685	0.0306925	0.024647	AQP9/KCNE1	2	Thyroid	rs34238187
GOBP_REGULATION_OF_POTASSIUM_ION_TRANSPORT	GOBP_REGULATION_OF_POTASSIUM_ION_TRANSPORT	0.000830117	0.0306925	0.0249564	KCNIP4/KCNE1	2	Thyroid	rs34238187
GOBP_REGULATION_OF_DNA_BINDING_TRANSCRIPTION_FACTOR_ACTIVITY	GOBP_REGULATION_OF_DNA_BINDING_TRANSCRIPTION_FACTOR_ACTIVITY	0.000835866	0.0306925	0.0249564	S100A8/ARRB2/S100A12	3	Thyroid	rs34238187
GOBP_NEUTROPHIL_CHEMOTAXIS	GOBP_NEUTROPHIL_CHEMOTAXIS	0.000863392	0.0306925	0.0249564	S100A8/S100A12	2	Thyroid	rs34238187
REACTOME_TOLL_LIKE_RECEPTOR_TLR1_TLR2_CASCADE	REACTOME_TOLL_LIKE_RECEPTOR_TLR1_TLR2_CASCADE	0.000880267	0.0306925	0.0249564	S100A8/S100A12	2	Thyroid	rs34238187
GOMF_PASSIVE_TRANSMEMBRANE_TRANSPORTER_ACTIVITY	GOMF_PASSIVE_TRANSMEMBRANE_TRANSPORTER_ACTIVITY	0.00102792	0.0306925	0.0279023	AQP9/KCNIP4/KCNE1	3	Thyroid	rs34238187
GOMF_ION_CHANNEL_REGULATOR_ACTIVITY	GOMF_ION_CHANNEL_REGULATOR_ACTIVITY	0.00113317	0.0306925	0.028834	KCNIP4/KCNE1	2	Thyroid	rs34238187
GOMF_POTASSIUM_CHANNEL_ACTIVITY	GOMF_POTASSIUM_CHANNEL_ACTIVITY	0.00119138	0.0306925	0.028834	KCNIP4/KCNE1	2	Thyroid	rs34238187
GOBP_NEUTROPHIL_MIGRATION	GOBP_NEUTROPHIL_MIGRATION	0.00123098	0.0306925	0.028834	S100A8/S100A12	2	Thyroid	rs34238187
GOBP_GRANULOCYTE_CHEMOTAXIS	GOBP_GRANULOCYTE_CHEMOTAXIS	0.00125101	0.0306925	0.028834	S100A8/S100A12	2	Thyroid	rs34238187
REACTOME_CARDIAC_CONDUCTION	REACTOME_CARDIAC_CONDUCTION	0.00133271	0.0306925	0.028834	KCNIP4/KCNE1	2	Thyroid	rs34238187
GOBP_RESPONSE_TO_ORGANOPHOSPHORUS	GOBP_RESPONSE_TO_ORGANOPHOSPHORUS	0.00139562	0.0306925	0.028834	AQP9/KCNE1	2	Thyroid	rs34238187
GOBP_POSITIVE_REGULATION_OF_INFLAMMATORY_RESPONSE	GOBP_POSITIVE_REGULATION_OF_INFLAMMATORY_RESPONSE	0.00145993	0.0306925	0.028834	S100A8/S100A12	2	Thyroid	rs34238187
GOBP_ANTIMICROBIAL_HUMORAL_RESPONSE	GOBP_ANTIMICROBIAL_HUMORAL_RESPONSE	0.00166124	0.0306925	0.028834	S100A8/S100A12	2	Thyroid	rs34238187
GOBP_RESPONSE_TO_PURINE_CONTAINING_COMPOUND	GOBP_RESPONSE_TO_PURINE_CONTAINING_COMPOUND	0.00170768	0.0306925	0.028834	AQP9/KCNE1	2	Thyroid	rs34238187
GOMF_CHANNEL_REGULATOR_ACTIVITY	GOMF_CHANNEL_REGULATOR_ACTIVITY	0.00173113	0.0306925	0.028834	KCNIP4/KCNE1	2	Thyroid	rs34238187
GOBP_GRANULOCYTE_MIGRATION	GOBP_GRANULOCYTE_MIGRATION	0.00177849	0.0306925	0.028834	S100A8/S100A12	2	Thyroid	rs34238187
GOBP_CARBOHYDRATE_TRANSPORT	GOBP_CARBOHYDRATE_TRANSPORT	0.00182646	0.0306925	0.028834	AQP9/C1QTNF12	2	Thyroid	rs34238187
GOBP_CARDIAC_CONDUCTION	GOBP_CARDIAC_CONDUCTION	0.00182646	0.0306925	0.028834	KCNIP4/KCNE1	2	Thyroid	rs34238187
GOBP_POSITIVE_REGULATION_OF_PEPTIDE_SECRETION	GOBP_POSITIVE_REGULATION_OF_PEPTIDE_SECRETION	0.00187505	0.0306925	0.028834	S100A8/C1QTNF12	2	Thyroid	rs34238187
GOMF_POTASSIUM_ION_TRANSMEMBRANE_TRANSPORTER_ACTIVITY	GOMF_POTASSIUM_ION_TRANSMEMBRANE_TRANSPORTER_ACTIVITY	0.00189957	0.0306925	0.028834	KCNIP4/KCNE1	2	Thyroid	rs34238187
REACTOME_TOLL_LIKE_RECEPTOR_CASCADES	REACTOME_TOLL_LIKE_RECEPTOR_CASCADES	0.00197406	0.0306925	0.028834	S100A8/S100A12	2	Thyroid	rs34238187
GOBP_PLATELET_ACTIVATION	GOBP_PLATELET_ACTIVATION	0.00202449	0.0306925	0.028834	TREML1/ARRB2	2	Thyroid	rs34238187
GOBP_TOLL_LIKE_RECEPTOR_SIGNALING_PATHWAY	GOBP_TOLL_LIKE_RECEPTOR_SIGNALING_PATHWAY	0.00202449	0.0306925	0.028834	S100A8/ARRB2	2	Thyroid	rs34238187
GOBP_POSITIVE_REGULATION_OF_NF_KAPPAB_TRANSCRIPTION_FACTOR_ACTIVITY	GOBP_POSITIVE_REGULATION_OF_NF_KAPPAB_TRANSCRIPTION_FACTOR_ACTIVITY	0.00207552	0.0306925	0.028834	S100A8/S100A12	2	Thyroid	rs34238187
GOBP_POSITIVE_REGULATION_OF_PROTEIN_KINASE_B_SIGNALING	GOBP_POSITIVE_REGULATION_OF_PROTEIN_KINASE_B_SIGNALING	0.00250563	0.0357231	0.028834	C1QTNF12/ARRB2	2	Thyroid	rs34238187
GOBP_CELL_KILLING	GOBP_CELL_KILLING	0.00256211	0.0357231	0.028834	ARRB2/S100A12	2	Thyroid	rs34238187
REACTOME_IMMUNOREGULATORY_INTERACTIONS_BETWEEN_A_LYMPHOID_AND_A_NON_LYMPHOID_CELL	REACTOME_IMMUNOREGULATORY_INTERACTIONS_BETWEEN_A_LYMPHOID_AND_A_NON_LYMPHOID_CELL	0.00297422	0.0403172	0.028834	TREML1/LILRA1	2	Thyroid	rs34238187
REACTOME_MUSCLE_CONTRACTION	REACTOME_MUSCLE_CONTRACTION	0.00309733	0.0405781	0.028834	KCNIP4/KCNE1	2	Thyroid	rs34238187
GOMF_VOLTAGE_GATED_ION_CHANNEL_ACTIVITY	GOMF_VOLTAGE_GATED_ION_CHANNEL_ACTIVITY	0.00315977	0.0405781	0.028834	KCNIP4/KCNE1	2	Thyroid	rs34238187
GOBP_MULTICELLULAR_ORGANISMAL_SIGNALING	GOBP_MULTICELLULAR_ORGANISMAL_SIGNALING	0.00335063	0.041822	0.0292788	KCNIP4/KCNE1	2	Thyroid	rs34238187
GOBP_POSITIVE_REGULATION_OF_TRANSMEMBRANE_TRANSPORT	GOBP_POSITIVE_REGULATION_OF_TRANSMEMBRANE_TRANSPORT	0.00348082	0.041822	0.0298852	KCNE1/C1QTNF12	2	Thyroid	rs34238187
GOBP_PATTERN_RECOGNITION_RECEPTOR_SIGNALING_PATHWAY	GOBP_PATTERN_RECOGNITION_RECEPTOR_SIGNALING_PATHWAY	0.00351373	0.041822	0.0298852	S100A8/ARRB2	2	Thyroid	rs34238187
GOBP_MYELOID_LEUKOCYTE_MIGRATION	GOBP_MYELOID_LEUKOCYTE_MIGRATION	0.00381653	0.0420331	0.0312121	S100A8/S100A12	2	Thyroid	rs34238187
GOBP_LEUKOCYTE_CHEMOTAXIS	GOBP_LEUKOCYTE_CHEMOTAXIS	0.00409557	0.0420331	0.0326568	S100A8/S100A12	2	Thyroid	rs34238187
GOBP_REGULATION_OF_CYSTEINE_TYPE_ENDOPEPTIDASE_ACTIVITY	GOBP_REGULATION_OF_CYSTEINE_TYPE_ENDOPEPTIDASE_ACTIVITY	0.00427467	0.0420331	0.0332535	S100A8/ARRB2	2	Thyroid	rs34238187
GOBP_POTASSIUM_ION_TRANSPORT	GOBP_POTASSIUM_ION_TRANSPORT	0.00434732	0.0420331	0.0336137	KCNIP4/KCNE1	2	Thyroid	rs34238187
GOBP_NEGATIVE_REGULATION_OF_DEFENSE_RESPONSE	GOBP_NEGATIVE_REGULATION_OF_DEFENSE_RESPONSE	0.00449434	0.0420331	0.0343343	C1QTNF12/ARRB2	2	Thyroid	rs34238187
GOBP_REGULATION_OF_HEART_CONTRACTION	GOBP_REGULATION_OF_HEART_CONTRACTION	0.00483351	0.0420331	0.0356447	KCNIP4/KCNE1	2	Thyroid	rs34238187
GOBP_POSITIVE_REGULATION_OF_DNA_BINDING_TRANSCRIPTION_FACTOR_ACTIVITY	GOBP_POSITIVE_REGULATION_OF_DNA_BINDING_TRANSCRIPTION_FACTOR_ACTIVITY	0.00566955	0.0420331	0.0382706	S100A8/S100A12	2	Thyroid	rs34238187
GOBP_PROTEIN_KINASE_B_SIGNALING	GOBP_PROTEIN_KINASE_B_SIGNALING	0.00596199	0.0420331	0.0392413	C1QTNF12/ARRB2	2	Thyroid	rs34238187
GOBP_HEART_PROCESS	GOBP_HEART_PROCESS	0.00665593	0.0420331	0.0416118	KCNIP4/KCNE1	2	Thyroid	rs34238187
GOBP_REGULATION_OF_BLOOD_CIRCULATION	GOBP_REGULATION_OF_BLOOD_CIRCULATION	0.00670048	0.0420331	0.0416118	KCNIP4/KCNE1	2	Thyroid	rs34238187
GOBP_POSITIVE_REGULATION_OF_SECRETION	GOBP_POSITIVE_REGULATION_OF_SECRETION	0.00692525	0.0420331	0.0418728	S100A8/C1QTNF12	2	Thyroid	rs34238187
GOBP_REGULATION_OF_PEPTIDE_SECRETION	GOBP_REGULATION_OF_PEPTIDE_SECRETION	0.0075256	0.0420331	0.0428949	S100A8/C1QTNF12	2	Thyroid	rs34238187
GOBP_RECEPTOR_MEDIATED_ENDOCYTOSIS	GOBP_RECEPTOR_MEDIATED_ENDOCYTOSIS	0.00844406	0.0428043	0.0456401	LRP1B/ARRB2	2	Thyroid	rs34238187
GOMF_CATION_CHANNEL_ACTIVITY	GOMF_CATION_CHANNEL_ACTIVITY	0.00874412	0.0428043	0.0458403	KCNIP4/KCNE1	2	Thyroid	rs34238187
GOBP_DEFENSE_RESPONSE_TO_BACTERIUM	GOBP_DEFENSE_RESPONSE_TO_BACTERIUM	0.00894681	0.0428043	0.0458403	S100A8/S100A12	2	Thyroid	rs34238187
GOMF_GATED_CHANNEL_ACTIVITY	GOMF_GATED_CHANNEL_ACTIVITY	0.00894681	0.0428043	0.0458403	KCNIP4/KCNE1	2	Thyroid	rs34238187
GOBP_REGULATION_OF_CATION_TRANSMEMBRANE_TRANSPORT	GOBP_REGULATION_OF_CATION_TRANSMEMBRANE_TRANSPORT	0.00910021	0.042994	0.0462937	KCNIP4/KCNE1	2	Thyroid	rs34238187
GOBP_COAGULATION	GOBP_COAGULATION	0.00946275	0.042994	0.0466119	TREML1/ARRB2	2	Thyroid	rs34238187
GOBP_REGULATION_OF_APOPTOTIC_SIGNALING_PATHWAY	GOBP_REGULATION_OF_APOPTOTIC_SIGNALING_PATHWAY	0.00951507	0.042994	0.0466893	S100A8/ARRB2	2	Thyroid	rs34238187
GOBP_RESPONSE_TO_METAL_ION	GOBP_RESPONSE_TO_METAL_ION	0.0096728	0.0433058	0.04711	AQP9/S100A8	2	Thyroid	rs34238187
GOBP_POSITIVE_REGULATION_OF_DEFENSE_RESPONSE	GOBP_POSITIVE_REGULATION_OF_DEFENSE_RESPONSE	0.0100992	0.043321	0.0478836	S100A8/S100A12	2	Thyroid	rs34238187
GOBP_HUMORAL_IMMUNE_RESPONSE	GOBP_HUMORAL_IMMUNE_RESPONSE	0.0108652	0.0445565	0.0488029	S100A8/S100A12	2	Thyroid	rs34238187
GOBP_NEGATIVE_REGULATION_OF_RESPONSE_TO_EXTERNAL_STIMULUS	GOBP_NEGATIVE_REGULATION_OF_RESPONSE_TO_EXTERNAL_STIMULUS	0.0120613	0.0470873	0.0509525	C1QTNF12/ARRB2	2	Thyroid	rs34238187
GOBP_PEPTIDE_SECRETION	GOBP_PEPTIDE_SECRETION	0.0124724	0.0479253	0.0513294	S100A8/C1QTNF12	2	Thyroid	rs34238187
GOMF_METAL_ION_TRANSMEMBRANE_TRANSPORTER_ACTIVITY	GOMF_METAL_ION_TRANSMEMBRANE_TRANSPORTER_ACTIVITY	0.0139281	0.0488412	0.0532027	KCNIP4/KCNE1	2	Thyroid	rs34238187
GOBP_REGULATION_OF_MEMBRANE_POTENTIAL	GOBP_REGULATION_OF_MEMBRANE_POTENTIAL	0.0143032	0.0495032	0.0540004	KCNE1/ARRB2	2	Thyroid	rs34238187
GOBP_EPITHELIAL_CELL_MORPHOGENESIS	GOBP_EPITHELIAL_CELL_MORPHOGENESIS	0.000134442	0.0458446	0.0141892	SIPA1L3/CLDN3	2	Vagina	rs34238187
REACTOME_STRIATED_MUSCLE_CONTRACTION	REACTOME_STRIATED_MUSCLE_CONTRACTION	4.77184e-06	0.000280602	NA	TNNT2/ACTC1	2	Whole_Blood	rs34238187
GOBP_MUSCLE_FILAMENT_SLIDING	GOBP_MUSCLE_FILAMENT_SLIDING	5.61203e-06	0.000280602	NA	TNNT2/ACTC1	2	Whole_Blood	rs34238187
GOBP_CARDIAC_MUSCLE_TISSUE_MORPHOGENESIS	GOBP_CARDIAC_MUSCLE_TISSUE_MORPHOGENESIS	1.20802e-05	0.000323743	NA	TNNT2/ACTC1	2	Whole_Blood	rs34238187
GOBP_MYOFIBRIL_ASSEMBLY	GOBP_MYOFIBRIL_ASSEMBLY	1.29497e-05	0.000323743	NA	TNNT2/ACTC1	2	Whole_Blood	rs34238187
GOBP_MUSCLE_ORGAN_MORPHOGENESIS	GOBP_MUSCLE_ORGAN_MORPHOGENESIS	1.98807e-05	0.000367642	NA	TNNT2/ACTC1	2	Whole_Blood	rs34238187
KEGG_CARDIAC_MUSCLE_CONTRACTION	KEGG_CARDIAC_MUSCLE_CONTRACTION	2.3303e-05	0.000367642	NA	TNNT2/ACTC1	2	Whole_Blood	rs34238187
KEGG_HYPERTROPHIC_CARDIOMYOPATHY_HCM	KEGG_HYPERTROPHIC_CARDIOMYOPATHY_HCM	2.57349e-05	0.000367642	NA	TNNT2/ACTC1	2	Whole_Blood	rs34238187
KEGG_DILATED_CARDIOMYOPATHY	KEGG_DILATED_CARDIOMYOPATHY	3.02804e-05	0.000378505	NA	TNNT2/ACTC1	2	Whole_Blood	rs34238187
GOBP_CELLULAR_COMPONENT_ASSEMBLY_INVOLVED_IN_MORPHOGENESIS	GOBP_CELLULAR_COMPONENT_ASSEMBLY_INVOLVED_IN_MORPHOGENESIS	3.74126e-05	0.000396987	NA	TNNT2/ACTC1	2	Whole_Blood	rs34238187
GOBP_STRIATED_MUSCLE_CELL_DEVELOPMENT	GOBP_STRIATED_MUSCLE_CELL_DEVELOPMENT	3.96987e-05	0.000396987	NA	TNNT2/ACTC1	2	Whole_Blood	rs34238187
GOBP_ACTIN_MEDIATED_CELL_CONTRACTION	GOBP_ACTIN_MEDIATED_CELL_CONTRACTION	5.39287e-05	0.000490261	NA	TNNT2/ACTC1	2	Whole_Blood	rs34238187
GOBP_CARDIAC_MUSCLE_CONTRACTION	GOBP_CARDIAC_MUSCLE_CONTRACTION	6.82828e-05	0.000569023	NA	TNNT2/ACTC1	2	Whole_Blood	rs34238187
GOBP_ACTIN_FILAMENT_BASED_MOVEMENT	GOBP_ACTIN_FILAMENT_BASED_MOVEMENT	8.43202e-05	0.000648617	NA	TNNT2/ACTC1	2	Whole_Blood	rs34238187
GOBP_MUSCLE_CELL_DEVELOPMENT	GOBP_MUSCLE_CELL_DEVELOPMENT	0.000105783	0.000755595	NA	TNNT2/ACTC1	2	Whole_Blood	rs34238187
GOBP_STRIATED_MUSCLE_CONTRACTION	GOBP_STRIATED_MUSCLE_CONTRACTION	0.000116098	0.000773988	NA	TNNT2/ACTC1	2	Whole_Blood	rs34238187
GOBP_ACTOMYOSIN_STRUCTURE_ORGANIZATION	GOBP_ACTOMYOSIN_STRUCTURE_ORGANIZATION	0.000135296	0.000838272	NA	TNNT2/ACTC1	2	Whole_Blood	rs34238187
REACTOME_MUSCLE_CONTRACTION	REACTOME_MUSCLE_CONTRACTION	0.000142506	0.000838272	NA	TNNT2/ACTC1	2	Whole_Blood	rs34238187
GOBP_CARDIAC_MUSCLE_TISSUE_DEVELOPMENT	GOBP_CARDIAC_MUSCLE_TISSUE_DEVELOPMENT	0.000162122	0.000900676	NA	TNNT2/ACTC1	2	Whole_Blood	rs34238187
GOBP_HEART_MORPHOGENESIS	GOBP_HEART_MORPHOGENESIS	0.000213959	0.0011261	NA	TNNT2/ACTC1	2	Whole_Blood	rs34238187
GOBP_STRIATED_MUSCLE_CELL_DIFFERENTIATION	GOBP_STRIATED_MUSCLE_CELL_DIFFERENTIATION	0.000270897	0.00135448	NA	TNNT2/ACTC1	2	Whole_Blood	rs34238187
GOBP_HEART_PROCESS	GOBP_HEART_PROCESS	0.000312546	0.00148832	NA	TNNT2/ACTC1	2	Whole_Blood	rs34238187
GOBP_MUSCLE_ORGAN_DEVELOPMENT	GOBP_MUSCLE_ORGAN_DEVELOPMENT	0.000375804	0.0017082	NA	TNNT2/ACTC1	2	Whole_Blood	rs34238187
GOBP_MUSCLE_CONTRACTION	GOBP_MUSCLE_CONTRACTION	0.00046297	0.00201291	NA	TNNT2/ACTC1	2	Whole_Blood	rs34238187
GOBP_MUSCLE_CELL_DIFFERENTIATION	GOBP_MUSCLE_CELL_DIFFERENTIATION	0.000489522	0.00203967	NA	TNNT2/ACTC1	2	Whole_Blood	rs34238187
GOBP_MUSCLE_TISSUE_DEVELOPMENT	GOBP_MUSCLE_TISSUE_DEVELOPMENT	0.000514044	0.00205618	NA	TNNT2/ACTC1	2	Whole_Blood	rs34238187
GOBP_MUSCLE_SYSTEM_PROCESS	GOBP_MUSCLE_SYSTEM_PROCESS	0.000764646	0.00294095	NA	TNNT2/ACTC1	2	Whole_Blood	rs34238187
