# Supplementary material for: Genome-wide association study for Chagas Cardiomyopathy identify a new risk locus on chromosome 18 associated with an immune-related protein and transcriptional signature
Source: PLoS Negl Trop Dis. 2022 Oct 10;16(10):e0010725. doi: 10.1371/journal.pntd.0010725 (PMC9550069; doi:10.1371/journal.pntd.0010725)
Supplement: S2 Table — (XLSX) [file pntd.0010725.s010.xlsx]

## Sheet: Sheet1
Blood Protein Traits	H4 coloc probability	Directionality
E3 ubiquitin-protein ligase CCNB1IP1	0.976761	↓
Kunitz-type protease inhibitor 1	0.955024	↑
Ribosyldihydronicotinamide dehydrogenase [quinone]	0.943501	↑
Glycosyltransferase-like protein LARGE1	0.928878	↑
Ras-related protein Rab-35	0.919008	↑
Protein sel-1 homolog 2	0.918998	↑
Peroxisomal NADH pyrophosphatase NUDT12	0.895413	↓
Ephrin-A5	0.883023	↑
Linker for activation of T-cells family member 1	0.820727	↑
H4 coloc probability refers to the posterior probability of having a single causal variant for both traits.
↓ - Decreased level of protein associated with increased risk of Chagas cardiomyopathy
↑ - Increased level of protein associated with increased risk of Chagas cardiomyopahty
