# Supplementary material for: Genome-wide association study for Chagas Cardiomyopathy identify a new risk locus on chromosome 18 associated with an immune-related protein and transcriptional signature
Source: PLoS Negl Trop Dis. 2022 Oct 10;16(10):e0010725. doi: 10.1371/journal.pntd.0010725 (PMC9550069; doi:10.1371/journal.pntd.0010725)
Supplement: S3 Table — (XLS) [file pntd.0010725.s011.xls]

## Sheet: eQTLs_associated_TAD_domain
Ensembl Gene ID	Gene	Beta	SE	p value	HGNC Symbol	External Gene Name	Chromosome	Start Position	End Position	Gene symbol	GTEx Tissue
ENSG00000177426	ENSG00000177426.20	0.457922	0.17683	0.00985	TGIF1	TGIF1	18	3411608	3459978	TGIF1	Adipose_Subcutaneous
ENSG00000262001	ENSG00000262001.1	0.757734	0.229519	0.0010519	DLGAP1-AS2	DLGAP1-AS2	18	3603000	3610103	DLGAP1-AS2	Artery_Aorta
ENSG00000262001	ENSG00000262001.1	0.517726	0.184761	0.0052456	DLGAP1-AS2	DLGAP1-AS2	18	3603000	3610103	DLGAP1-AS2	Artery_Tibial
ENSG00000198081	ENSG00000198081.10	1.09938	0.34243	0.00167829	ZBTB14	ZBTB14	18	5289019	5297053	ZBTB14	Brain_Amygdala
ENSG00000206432	ENSG00000206432.4	-0.993972	0.296429	0.000953132	TMEM200C	TMEM200C	18	5882072	5895955	TMEM200C	Brain_Cortex
ENSG00000170579	ENSG00000170579.16	-0.909044	0.297769	0.00257022	DLGAP1	DLGAP1	18	3496032	4455307	DLGAP1	Brain_Cortex
ENSG00000263724	ENSG00000263724.1	-1.27304	0.341346	0.000259828	DLGAP1-AS3	DLGAP1-AS3	18	3878058	3897069	DLGAP1-AS3	Brain_Frontal_Cortex_BA9
ENSG00000101605	ENSG00000101605.12	1.15642	0.343736	0.000945171	MYOM1	MYOM1	18	3066807	3219968	MYOM1	Brain_Frontal_Cortex_BA9
ENSG00000263878	ENSG00000263878.1	-0.930734	0.347675	0.0081427	DLGAP1-AS4	DLGAP1-AS4	18	3962353	4024150	DLGAP1-AS4	Brain_Frontal_Cortex_BA9
ENSG00000261520	ENSG00000261520.5	1.30715	0.290233	1.13332e-05	DLGAP1-AS5	DLGAP1-AS5	18	4264602	4295405	DLGAP1-AS5	Brain_Nucleus_accumbens_basal_ganglia
ENSG00000101605	ENSG00000101605.12	0.914861	0.297647	0.00240961	MYOM1	MYOM1	18	3066807	3219968	MYOM1	Brain_Nucleus_accumbens_basal_ganglia
ENSG00000101605	ENSG00000101605.12	0.895009	0.311854	0.00463316	MYOM1	MYOM1	18	3066807	3219968	MYOM1	Brain_Putamen_basal_ganglia
ENSG00000266835	ENSG00000266835.5	0.965504	0.303723	0.00191177	GAPLINC	GAPLINC	18	3466250	3478978	GAPLINC	Brain_Substantia_nigra
ENSG00000198081	ENSG00000198081.10	0.860942	0.328019	0.00988389	ZBTB14	ZBTB14	18	5289019	5297053	ZBTB14	Brain_Substantia_nigra
ENSG00000082397	ENSG00000082397.17	0.755044	0.229523	0.00109349	EPB41L3	EPB41L3	18	5392381	5630700	EPB41L3	Breast_Mammary_Tissue
ENSG00000264575	ENSG00000264575.1	-0.672189	0.230176	0.00369759	LINC00526	LINC00526	18	5236724	5238598	LINC00526	Breast_Mammary_Tissue
ENSG00000206432	ENSG00000206432.4	0.790985	0.299433	0.00888444	TMEM200C	TMEM200C	18	5882072	5895955	TMEM200C	Liver
ENSG00000177426	ENSG00000177426.20	0.513562	0.184689	0.00559382	TGIF1	TGIF1	18	3411608	3459978	TGIF1	Skin_Sun_Exposed_Lower_leg
